# Supplementary material for: Sublethal Exposure Effects of the Neonicotinoid Clothianidin Strongly Modify the Brain Transcriptome and Proteome in the Male Moth Agrotis ipsilon
Source: MDPI journal article supplement (doi:10.3390/insects12020152), 2021-02-11
Supplement: s1 [file s1]

| TRINITY CODE             | logFC_clothia_D<br>MSO | logFC_clothia_control | annotation                                                                          |
|--------------------------|------------------------|-----------------------|-------------------------------------------------------------------------------------|
| TRINITY_DN5830_c0_g1_i1  | -0,513641902           | -0,725715713          | Full=Acetyl-CoA acetyltransferase B, mitochondrial;                                 |
| TRINITY_DN10709_c0_g1_i1 | -0,520581149           | -0,442197187          | Full=Catalase;                                                                      |
|                          |                        |                       | Full=UPF0061 protein xcc-b100_1894 {ECO:0000255 HAMAP-Rule:MF_00692};^Bacteria;     |
| TRINITY_DN4884_c0_g1_i1  | -0,542534545           | -0,705716908          | Proteobacteria; Gammaproteobacteria; Xanthomonadales; Xanthomonadaceae; Xanthomonas |
| TRINITY_DN19_c0_g1_i1    | -0,569901458           | -0,650555009          | Full=Adenosylhomocysteinase;                                                        |
| TRINITY_DN18786_c0_g1_i1 | -0,571570247           |                       | Full=Probable 39S ribosomal protein L45, mitochondrial;                             |
| TRINITY_DN18696_c0_g1_i1 | -0,609625906           | -0,442676401          |                                                                                     |
| TRINITY_DN1941_c0_g1_i1  | -0,623485171           | -0,886745415          | Full=Perilipin-4;                                                                   |
| TRINITY_DN5963_c0_g1_i1  | -0,63532932            | -0,536822159          | Full=Alkaline phosphatase, tissue-nonspecific isozyme;                              |
| TRINITY_DN15717_c0_g1_i1 | -0,636780777           |                       | Full=2-oxoglutarate dehydrogenase-like, mitochondrial;                              |
| TRINITY_DN224_c0_g1_i1   | -0,63976921            | -0,529861129          |                                                                                     |
| TRINITY_DN6720_c0_g1_i1  | -0,691291574           | -0,902046228          | Full=D-arabinitol dehydrogenase 1;                                                  |
| TRINITY_DN11543_c0_g1_i1 | -0,733684853           | -0,538758739          |                                                                                     |
| TRINITY_DN4730_c0_g1_i1  | -0,741326982           | -0,531266701          | Full=Mevalonate kinase;                                                             |
| TRINITY_DN2762_c0_g1_i1  | -0,87487484            | -0,64799718           |                                                                                     |
| TRINITY_DN19669_c0_g1_i1 | -0,875346814           | -1,228200397          | Full=BolA-like protein DDB_G0274169;                                                |
| TRINITY_DN14430_c0_g1_i1 | -0,90842733            | -0,942056234          | Full=Copia protein;                                                                 |
| TRINITY_DN9205_c0_g1_i1  | -0,991980293           |                       | Full=Fumarate hydratase, mitochondrial;                                             |
| TRINITY_DN22277_c0_g1_i1 | -1,033765049           |                       | Full=Mannose-6-phosphate isomerase;                                                 |
| TRINITY_DN7069_c0_g1_i1  | -1,063494271           | -1,265905906          | Full=Solute carrier family 46 member 3;                                             |
| TRINITY_DN19532_c0_g1_i1 | -1,103151648           | -1,337305347          | Full=Protein takeout;                                                               |
| TRINITY_DN35019_c0_g1_i1 | -1,140092084           | -0,724121858          | Full=Zonadhesin;                                                                    |
| TRINITY_DN34496_c0_g1_i1 | -1,261541342           | -1,454106987          | Full=Esterase B1;                                                                   |
| TRINITY_DN10489_c0_g1_i1 | -1,281329447           | -1,407962294          |                                                                                     |
| TRINITY_DN3287_c0_g1_i1  | -1,365197223           | -1,264300341          |                                                                                     |
| TRINITY_DN10545_c0_g1_i1 | -1,385574484           | -1,351259084          | Full=Probable RNA-directed DNA polymerase from transposon BS;                       |
| TRINITY_DN35801_c0_g1_i1 | -1,448523719           | -1,081196088          | Full=Condensin complex subunit 1;                                                   |
| TRINITY_DN9370_c0_g1_i1  | -1,673941476           | -1,721808867          |                                                                                     |
| TRINITY_DN18812_c0_g1_i1 | -1,701359832           | -1,448433673          | Full=Farnesoate epoxidase {ECO:0000305};                                            |

|                          |              |                                                                                                                                                                            |   |
|--------------------------|--------------|----------------------------------------------------------------------------------------------------------------------------------------------------------------------------|---|
| TRINITY_DN12841_c0_g1_i1 | -1,735143456 | -1,847724461 Full=40S ribosomal protein S12, mitochondrial;<br>Full=Elongation of very long chain fatty acids protein 7 {ECO:0000255 HAMAP-Rule:MF_03207,<br>ECO:0000305}; |   |
| TRINITY_DN32801_c0_g1_i1 | -1,778031857 | -2,309450409                                                                                                                                                               |   |
| TRINITY_DN37927_c0_g1_i1 | -1,783490336 | -2,312550939 Full=Endocuticle structural glycoprotein ABD-5;                                                                                                               |   |
| TRINITY_DN32791_c0_g1_i1 | -2,073754051 | Full=Ejaculatory bulb-specific protein 3;                                                                                                                                  |   |
| TRINITY_DN44850_c0_g1_i1 | -2,082048891 | -1,640420101 Full=CCR4-NOT transcription complex subunit 1;                                                                                                                |   |
| TRINITY_DN62406_c0_g1_i1 | -2,113532993 | -1,826508688                                                                                                                                                               | 0 |
| TRINITY_DN33988_c0_g1_i1 | -2,147000881 | -2,486090066 Full=Farnesoate epoxidase {ECO:0000305};                                                                                                                      |   |
| TRINITY_DN9591_c0_g1_i1  |              | -2,020068887                                                                                                                                                               | 0 |
| TRINITY_DN57731_c0_g1_i1 |              | -1,969575731                                                                                                                                                               | 0 |
| TRINITY_DN48162_c0_g1_i1 |              | -1,825079603 Full=RutC family protein C23G10.2;                                                                                                                            |   |
| TRINITY_DN36009_c0_g1_i1 |              | -1,777345642 Full=Protein-tyrosine sulfotransferase;                                                                                                                       |   |
| TRINITY_DN52557_c0_g1_i1 |              | -1,663113615                                                                                                                                                               | 0 |
| TRINITY_DN73860_c0_g1_i1 |              | -1,595329072                                                                                                                                                               | 0 |
| TRINITY_DN63597_c0_g1_i1 |              | -1,552194434 Full=Retrovirus-related Pol polyprotein from transposon TNT 1-94;                                                                                             |   |
| TRINITY_DN45251_c0_g1_i1 |              | -1,542749215                                                                                                                                                               | 0 |
| TRINITY_DN37602_c0_g1_i1 |              | -1,528539656 Full=D-amino-acid oxidase;                                                                                                                                    |   |
| TRINITY_DN52570_c0_g1_i1 |              | -1,515313295 Full=Protein Skeletor, isoforms B/C;                                                                                                                          |   |
| TRINITY_DN2872_c0_g1_i1  |              | -1,514107452 Full=mRNA export factor;                                                                                                                                      |   |
| TRINITY_DN27963_c0_g1_i1 |              | -1,48614603 Full=Probable cytochrome P450 6a13;                                                                                                                            |   |
| TRINITY_DN39050_c0_g1_i1 |              | -1,471120839 Full=Copia protein;                                                                                                                                           |   |
| TRINITY_DN26418_c0_g1_i1 |              | -1,443791536 Full=Zinc finger protein 554;                                                                                                                                 |   |
| TRINITY_DN20937_c0_g1_i1 |              | -1,420795449 Full=Cytochrome P450 4c3;                                                                                                                                     |   |
| TRINITY_DN41552_c0_g1_i1 |              | -1,416548266                                                                                                                                                               | 0 |
| TRINITY_DN47964_c0_g1_i1 |              | -1,393462361                                                                                                                                                               | 0 |
| TRINITY_DN29880_c0_g1_i1 |              | -1,371808831 Full=Facilitated trehalose transporter Tret1 {ECO:0000303 PubMed:20035867};                                                                                   |   |
| TRINITY_DN33195_c0_g1_i1 |              | -1,32554914 Full=Glia maturation factor beta;                                                                                                                              |   |
| TRINITY_DN54768_c0_g1_i1 |              | -1,310088827 Full=Serine incorporator 1;                                                                                                                                   |   |
| TRINITY_DN31189_c0_g1_i1 |              | -1,31008179 Full=Splicing factor 1;                                                                                                                                        |   |
| TRINITY_DN17813_c0_g1_i1 |              | -1,290288121                                                                                                                                                               | 0 |
| TRINITY_DN46000_c0_g1_i1 |              | -1,281406117                                                                                                                                                               | 0 |

|                          |                                                                                   |   |
|--------------------------|-----------------------------------------------------------------------------------|---|
| TRINITY_DN67295_c0_g1_i1 | -1,27866098                                                                       | 0 |
| TRINITY_DN37510_c0_g1_i1 | -1,235128636                                                                      | 0 |
| TRINITY_DN34640_c0_g1_i1 | -1,228664758 Full=Oocyte zinc finger protein XICOF26;                             |   |
| TRINITY_DN36002_c0_g1_i1 | -1,221247347 Full=Lysosomal acid phosphatase;                                     |   |
| TRINITY_DN50955_c0_g1_i1 | -1,20755057 Full=Ubiquitin conjugation factor E4 B {ECO:0000305};                 |   |
| TRINITY_DN44849_c0_g1_i1 | -1,196824664 Full=Cystathionine beta-synthase {ECO:0000305};                      |   |
| TRINITY_DN22655_c0_g1_i1 | -1,196069464 Full=Very long-chain specific acyl-CoA dehydrogenase, mitochondrial; |   |
| TRINITY_DN4543_c0_g1_i1  | -1,189910587 Full=DNA replication licensing factor mcm7;                          |   |
| TRINITY_DN27817_c0_g1_i1 | -1,189334492                                                                      | 0 |
| TRINITY_DN7348_c0_g1_i1  | -1,175124346 Full=Retrovirus-related Pol polyprotein from transposon TNT 1-94;    |   |
| TRINITY_DN34041_c0_g1_i1 | -1,164139921                                                                      | 0 |
| TRINITY_DN37703_c0_g1_i1 | -1,158359891 Full=Cytochrome P450 6B7;                                            |   |
| TRINITY_DN56752_c0_g1_i1 | -1,152762601                                                                      | 0 |
| TRINITY_DN47838_c0_g1_i1 | -1,1280387                                                                        | 0 |
| TRINITY_DN20711_c0_g1_i1 | -1,125122033 Full=Protein lethal(2)essential for life;                            |   |
| TRINITY_DN35001_c0_g1_i1 | -1,114169546                                                                      | 0 |
| TRINITY_DN49009_c0_g1_i1 | -1,113141069                                                                      | 0 |
| TRINITY_DN45184_c0_g1_i1 | -1,110875489 Full=E3 ubiquitin-protein ligase HECTD1;                             |   |
| TRINITY_DN53086_c0_g1_i1 | -1,100797479                                                                      | 0 |
| TRINITY_DN30346_c0_g1_i1 | -1,099975516                                                                      | 0 |
| TRINITY_DN33202_c0_g1_i1 | -1,098505524                                                                      | 0 |
| TRINITY_DN33981_c0_g1_i1 | -1,095843792                                                                      | 0 |
| TRINITY_DN20276_c0_g1_i1 | -1,074992801 Full=Fructose-1,6-bisphosphatase 1;                                  |   |
| TRINITY_DN32771_c0_g1_i1 | -1,074310511                                                                      | 0 |
| TRINITY_DN16217_c0_g1_i1 | -1,073856776 Full=Membrane-associated progesterone receptor component 2;          |   |
| TRINITY_DN3733_c0_g1_i1  | -1,073610856 Full=Protein msta, isoform A;                                        |   |
| TRINITY_DN21720_c0_g1_i1 | -1,062186842                                                                      | 0 |
| TRINITY_DN23451_c0_g1_i1 | -1,058121874 Full=Ras-related protein Rab-32;                                     |   |
| TRINITY_DN22829_c0_g1_i1 | -1,05724383 Full=AT-rich interactive domain-containing protein 1A;                |   |
| TRINITY_DN21151_c0_g1_i1 | -1,057019494                                                                      | 0 |
| TRINITY_DN32473_c0_g1_i1 | -1,05513924 Full=Dual specificity protein phosphatase 23;                         |   |

|                          |              |                                                                                     |   |
|--------------------------|--------------|-------------------------------------------------------------------------------------|---|
| TRINITY_DN55965_c0_g1_i1 | -1,054773644 | Full=F-box only protein 11;                                                         |   |
| TRINITY_DN24380_c0_g1_i1 | -1,041734693 | Full=Brahma-associated protein of 60 kDa;                                           |   |
| TRINITY_DN15632_c0_g1_i1 | -1,033722463 | Full=Protein pigeon;                                                                |   |
| TRINITY_DN33400_c0_g1_i1 | -1,02914242  | Full=5-hydroxytryptamine receptor;                                                  |   |
| TRINITY_DN14750_c0_g1_i1 | -1,027065665 | Full=Poly(U)-binding-splicing factor half pint;                                     |   |
| TRINITY_DN41250_c0_g1_i1 | -1,026338677 | Full=Macrophage erythroblast attacher;                                              |   |
| TRINITY_DN21996_c0_g1_i1 | -1,021689143 | Full=Eclosion hormone;                                                              |   |
| TRINITY_DN20175_c0_g1_i1 | -1,011301077 | Full=ATP-binding cassette sub-family A member 3;                                    |   |
| TRINITY_DN34530_c0_g1_i1 | -1,007517224 |                                                                                     | 0 |
| TRINITY_DN21522_c0_g1_i1 | -1,004374832 | Full=(E3-independent) E2 ubiquitin-conjugating enzyme;                              |   |
| TRINITY_DN3720_c0_g1_i1  | -1,004286319 | Full=Monocarboxylate transporter 12;                                                |   |
| TRINITY_DN21134_c0_g1_i1 | -1,001265033 | Full=Lipopolysaccharide-induced tumor necrosis factor-alpha factor homolog;         |   |
| TRINITY_DN21971_c0_g1_i1 | -0,989135572 |                                                                                     | 0 |
| TRINITY_DN19718_c0_g1_i1 | -0,985647264 | Full=Hemolymph lipopolysaccharide-binding protein;                                  |   |
| TRINITY_DN34105_c0_g1_i1 | -0,971997957 | Full=OCIA domain-containing protein 1;                                              |   |
| TRINITY_DN25820_c0_g1_i1 | -0,969939556 |                                                                                     | 0 |
| TRINITY_DN34383_c0_g1_i1 | -0,964500741 | Full=Cytochrome P450 4C1;                                                           |   |
| TRINITY_DN46386_c0_g1_i1 | -0,960304355 |                                                                                     | 0 |
| TRINITY_DN27671_c0_g1_i1 | -0,956631868 |                                                                                     | 0 |
| TRINITY_DN12496_c0_g1_i1 | -0,951682777 | Full=Annexin B9;                                                                    |   |
| TRINITY_DN13662_c0_g1_i1 | -0,950073107 |                                                                                     | 0 |
| TRINITY_DN26208_c0_g1_i1 | -0,947155393 | Full=Retrovirus-related Pol polyprotein from type-2 retrotransposable element R2DM; |   |
| TRINITY_DN15290_c0_g1_i1 | -0,936031547 | Full=Cystathionine beta-synthase {ECO:0000305};                                     |   |
| TRINITY_DN16883_c0_g1_i1 | -0,924392323 |                                                                                     | 0 |
| TRINITY_DN8091_c0_g1_i1  | -0,917999507 |                                                                                     | 0 |
| TRINITY_DN7376_c0_g1_i1  | -0,913216932 | Full=DDB1- and CUL4-associated factor 13;                                           |   |
| TRINITY_DN20516_c0_g1_i1 | -0,910908533 | Full=Kynurenine 3-monooxygenase {ECO:0000255 HAMAP-Rule:MF_03018};                  |   |
| TRINITY_DN3529_c0_g1_i1  | -0,910865386 | Full=Very long-chain specific acyl-CoA dehydrogenase, mitochondrial;                |   |
| TRINITY_DN43024_c0_g1_i1 | -0,910219291 | Full=Transmembrane protein 184C;                                                    |   |
| TRINITY_DN32762_c0_g1_i1 | -0,9089199   | Full=Zinc finger protein 2;                                                         |   |

|                          |              |                                                                                                                                            |   |
|--------------------------|--------------|--------------------------------------------------------------------------------------------------------------------------------------------|---|
| TRINITY_DN24346_c0_g1_i1 | -0,908119335 | Full=Protein stoned-B;                                                                                                                     |   |
| TRINITY_DN9464_c0_g1_i1  | -0,90693156  |                                                                                                                                            | 0 |
| TRINITY_DN17472_c0_g1_i1 | -0,904950526 |                                                                                                                                            | 0 |
| TRINITY_DN1185_c0_g1_i1  | -0,902828678 | Full=Coiled-coil domain-containing protein 12;                                                                                             |   |
| TRINITY_DN78118_c0_g1_i1 | -0,902652632 | Full=SH3 domain-binding glutamic acid-rich protein homolog;                                                                                |   |
| TRINITY_DN24001_c0_g1_i1 | -0,895184095 |                                                                                                                                            | 0 |
| TRINITY_DN8817_c0_g1_i1  | -0,892239133 |                                                                                                                                            | 0 |
| TRINITY_DN19719_c0_g1_i1 | -0,888800601 |                                                                                                                                            | 0 |
| TRINITY_DN22064_c0_g1_i1 | -0,884049698 | Full=Ribonuclease P protein subunit p40;<br>Full=Ecdysteroid UDP-glucosyltransferase;^Viruses; dsDNA viruses, no RNA stage; Baculoviridae; |   |
| TRINITY_DN19380_c0_g1_i1 | -0,868888348 | Alphabaculovirus                                                                                                                           |   |
| TRINITY_DN21182_c0_g1_i1 | -0,864171025 | Full=Leucine-rich repeat-containing protein C10orf11 homolog;                                                                              |   |
| TRINITY_DN32910_c0_g1_i1 | -0,84304084  |                                                                                                                                            | 0 |
| TRINITY_DN19775_c0_g1_i1 | -0,841366524 | Full=28S ribosomal protein S2, mitochondrial;                                                                                              |   |
| TRINITY_DN3399_c0_g1_i1  | -0,833315505 | Full=Potassium channel subfamily K member 18;                                                                                              |   |
| TRINITY_DN6891_c0_g1_i1  | -0,831575023 | Full=Glucose dehydrogenase [FAD, quinone];                                                                                                 |   |
| TRINITY_DN20079_c0_g1_i1 | -0,82525307  |                                                                                                                                            | 0 |
| TRINITY_DN25896_c0_g1_i1 | -0,82297246  | Full=Probable RNA-directed DNA polymerase from transposon BS;                                                                              |   |
| TRINITY_DN4348_c0_g1_i1  | -0,814305212 | Full=KAT8 regulatory NSL complex subunit 1;                                                                                                |   |
| TRINITY_DN4809_c0_g1_i1  | -0,814165589 | Full=Protein lethal(2)essential for life;                                                                                                  |   |
| TRINITY_DN18994_c0_g1_i1 | -0,8136373   | Full=Fork head domain transcription factor slp2;                                                                                           |   |
| TRINITY_DN15415_c0_g1_i1 | -0,812983731 | Full=Kelch-like protein diablo {ECO:0000250 UniProtKB:Q9VUU5};                                                                             |   |
| TRINITY_DN53395_c0_g1_i1 | -0,811465141 |                                                                                                                                            | 0 |
| TRINITY_DN18890_c0_g1_i1 | -0,806442829 |                                                                                                                                            | 0 |
| TRINITY_DN19221_c0_g1_i1 | -0,806038348 | Full=Putative OPA3-like protein CG13603;                                                                                                   |   |
| TRINITY_DN21928_c0_g1_i1 | -0,794791029 | Full=Golgi SNAP receptor complex member 1;                                                                                                 |   |
| TRINITY_DN24711_c0_g1_i1 | -0,794732346 |                                                                                                                                            | 0 |
| TRINITY_DN8335_c0_g1_i1  | -0,774411922 | Full=Transcription factor SOX-2;                                                                                                           |   |
| TRINITY_DN3669_c0_g1_i1  | -0,75749847  | Full=Reticulon-3-B;                                                                                                                        |   |
| TRINITY_DN22300_c0_g1_i1 | -0,757011027 |                                                                                                                                            | 0 |
| TRINITY_DN16597_c0_g1_i1 | -0,755868879 |                                                                                                                                            | 0 |

|                          |              |                                                                                                                |   |
|--------------------------|--------------|----------------------------------------------------------------------------------------------------------------|---|
| TRINITY_DN19305_c0_g1_i1 | -0,755515714 | Full=Protein HGH1 homolog;                                                                                     |   |
| TRINITY_DN14880_c0_g1_i1 | -0,754711385 | Full=E3 ubiquitin-protein ligase RNF31;                                                                        |   |
| TRINITY_DN19747_c0_g1_i1 | -0,753008947 | Full=17-beta-hydroxysteroid dehydrogenase 14;                                                                  |   |
| TRINITY_DN2514_c0_g1_i1  | -0,745349969 | Full=Transposable element Tcb2 transposase;                                                                    |   |
| TRINITY_DN12873_c0_g1_i1 | -0,742620116 |                                                                                                                | 0 |
| TRINITY_DN20149_c0_g1_i1 | -0,735517231 | Full=THAP domain-containing protein 4;                                                                         |   |
| TRINITY_DN11696_c0_g1_i1 | -0,733666074 | Full=Set1/Ash2 histone methyltransferase complex subunit ASH2 {ECO:0000303 PubMed:21694722};                   |   |
| TRINITY_DN36247_c0_g1_i1 | -0,729064216 | Full=Heat shock protein beta-6;                                                                                |   |
| TRINITY_DN1008_c0_g1_i1  | -0,726796764 | Full=Uncharacterized kinase-like protein D1044.1;                                                              |   |
| TRINITY_DN7747_c0_g1_i1  | -0,726407963 | Full=Phosphatidylcholine:ceramide cholinephosphotransferase 1;                                                 |   |
| TRINITY_DN32999_c0_g1_i1 | -0,722523468 | Full=15 kDa selenoprotein;                                                                                     |   |
| TRINITY_DN21216_c0_g1_i1 | -0,716905716 |                                                                                                                | 0 |
| TRINITY_DN12072_c0_g1_i1 | -0,712590178 |                                                                                                                | 0 |
| TRINITY_DN1903_c0_g1_i1  | -0,70549103  | Full=Probable tRNA N6-adenosine threonylcarbamoyltransferase, mitochondrial {ECO:0000255 HAMAP-Rule:MF_03179}; |   |
| TRINITY_DN18714_c0_g1_i1 | -0,703271313 | Full=Guanine nucleotide-binding protein subunit beta-like protein;                                             |   |
| TRINITY_DN14109_c0_g1_i1 | -0,700207402 |                                                                                                                | 0 |
| TRINITY_DN11579_c0_g1_i1 | -0,69574151  | Full=ATP-binding cassette sub-family F member 3;                                                               |   |
| TRINITY_DN11305_c0_g1_i1 | -0,694500408 |                                                                                                                | 0 |
| TRINITY_DN20657_c0_g1_i1 | -0,693480244 | Full=Aldo-keto reductase AKR2E4;                                                                               |   |
| TRINITY_DN24011_c0_g1_i1 | -0,689068691 |                                                                                                                | 0 |
| TRINITY_DN178_c0_g1_i1   | -0,688509183 | Full=Sodium/potassium-transporting ATPase subunit beta-2;                                                      |   |
| TRINITY_DN1472_c0_g1_i1  | -0,68836351  | Full=Putative deoxyribonuclease TATDN1;                                                                        |   |
| TRINITY_DN17209_c0_g1_i1 | -0,688025898 | Full=Multifunctional methyltransferase subunit TRM112-like protein;                                            |   |
| TRINITY_DN14169_c0_g1_i1 | -0,68463568  |                                                                                                                | 0 |
| TRINITY_DN6746_c0_g1_i1  | -0,683815524 | Full=DNA polymerase alpha subunit B;                                                                           |   |
| TRINITY_DN17579_c0_g1_i1 | -0,679274504 | Full=Armadillo segment polarity protein;                                                                       |   |
| TRINITY_DN11463_c0_g1_i1 | -0,672049538 | Full=Transposon Ty3-I Gag-Pol polyprotein;                                                                     |   |
| TRINITY_DN26843_c0_g1_i1 | -0,671625358 | Full=Nascent polypeptide-associated complex subunit alpha;                                                     |   |
| TRINITY_DN21452_c0_g1_i1 | -0,669386926 | Full=Acyl-CoA Delta(11) desaturase;                                                                            |   |
| TRINITY_DN5783_c0_g1_i1  | -0,667098348 | Full=Importin-5;                                                                                               |   |

|                          |              |                                                                         |   |
|--------------------------|--------------|-------------------------------------------------------------------------|---|
| TRINITY_DN4737_c0_g1_i1  | -0,661726229 | Full=ER membrane protein complex subunit 7;                             |   |
| TRINITY_DN8834_c0_g1_i1  | -0,661492791 |                                                                         | 0 |
| TRINITY_DN1358_c0_g1_i1  | -0,660900681 | Full=28S ribosomal protein S34, mitochondrial;                          |   |
| TRINITY_DN11096_c0_g1_i1 | -0,660209971 | Full=Cathepsin L;                                                       |   |
| TRINITY_DN15408_c0_g1_i1 | -0,658208791 | Full=Arginine/serine-rich coiled-coil protein 2;                        |   |
| TRINITY_DN10895_c0_g1_i1 | -0,657339856 | Full=Mitochondrial import inner membrane translocase subunit Tim22;     |   |
| TRINITY_DN34289_c0_g1_i1 | -0,656839314 |                                                                         | 0 |
| TRINITY_DN10835_c0_g1_i1 | -0,654615719 | Full=40S ribosomal protein S6;                                          |   |
| TRINITY_DN12215_c0_g1_i1 | -0,652396748 | Full=Probable U3 small nucleolar RNA-associated protein 11;             |   |
| TRINITY_DN5297_c0_g1_i1  | -0,651288093 | Full=Electron transfer flavoprotein subunit alpha, mitochondrial;       |   |
| TRINITY_DN60962_c0_g1_i1 | -0,650891639 | Full=40S ribosomal protein S8;                                          |   |
| TRINITY_DN6021_c0_g1_i1  | -0,649199318 |                                                                         | 0 |
| TRINITY_DN13521_c0_g1_i1 | -0,646971015 | Full=Interleukin enhancer-binding factor 2 homolog;                     |   |
| TRINITY_DN19975_c0_g1_i1 | -0,64501874  |                                                                         | 0 |
| TRINITY_DN32690_c0_g1_i1 | -0,644962668 |                                                                         | 0 |
| TRINITY_DN13143_c0_g1_i1 | -0,644242954 |                                                                         | 0 |
| TRINITY_DN2973_c0_g1_i1  | -0,640371807 | Full=Fragile X mental retardation syndrome-related protein 1;           |   |
| TRINITY_DN3920_c0_g1_i1  | -0,637034873 | Full=Putative 115 kDa protein in type-1 retrotransposable element R1DM; |   |
| TRINITY_DN12604_c0_g1_i1 | -0,636473501 | Full=Heterogeneous nuclear ribonucleoprotein K;                         |   |
| TRINITY_DN2660_c0_g1_i1  | -0,635832639 | Full=Replication factor C subunit 1;                                    |   |
| TRINITY_DN179_c0_g1_i1   | -0,634066001 | Full=Venom carboxylesterase-6;                                          |   |
| TRINITY_DN5682_c0_g1_i1  | -0,633589312 | Full=Nuclear fragile X mental retardation-interacting protein 1;        |   |
| TRINITY_DN5813_c0_g1_i1  | -0,633156573 | Full=RNA-binding protein 45;                                            |   |
| TRINITY_DN17106_c0_g1_i1 | -0,632832101 | Full=Xaa-Pro dipeptidase;                                               |   |
| TRINITY_DN6248_c0_g1_i1  | -0,632055851 |                                                                         | 0 |
| TRINITY_DN33125_c0_g1_i1 | -0,62961523  | Full=COX assembly mitochondrial protein homolog;                        |   |
| TRINITY_DN5740_c0_g1_i1  | -0,628411057 | Full=Glutathione S-transferase 1;                                       |   |
| TRINITY_DN20194_c0_g1_i1 | -0,626992504 |                                                                         | 0 |
| TRINITY_DN7191_c0_g1_i1  | -0,626147963 | Full=Deoxyhypusine hydroxylase {ECO:0000255 HAMAP-Rule:MF_03101};       |   |
| TRINITY_DN1684_c0_g1_i1  | -0,614647461 | Full=Putative inorganic phosphate cotransporter;                        |   |
| TRINITY_DN18560_c0_g1_i1 | -0,614438281 |                                                                         | 0 |

|                          |              |                                                                                            |   |
|--------------------------|--------------|--------------------------------------------------------------------------------------------|---|
| TRINITY_DN5545_c0_g1_i1  | -0,611475274 | Full=Peptidoglycan-recognition protein LB;                                                 |   |
| TRINITY_DN19563_c0_g1_i1 | -0,610114157 | Full=Probable 28S ribosomal protein S26, mitochondrial;                                    |   |
| TRINITY_DN11314_c0_g1_i1 | -0,610077123 | Full=Protein SMG9;                                                                         |   |
| TRINITY_DN18661_c0_g1_i1 | -0,609170134 |                                                                                            | 0 |
| TRINITY_DN19231_c0_g1_i1 | -0,609063638 |                                                                                            | 0 |
| TRINITY_DN7458_c0_g1_i1  | -0,607697153 | Full=Ecdysone-inducible protein E75;                                                       |   |
| TRINITY_DN12361_c0_g1_i1 | -0,607322947 |                                                                                            | 0 |
| TRINITY_DN6082_c0_g1_i1  | -0,60724397  | Full=Cystinosin homolog;                                                                   |   |
| TRINITY_DN19423_c0_g1_i1 | -0,600317954 | Full=Probable proline--tRNA ligase, mitochondrial;                                         |   |
| TRINITY_DN34012_c0_g1_i1 | -0,599535674 | Full=Regulator of G-protein signaling 9;                                                   |   |
| TRINITY_DN16691_c0_g1_i1 | -0,598584912 | Full=Echinoderm microtubule-associated protein-like 2;                                     |   |
| TRINITY_DN4822_c0_g1_i1  | -0,59847525  | Full=Cell differentiation protein RCD1 homolog;                                            |   |
| TRINITY_DN19178_c0_g1_i1 | -0,593794606 | Full=RNA-binding protein 39;                                                               |   |
| TRINITY_DN11306_c0_g1_i1 | -0,592979727 | Full=60S ribosomal protein L4;                                                             |   |
| TRINITY_DN11421_c0_g1_i1 | -0,582253468 | Full=U8-agatoxin-Ao1a;                                                                     |   |
| TRINITY_DN11728_c0_g1_i1 | -0,577973809 | Full=Leucine zipper putative tumor suppressor 2 homolog {ECO:0000255 HAMAP-Rule:MF_03026}; |   |
| TRINITY_DN3075_c0_g1_i1  | -0,57671918  | Full=E3 ubiquitin-protein ligase hyd;                                                      |   |
| TRINITY_DN10748_c0_g1_i1 | -0,576633642 | Full=NEDD8-activating enzyme E1 regulatory subunit;                                        |   |
| TRINITY_DN32399_c0_g1_i1 | -0,575873213 | Full=60S ribosomal protein L10a;                                                           |   |
| TRINITY_DN13715_c0_g1_i1 | -0,574592497 | Full=Protein Tob2;                                                                         |   |
| TRINITY_DN22013_c0_g1_i1 | -0,569813892 | Full=RAD50-interacting protein 1;                                                          |   |
| TRINITY_DN11932_c0_g1_i1 | -0,565210866 | Full=Zinc transporter 10;                                                                  |   |
| TRINITY_DN263_c0_g1_i1   | -0,564570504 | Full=Mitochondrial carrier homolog 2;                                                      |   |
| TRINITY_DN32818_c0_g1_i1 | -0,563049604 | Full=PBAN-type neuropeptides;                                                              |   |
| TRINITY_DN12392_c0_g1_i1 | -0,561928909 | Full=SOSS complex subunit C homolog;                                                       |   |
| TRINITY_DN13306_c0_g1_i1 | -0,560970925 | Full=Venom acid phosphatase Acph-1;                                                        |   |
| TRINITY_DN11386_c0_g1_i1 | -0,560935136 | Full=Protein CREG1;                                                                        |   |
| TRINITY_DN12559_c0_g1_i1 | -0,560056642 | Full=Phospholipid phosphatase 3 {ECO:0000250 UniProtKB:O14495};                            |   |
| TRINITY_DN20560_c0_g1_i1 | -0,5591471   | Full=Acyl carrier protein, mitochondrial;                                                  |   |
| TRINITY_DN415_c0_g1_i1   | -0,557335261 | Full=Cytoglobin-1;                                                                         |   |



|                          |              |                                                                                                                                                               |   |
|--------------------------|--------------|---------------------------------------------------------------------------------------------------------------------------------------------------------------|---|
| TRINITY_DN11400_c0_g1_i1 | -0,555260656 | Full=Retrovirus-related Pol polyprotein from transposon TNT 1-94;                                                                                             |   |
| TRINITY_DN11843_c0_g1_i1 | -0,552598378 | Full=Organic solute transporter alpha-like protein;<br>Full=Zinc-type alcohol dehydrogenase-like protein SERP1785;^Bacteria; Firmicutes; Bacilli; Bacillales; |   |
| TRINITY_DN81_c0_g1_i1    | -0,550832753 | Staphylococcus                                                                                                                                                |   |
| TRINITY_DN11813_c0_g1_i1 | -0,547501505 | Full=DNA repair protein XRCC4;                                                                                                                                |   |
| TRINITY_DN37010_c0_g1_i1 | -0,547451597 | Full=Heat shock 70 kDa protein cognate 4;                                                                                                                     |   |
| TRINITY_DN2395_c0_g1_i1  | -0,547118737 | Full=Presenilin homolog;                                                                                                                                      |   |
| TRINITY_DN19316_c0_g1_i1 | -0,54521564  | Full=Long-chain-fatty-acid--CoA ligase 4;                                                                                                                     |   |
| TRINITY_DN4990_c0_g1_i1  | -0,54299736  | Full=Proteasome subunit beta type-6;                                                                                                                          |   |
| TRINITY_DN13499_c0_g1_i1 | -0,542988735 |                                                                                                                                                               | 0 |
| TRINITY_DN11286_c0_g1_i1 | -0,54030911  | Full=Restin homolog;                                                                                                                                          |   |
| TRINITY_DN10953_c0_g1_i1 | -0,535839652 | Full=Synaptic vesicle glycoprotein 2B;                                                                                                                        |   |
| TRINITY_DN18973_c0_g1_i1 | -0,532658367 | Full=Lysine-specific demethylase 3B;                                                                                                                          |   |
| TRINITY_DN32372_c0_g1_i1 | -0,531451492 |                                                                                                                                                               | 0 |
| TRINITY_DN33601_c0_g1_i1 | -0,531334804 | Full=60S ribosomal protein L34;                                                                                                                               |   |
| TRINITY_DN7609_c0_g1_i1  | -0,530327214 |                                                                                                                                                               | 0 |
| TRINITY_DN20722_c0_g1_i1 | -0,53013434  | Full=Histone-lysine N-methyltransferase ash1;                                                                                                                 |   |
| TRINITY_DN21531_c0_g1_i1 | -0,529895712 | Full=Serine palmitoyltransferase 2;                                                                                                                           |   |
| TRINITY_DN10916_c0_g1_i1 | -0,527958346 | Full=Non-specific lipid-transfer protein;                                                                                                                     |   |
| TRINITY_DN5792_c0_g1_i1  | -0,526313209 |                                                                                                                                                               | 0 |
| TRINITY_DN4845_c0_g1_i1  | -0,525146359 | Full=Nuclear transcription factor Y subunit alpha;                                                                                                            |   |
| TRINITY_DN18631_c0_g1_i1 | -0,524633821 | Full=40S ribosomal protein S2;<br>Full=Zinc-type alcohol dehydrogenase-like protein SERP1785;^Bacteria; Firmicutes; Bacilli; Bacillales;                      |   |
| TRINITY_DN4029_c0_g1_i1  | -0,523702652 | Staphylococcus                                                                                                                                                |   |
| TRINITY_DN18717_c0_g1_i1 | -0,523387183 | Full=CCHC-type zinc finger protein CG3800;                                                                                                                    |   |
| TRINITY_DN6150_c0_g1_i1  | -0,522870199 | Full=Adenylate kinase {ECO:0000255 HAMAP-Rule:MF_03168};                                                                                                      |   |
| TRINITY_DN5986_c0_g1_i1  | -0,522055569 |                                                                                                                                                               | 0 |
| TRINITY_DN14050_c0_g1_i1 | -0,52108517  |                                                                                                                                                               | 0 |
| TRINITY_DN2440_c0_g1_i1  | -0,519702086 | Full=Zinc finger CCCH domain-containing protein 18;                                                                                                           |   |
| TRINITY_DN10994_c0_g1_i1 | -0,519253361 | Full=60S ribosomal protein L6;                                                                                                                                |   |
| TRINITY_DN5128_c0_g1_i1  | -0,518751041 | Full=GTPase Era, mitochondrial;                                                                                                                               |   |
| TRINITY_DN5070_c0_g1_i1  | -0,518702361 | Full=Double-stranded RNA-binding protein Staufn homolog 1;                                                                                                    |   |

|                          |                                                                                              |   |
|--------------------------|----------------------------------------------------------------------------------------------|---|
| TRINITY_DN16_c0_g1_i1    | -0,518115012 Full=Growth hormone-inducible transmembrane protein;                            |   |
| TRINITY_DN32661_c0_g1_i1 | -0,517067713 Full=60S ribosomal protein L28;                                                 |   |
| TRINITY_DN11326_c0_g1_i1 | -0,514483974 Full=Glutamine synthetase 2 cytoplasmic;                                        |   |
| TRINITY_DN610_c0_g1_i1   | -0,513229103 Full=Adenylosuccinate lyase;                                                    |   |
| TRINITY_DN18703_c0_g1_i1 | -0,51225499                                                                                  | 0 |
| TRINITY_DN18809_c0_g1_i1 | -0,51112287 Full=Probable enoyl-CoA hydratase, mitochondrial;                                |   |
| TRINITY_DN11645_c0_g1_i1 | -0,510247315 Full=Rhombotin-1;                                                               |   |
| TRINITY_DN12016_c0_g1_i1 | -0,509652184 Full=Host cell factor;                                                          |   |
| TRINITY_DN19311_c0_g1_i1 | -0,50821359 Full=Vacuolar protein sorting-associated protein 35;                             |   |
| TRINITY_DN32455_c0_g1_i1 | -0,508031094 Full=Heat shock 70 kDa protein cognate 4;                                       |   |
| TRINITY_DN19196_c0_g1_i1 | -0,506565279 Full=60S ribosomal protein L18a;                                                |   |
| TRINITY_DN18648_c0_g1_i1 | -0,505654089 Full=V-set and transmembrane domain-containing protein 2B;                      |   |
| TRINITY_DN906_c0_g1_i1   | -0,504336363                                                                                 | 0 |
| TRINITY_DN12550_c0_g1_i1 | -0,502289526 Full=Ethanolamine-phosphate phospho-lyase;                                      |   |
| TRINITY_DN5449_c0_g1_i1  | -0,501874144 Full=Serine protease snake;                                                     |   |
| TRINITY_DN11812_c0_g1_i1 | -0,501188592 Full=RNA 3'-terminal phosphate cyclase;                                         |   |
| TRINITY_DN10742_c0_g1_i1 | -0,501004947 Full=60S ribosomal protein L3;                                                  |   |
| TRINITY_DN12925_c0_g1_i1 | -0,500695828 Full=Bcl-2-related ovarian killer protein;                                      |   |
| TRINITY_DN4767_c0_g1_i1  | -0,499124677 Full=Venom carboxylesterase-6;                                                  |   |
| TRINITY_DN12725_c0_g1_i1 | -0,498412646                                                                                 | 0 |
| TRINITY_DN19062_c0_g1_i1 | -0,494670295 Full=60S ribosomal protein L7a;                                                 |   |
| TRINITY_DN4432_c0_g1_i1  | -0,492404542 Full=Membrane-associated progesterone receptor component 2;                     |   |
| TRINITY_DN18937_c0_g1_i1 | -0,492312932 Full=Lysosomal Pro-X carboxypeptidase;                                          |   |
| TRINITY_DN19077_c0_g1_i1 | -0,49174552 Full=Activating transcription factor of chaperone {ECO:0000303 PubMed:15530439}; |   |
| TRINITY_DN1204_c0_g1_i1  | -0,489404015 Full=Tyrosine-protein kinase PR2;                                               |   |
| TRINITY_DN18850_c0_g1_i1 | -0,489376967 Full=Ubiquitin carboxyl-terminal hydrolase 20;                                  |   |
| TRINITY_DN11667_c0_g1_i1 | -0,488245531 Full=Testin;                                                                    |   |
| TRINITY_DN355_c0_g1_i1   | -0,487331307 Full=Leucine-rich repeat-containing protein 20;                                 |   |
| TRINITY_DN238_c0_g1_i1   | -0,485767349 Full=Carboxypeptidase N subunit 2;                                              |   |
| TRINITY_DN11501_c0_g1_i1 | -0,485558515 Full=Conserved oligomeric Golgi complex subunit 8;                              |   |

|                          |                                                                                           |   |
|--------------------------|-------------------------------------------------------------------------------------------|---|
| TRINITY_DN11514_c0_g1_i1 | -0,485066594 Full=Cytochrome c oxidase subunit 5A, mitochondrial;                         |   |
| TRINITY_DN4762_c0_g1_i1  | -0,484735231 Full=40S ribosomal protein S3;                                               |   |
| TRINITY_DN526_c0_g1_i1   | -0,484719641                                                                              | 0 |
| TRINITY_DN20206_c0_g1_i1 | -0,484662453 Full=Glutamate receptor ionotropic, NMDA 2D;                                 |   |
| TRINITY_DN4688_c0_g1_i1  | -0,48365764 Full=BAG domain-containing protein Samui;                                     |   |
| TRINITY_DN12570_c0_g1_i1 | -0,482547359 Full=Glycogen-binding subunit 76A;                                           |   |
| TRINITY_DN746_c0_g1_i1   | -0,48127912 Full=COP9 signalosome complex subunit 3;                                      |   |
| TRINITY_DN18857_c0_g1_i1 | -0,481120284 Full=Mitogen-activated protein kinase kinase kinase 7;                       |   |
| TRINITY_DN32289_c0_g1_i1 | -0,480892517 Full=60S ribosomal protein L10;                                              |   |
| TRINITY_DN1400_c0_g1_i1  | -0,480642385 Full=Stress-induced-phosphoprotein 1;                                        |   |
| TRINITY_DN491_c0_g1_i1   | -0,480149374 Full=Probable medium-chain specific acyl-CoA dehydrogenase, mitochondrial;   |   |
| TRINITY_DN5023_c0_g1_i1  | -0,479876199 Full=Thioredoxin reductase 1, mitochondrial;                                 |   |
| TRINITY_DN11500_c0_g1_i1 | -0,478612479 Full=Protein c-ets-1-B;                                                      |   |
| TRINITY_DN32336_c0_g1_i1 | -0,478158291 Full=Cytochrome c oxidase subunit 7A1, mitochondrial;                        |   |
| TRINITY_DN7124_c0_g1_i1  | -0,472718135                                                                              | 0 |
| TRINITY_DN10754_c0_g1_i1 | -0,470576609 Full=NAD(P)H-hydrate epimerase {ECO:0000255 HAMAP-Rule:MF_03159};            |   |
| TRINITY_DN530_c0_g1_i1   | -0,469658361 Full=60S acidic ribosomal protein P0;                                        |   |
| TRINITY_DN19689_c0_g1_i1 | -0,469572267                                                                              | 0 |
| TRINITY_DN21252_c0_g1_i1 | -0,466463901                                                                              | 0 |
| TRINITY_DN5363_c0_g1_i1  | -0,465627185 Full=Alcohol dehydrogenase class-3;                                          |   |
| TRINITY_DN4797_c0_g1_i1  | -0,463930471 Full=Ubiquitin-like protein 4A;                                              |   |
| TRINITY_DN765_c0_g1_i1   | -0,462740185 Full=NADH dehydrogenase [ubiquinone] flavoprotein 2, mitochondrial;          |   |
| TRINITY_DN6237_c0_g1_i1  | -0,462681852 Full=Lipoma-preferred partner homolog;                                       |   |
| TRINITY_DN11036_c0_g1_i1 | -0,460893015 Full=28S ribosomal protein S7, mitochondrial;                                |   |
| TRINITY_DN18718_c0_g1_i1 | -0,456443313                                                                              | 0 |
| TRINITY_DN570_c0_g1_i1   | -0,455804816 Full=Facilitated trehalose transporter Tret1 {ECO:0000250 UniProtKB:Q7PIR5}; |   |
| TRINITY_DN10714_c0_g1_i1 | -0,455440271 Full=Pyruvate dehydrogenase E1 component subunit beta, mitochondrial;        |   |
| TRINITY_DN6293_c0_g1_i1  | -0,455439841                                                                              | 0 |
| TRINITY_DN11607_c0_g1_i1 | -0,455143961 Full=Peptide chain release factor 1-like, mitochondrial;                     |   |
| TRINITY_DN18789_c0_g1_i1 | -0,454929382 Full=Elongation factor 1-alpha;                                              |   |

|                          |                                                                                                                                              |   |
|--------------------------|----------------------------------------------------------------------------------------------------------------------------------------------|---|
| TRINITY_DN33016_c0_g1_i1 | -0,454589303 Full=60S ribosomal protein L23a;                                                                                                |   |
| TRINITY_DN160_c0_g1_i1   | -0,454386557 Full=Hydroxymethylglutaryl-CoA lyase, mitochondrial;                                                                            |   |
| TRINITY_DN3739_c0_g1_i1  | -0,45433336 Full=Peptidyl-prolyl cis-trans isomerase 5;                                                                                      |   |
| TRINITY_DN7095_c0_g1_i1  | -0,45338117 Full=Eukaryotic translation initiation factor 3 subunit H {ECO:0000255 HAMAP-Rule:MF_03007};                                     |   |
| TRINITY_DN19022_c0_g1_i1 | -0,452437409 Full=Zinc finger protein 32;                                                                                                    |   |
| TRINITY_DN5826_c0_g1_i1  | -0,451659613                                                                                                                                 | 0 |
| TRINITY_DN19110_c0_g1_i1 | -0,451337952 Full=28S ribosomal protein S18a, mitochondrial;                                                                                 |   |
| TRINITY_DN10845_c0_g1_i1 | -0,449392474 Full=ATP-dependent RNA helicase p62;                                                                                            |   |
| TRINITY_DN5428_c0_g1_i1  | -0,449191979 Full=Kinesin heavy chain;                                                                                                       |   |
| TRINITY_DN19886_c0_g1_i1 | -0,448882472 Full=40S ribosomal protein S7;                                                                                                  |   |
| TRINITY_DN5026_c0_g1_i1  | -0,446094891 Full=Short-chain specific acyl-CoA dehydrogenase, mitochondrial;                                                                |   |
| TRINITY_DN18742_c0_g1_i1 | -0,444655257 Full=Krueppel homolog 1;                                                                                                        |   |
| TRINITY_DN250_c0_g1_i1   | -0,444623922 Full=Lipoyltransferase 1, mitochondrial;                                                                                        |   |
| TRINITY_DN5235_c0_g1_i1  | -0,444184685 Full=Protein lifeguard 4;                                                                                                       |   |
| TRINITY_DN32363_c0_g1_i1 | -0,44405143                                                                                                                                  | 0 |
| TRINITY_DN11575_c0_g1_i1 | -0,443539024 Full=Myosin heavy chain, muscle;                                                                                                |   |
| TRINITY_DN4041_c0_g1_i1  | -0,443441946 Full=Proline-5-carboxylate reductase;                                                                                           |   |
| TRINITY_DN10074_c0_g1_i1 | -0,442590366 Full=Elongation of very long chain fatty acids protein AAEL008004;                                                              |   |
| TRINITY_DN10879_c0_g1_i1 | -0,44213988 Full=Bestrophin-4;                                                                                                               |   |
| TRINITY_DN19131_c0_g1_i1 | -0,441049804 Full=3-ketoacyl-CoA thiolase, mitochondrial;                                                                                    |   |
| TRINITY_DN23992_c0_g1_i1 | -0,440071193 Full=Protein FAM151B;                                                                                                           |   |
| TRINITY_DN398_c0_g1_i1   | -0,440046354 Full=Abl interactor 2;                                                                                                          |   |
| TRINITY_DN11615_c0_g1_i1 | -0,438811733 Full=Ribosome biogenesis protein NSA2 homolog;                                                                                  |   |
| TRINITY_DN4764_c0_g1_i1  | -0,438381503 Full=Protein extra-macrochaetae;<br>Full=Tyrosine-protein kinase transforming protein ros;^Viruses; Retro-transcribing viruses; |   |
| TRINITY_DN1966_c0_g1_i1  | -0,436785446 Retroviridae; Orthoretrovirinae; Alpharetrovirus                                                                                |   |
| TRINITY_DN5324_c0_g1_i1  | -0,43609038 Full=60S ribosomal protein L12;                                                                                                  |   |
| TRINITY_DN18887_c0_g1_i1 | -0,435608521                                                                                                                                 | 0 |
| TRINITY_DN32616_c0_g1_i1 | -0,435547636 Full=Aminopeptidase N;                                                                                                          |   |
| TRINITY_DN10727_c0_g1_i1 | -0,435244052 Full=Uncharacterized protein CG1785;                                                                                            |   |
| TRINITY_DN18628_c0_g1_i1 | -0,434727603 Full=ATP synthase subunit d, mitochondrial;                                                                                     |   |

|                          |                                                                                                     |   |
|--------------------------|-----------------------------------------------------------------------------------------------------|---|
| TRINITY_DN11177_c0_g1_i1 | -0,432503885 Full=S-phase kinase-associated protein 1;                                              |   |
| TRINITY_DN22569_c0_g1_i1 | -0,432304874 Full=Transmembrane protein 147;                                                        |   |
| TRINITY_DN5397_c0_g1_i1  | -0,431763188 Full=3-hydroxy-3-methylglutaryl-coenzyme A reductase;                                  |   |
| TRINITY_DN11541_c0_g1_i1 | -0,430938072                                                                                        | 0 |
| TRINITY_DN10730_c0_g1_i1 | -0,430555727 Full=Transcription factor AP-1;                                                        |   |
| TRINITY_DN32304_c0_g1_i1 | -0,429186146 Full=60S ribosomal protein L18;                                                        |   |
| TRINITY_DN5577_c0_g1_i1  | -0,428680369 Full=Protein tipE;                                                                     |   |
| TRINITY_DN7551_c0_g1_i1  | -0,426716444                                                                                        | 0 |
| TRINITY_DN21473_c0_g1_i1 | -0,426659862 Full=40S ribosomal protein S23;                                                        |   |
| TRINITY_DN10786_c0_g1_i1 | -0,425873968 Full=Eukaryotic translation initiation factor 2 subunit 3;                             |   |
| TRINITY_DN10744_c0_g1_i1 | -0,424784661 Full=Selenide, water dikinase;                                                         |   |
| TRINITY_DN19374_c0_g1_i1 | -0,424755745 Full=MAP kinase-interacting serine/threonine-protein kinase 1;                         |   |
| TRINITY_DN8740_c0_g1_i1  | -0,423014691 Full=60S ribosomal protein L17;                                                        |   |
| TRINITY_DN712_c0_g1_i1   | -0,422023024 Full=Mitochondrial-processing peptidase subunit beta;                                  |   |
| TRINITY_DN4722_c0_g1_i1  | -0,421786359 Full=Dynein heavy chain, cytoplasmic;                                                  |   |
| TRINITY_DN11173_c0_g1_i1 | -0,421094771 Full=Diuretic hormone 45;                                                              |   |
| TRINITY_DN10699_c0_g1_i1 | -0,420281673 Full=Annexin B11;                                                                      |   |
| TRINITY_DN11697_c0_g1_i1 | -0,420055368                                                                                        | 0 |
| TRINITY_DN1200_c0_g1_i1  | -0,41950649 Full=COP9 signalosome complex subunit 1;                                                |   |
| TRINITY_DN12297_c0_g1_i1 | -0,419453489                                                                                        | 0 |
| TRINITY_DN5383_c0_g1_i1  | -0,417809864 Full=Ubiquitin-conjugating enzyme E2 N;                                                |   |
| TRINITY_DN5088_c0_g1_i1  | -0,416569111 Full=Dystrophin, isoform D {ECO:0000303 PubMed:10731132, ECO:0000303 PubMed:17543506}; |   |
| TRINITY_DN5006_c0_g1_i1  | -0,415876872 Full=Suppressor of lurcher protein 1;                                                  |   |
| TRINITY_DN1291_c0_g1_i1  | -0,415652214 Full=Protein Dr1;                                                                      |   |
| TRINITY_DN228_c0_g1_i1   | -0,415222957 Full=Stomatin-like protein 2, mitochondrial;                                           |   |
| TRINITY_DN773_c0_g1_i1   | -0,413314698 Full=DNA polymerase iota;                                                              |   |
| TRINITY_DN10908_c0_g1_i1 | -0,412739157 Full=Protein canopy homolog 3;                                                         |   |
| TRINITY_DN11062_c0_g1_i1 | -0,41203697 Full=Polymerase delta-interacting protein 2;                                            |   |
| TRINITY_DN5117_c0_g1_i1  | -0,411484634 Full=Secretory carrier-associated membrane protein 1;                                  |   |
| TRINITY_DN5073_c0_g1_i1  | -0,410917473 Full=CCR4-NOT transcription complex subunit 7;                                         |   |

|                          |              |                                                                                     |   |
|--------------------------|--------------|-------------------------------------------------------------------------------------|---|
| TRINITY_DN10940_c0_g1_i1 | -0,41052848  | Full=Proteasome subunit beta type-7;                                                |   |
| TRINITY_DN6277_c0_g1_i1  | -0,40900877  | Full=Sodium-coupled monocarboxylate transporter 2;                                  |   |
| TRINITY_DN8206_c0_g1_i1  | -0,407685261 | Full=Nuclear factor interleukin-3-regulated protein;                                |   |
| TRINITY_DN583_c0_g1_i1   | -0,407388627 | Full=ATP synthase subunit beta, mitochondrial;                                      |   |
| TRINITY_DN6527_c0_g1_i1  | -0,406416114 |                                                                                     | 0 |
| TRINITY_DN18851_c0_g1_i1 | -0,404902859 | Full=Transaldolase;                                                                 |   |
| TRINITY_DN4871_c0_g1_i1  | -0,404633928 | Full=Collagen alpha-1(XI) chain;                                                    |   |
| TRINITY_DN5903_c0_g1_i1  | -0,40365751  | Full=Thioredoxin, mitochondrial;                                                    |   |
| TRINITY_DN11364_c0_g1_i1 | -0,403503037 | Full=Transcription initiation factor TFIID subunit 5;                               |   |
| TRINITY_DN551_c0_g1_i1   | -0,402387583 | Full=Sodium leak channel non-selective protein;                                     |   |
| TRINITY_DN419_c0_g1_i1   | -0,401529504 | Full=Metalloproteinase inhibitor 3;                                                 |   |
| TRINITY_DN6273_c0_g1_i1  | -0,400245269 | Full=60S acidic ribosomal protein P2;                                               |   |
| TRINITY_DN5206_c0_g1_i1  | -0,400023748 | Full=60S ribosomal protein L21;                                                     |   |
| TRINITY_DN4670_c0_g1_i1  | -0,399830397 | Full=DnaJ protein homolog 1;                                                        |   |
| TRINITY_DN33055_c0_g1_i1 | -0,397831278 | Full=Putative ATP synthase subunit f, mitochondrial;                                |   |
| TRINITY_DN780_c0_g1_i1   | -0,397551659 | Full=S-adenosylmethionine synthase;                                                 |   |
| TRINITY_DN1323_c0_g1_i1  | -0,397162867 | Full=Neprilysin-11;                                                                 |   |
| TRINITY_DN11339_c0_g1_i1 | -0,39685869  | Full=Enoyl-CoA hydratase domain-containing protein 2, mitochondrial;                |   |
| TRINITY_DN691_c0_g1_i1   | -0,396160436 | Full=26S proteasome non-ATPase regulatory subunit 14;                               |   |
| TRINITY_DN1393_c0_g1_i1  | -0,395604968 | Full=Facilitated trehalose transporter Tret1 {ECO:0000250 UniProtKB:Q7PIR5};        |   |
| TRINITY_DN5565_c0_g1_i1  | -0,39488434  | Full=Mitochondrial import receptor subunit TOM20 homolog;                           |   |
| TRINITY_DN32525_c0_g1_i1 | -0,393080873 | Full=60S ribosomal protein L13;                                                     |   |
| TRINITY_DN5119_c0_g1_i1  | -0,39281959  | Full=ATP-dependent RNA helicase p62;                                                |   |
| TRINITY_DN18811_c0_g1_i1 | -0,392245205 | Full=Stathmin-4;                                                                    |   |
| TRINITY_DN5379_c0_g1_i1  | -0,392146325 | Full=ATP synthase mitochondrial F1 complex assembly factor 2;                       |   |
| TRINITY_DN5730_c0_g1_i1  | -0,391161417 |                                                                                     | 0 |
| TRINITY_DN4915_c0_g1_i1  | -0,38996348  | Full=Protein slit;                                                                  |   |
| TRINITY_DN18800_c0_g1_i1 | -0,389314162 | Full=Probable aconitate hydratase, mitochondrial;                                   |   |
| TRINITY_DN1639_c0_g1_i1  | -0,388274822 |                                                                                     | 0 |
| TRINITY_DN108_c0_g1_i1   | -0,387984226 | Full=Interferon-inducible double-stranded RNA-dependent protein kinase activator A; |   |

|                          |                                                                                                                                                               |   |
|--------------------------|---------------------------------------------------------------------------------------------------------------------------------------------------------------|---|
| TRINITY_DN5034_c0_g1_i1  | -0,387325876 Full=ATP-binding cassette sub-family E member 1;                                                                                                 |   |
| TRINITY_DN9224_c0_g1_i1  | -0,387249887 Full=Cathepsin L;                                                                                                                                |   |
| TRINITY_DN18844_c0_g1_i1 | -0,386774969 Full=Ubiquitin-conjugating enzyme E2 Q1;                                                                                                         |   |
| TRINITY_DN342_c0_g1_i1   | -0,3859353 Full=HIG1 domain family member 1A, mitochondrial;                                                                                                  |   |
| TRINITY_DN11493_c0_g1_i1 | -0,385930451 Full=Electron transfer flavoprotein subunit beta {ECO:0000305};                                                                                  |   |
| TRINITY_DN18961_c0_g1_i1 | -0,385502645 Full=60S ribosomal protein L5;                                                                                                                   |   |
| TRINITY_DN18632_c0_g1_i1 | -0,383475169 Full=ATP synthase subunit gamma, mitochondrial;                                                                                                  |   |
| TRINITY_DN18649_c0_g1_i1 | -0,382825748 Full=Arginine--tRNA ligase, cytoplasmic;<br>Full=Leucine-rich repeat and immunoglobulin-like domain-containing nogo receptor-interacting protein |   |
| TRINITY_DN12067_c0_g1_i1 | -0,382525085 2;                                                                                                                                               |   |
| TRINITY_DN18711_c0_g1_i1 | -0,382103606 Full=Serine/threonine-protein kinase mig-15;                                                                                                     |   |
| TRINITY_DN5076_c0_g1_i1  | -0,381273393 Full=2-oxoglutarate and iron-dependent oxygenase domain-containing protein 3;                                                                    |   |
| TRINITY_DN5183_c0_g1_i1  | -0,381174185 Full=Superoxide dismutase [Mn], mitochondrial;                                                                                                   |   |
| TRINITY_DN11280_c0_g1_i1 | -0,381148037 Full=Ets DNA-binding protein pokkuri;                                                                                                            |   |
| TRINITY_DN333_c0_g1_i1   | -0,38099708 Full=Hepatocyte growth factor-regulated tyrosine kinase substrate;                                                                                |   |
| TRINITY_DN6765_c0_g1_i1  | -0,380649268 Full=Diacylglycerol kinase epsilon;                                                                                                              |   |
| TRINITY_DN11022_c0_g1_i1 | -0,379655347 Full=Alpha-endosulfine;                                                                                                                          |   |
| TRINITY_DN1198_c0_g1_i1  | -0,37944265 Full=Sodium/potassium/calcium exchanger 4;                                                                                                        |   |
| TRINITY_DN14888_c0_g1_i1 | -0,379277796                                                                                                                                                  | 0 |
| TRINITY_DN18951_c0_g1_i1 | -0,378911768 Full=Ubiquitin domain-containing protein UBFD1;                                                                                                  |   |
| TRINITY_DN11450_c0_g1_i1 | -0,376428438 Full=Trifunctional enzyme subunit beta, mitochondrial;                                                                                           |   |
| TRINITY_DN487_c0_g1_i1   | -0,376368372                                                                                                                                                  | 0 |
| TRINITY_DN10724_c0_g1_i1 | -0,375682782 Full=Alanine--tRNA ligase, cytoplasmic {ECO:0000255 HAMAP-Rule:MF_03133};                                                                        |   |
| TRINITY_DN18724_c0_g1_i1 | -0,375442274 Full=Cytochrome c1, heme protein, mitochondrial;                                                                                                 |   |
| TRINITY_DN32297_c0_g1_i1 | -0,375225573 Full=Uncharacterized protein CG16817;                                                                                                            |   |
| TRINITY_DN4892_c0_g1_i1  | -0,374213066 Full=Transient receptor potential channel pyrexia;                                                                                               |   |
| TRINITY_DN2569_c0_g1_i1  | -0,373749291                                                                                                                                                  | 0 |
| TRINITY_DN5277_c0_g1_i1  | -0,373472779 Full=Ubiquitin thioesterase otubain-like;                                                                                                        |   |
| TRINITY_DN256_c0_g1_i1   | -0,373373429 Full=Protein NDRG3;                                                                                                                              |   |
| TRINITY_DN964_c0_g1_i1   | -0,370910069 Full=Calcium-transporting ATPase sarcoplasmic/endoplasmic reticulum type;                                                                        |   |

|                          |                                                                                                      |   |
|--------------------------|------------------------------------------------------------------------------------------------------|---|
| TRINITY_DN19363_c0_g1_i1 | -0,37065719 Full=40S ribosomal protein S13;                                                          |   |
| TRINITY_DN5475_c0_g1_i1  | -0,369545228 Full=Sodium-dependent nutrient amino acid transporter 1 {ECO:0000250 UniProtKB:Q9W4C5}; |   |
| TRINITY_DN5399_c0_g1_i1  | -0,368526541 Full=Phospholipid hydroperoxide glutathione peroxidase, mitochondrial;                  |   |
| TRINITY_DN19074_c0_g1_i1 | -0,368151477 Full=ATP synthase subunit O, mitochondrial;                                             |   |
| TRINITY_DN5249_c0_g1_i1  | -0,367932073 Full=Cytochrome c oxidase subunit 5B, mitochondrial {ECO:0000250 UniProtKB:P00428};     |   |
| TRINITY_DN6062_c0_g1_i1  | -0,367917846 Full=28S ribosomal protein S9, mitochondrial;                                           |   |
| TRINITY_DN18659_c0_g1_i1 | -0,367336524 Full=Peroxiredoxin 1;                                                                   |   |
| TRINITY_DN501_c0_g1_i1   | -0,365800496 Full=Armadillo segment polarity protein;                                                |   |
| TRINITY_DN18745_c0_g1_i1 | -0,365441424 Full=NADH dehydrogenase [ubiquinone] 1 alpha subcomplex subunit 11;                     |   |
| TRINITY_DN5573_c0_g1_i1  | -0,365235531                                                                                         | 0 |
| TRINITY_DN11851_c0_g1_i1 | -0,364921058 Full=Riboflavin kinase;                                                                 |   |
| TRINITY_DN7380_c0_g1_i1  | -0,364699932 Full=Myosin-2 essential light chain;                                                    |   |
| TRINITY_DN19322_c0_g1_i1 | -0,36310522 Full=V-type proton ATPase 16 kDa proteolipid subunit;                                    |   |
| TRINITY_DN11599_c0_g1_i1 | -0,36291118 Full=Eukaryotic translation initiation factor 4E;                                        |   |
| TRINITY_DN5238_c0_g1_i1  | -0,362572889 Full=Cysteine synthase;                                                                 |   |
| TRINITY_DN18640_c0_g1_i1 | -0,361075166                                                                                         | 0 |
| TRINITY_DN13345_c0_g1_i1 | -0,359852593 Full=60S ribosomal protein L19;                                                         |   |
| TRINITY_DN19014_c0_g1_i1 | -0,357928804 Full=60S ribosomal protein L13a;                                                        |   |
| TRINITY_DN10706_c0_g1_i1 | -0,357659262 Full=Cytochrome b-c1 complex subunit 2, mitochondrial;                                  |   |
| TRINITY_DN617_c0_g1_i1   | -0,355885684 Full=Sperm-associated antigen 6;                                                        |   |
| TRINITY_DN19500_c0_g1_i1 | -0,355420447                                                                                         | 0 |
| TRINITY_DN12102_c0_g1_i1 | -0,35526847 Full=Phosphate carrier protein, mitochondrial;                                           |   |
| TRINITY_DN19958_c0_g1_i1 | -0,354756377 Full=40S ribosomal protein S24;                                                         |   |
| TRINITY_DN13247_c0_g1_i1 | -0,352688305 Full=60S ribosomal protein L11;                                                         |   |
| TRINITY_DN2383_c0_g1_i1  | -0,352163576                                                                                         | 0 |
| TRINITY_DN5211_c0_g1_i1  | -0,352012089 Full=Histone H3.3;                                                                      |   |
| TRINITY_DN5499_c0_g1_i1  | -0,351348658                                                                                         | 0 |
| TRINITY_DN284_c0_g1_i1   | -0,351190151 Full=Enolase;                                                                           |   |
| TRINITY_DN32291_c0_g1_i1 | -0,35107417 Full=27 kDa hemolymph protein;                                                           |   |
| TRINITY_DN4625_c0_g1_i1  | -0,35093626 Full=Cytochrome P450 CYP12A2;                                                            |   |



|                          |                                                                                                     |   |
|--------------------------|-----------------------------------------------------------------------------------------------------|---|
| TRINITY_DN21547_c0_g1_i1 | -0,34931163 Full=Actin, cytoplasmic A3a;                                                            |   |
| TRINITY_DN9151_c0_g1_i1  | -0,349067301                                                                                        | 0 |
| TRINITY_DN5668_c0_g1_i1  | -0,34752191 Full=Nucleoplasmin-like protein;                                                        |   |
| TRINITY_DN10827_c0_g1_i1 | -0,346416112 Full=Glutamate dehydrogenase, mitochondrial;                                           |   |
| TRINITY_DN5287_c0_g1_i1  | -0,344953031 Full=Beta-ureidopropionase;                                                            |   |
| TRINITY_DN11026_c0_g1_i1 | -0,344437554                                                                                        | 0 |
| TRINITY_DN5812_c0_g1_i1  | -0,343826774 Full=40S ribosomal protein S5;                                                         |   |
| TRINITY_DN5062_c0_g1_i1  | -0,343458248 Full=Proteasome subunit beta type-1;                                                   |   |
| TRINITY_DN18687_c0_g1_i1 | -0,342796286 Full=Probable malate dehydrogenase, mitochondrial;                                     |   |
| TRINITY_DN486_c0_g1_i1   | -0,341372303 Full=Probable isocitrate dehydrogenase [NAD] subunit alpha, mitochondrial;             |   |
| TRINITY_DN19750_c0_g1_i1 | -0,341169504 Full=40S ribosomal protein S10;                                                        |   |
| TRINITY_DN395_c0_g1_i1   | -0,340901983 Full=Sorting nexin Ist-4 {ECO:0000250 UniProtKB:Q8WV41};                               |   |
| TRINITY_DN908_c0_g1_i1   | -0,340370135 Full=Protein lev-9;                                                                    |   |
| TRINITY_DN11252_c0_g1_i1 | -0,339152738 Full=S-adenosylmethionine decarboxylase proenzyme;                                     |   |
| TRINITY_DN32821_c0_g1_i1 | -0,338791043 Full=60S ribosomal protein L37a;                                                       |   |
| TRINITY_DN18685_c0_g1_i1 | -0,337841481 Full=Pyruvate kinase;                                                                  |   |
| TRINITY_DN11490_c0_g1_i1 | -0,336281412 Full=Mobility group protein 1A;                                                        |   |
| TRINITY_DN10930_c0_g1_i1 | -0,335452322 Full=Isocitrate dehydrogenase [NADP], mitochondrial;                                   |   |
| TRINITY_DN10700_c0_g1_i1 | -0,334567972 Full=Maltase A2;                                                                       |   |
| TRINITY_DN131_c0_g1_i1   | -0,334348094 Full=Protein disulfide-isomerase;                                                      |   |
| TRINITY_DN18889_c0_g1_i1 | -0,332426424 Full=Immunoglobulin domain-containing protein oig-1 {ECO:0000305};                     |   |
| TRINITY_DN147_c0_g1_i1   | -0,331629067 Full=Trifunctional enzyme subunit alpha, mitochondrial;                                |   |
| TRINITY_DN18763_c0_g1_i1 | -0,331397397 Full=NADH dehydrogenase [ubiquinone] iron-sulfur protein 7, mitochondrial;             |   |
| TRINITY_DN5332_c0_g1_i1  | -0,330414391 Full=Serine/threonine-protein phosphatase 2A 56 kDa regulatory subunit delta isoform;  |   |
| TRINITY_DN6190_c0_g1_i1  | -0,330205768 Full=Ras-related protein Rap-1b;                                                       |   |
| TRINITY_DN4631_c0_g1_i1  | -0,32919844 Full=26S proteasome non-ATPase regulatory subunit 11;                                   |   |
| TRINITY_DN10721_c0_g1_i1 | -0,327725965 Full=Transmembrane emp24 domain-containing protein bai {ECO:0000250 UniProtKB:Q9I7K5}; |   |
| TRINITY_DN16948_c0_g1_i1 | -0,326138515 Full=RNA-binding protein Rsf1;                                                         |   |
| TRINITY_DN20_c0_g1_i1    | -0,325719402                                                                                        | 0 |

|                          |              |                                                                             |   |
|--------------------------|--------------|-----------------------------------------------------------------------------|---|
| TRINITY_DN32940_c0_g1_i1 | -0,325152225 | Full=60S ribosomal protein L9;                                              |   |
| TRINITY_DN482_c0_g1_i1   | -0,323971699 | Full=Guanine nucleotide-binding protein subunit beta-like protein;          |   |
| TRINITY_DN19960_c0_g1_i1 | -0,323298762 | Full=NADH dehydrogenase [ubiquinone] 1 beta subcomplex subunit 9;           |   |
| TRINITY_DN11056_c0_g1_i1 | -0,321641873 | Full=Putative neuropeptide precursor protein {ECO:0000303 PubMed:19540422}; |   |
| TRINITY_DN4634_c0_g1_i1  | -0,320549057 |                                                                             | 0 |
| TRINITY_DN32446_c0_g1_i1 | -0,319529305 | Full=60S ribosomal protein L44;                                             |   |
| TRINITY_DN5519_c0_g1_i1  | -0,316133109 | Full=2-hydroxyacyl-CoA lyase 1;                                             |   |
| TRINITY_DN285_c0_g1_i1   | -0,315226663 | Full=Ras-related protein Rab-1A;                                            |   |
| TRINITY_DN665_c0_g1_i1   | -0,314911289 | Full=Microtubule-associated protein RP/EB family member 3;                  |   |
| TRINITY_DN11320_c0_g1_i1 | -0,313715815 | Full=Protein lethal(2)essential for life;                                   |   |
| TRINITY_DN392_c0_g1_i1   | -0,306464752 | Full=Sodium- and chloride-dependent GABA transporter ine;                   |   |
| TRINITY_DN807_c0_g1_i1   | -0,306115214 | Full=BTB/POZ domain-containing protein KCTD16;                              |   |
| TRINITY_DN38750_c0_g1_i1 | -0,305934884 | Full=60S ribosomal protein L35;                                             |   |
| TRINITY_DN4729_c0_g1_i1  | -0,304511457 | Full=Eukaryotic initiation factor 4A;                                       |   |
