# Supplementary material for: Sublethal Exposure Effects of the Neonicotinoid Clothianidin Strongly Modify the Brain Transcriptome and Proteome in the Male Moth Agrotis ipsilon
Source: MDPI journal article supplement (doi:10.3390/insects12020152), 2021-02-11
Supplement: s1 [file s1]

|           |      | CTRL / DMSO |       | CTRL / Clothia |       | Clothia / DMSO |       |                                                                                                        |              |                  |                                                                                | Average Normalised Volumes |         |       |                          |
|-----------|------|-------------|-------|----------------|-------|----------------|-------|--------------------------------------------------------------------------------------------------------|--------------|------------------|--------------------------------------------------------------------------------|----------------------------|---------|-------|--------------------------|
| Spot name | Rank | Anova (p)   | Ratio | Anova (p)      | Ratio | Anova (p)      | Ratio | Protein Description                                                                                    | Nb Uniq Pept | UniProt ID       | UniProt Description                                                            | CTRL                       | Clothia | DMSO  | % variation Clothia/DMSO |
| eID: 0001 | 1    | 0,89033536  | 0,997 | 0,61926        | 0,985 | 0,61082347     | 1,012 |                                                                                                        |              |                  |                                                                                | 1,075                      | 1,091   | 1,078 | 1,2059                   |
| eID: 0002 | 2    | 0,4436591   | 1,039 | 0,08824        | 1,081 | 0,43050151     | 0,961 |                                                                                                        |              |                  |                                                                                | 1,018                      | 0,942   | 0,98  | -3,8776                  |
| eID: 0003 | 3    | 0,63375904  | 1,211 | 0,01376        | 3,223 | 0,02688683     | 0,376 | Agrotis_qualite_rep_c519 ORF3 length 394 aa, 1185 bp, from 77..1261 of                                 | 7            | A5A7A5_BO MMO    | Farnesyl diphosphate synthase 2 (Bombyx mori)                                  | 1,199                      | 0,372   | 0,99  | -62,4242                 |
|           |      |             |       |                |       |                |       | Agrotis_qualite_rep_c6539 ORF3 length 373 aa, 1122 bp, from complement(168..1289) of                   | 8            | S4P4A7_9N EOP    | Dimeric dihydrodiol dehydrogenase Pararge aegeria (specked wood butterfly)     | 1,199                      | 0,372   | 0,99  | -62,4242                 |
|           |      |             |       |                |       |                |       | Agrotis_qualite_c15729 ORF8 length 374 aa, 1125 bp, from 219..1343 of Agrotis_qualite_c15729           | 7            | A0A068FL83_AGRSE | 3-hydroxyisobutyryl-CoA hydrolase, mitochondrial Agrotis segetum (Turnip moth) | 1,199                      | 0,372   | 0,99  | -62,4242                 |
|           |      |             |       |                |       |                |       | Agrotis_qualite_rep_c14255 ORF4 length 436 aa, 1311 bp, from 140..1450 of                              | 6            |                  |                                                                                | 1,199                      | 0,372   | 0,99  | -62,4242                 |
|           |      |             |       |                |       |                |       | Agrotis_qualite_c15383 ORF2 length 389 aa, 1170 bp, from complement(1..1170) of Agrotis_qualite_c15383 | 3            |                  |                                                                                | 1,199                      | 0,372   | 0,99  | -62,4242                 |
|           |      |             |       |                |       |                |       | Agrotis_qualite_rep_c15638 ORF10 length 275 aa, 828 bp, from 402..1229 of                              | 3            |                  |                                                                                | 1,199                      | 0,372   | 0,99  | -62,4242                 |
|           |      |             |       |                |       |                |       | Agrotis_qualite_rep_c140 ORF19 length 340 aa, 1023 bp, from complement(773..1795) of                   | 2            |                  |                                                                                | 1,199                      | 0,372   | 0,99  | -62,4242                 |
|           |      |             |       |                |       |                |       | Agrotis_qualite_rep_c317 ORF5 length 381 aa, 1146 bp, from 3..1148 of                                  | 2            |                  |                                                                                | 1,199                      | 0,372   | 0,99  | -62,4242                 |
| eID: 0004 | 4    | 0,60003412  | 0,976 | 0,64722        | 0,974 | 0,9814176      | 1,002 |                                                                                                        |              |                  |                                                                                | 1,077                      | 1,106   | 1,104 | 0,1812                   |
| eID: 0005 | 5    | 0,35262616  | 1,199 | 0,01678        | 1,679 | 0,30450237     | 0,714 |                                                                                                        |              |                  |                                                                                | 1,261                      | 0,751   | 1,052 | -28,6122                 |
| eID: 0006 | 6    | 0,21746936  | 0,884 | 0,27553        | 0,661 | 0,4274693      | 1,337 |                                                                                                        |              |                  |                                                                                | 0,854                      | 1,292   | 0,966 | 33,7474                  |

|           |    |            |       |          |       |            |       |                                                                                                                   |    |                    |                                                                                     |       |       |       |          |
|-----------|----|------------|-------|----------|-------|------------|-------|-------------------------------------------------------------------------------------------------------------------|----|--------------------|-------------------------------------------------------------------------------------|-------|-------|-------|----------|
| eID: 0007 | 7  | 0,03462989 | 0,699 | 0,00115  | 0,556 | 0,07443111 | 1,257 |                                                                                                                   |    |                    |                                                                                     | 0,716 | 1,287 | 1,024 | 25,6836  |
| eID: 0008 | 8  | 0,23221473 | 1,132 | 0,30712  | 1,168 | 0,67088282 | 0,969 |                                                                                                                   |    |                    |                                                                                     | 1,203 | 1,030 | 1,063 | -3,1044  |
| eID: 0010 | 9  | 0,32317202 | 1,165 | 0,09909  | 0,773 | 0,02792942 | 1,508 |                                                                                                                   |    |                    |                                                                                     | 1,124 | 1,455 | 0,965 | 50,7772  |
| eID: 0011 | 10 | 0,48670689 | 0,919 | 0,00474  | 0,679 | 0,02562287 | 1,353 |                                                                                                                   |    |                    |                                                                                     | 1,000 | 1,472 | 1,088 | 35,2941  |
| eID: 0015 | 11 | 0,5989982  | 1,057 | 0,02193  | 1,585 | 0,03780286 | 0,667 | Agrotis_qualite_rep_c28604 <br>ORF3 length 250 aa, 753 bp,<br>from 71..823 of                                     | 2  | NP_00129<br>9400.1 | ATP synthase subunit b,<br>mitochondrial [Papilio<br>xuthus]                        | 1,225 | 0,773 | 1,159 | -33,3046 |
| eID: 0016 | 12 | 0,03619917 | 0,783 | 0,782    | 1,021 | 0,06501924 | 0,767 |                                                                                                                   |    |                    |                                                                                     | 0,922 | 0,903 | 1,178 | -23,3447 |
| eID: 0017 | 13 | 0,00846806 | 1,358 | 0,09171  | 1,150 | 0,12937819 | 1,181 |                                                                                                                   |    |                    |                                                                                     | 0,982 | 0,854 | 0,723 | 18,1189  |
| eID: 0020 | 14 | 0,02207264 | 0,776 | 0,01386  | 0,713 | 0,33013352 | 1,089 |                                                                                                                   |    |                    |                                                                                     | 0,796 | 1,117 | 1,026 | 8,8694   |
| eID: 0022 | 15 | 0,99089899 | 1,013 | 0,44092  | 1,128 | 0,29903545 | 0,898 |                                                                                                                   |    |                    |                                                                                     | 1,085 | 0,962 | 1,071 | -10,1774 |
| eID: 0024 | 16 | 0,99251586 | 0,997 | 0,72074  | 0,969 | 0,74310694 | 1,029 |                                                                                                                   |    |                    |                                                                                     | 1,059 | 1,093 | 1,062 | 2,9190   |
| eID: 0025 | 17 | 2,23E-01   | 0,923 | 6,88E-05 | 0,791 | 2,83E-02   | 1,167 | Agrotis_qualite_c17211 ORF<br>18 length 470 aa, 1413 bp,<br>from<br>complement(833..2245) of                      | 28 | NDUS1_D<br>ROME    | NADH-ubiquinone<br>oxidoreductase 75 kDa<br>subunit, mitochondrial<br>[Bombyx mori] | 0,988 | 1,249 | 1,070 | 16,7290  |
|           |    |            |       |          |       |            |       | Agrotis_qualite_c17211 ORF<br>9 length 208 aa, 627 bp, from<br>complement(388..1014) of<br>Agrotis_qualite_c17211 | 7  | NDUS1_D<br>ROME    | NADH-ubiquinone<br>oxidoreductase 75 kDa<br>subunit, mitochondrial<br>[Bombyx mori] | 0,988 | 1,249 | 1,070 | 16,7290  |
|           |    |            |       |          |       |            |       | Agrotis_qualite_c12455 ORF<br>29 length 600 aa, 1803 bp,<br>from<br>complement(2027..3829) of                     | 3  | DPYL2_H<br>UMAN    | dihydropyrimidinase<br>isoform X2 [Bombyx mori]                                     | 0,988 | 1,249 | 1,070 | 16,7290  |
|           |    |            |       |          |       |            |       | Agrotis_qualite_rep_c4225 <br>ORF4 length 1058 aa, 3177<br>bp, from 96..3272 of                                   | 3  | APLP_DR<br>OME     | apolipoporphins [Papilio<br>polytes]                                                | 0,988 | 1,249 | 1,070 | 16,7290  |
| eID: 0027 | 18 | 0,09932759 | 1,263 | 0,11693  | 1,194 | 0,60641263 | 1,057 |                                                                                                                   |    |                    |                                                                                     | 1,341 | 1,123 | 1,062 | 5,7439   |
| eID: 0028 | 19 | 0,05039137 | 1,212 | 0,53784  | 1,055 | 0,05286216 | 1,149 |                                                                                                                   |    |                    |                                                                                     | 0,942 | 0,893 | 0,777 | 14,9292  |
| eID: 0029 | 20 | 0,33945971 | 1,072 | 0,85736  | 0,970 | 0,40747064 | 1,105 |                                                                                                                   |    |                    |                                                                                     | 1,034 | 1,066 | 0,965 | 10,4663  |
| eID: 0030 | 21 | 0,01714701 | 1,235 | 0,75559  | 0,964 | 0,02983468 | 1,281 |                                                                                                                   |    |                    |                                                                                     | 1,126 | 1,168 | 0,912 | 28,0702  |
| eID: 0031 | 22 | 0,01949402 | 1,161 | 0,00437  | 1,290 | 0,10345876 | 0,900 |                                                                                                                   |    |                    |                                                                                     | 1,167 | 0,905 | 1,005 | -9,9502  |
| eID: 0032 | 23 | 0,00185864 | 1,157 | 0,11056  | 1,141 | 0,91344361 | 1,014 |                                                                                                                   |    |                    |                                                                                     | 1,276 | 1,118 | 1,103 | 1,3599   |
| eID: 0039 | 24 | 0,14008745 | 0,951 | 0,01556  | 0,863 | 0,04970252 | 1,102 |                                                                                                                   |    |                    |                                                                                     | 0,972 | 1,126 | 1,022 | 10,1761  |
| eID: 0040 | 25 | 0,16036019 | 0,939 | 0,98125  | 1,000 | 0,2144648  | 0,939 |                                                                                                                   |    |                    |                                                                                     | 0,953 | 0,953 | 1,015 | -6,1084  |
| eID: 0042 | 26 | 0,75938199 | 0,985 | 0,15194  | 1,095 | 0,12865699 | 0,899 |                                                                                                                   |    |                    |                                                                                     | 1,021 | 0,932 | 1,037 | -10,1254 |
| eID: 0043 | 27 | 0,21197116 | 0,963 | 0,02747  | 0,919 | 0,02349697 | 1,047 |                                                                                                                   |    |                    |                                                                                     | 1,039 | 1,130 | 1,079 | 4,7266   |
| eID: 0045 | 28 | 0,1738831  | 0,731 | 0,01235  | 0,653 | 0,47882544 | 1,119 |                                                                                                                   |    |                    |                                                                                     | 0,714 | 1,093 | 0,977 | 11,8731  |
| eID: 0047 | 29 | 0,82885811 | 0,941 | 0,18413  | 1,207 | 0,21820327 | 0,780 |                                                                                                                   |    |                    |                                                                                     | 0,999 | 0,828 | 1,062 | -22,0339 |
| eID: 0048 | 30 | 0,01801866 | 0,793 | 0,43841  | 0,768 | 0,84395385 | 1,032 |                                                                                                                   |    |                    |                                                                                     | 1,170 | 1,523 | 1,476 | 3,1843   |

|           |    |            |       |         |       |            |       |  |  |  |  |       |       |       |          |
|-----------|----|------------|-------|---------|-------|------------|-------|--|--|--|--|-------|-------|-------|----------|
| eID: 0049 | 31 | 0,00220013 | 0,781 | 0,24105 | 0,825 | 0,54484252 | 0,947 |  |  |  |  | 1,043 | 1,265 | 1,336 | -5,3144  |
| eID: 0050 | 32 | 0,36532416 | 0,893 | 0,39027 | 0,897 | 0,98831644 | 0,996 |  |  |  |  | 0,854 | 0,952 | 0,956 | -0,4184  |
| eID: 0051 | 33 | 0,69207625 | 1,154 | 0,30042 | 1,718 | 0,55656224 | 0,672 |  |  |  |  | 0,426 | 0,248 | 0,369 | -32,7913 |
| eID: 0052 | 34 | 0,82404497 | 1,147 | 0,21701 | 3,138 | 0,28343448 | 0,366 |  |  |  |  | 0,273 | 0,087 | 0,238 | -63,4454 |
| eID: 0053 | 35 | 0,77923154 | 1,329 | 0,18114 | 3,802 | 0,21010787 | 0,350 |  |  |  |  | 0,327 | 0,086 | 0,246 | -65,0407 |
| eID: 0054 | 36 | 0,68678265 | 1,405 | 0,28098 | 2,800 | 0,44227826 | 0,502 |  |  |  |  | 0,406 | 0,145 | 0,289 | -49,8270 |
| eID: 0055 | 37 | 0,37846961 | 1,397 | 0,03575 | 2,624 | 0,24014557 | 0,532 |  |  |  |  | 0,412 | 0,157 | 0,295 | -46,7797 |
| eID: 0056 | 38 | 0,15204884 | 1,414 | 0,0315  | 1,795 | 0,36069435 | 0,787 |  |  |  |  | 0,632 | 0,352 | 0,447 | -21,2528 |
| eID: 0057 | 39 | 0,42999924 | 0,893 | 0,54996 | 0,382 | 0,63534115 | 2,336 |  |  |  |  | 1,299 | 3,399 | 1,455 | 133,6082 |
| eID: 0058 | 40 | 0,18025057 | 1,529 | 0,05698 | 2,120 | 0,31982216 | 0,721 |  |  |  |  | 1,497 | 0,706 | 0,979 | -27,8856 |
| eID: 0059 | 41 | 0,23564757 | 1,361 | 0,00115 | 2,929 | 0,02473472 | 0,465 |  |  |  |  | 0,697 | 0,238 | 0,512 | -53,5156 |
| eID: 0061 | 42 | 0,04810485 | 1,686 | 0,00319 | 1,927 | 0,78993825 | 0,875 |  |  |  |  | 1,590 | 0,825 | 0,943 | -12,5133 |
| eID: 0062 | 43 | 0,4146107  | 1,134 | 0,07393 | 1,420 | 0,15068624 | 0,799 |  |  |  |  | 0,873 | 0,615 | 0,77  | -20,1299 |
| eID: 0063 | 44 | 0,32943259 | 1,207 | 0,05719 | 1,667 | 0,32123486 | 0,724 |  |  |  |  | 1,080 | 0,648 | 0,895 | -27,5978 |
| eID: 0064 | 45 | 0,34657773 | 1,230 | 0,06018 | 1,579 | 0,12017909 | 0,779 |  |  |  |  | 1,255 | 0,795 | 1,020 | -22,0588 |
| eID: 0066 | 46 | 0,7134144  | 1,051 | 0,44091 | 1,120 | 0,68899033 | 0,938 |  |  |  |  | 1,120 | 1,000 | 1,066 | -6,1914  |
| ID: 0046  | 47 | 0,60254582 | 0,892 | 0,97372 | 0,966 | 0,63965043 | 0,923 |  |  |  |  | 0,604 | 0,625 | 0,677 | -7,6809  |
| ID: 0076  | 48 | 0,82221529 | 1,032 | 0,45814 | 1,156 | 0,52133084 | 0,893 |  |  |  |  | 0,712 | 0,616 | 0,69  | -10,7246 |
| ID: 0080  | 49 | 0,19606268 | 0,824 | 0,02755 | 0,722 | 0,20372408 | 1,141 |  |  |  |  | 0,817 | 1,132 | 0,992 | 14,1129  |
| ID: 0082  | 50 | 0,21999725 | 0,839 | 0,05929 | 0,752 | 0,27069941 | 1,115 |  |  |  |  | 0,81  | 1,077 | 0,966 | 11,4907  |
| ID: 0084  | 51 | 0,21839722 | 0,842 | 0,03766 | 0,670 | 0,15995092 | 1,255 |  |  |  |  | 0,807 | 1,204 | 0,959 | 25,5474  |
| ID: 0085  | 52 | 0,82157554 | 0,986 | 0,60105 | 1,218 | 0,36979223 | 0,809 |  |  |  |  | 0,993 | 0,815 | 1,007 | -19,0665 |
| ID: 0087  | 53 | 0,84378076 | 0,950 | 0,83598 | 1,063 | 0,67318066 | 0,894 |  |  |  |  | 0,982 | 0,924 | 1,034 | -10,6383 |
| ID: 0089  | 54 | 0,99695229 | 1,011 | 0,81891 | 1,056 | 0,79159708 | 0,958 |  |  |  |  | 1,060 | 1,004 | 1,048 | -4,1985  |
| ID: 0090  | 55 | 0,84909171 | 0,929 | 0,79701 | 1,080 | 0,65031895 | 0,861 |  |  |  |  | 1,027 | 0,951 | 1,105 | -13,9367 |
| ID: 0091  | 56 | 0,82576294 | 0,895 | 0,97128 | 0,968 | 0,86163303 | 0,925 |  |  |  |  | 0,933 | 0,964 | 1,042 | -7,4856  |
| ID: 0092  | 57 | 0,91193862 | 0,945 | 0,73737 | 1,115 | 0,65325963 | 0,847 |  |  |  |  | 0,978 | 0,877 | 1,035 | -15,2657 |
| ID: 0093  | 58 | 0,54050852 | 0,838 | 0,84599 | 0,903 | 0,74111953 | 0,928 |  |  |  |  | 0,967 | 1,071 | 1,154 | -7,1924  |
| ID: 0094  | 59 | 0,15543903 | 0,556 | 0,08993 | 0,455 | 0,61199194 | 1,221 |  |  |  |  | 0,568 | 1,247 | 1,021 | 22,1352  |
| ID: 0095  | 60 | 0,06057105 | 0,653 | 0,07267 | 0,668 | 0,94031064 | 0,977 |  |  |  |  | 0,602 | 0,901 | 0,922 | -2,2777  |
| ID: 0097  | 61 | 0,6731135  | 1,104 | 0,38398 | 1,288 | 0,51912498 | 0,857 |  |  |  |  | 1,069 | 0,83  | 0,968 | -14,2562 |
| ID: 0103  | 62 | 0,3853972  | 0,839 | 0,4125  | 0,849 | 0,98177556 | 0,988 |  |  |  |  | 0,948 | 1,116 | 1,130 | -1,2389  |
| ID: 0104  | 63 | 0,34706699 | 1,110 | 0,31983 | 1,156 | 0,76207883 | 0,960 |  |  |  |  | 0,756 | 0,654 | 0,681 | -3,9648  |
| ID: 0105  | 64 | 0,29411215 | 1,130 | 0,12523 | 1,464 | 0,20238853 | 0,772 |  |  |  |  | 0,953 | 0,651 | 0,843 | -22,7758 |
| ID: 0110  | 65 | 0,85310498 | 0,989 | 0,81683 | 0,971 | 0,91965621 | 1,018 |  |  |  |  | 0,983 | 1,012 | 0,994 | 1,8109   |
| ID: 0112  | 66 | 0,81145712 | 0,952 | 0,99326 | 1,027 | 0,77252912 | 0,927 |  |  |  |  | 0,991 | 0,965 | 1,041 | -7,3007  |
| ID: 0113  | 67 | 0,76735672 | 0,950 | 0,81919 | 0,949 | 0,97634352 | 1,001 |  |  |  |  | 0,988 | 1,041 | 1,040 | 0,0962   |
| ID: 0114  | 68 | 0,45551373 | 0,872 | 0,66742 | 0,941 | 0,647126   | 0,926 |  |  |  |  | 0,917 | 0,974 | 1,052 | -7,4144  |
| ID: 0116  | 69 | 0,23831773 | 0,785 | 0,6877  | 0,970 | 0,28381912 | 0,809 |  |  |  |  | 0,877 | 0,904 | 1,117 | -19,0689 |
| ID: 0117  | 70 | 0,16267938 | 0,711 | 0,24467 | 0,829 | 0,52131932 | 0,858 |  |  |  |  | 0,863 | 1,041 | 1,213 | -14,1797 |

|          |     |            |       |         |       |            |       |  |  |  |  |       |       |       |          |
|----------|-----|------------|-------|---------|-------|------------|-------|--|--|--|--|-------|-------|-------|----------|
| ID: 0118 | 71  | 0,90266349 | 1,006 | 0,3587  | 1,082 | 0,35507799 | 0,930 |  |  |  |  | 0,913 | 0,844 | 0,908 | -7,0485  |
| ID: 0119 | 72  | 0,63497491 | 0,970 | 0,93936 | 1,017 | 0,33624695 | 0,955 |  |  |  |  | 0,855 | 0,841 | 0,881 | -4,5403  |
| ID: 0121 | 73  | 0,37972903 | 0,924 | 0,44017 | 0,934 | 0,89701021 | 0,989 |  |  |  |  | 0,861 | 0,922 | 0,932 | -1,0730  |
| ID: 0122 | 74  | 0,35485037 | 0,942 | 0,87508 | 1,013 | 0,28237036 | 0,930 |  |  |  |  | 0,87  | 0,859 | 0,924 | -7,0346  |
| ID: 0123 | 75  | 0,157635   | 0,923 | 0,74245 | 0,977 | 0,35947728 | 0,945 |  |  |  |  | 0,927 | 0,949 | 1,004 | -5,4781  |
| ID: 0125 | 76  | 0,0799507  | 0,822 | 0,38245 | 1,158 | 0,07323137 | 0,709 |  |  |  |  | 0,893 | 0,771 | 1,087 | -29,0708 |
| ID: 0126 | 77  | 0,73279243 | 0,966 | 0,3537  | 0,907 | 0,50178164 | 1,065 |  |  |  |  | 0,958 | 1,056 | 0,992 | 6,4516   |
| ID: 0127 | 78  | 0,39802515 | 0,911 | 0,58435 | 0,947 | 0,75997492 | 0,962 |  |  |  |  | 0,879 | 0,928 | 0,965 | -3,8342  |
| ID: 0128 | 79  | 0,74113375 | 1,038 | 0,31323 | 1,197 | 0,51798272 | 0,867 |  |  |  |  | 0,968 | 0,809 | 0,933 | -13,2905 |
| ID: 0131 | 80  | 0,9347956  | 1,017 | 0,54093 | 0,945 | 0,29300604 | 1,077 |  |  |  |  | 0,89  | 0,942 | 0,875 | 7,6571   |
| ID: 0132 | 81  | 0,7324213  | 1,047 | 0,73702 | 1,051 | 0,9480816  | 0,996 |  |  |  |  | 0,987 | 0,939 | 0,943 | -0,4242  |
| ID: 0133 | 82  | 0,98471048 | 1,010 | 0,94118 | 1,016 | 0,93327156 | 0,995 |  |  |  |  | 0,972 | 0,957 | 0,962 | -0,5198  |
| ID: 0136 | 83  | 0,95874889 | 0,949 | 0,18612 | 1,302 | 0,2389322  | 0,729 |  |  |  |  | 0,974 | 0,748 | 1,026 | -27,0955 |
| ID: 0137 | 84  | 0,68816886 | 0,930 | 0,53115 | 0,935 | 0,92811674 | 0,995 |  |  |  |  | 0,971 | 1,039 | 1,044 | -0,4789  |
| ID: 0139 | 85  | 0,84000239 | 1,012 | 0,62963 | 0,974 | 0,53752246 | 1,038 |  |  |  |  | 1,134 | 1,164 | 1,121 | 3,8359   |
| ID: 0140 | 86  | 0,14922904 | 0,767 | 0,03387 | 0,643 | 0,11111091 | 1,193 |  |  |  |  | 0,795 | 1,236 | 1,036 | 19,3050  |
| ID: 0143 | 87  | 0,52313073 | 1,062 | 0,19345 | 1,317 | 0,28520447 | 0,806 |  |  |  |  | 0,914 | 0,694 | 0,861 | -19,3961 |
| ID: 0144 | 88  | 0,8512961  | 1,009 | 0,80345 | 0,979 | 0,72110328 | 1,031 |  |  |  |  | 1,085 | 1,108 | 1,075 | 3,0698   |
| ID: 0145 | 89  | 0,08744307 | 0,764 | 0,03084 | 0,722 | 0,52152451 | 1,058 |  |  |  |  | 0,814 | 1,128 | 1,066 | 5,8161   |
| ID: 0146 | 90  | 0,64177071 | 0,965 | 0,45186 | 0,942 | 0,64363965 | 1,024 |  |  |  |  | 1,065 | 1,131 | 1,104 | 2,4457   |
| ID: 0147 | 91  | 0,11888826 | 0,812 | 0,04403 | 0,696 | 0,12579877 | 1,167 |  |  |  |  | 0,834 | 1,198 | 1,027 | 16,6504  |
| ID: 0148 | 92  | 0,48458174 | 0,907 | 0,39749 | 0,934 | 0,89551905 | 0,971 |  |  |  |  | 0,752 | 0,805 | 0,829 | -2,8951  |
| ID: 0149 | 93  | 0,85823104 | 1,025 | 0,49924 | 0,935 | 0,30840521 | 1,096 |  |  |  |  | 1,064 | 1,138 | 1,038 | 9,6339   |
| ID: 0150 | 94  | 0,19863799 | 0,835 | 0,03036 | 0,712 | 0,10407947 | 1,174 |  |  |  |  | 0,918 | 1,290 | 1,099 | 17,3794  |
| ID: 0151 | 95  | 0,33537066 | 0,917 | 0,1851  | 0,844 | 0,41422491 | 1,086 |  |  |  |  | 0,933 | 1,106 | 1,018 | 8,6444   |
| ID: 0152 | 96  | 0,99725227 | 1,027 | 0,76794 | 0,970 | 0,54734701 | 1,059 |  |  |  |  | 1,030 | 1,062 | 1,003 | 5,8824   |
| ID: 0153 | 97  | 0,42685322 | 1,119 | 0,13147 | 1,244 | 0,67341781 | 0,900 |  |  |  |  | 1,059 | 0,851 | 0,946 | -10,0423 |
| ID: 0154 | 98  | 0,24013409 | 0,868 | 0,06078 | 0,742 | 0,07130598 | 1,171 |  |  |  |  | 0,799 | 1,077 | 0,92  | 17,0652  |
| ID: 0155 | 99  | 0,22095972 | 0,840 | 0,15462 | 0,788 | 0,27645561 | 1,066 |  |  |  |  | 0,819 | 1,039 | 0,975 | 6,5641   |
| ID: 0157 | 100 | 0,25156972 | 0,860 | 0,25423 | 0,861 | 0,99022336 | 0,999 |  |  |  |  | 1,109 | 1,288 | 1,289 | -0,0776  |
| ID: 0158 | 101 | 0,83216779 | 1,002 | 0,71988 | 1,036 | 0,93676008 | 0,967 |  |  |  |  | 1,054 | 1,017 | 1,052 | -3,3270  |
| ID: 0159 | 102 | 0,12921189 | 0,758 | 0,02937 | 0,660 | 0,23773833 | 1,148 |  |  |  |  | 0,789 | 1,195 | 1,041 | 14,7935  |
| ID: 0160 | 103 | 0,16763555 | 0,833 | 0,03862 | 0,679 | 0,11017665 | 1,226 |  |  |  |  | 0,673 | 0,991 | 0,808 | 22,6485  |
| ID: 0162 | 104 | 0,48626021 | 1,114 | 0,39409 | 1,152 | 0,93528921 | 0,967 |  |  |  |  | 0,939 | 0,815 | 0,843 | -3,3215  |
| ID: 0163 | 105 | 0,22239877 | 0,794 | 0,00179 | 0,684 | 0,26381816 | 1,161 |  |  |  |  | 0,771 | 1,127 | 0,971 | 16,0659  |
| ID: 0164 | 106 | 0,41437722 | 0,892 | 0,42314 | 0,888 | 0,9546227  | 1,005 |  |  |  |  | 0,75  | 0,845 | 0,841 | 0,4756   |
| ID: 0165 | 107 | 0,76949313 | 0,935 | 0,37921 | 0,866 | 0,52499487 | 1,080 |  |  |  |  | 1,037 | 1,198 | 1,109 | 8,0252   |
| ID: 0167 | 108 | 0,49169558 | 0,881 | 0,35759 | 0,793 | 0,64846566 | 1,111 |  |  |  |  | 0,761 | 0,96  | 0,864 | 11,1111  |
| ID: 0168 | 109 | 0,38463157 | 1,134 | 0,17679 | 1,326 | 0,50265494 | 0,855 |  |  |  |  | 1,142 | 0,861 | 1,007 | -14,4985 |
| ID: 0170 | 110 | 0,18205971 | 0,847 | 0,07334 | 0,837 | 0,83693799 | 1,012 |  |  |  |  | 0,898 | 1,073 | 1,060 | 1,2264   |

|          |     |            |       |         |       |            |       |                                                                                                              |    |               |                                                                       |       |       |       |          |
|----------|-----|------------|-------|---------|-------|------------|-------|--------------------------------------------------------------------------------------------------------------|----|---------------|-----------------------------------------------------------------------|-------|-------|-------|----------|
| ID: 0171 | 111 | 0,52628183 | 1,107 | 0,32337 | 1,260 | 0,63227902 | 0,879 |                                                                                                              |    |               |                                                                       | 1,115 | 0,885 | 1,007 | -12,1152 |
| ID: 0172 | 112 | 0,70595654 | 1,037 | 0,19828 | 0,871 | 0,18574503 | 1,190 |                                                                                                              |    |               |                                                                       | 1,046 | 1,201 | 1,009 | 19,0287  |
| ID: 0173 | 113 | 0,606063   | 0,934 | 0,11658 | 0,864 | 0,46162721 | 1,081 |                                                                                                              |    |               |                                                                       | 0,893 | 1,033 | 0,956 | 8,0544   |
| ID: 0175 | 114 | 0,3361382  | 0,930 | 0,15116 | 0,851 | 0,34766238 | 1,094 |                                                                                                              |    |               |                                                                       | 0,923 | 1,085 | 0,992 | 9,3750   |
| ID: 0176 | 115 | 0,51419087 | 1,109 | 0,20776 | 1,395 | 0,47455144 | 0,795 |                                                                                                              |    |               |                                                                       | 1,152 | 0,826 | 1,039 | -20,5005 |
| ID: 0177 | 116 | 0,0820049  | 0,856 | 0,00465 | 0,718 | 0,03076929 | 1,192 | Agrotis_qualite_rep_c514 O RF4 length 662 aa, 1989 bp, from complement(37..2025) of Agrotis_qualite_rep_c514 | 23 | G6D6V6_D ANPL | Protease m1 zinc metalloprotease Danaus plexippus (Monarch butterfly) | 0,843 | 1,174 | 0,985 | 19,1878  |
|          |     |            |       |         |       |            |       | Agrotis_qualite_rep_c3329 ORF3 length 247 aa, 744 bp, from 3..746 of                                         | 7  | G6D6V5_D ANPL | Protease m1 zinc metalloprotease Danaus plexippus (Monarch            | 0,843 | 1,174 | 0,985 | 19,1878  |
|          |     |            |       |         |       |            |       | Agrotis_qualite_rep_c1757 ORF25 length 189 aa, 570 bp, from 1081..1650 of                                    | 4  |               |                                                                       | 0,843 | 1,174 | 0,985 | 19,1878  |
| ID: 0178 | 117 | 0,95754863 | 1,001 | 0,93081 | 1,002 | 0,96679105 | 0,999 |                                                                                                              |    |               |                                                                       | 1,017 | 1,015 | 1,016 | -0,0984  |
| ID: 0179 | 118 | 0,96741056 | 0,997 | 0,66075 | 0,955 | 0,6741835  | 1,044 |                                                                                                              |    |               |                                                                       | 1,045 | 1,094 | 1,048 | 4,3893   |
| ID: 0180 | 119 | 0,04205988 | 0,826 | 0,04375 | 0,718 | 0,20016193 | 1,151 |                                                                                                              |    |               |                                                                       | 0,862 | 1,201 | 1,043 | 15,1486  |
| ID: 0181 | 120 | 0,33828818 | 0,877 | 0,04786 | 0,755 | 0,11089917 | 1,162 |                                                                                                              |    |               |                                                                       | 0,909 | 1,204 | 1,036 | 16,2162  |
| ID: 0183 | 121 | 0,85625619 | 1,020 | 0,46824 | 1,096 | 0,4229656  | 0,931 |                                                                                                              |    |               |                                                                       | 1,047 | 0,955 | 1,026 | -6,9201  |
| ID: 0184 | 122 | 0,88616693 | 0,991 | 0,25991 | 0,890 | 0,22150019 | 1,113 |                                                                                                              |    |               |                                                                       | 0,902 | 1,013 | 0,91  | 11,3187  |
| ID: 0185 | 123 | 0,26315739 | 1,200 | 0,15476 | 1,498 | 0,36026172 | 0,801 |                                                                                                              |    |               |                                                                       | 1,164 | 0,777 | 0,97  | -19,8969 |
| ID: 0186 | 124 | 0,69801202 | 1,037 | 0,25491 | 1,124 | 0,55791013 | 0,922 |                                                                                                              |    |               |                                                                       | 1,042 | 0,927 | 1,005 | -7,7612  |
| ID: 0187 | 125 | 0,01342831 | 0,785 | 0,00267 | 0,594 | 0,03594707 | 1,322 | Agrotis_qualite_rep_c514 O RF4 length 662 aa, 1989 bp, from complement(37..2025) of Agrotis_qualite_rep_c514 | 20 | G6D6V6_D ANPL | Protease m1 zinc metalloprotease Danaus plexippus (Monarch butterfly) | 0,741 | 1,248 | 0,944 | 32,2034  |
|          |     |            |       |         |       |            |       | Agrotis_qualite_rep_c3329 ORF3 length 247 aa, 744 bp, from 3..746 of                                         | 5  | G6D6V5_D ANPL | Protease m1 zinc metalloprotease Danaus plexippus (Monarch            | 0,741 | 1,248 | 0,944 | 32,2034  |
|          |     |            |       |         |       |            |       | Agrotis_qualite_rep_c1757 ORF25 length 189 aa, 570 bp, from 1081..1650 of                                    | 5  |               |                                                                       | 0,741 | 1,248 | 0,944 | 32,2034  |
|          |     |            |       |         |       |            |       | Agrotis_qualite_rep_c659 O RF23 length 505 aa, 1518 bp, from 992..2509 of                                    | 2  |               |                                                                       | 0,741 | 1,248 | 0,944 | 32,2034  |
| ID: 0188 | 126 | 0,21088993 | 1,239 | 0,06867 | 1,507 | 0,39300591 | 0,822 |                                                                                                              |    |               |                                                                       | 1,209 | 0,802 | 0,976 | -17,8279 |

|          |     |            |       |         |       |            |       |                                                                                                              |   |               |                                                                                  |       |       |       |          |
|----------|-----|------------|-------|---------|-------|------------|-------|--------------------------------------------------------------------------------------------------------------|---|---------------|----------------------------------------------------------------------------------|-------|-------|-------|----------|
| ID: 0189 | 127 | 0,10323753 | 0,869 | 0,00029 | 0,678 | 0,0171166  | 1,281 | Agrotis_qualite_rep_c514 O RF4 length 662 aa, 1989 bp, from complement(37..2025) of Agrotis_qualite_rep_c514 | 9 | G6D6V6_D ANPL | Protease m1 zinc metalloprotease Danaus plexippus (Monarch butterfly)            | 0,829 | 1,222 | 0,954 | 28,0922  |
|          |     |            |       |         |       |            |       | Agrotis_qualite_rep_c3329 ORF3 length 247 aa, 744 bp, from 3..746 of                                         | 2 | G6D6V5_D ANPL | Protease m1 zinc metalloprotease Danaus plexippus (Monarch butterfly)            | 0,829 | 1,222 | 0,954 | 28,0922  |
|          |     |            |       |         |       |            |       | Agrotis_qualite_rep_c1757 ORF25 length 189 aa, 570 bp, from 1081..1650 of                                    | 1 |               |                                                                                  | 0,829 | 1,222 | 0,954 | 28,0922  |
|          |     |            |       |         |       |            |       | Agrotis_qualite_rep_c659 O RF23 length 505 aa, 1518 bp, from 992..2509 of                                    | 3 |               |                                                                                  | 0,829 | 1,222 | 0,954 | 28,0922  |
|          |     |            |       |         |       |            |       | Agrotis_qualite_c19428 ORF1 length 480 aa, 1440 bp, from 1..1440 of                                          | 2 |               |                                                                                  | 0,829 | 1,222 | 0,954 | 28,0922  |
| ID: 0190 | 128 | 0,07691473 | 1,406 | 0,01126 | 1,879 | 0,27479588 | 0,748 |                                                                                                              |   |               |                                                                                  | 1,285 | 0,684 | 0,914 | -25,1641 |
| ID: 0191 | 129 | 0,76237406 | 0,982 | 0,83328 | 0,987 | 0,92159309 | 0,995 |                                                                                                              |   |               |                                                                                  | 1,055 | 1,069 | 1,074 | -0,4655  |
| ID: 0192 | 130 | 0,41527021 | 0,883 | 0,63037 | 1,128 | 0,08559066 | 0,783 |                                                                                                              |   |               |                                                                                  | 0,839 | 0,744 | 0,95  | -21,6842 |
| ID: 0196 | 131 | 0,47282263 | 0,941 | 0,42052 | 0,849 | 0,59005122 | 1,108 |                                                                                                              |   |               |                                                                                  | 0,969 | 1,141 | 1,030 | 10,7767  |
| ID: 0198 | 132 | 0,15456727 | 1,308 | 0,03589 | 1,767 | 0,28007981 | 0,740 |                                                                                                              |   |               |                                                                                  | 1,325 | 0,75  | 1,013 | -25,9625 |
| ID: 0199 | 133 | 0,09784995 | 1,325 | 0,01558 | 1,794 | 0,2210639  | 0,739 |                                                                                                              |   |               |                                                                                  | 1,166 | 0,65  | 0,88  | -26,1364 |
| ID: 0200 | 134 | 0,09121386 | 1,336 | 0,02094 | 1,607 | 0,3819157  | 0,831 |                                                                                                              |   |               |                                                                                  | 1,300 | 0,809 | 0,973 | -16,8551 |
| ID: 0201 | 135 | 0,18531292 | 0,899 | 0,03072 | 0,852 | 0,39590031 | 1,055 |                                                                                                              |   |               |                                                                                  | 0,97  | 1,138 | 1,079 | 5,4680   |
| ID: 0202 | 136 | 0,3856926  | 1,151 | 0,15678 | 1,341 | 0,71820496 | 0,858 |                                                                                                              |   |               |                                                                                  | 1,187 | 0,885 | 1,031 | -14,1610 |
| ID: 0204 | 137 | 0,46357303 | 0,957 | 0,15488 | 0,882 | 0,28871032 | 1,085 |                                                                                                              |   |               |                                                                                  | 0,933 | 1,058 | 0,975 | 8,5128   |
| ID: 0205 | 138 | 0,20545625 | 1,298 | 0,06165 | 1,640 | 0,46946302 | 0,791 |                                                                                                              |   |               |                                                                                  | 1,332 | 0,812 | 1,026 | -20,8577 |
| ID: 0207 | 139 | 0,03593896 | 0,751 | 0,01636 | 0,691 | 0,43489092 | 1,086 |                                                                                                              |   |               |                                                                                  | 0,771 | 1,115 | 1,027 | 8,5686   |
| ID: 0208 | 140 | 0,10454552 | 0,790 | 0,04449 | 0,818 | 0,85997969 | 0,966 |                                                                                                              |   |               |                                                                                  | 0,89  | 1,088 | 1,126 | -3,3748  |
| ID: 0209 | 141 | 0,04124797 | 1,934 | 0,20192 | 1,551 | 0,69087219 | 1,247 |                                                                                                              |   |               |                                                                                  | 1,607 | 1,036 | 0,831 | 24,6691  |
| ID: 0210 | 142 | 0,82935448 | 1,042 | 0,97286 | 0,989 | 0,80300726 | 1,054 |                                                                                                              |   |               |                                                                                  | 1,006 | 1,017 | 0,965 | 5,3886   |
| ID: 0211 | 143 | 0,21942409 | 1,157 | 0,37137 | 0,905 | 0,09927918 | 1,278 |                                                                                                              |   |               |                                                                                  | 1,071 | 1,183 | 0,926 | 27,7538  |
| ID: 0212 | 144 | 0,96542893 | 1,003 | 0,01837 | 1,202 | 0,01303085 | 0,835 | Agrotis_qualite_rep_c1513 ORF1 length 495 aa, 1488 bp, from 1..1488 of Agrotis_qualite_rep_c1513             | 2 | OGT1_HUMAN    | UDP-N-acetylglucosamine--peptide N-acetylglucosaminyltransferase 110 kDa subunit | 0,971 | 0,808 | 0,968 | -16,5289 |
| ID: 0213 | 145 | 0,07500648 | 0,810 | 0,68895 | 0,967 | 0,01603959 | 0,838 |                                                                                                              |   |               |                                                                                  | 0,933 | 0,965 | 1,152 | -16,2326 |
| ID: 0214 | 146 | 0,26870682 | 0,866 | 0,01201 | 0,780 | 0,29134278 | 1,111 |                                                                                                              |   |               |                                                                                  | 0,895 | 1,148 | 1,033 | 11,1326  |
| ID: 0215 | 147 | 0,85231754 | 1,012 | 0,64076 | 0,958 | 0,51510529 | 1,056 |                                                                                                              |   |               |                                                                                  | 0,845 | 0,882 | 0,835 | 5,6287   |
| ID: 0216 | 148 | 0,02506954 | 0,359 | 0,00075 | 0,315 | 0,4120063  | 1,141 |                                                                                                              |   |               |                                                                                  | 0,406 | 1,289 | 1,130 | 14,0708  |

|          |     |            |       |         |       |            |       |  |  |  |  |       |       |       |          |
|----------|-----|------------|-------|---------|-------|------------|-------|--|--|--|--|-------|-------|-------|----------|
| ID: 0217 | 149 | 0,11100978 | 0,761 | 0,00991 | 0,708 | 0,54041645 | 1,075 |  |  |  |  | 0,845 | 1,194 | 1,111 | 7,4707   |
| ID: 0218 | 150 | 0,51148639 | 0,895 | 0,30016 | 0,775 | 0,48158355 | 1,154 |  |  |  |  | 0,877 | 1,131 | 0,98  | 15,4082  |
| ID: 0219 | 151 | 0,08956243 | 1,208 | 0,1517  | 0,818 | 0,01831897 | 1,477 |  |  |  |  | 1,051 | 1,285 | 0,87  | 47,7011  |
| ID: 0220 | 152 | 0,56123429 | 0,922 | 0,31834 | 0,790 | 0,42600945 | 1,167 |  |  |  |  | 0,877 | 1,110 | 0,951 | 16,7192  |
| ID: 0221 | 153 | 0,44938663 | 0,896 | 0,32325 | 0,823 | 0,57172883 | 1,089 |  |  |  |  | 0,91  | 1,106 | 1,016 | 8,8583   |
| ID: 0222 | 154 | 0,04523698 | 0,825 | 0,16045 | 0,792 | 0,82741307 | 1,041 |  |  |  |  | 0,78  | 0,985 | 0,946 | 4,1226   |
| ID: 0223 | 155 | 0,1804382  | 0,882 | 0,03314 | 0,815 | 0,27362356 | 1,083 |  |  |  |  | 0,915 | 1,123 | 1,037 | 8,2932   |
| ID: 0224 | 156 | 0,78605212 | 1,049 | 0,48763 | 0,934 | 0,09555689 | 1,123 |  |  |  |  | 0,88  | 0,942 | 0,839 | 12,2765  |
| ID: 0226 | 157 | 0,02331796 | 1,272 | 0,31706 | 0,892 | 0,01503055 | 1,426 |  |  |  |  | 1,207 | 1,353 | 0,949 | 42,5711  |
| ID: 0227 | 158 | 0,12311334 | 1,126 | 0,28002 | 1,128 | 0,90806987 | 0,998 |  |  |  |  | 1,135 | 1,006 | 1,008 | -0,1984  |
| ID: 0228 | 159 | 0,46538235 | 0,960 | 0,05392 | 0,863 | 0,02806849 | 1,112 |  |  |  |  | 0,933 | 1,081 | 0,972 | 11,2140  |
| ID: 0229 | 160 | 0,19385296 | 0,855 | 0,33874 | 0,843 | 0,99018403 | 1,014 |  |  |  |  | 0,826 | 0,98  | 0,966 | 1,4493   |
| ID: 0230 | 161 | 0,64239912 | 0,974 | 0,22875 | 0,891 | 0,22060998 | 1,093 |  |  |  |  | 0,938 | 1,053 | 0,963 | 9,3458   |
| ID: 0231 | 162 | 0,48839652 | 0,976 | 0,01674 | 0,880 | 0,01554553 | 1,108 |  |  |  |  | 0,921 | 1,046 | 0,944 | 10,8051  |
| ID: 0232 | 163 | 0,42302863 | 0,886 | 0,17815 | 0,782 | 0,33087961 | 1,133 |  |  |  |  | 0,932 | 1,192 | 1,052 | 13,3080  |
| ID: 0233 | 164 | 0,16295663 | 0,920 | 0,06638 | 0,877 | 0,14167693 | 1,050 |  |  |  |  | 0,926 | 1,056 | 1,006 | 4,9702   |
| ID: 0234 | 165 | 0,76329521 | 1,027 | 0,47515 | 0,859 | 0,36143362 | 1,195 |  |  |  |  | 1,099 | 1,279 | 1,070 | 19,5327  |
| ID: 0235 | 166 | 0,8787491  | 1,029 | 0,11119 | 0,759 | 0,04382787 | 1,356 |  |  |  |  | 1,053 | 1,387 | 1,023 | 35,5816  |
| ID: 0236 | 167 | 0,3656432  | 1,112 | 0,69279 | 0,946 | 0,25284378 | 1,175 |  |  |  |  | 1,216 | 1,285 | 1,094 | 17,4589  |
| ID: 0237 | 168 | 0,82463741 | 1,026 | 0,19405 | 0,851 | 0,18552745 | 1,204 |  |  |  |  | 0,883 | 1,037 | 0,861 | 20,4413  |
| ID: 0238 | 169 | 0,12964706 | 0,833 | 0,06212 | 0,798 | 0,5921688  | 1,044 |  |  |  |  | 0,967 | 1,212 | 1,161 | 4,3928   |
| ID: 0239 | 170 | 0,46176364 | 0,901 | 0,00105 | 0,844 | 0,47176993 | 1,068 |  |  |  |  | 0,955 | 1,132 | 1,060 | 6,7925   |
| ID: 0240 | 171 | 0,76299956 | 0,954 | 0,04597 | 0,849 | 0,23197732 | 1,124 |  |  |  |  | 0,975 | 1,149 | 1,022 | 12,4266  |
| ID: 0241 | 172 | 0,09872869 | 1,227 | 0,51971 | 1,089 | 0,09559369 | 1,127 |  |  |  |  | 1,150 | 1,056 | 0,937 | 12,7001  |
| ID: 0242 | 173 | 0,1831594  | 0,914 | 0,02196 | 0,834 | 0,05657441 | 1,096 |  |  |  |  | 0,916 | 1,098 | 1,002 | 9,5808   |
| ID: 0243 | 174 | 0,03530578 | 1,262 | 0,16991 | 1,224 | 0,89757759 | 1,032 |  |  |  |  | 1,193 | 0,975 | 0,945 | 3,1746   |
| ID: 0244 | 175 | 0,03754053 | 1,204 | 0,05148 | 1,382 | 0,22925524 | 0,871 |  |  |  |  | 1,204 | 0,871 | 1,000 | -12,9000 |
| ID: 0245 | 176 | 0,66618842 | 0,868 | 0,6944  | 0,948 | 0,83575076 | 0,916 |  |  |  |  | 0,94  | 0,992 | 1,083 | -8,4026  |
| ID: 0246 | 177 | 0,42389945 | 0,940 | 0,56824 | 0,961 | 0,62125864 | 0,979 |  |  |  |  | 0,975 | 1,015 | 1,037 | -2,1215  |
| ID: 0247 | 178 | 0,67151459 | 0,985 | 0,9819  | 0,992 | 0,84013213 | 0,994 |  |  |  |  | 1,062 | 1,071 | 1,078 | -0,6494  |
| ID: 0248 | 179 | 0,56665246 | 0,961 | 0,06778 | 0,899 | 0,25037072 | 1,069 |  |  |  |  | 0,873 | 0,971 | 0,908 | 6,9383   |
| ID: 0249 | 180 | 0,44278987 | 0,936 | 0,63989 | 0,965 | 0,61229031 | 0,969 |  |  |  |  | 0,92  | 0,953 | 0,983 | -3,0519  |
| ID: 0250 | 181 | 0,73078265 | 0,978 | 0,44115 | 0,902 | 0,39370591 | 1,084 |  |  |  |  | 0,896 | 0,993 | 0,916 | 8,4061   |
| ID: 0251 | 182 | 0,07421322 | 0,812 | 0,79537 | 1,036 | 0,04153805 | 0,784 |  |  |  |  | 0,875 | 0,845 | 1,078 | -21,6141 |
| ID: 0252 | 183 | 0,73168973 | 0,984 | 0,81663 | 0,987 | 0,92865057 | 0,997 |  |  |  |  | 1,077 | 1,091 | 1,094 | -0,2742  |
| ID: 0253 | 184 | 0,62375072 | 1,071 | 0,86248 | 0,955 | 0,55247158 | 1,122 |  |  |  |  | 1,134 | 1,188 | 1,059 | 12,1813  |
| ID: 0254 | 185 | 0,51266775 | 1,046 | 0,26804 | 1,072 | 0,66512981 | 0,976 |  |  |  |  | 0,908 | 0,847 | 0,868 | -2,4194  |
| ID: 0255 | 186 | 0,15160775 | 1,145 | 0,26147 | 1,168 | 0,80643326 | 0,981 |  |  |  |  | 1,323 | 1,133 | 1,155 | -1,9048  |
| ID: 0256 | 187 | 0,6691635  | 1,022 | 0,09466 | 1,137 | 0,06280029 | 0,898 |  |  |  |  | 0,993 | 0,873 | 0,972 | -10,1852 |
| ID: 0257 | 188 | 0,34057613 | 0,914 | 0,59293 | 0,909 | 0,93495012 | 1,005 |  |  |  |  | 0,9   | 0,99  | 0,985 | 0,5076   |



|          |     |            |       |         |       |            |       |  |  |  |  |       |       |       |          |
|----------|-----|------------|-------|---------|-------|------------|-------|--|--|--|--|-------|-------|-------|----------|
| ID: 0258 | 189 | 0,09414214 | 0,805 | 0,93517 | 0,996 | 0,05696796 | 0,808 |  |  |  |  | 0,817 | 0,82  | 1,015 | -19,2118 |
| ID: 0259 | 190 | 0,45737877 | 0,940 | 0,74459 | 0,955 | 0,79352707 | 0,984 |  |  |  |  | 0,871 | 0,912 | 0,927 | -1,6181  |
| ID: 0260 | 191 | 0,63959022 | 1,085 | 0,13    | 1,308 | 0,07817592 | 0,829 |  |  |  |  | 0,883 | 0,675 | 0,814 | -17,0762 |
| ID: 0261 | 192 | 0,16171569 | 0,901 | 0,11535 | 0,869 | 0,55596401 | 1,037 |  |  |  |  | 0,971 | 1,118 | 1,078 | 3,7106   |
| ID: 0262 | 193 | 0,60173026 | 0,943 | 0,93793 | 1,033 | 0,42001819 | 0,913 |  |  |  |  | 0,882 | 0,854 | 0,935 | -8,6631  |
| ID: 0263 | 194 | 0,90001943 | 0,987 | 0,87668 | 1,025 | 0,74162646 | 0,962 |  |  |  |  | 0,805 | 0,785 | 0,816 | -3,7990  |
| ID: 0264 | 195 | 0,5401697  | 0,960 | 0,44979 | 1,074 | 0,04137774 | 0,894 |  |  |  |  | 0,897 | 0,835 | 0,934 | -10,5996 |
| ID: 0265 | 196 | 0,42481382 | 1,086 | 0,37393 | 0,816 | 0,14916663 | 1,330 |  |  |  |  | 0,881 | 1,079 | 0,811 | 33,0456  |
| ID: 0266 | 197 | 0,88563415 | 1,014 | 0,03861 | 1,248 | 0,03291171 | 0,812 |  |  |  |  | 0,8   | 0,641 | 0,789 | -18,7579 |
| ID: 0267 | 198 | 0,65476876 | 0,969 | 0,08059 | 0,849 | 0,08111351 | 1,141 |  |  |  |  | 0,998 | 1,175 | 1,030 | 14,0777  |
| ID: 0268 | 199 | 0,49567266 | 0,938 | 0,87296 | 0,987 | 0,57559093 | 0,951 |  |  |  |  | 0,808 | 0,819 | 0,861 | -4,8780  |
| ID: 0269 | 200 | 0,19315258 | 0,839 | 0,04046 | 0,668 | 0,17298043 | 1,257 |  |  |  |  | 0,752 | 1,126 | 0,896 | 25,6696  |
| ID: 0270 | 201 | 0,71724968 | 0,976 | 0,73867 | 0,959 | 0,91312398 | 1,017 |  |  |  |  | 0,84  | 0,876 | 0,861 | 1,7422   |
| ID: 0271 | 202 | 0,2548602  | 1,175 | 0,36699 | 1,183 | 0,84067275 | 0,994 |  |  |  |  | 1,092 | 0,923 | 0,929 | -0,6459  |
| ID: 0272 | 203 | 0,25735749 | 0,883 | 0,08566 | 0,803 | 0,28285384 | 1,101 |  |  |  |  | 0,894 | 1,114 | 1,012 | 10,0791  |
| ID: 0273 | 204 | 0,95357282 | 1,000 | 0,48845 | 1,072 | 0,57299771 | 0,933 |  |  |  |  | 0,939 | 0,876 | 0,939 | -6,7093  |
| ID: 0274 | 205 | 0,8080515  | 1,017 | 0,1133  | 1,115 | 0,36048363 | 0,912 |  |  |  |  | 0,846 | 0,759 | 0,832 | -8,7740  |
| ID: 0275 | 206 | 0,75763646 | 0,982 | 0,56205 | 1,120 | 0,13703341 | 0,877 |  |  |  |  | 0,729 | 0,651 | 0,742 | -12,2642 |
| ID: 0276 | 207 | 0,26586855 | 1,211 | 0,96721 | 1,005 | 0,28844562 | 1,205 |  |  |  |  | 0,951 | 0,946 | 0,785 | 20,5096  |
| ID: 0277 | 208 | 0,68855826 | 1,052 | 0,20972 | 0,870 | 0,06678811 | 1,209 |  |  |  |  | 1,012 | 1,163 | 0,962 | 20,8940  |
| ID: 0279 | 209 | 0,19783634 | 0,875 | 0,81384 | 0,973 | 0,33947483 | 0,899 |  |  |  |  | 0,801 | 0,823 | 0,915 | -10,0546 |
| ID: 0280 | 210 | 0,73596442 | 1,032 | 0,78954 | 1,025 | 0,96206009 | 1,007 |  |  |  |  | 0,858 | 0,837 | 0,831 | 0,7220   |
| ID: 0282 | 211 | 0,50595251 | 0,911 | 0,36685 | 0,876 | 0,7381371  | 1,040 |  |  |  |  | 0,816 | 0,932 | 0,896 | 4,0179   |
| ID: 0283 | 212 | 0,14201808 | 0,892 | 0,05347 | 0,830 | 0,13573498 | 1,074 |  |  |  |  | 1,006 | 1,212 | 1,128 | 7,4468   |
| ID: 0284 | 213 | 0,15371635 | 0,894 | 0,02438 | 0,798 | 0,08953097 | 1,120 |  |  |  |  | 1,005 | 1,259 | 1,124 | 12,0107  |
| ID: 0285 | 214 | 0,22573077 | 1,269 | 0,12749 | 1,532 | 0,49201839 | 0,828 |  |  |  |  | 1,339 | 0,874 | 1,055 | -17,1564 |
| ID: 0286 | 215 | 0,3761236  | 0,960 | 0,02858 | 0,889 | 0,03856304 | 1,080 |  |  |  |  | 1,109 | 1,247 | 1,155 | 7,9654   |
| ID: 0290 | 216 | 0,76913042 | 1,014 | 0,82301 | 0,974 | 0,66971205 | 1,041 |  |  |  |  | 1,085 | 1,114 | 1,070 | 4,1121   |
| ID: 0291 | 217 | 0,27787252 | 1,198 | 0,69994 | 1,080 | 0,25941713 | 1,109 |  |  |  |  | 1,240 | 1,148 | 1,035 | 10,9179  |
| ID: 0292 | 218 | 0,2809748  | 0,933 | 0,0575  | 0,799 | 0,05376141 | 1,168 |  |  |  |  | 1,003 | 1,256 | 1,075 | 16,8372  |
| ID: 0293 | 219 | 0,92184379 | 1,005 | 0,4278  | 0,939 | 0,40111961 | 1,070 |  |  |  |  | 1,082 | 1,152 | 1,077 | 6,9638   |
| ID: 0294 | 220 | 0,41185179 | 0,959 | 0,68121 | 0,973 | 0,69409417 | 0,986 |  |  |  |  | 1,039 | 1,068 | 1,083 | -1,3850  |
| ID: 0295 | 221 | 0,23937938 | 0,886 | 0,02832 | 0,779 | 0,19872264 | 1,138 |  |  |  |  | 0,872 | 1,120 | 0,984 | 13,8211  |
| ID: 0297 | 222 | 0,02878239 | 0,797 | 0,0066  | 0,740 | 0,2364046  | 1,077 |  |  |  |  | 0,948 | 1,281 | 1,189 | 7,7376   |
| ID: 0298 | 223 | 0,16147573 | 0,876 | 0,03366 | 0,791 | 0,13605975 | 1,106 |  |  |  |  | 0,987 | 1,247 | 1,127 | 10,6477  |
| ID: 0299 | 224 | 0,26320505 | 1,083 | 0,3435  | 1,073 | 0,8617962  | 1,009 |  |  |  |  | 1,046 | 0,975 | 0,966 | 0,9317   |
| ID: 0300 | 225 | 0,14774608 | 1,288 | 0,03147 | 1,439 | 0,59768721 | 0,895 |  |  |  |  | 1,396 | 0,97  | 1,084 | -10,5166 |
| ID: 0301 | 226 | 0,08906691 | 0,916 | 0,07978 | 0,867 | 0,48207958 | 1,056 |  |  |  |  | 0,896 | 1,033 | 0,978 | 5,6237   |
| ID: 0302 | 227 | 0,12678073 | 0,894 | 0,03028 | 0,842 | 0,32515594 | 1,062 |  |  |  |  | 0,985 | 1,170 | 1,102 | 6,1706   |
| ID: 0303 | 228 | 0,0004124  | 0,614 | 0,0032  | 0,626 | 0,79338947 | 0,980 |  |  |  |  | 0,785 | 1,253 | 1,278 | -1,9562  |



|          |     |            |       |         |       |            |       |  |  |  |  |       |       |       |          |
|----------|-----|------------|-------|---------|-------|------------|-------|--|--|--|--|-------|-------|-------|----------|
| ID: 0304 | 229 | 0,31611485 | 1,085 | 0,27907 | 1,106 | 0,79000153 | 0,981 |  |  |  |  | 1,157 | 1,046 | 1,066 | -1,8762  |
| ID: 0305 | 230 | 0,74990389 | 1,055 | 0,48498 | 0,927 | 0,13086334 | 1,139 |  |  |  |  | 1,110 | 1,198 | 1,052 | 13,8783  |
| ID: 0306 | 231 | 0,53319256 | 0,917 | 0,09335 | 0,808 | 0,18919015 | 1,136 |  |  |  |  | 0,999 | 1,237 | 1,089 | 13,5904  |
| ID: 0307 | 232 | 0,37503141 | 0,946 | 0,12469 | 0,904 | 0,32166442 | 1,047 |  |  |  |  | 1,068 | 1,182 | 1,129 | 4,6944   |
| ID: 0308 | 233 | 0,06247031 | 0,879 | 0,05521 | 0,852 | 0,55388596 | 1,033 |  |  |  |  | 0,889 | 1,044 | 1,011 | 3,2641   |
| ID: 0309 | 234 | 0,40897253 | 0,948 | 0,09784 | 0,870 | 0,06100606 | 1,090 |  |  |  |  | 0,972 | 1,117 | 1,025 | 8,9756   |
| ID: 0310 | 235 | 0,54717449 | 0,855 | 0,26431 | 1,153 | 0,21765874 | 0,741 |  |  |  |  | 0,74  | 0,642 | 0,866 | -25,8661 |
| ID: 0311 | 236 | 0,28042025 | 0,899 | 0,04206 | 0,802 | 0,08374443 | 1,121 |  |  |  |  | 1,027 | 1,280 | 1,142 | 12,0841  |
| ID: 0312 | 237 | 0,61941328 | 0,938 | 0,19825 | 0,799 | 0,20745468 | 1,173 |  |  |  |  | 1,152 | 1,441 | 1,228 | 17,3453  |
| ID: 0313 | 238 | 0,06614716 | 0,738 | 0,08205 | 0,739 | 0,99905971 | 0,998 |  |  |  |  | 0,936 | 1,266 | 1,268 | -0,1577  |
| ID: 0314 | 239 | 0,06946691 | 0,877 | 0,05805 | 0,860 | 0,5498977  | 1,020 |  |  |  |  | 0,895 | 1,041 | 1,021 | 1,9589   |
| ID: 0315 | 240 | 0,48241168 | 0,920 | 0,23461 | 0,871 | 0,62133277 | 1,056 |  |  |  |  | 1,017 | 1,168 | 1,106 | 5,6058   |
| ID: 0316 | 241 | 0,01348442 | 0,716 | 0,04241 | 0,816 | 0,27871338 | 0,876 |  |  |  |  | 0,903 | 1,106 | 1,262 | -12,3613 |
| ID: 0317 | 242 | 0,6063169  | 0,958 | 0,0745  | 0,795 | 0,07281844 | 1,205 |  |  |  |  | 0,945 | 1,188 | 0,986 | 20,4868  |
| ID: 0320 | 243 | 0,13843582 | 1,119 | 0,58787 | 1,061 | 0,84417777 | 1,054 |  |  |  |  | 1,074 | 1,012 | 0,96  | 5,4167   |
| ID: 0321 | 244 | 0,59803334 | 1,145 | 0,81328 | 1,095 | 0,51825812 | 1,045 |  |  |  |  | 1,140 | 1,041 | 0,996 | 4,5181   |
| ID: 0323 | 245 | 0,8143513  | 0,966 | 0,04802 | 0,773 | 0,08249581 | 1,249 |  |  |  |  | 0,907 | 1,173 | 0,939 | 24,9201  |
| ID: 0325 | 246 | 0,90379425 | 0,974 | 0,16705 | 1,252 | 0,15362641 | 0,778 |  |  |  |  | 1,038 | 0,829 | 1,066 | -22,2326 |
| ID: 0326 | 247 | 0,5543617  | 0,941 | 0,57434 | 0,950 | 0,94506917 | 0,990 |  |  |  |  | 0,983 | 1,035 | 1,045 | -0,9569  |
| ID: 0328 | 248 | 0,35503521 | 1,031 | 0,6663  | 1,020 | 0,86251607 | 1,011 |  |  |  |  | 1,087 | 1,066 | 1,054 | 1,1385   |
| ID: 0330 | 249 | 0,21167268 | 0,896 | 0,00821 | 0,815 | 0,23226126 | 1,100 |  |  |  |  | 0,96  | 1,178 | 1,071 | 9,9907   |
| ID: 0331 | 250 | 0,65186973 | 1,045 | 0,80013 | 0,935 | 0,55640995 | 1,118 |  |  |  |  | 1,088 | 1,164 | 1,041 | 11,8156  |
| ID: 0332 | 251 | 0,11550911 | 0,855 | 0,03156 | 0,825 | 0,63853514 | 1,037 |  |  |  |  | 0,89  | 1,079 | 1,041 | 3,6503   |
| ID: 0333 | 252 | 0,4779112  | 0,958 | 0,42122 | 0,910 | 0,59285429 | 1,053 |  |  |  |  | 0,976 | 1,073 | 1,019 | 5,2993   |
| ID: 0334 | 253 | 0,01696596 | 1,173 | 0,17372 | 1,090 | 0,13438239 | 1,077 |  |  |  |  | 1,286 | 1,180 | 1,096 | 7,6642   |
| ID: 0335 | 254 | 0,74472069 | 0,974 | 0,08519 | 0,835 | 0,07244406 | 1,166 |  |  |  |  | 0,978 | 1,171 | 1,004 | 16,6335  |
| ID: 0336 | 255 | 0,58676406 | 1,050 | 0,70757 | 1,031 | 0,76602825 | 1,019 |  |  |  |  | 1,070 | 1,038 | 1,019 | 1,8646   |
| ID: 0337 | 256 | 0,13887195 | 1,100 | 0,09758 | 1,108 | 0,93168611 | 0,993 |  |  |  |  | 1,153 | 1,041 | 1,048 | -0,6679  |
| ID: 0338 | 257 | 0,12222162 | 1,096 | 0,54427 | 1,042 | 0,40745978 | 1,051 |  |  |  |  | 1,193 | 1,145 | 1,089 | 5,1423   |
| ID: 0339 | 258 | 0,58098255 | 0,944 | 0,10499 | 0,822 | 0,06666612 | 1,148 |  |  |  |  | 1,101 | 1,339 | 1,166 | 14,8370  |
| ID: 0340 | 259 | 0,7947791  | 0,986 | 0,13202 | 0,932 | 0,25202936 | 1,057 |  |  |  |  | 1,091 | 1,170 | 1,107 | 5,6911   |
| ID: 0341 | 260 | 0,33903413 | 0,857 | 0,99208 | 1,008 | 0,29280212 | 0,851 |  |  |  |  | 1,052 | 1,044 | 1,227 | -14,9144 |
| ID: 0342 | 261 | 0,48338014 | 0,964 | 0,15502 | 0,904 | 0,38270498 | 1,067 |  |  |  |  | 0,985 | 1,090 | 1,022 | 6,6536   |
| ID: 0343 | 262 | 0,60942858 | 0,951 | 0,92013 | 1,011 | 0,52000784 | 0,941 |  |  |  |  | 1,012 | 1,001 | 1,064 | -5,9211  |
| ID: 0345 | 263 | 0,26793043 | 0,933 | 0,06733 | 0,853 | 0,1862387  | 1,094 |  |  |  |  | 0,911 | 1,068 | 0,976 | 9,4262   |
| ID: 0346 | 264 | 0,53942871 | 0,967 | 0,19126 | 0,850 | 0,26082212 | 1,137 |  |  |  |  | 0,874 | 1,028 | 0,904 | 13,7168  |
| ID: 0347 | 265 | 0,69719381 | 1,112 | 0,04704 | 1,760 | 0,04889024 | 0,632 |  |  |  |  | 0,535 | 0,304 | 0,481 | -36,7983 |
| ID: 0349 | 266 | 0,10114734 | 0,865 | 0,01222 | 0,818 | 0,49284584 | 1,058 |  |  |  |  | 0,926 | 1,132 | 1,070 | 5,7944   |
| ID: 0353 | 267 | 0,19426604 | 0,588 | 0,26246 | 0,734 | 0,65870235 | 0,801 |  |  |  |  | 0,71  | 0,967 | 1,207 | -19,8840 |
| ID: 0354 | 268 | 0,1243044  | 0,927 | 0,25465 | 0,907 | 0,79658266 | 1,022 |  |  |  |  | 0,974 | 1,074 | 1,051 | 2,1884   |

|          |     |            |       |         |       |            |       |  |  |  |  |       |       |       |          |
|----------|-----|------------|-------|---------|-------|------------|-------|--|--|--|--|-------|-------|-------|----------|
| ID: 0355 | 269 | 0,79834828 | 1,012 | 0,86075 | 1,009 | 0,95826294 | 1,003 |  |  |  |  | 0,981 | 0,972 | 0,969 | 0,3096   |
| ID: 0356 | 270 | 0,53991465 | 1,074 | 0,75286 | 1,049 | 0,54688275 | 1,024 |  |  |  |  | 1,050 | 1,001 | 0,978 | 2,3517   |
| ID: 0357 | 271 | 0,42030223 | 1,071 | 0,01322 | 1,205 | 0,30645772 | 0,889 |  |  |  |  | 1,115 | 0,925 | 1,041 | -11,1431 |
| ID: 0358 | 272 | 0,93192141 | 1,005 | 0,7686  | 0,958 | 0,71321291 | 1,049 |  |  |  |  | 1,070 | 1,117 | 1,065 | 4,8826   |
| ID: 0359 | 273 | 0,26446902 | 1,084 | 0,25301 | 1,116 | 0,75949853 | 0,971 |  |  |  |  | 1,249 | 1,119 | 1,152 | -2,8646  |
| ID: 0360 | 274 | 0,62980919 | 1,130 | 0,25253 | 1,324 | 0,31372957 | 0,853 |  |  |  |  | 1,041 | 0,786 | 0,921 | -14,6580 |
| ID: 0361 | 275 | 0,45202236 | 1,054 | 0,01575 | 1,273 | 0,09959045 | 0,828 |  |  |  |  | 1,116 | 0,877 | 1,059 | -17,1860 |
| ID: 0362 | 276 | 0,93417193 | 0,983 | 0,32098 | 1,139 | 0,30901141 | 0,863 |  |  |  |  | 0,997 | 0,875 | 1,014 | -13,7081 |
| ID: 0363 | 277 | 0,25548837 | 1,134 | 0,06342 | 1,256 | 0,33437766 | 0,903 |  |  |  |  | 1,248 | 0,994 | 1,101 | -9,7184  |
| ID: 0364 | 278 | 0,41331052 | 1,058 | 0,2213  | 0,910 | 0,03502336 | 1,163 |  |  |  |  | 1,143 | 1,256 | 1,080 | 16,2963  |
| ID: 0365 | 279 | 0,80046467 | 0,992 | 0,45768 | 0,951 | 0,40194281 | 1,043 |  |  |  |  | 0,972 | 1,022 | 0,98  | 4,2857   |
| ID: 0366 | 280 | 0,98200473 | 0,998 | 0,52522 | 1,051 | 0,58836259 | 0,950 |  |  |  |  | 0,971 | 0,924 | 0,973 | -5,0360  |
| ID: 0367 | 281 | 0,4039208  | 0,932 | 0,20678 | 1,144 | 0,02991613 | 0,815 |  |  |  |  | 1,032 | 0,902 | 1,107 | -18,5185 |
| ID: 0368 | 282 | 0,0624504  | 0,890 | 0,01333 | 0,856 | 0,43920066 | 1,040 |  |  |  |  | 1,009 | 1,179 | 1,134 | 3,9683   |
| ID: 0369 | 283 | 0,01059838 | 0,908 | 0,03397 | 0,909 | 0,94100421 | 0,998 |  |  |  |  | 1,034 | 1,137 | 1,139 | -0,1756  |
| ID: 0371 | 284 | 0,10850193 | 1,561 | 0,12851 | 1,603 | 0,84972678 | 0,974 |  |  |  |  | 1,391 | 0,868 | 0,891 | -2,5814  |
| ID: 0372 | 285 | 0,52161774 | 0,951 | 0,82726 | 1,035 | 0,21779223 | 0,919 |  |  |  |  | 0,935 | 0,903 | 0,983 | -8,1384  |
| ID: 0374 | 286 | 0,55573127 | 1,034 | 0,21089 | 1,083 | 0,57968468 | 0,955 |  |  |  |  | 1,004 | 0,927 | 0,971 | -4,5314  |
| ID: 0375 | 287 | 0,96747309 | 1,006 | 0,68363 | 0,967 | 0,60932323 | 1,040 |  |  |  |  | 0,945 | 0,977 | 0,939 | 4,0469   |
| ID: 0376 | 288 | 0,0293291  | 0,901 | 0,12793 | 0,908 | 0,79332729 | 0,993 |  |  |  |  | 0,974 | 1,073 | 1,081 | -0,7401  |
| ID: 0378 | 289 | 0,76970923 | 1,025 | 0,96965 | 0,989 | 0,77185201 | 1,036 |  |  |  |  | 1,127 | 1,139 | 1,099 | 3,6397   |
| ID: 0379 | 290 | 0,03040604 | 0,845 | 0,09202 | 0,872 | 0,5748129  | 0,969 |  |  |  |  | 0,977 | 1,120 | 1,156 | -3,1142  |
| ID: 0380 | 291 | 0,89322338 | 1,021 | 0,61401 | 1,067 | 0,6268744  | 0,957 |  |  |  |  | 0,987 | 0,925 | 0,967 | -4,3433  |
| ID: 0381 | 292 | 0,82070235 | 1,012 | 0,69096 | 0,980 | 0,66263782 | 1,033 |  |  |  |  | 1,075 | 1,097 | 1,062 | 3,2957   |
| ID: 0382 | 293 | 0,01673726 | 0,874 | 0,08605 | 0,900 | 0,42103635 | 0,972 |  |  |  |  | 0,961 | 1,068 | 1,099 | -2,8207  |
| ID: 0384 | 294 | 0,93014902 | 0,938 | 0,07509 | 1,130 | 0,66421397 | 0,830 |  |  |  |  | 1,139 | 1,008 | 1,214 | -16,9687 |
| ID: 0385 | 295 | 0,11946106 | 1,249 | 0,00407 | 1,450 | 0,42016315 | 0,861 |  |  |  |  | 1,285 | 0,886 | 1,029 | -13,8970 |
| ID: 0386 | 296 | 0,9714869  | 1,001 | 0,21529 | 0,906 | 0,10539083 | 1,105 |  |  |  |  | 1,013 | 1,118 | 1,012 | 10,4743  |
| ID: 0387 | 297 | 0,04093541 | 0,894 | 0,06238 | 0,864 | 0,53645805 | 1,034 |  |  |  |  | 0,966 | 1,118 | 1,081 | 3,4228   |
| ID: 0388 | 298 | 0,02927877 | 0,877 | 0,01281 | 0,833 | 0,39190512 | 1,052 |  |  |  |  | 0,89  | 1,068 | 1,015 | 5,2217   |
| ID: 0390 | 299 | 0,70946445 | 1,024 | 0,56554 | 1,063 | 0,6538099  | 0,963 |  |  |  |  | 0,995 | 0,936 | 0,972 | -3,7037  |
| ID: 0391 | 300 | 0,39923842 | 0,776 | 0,58322 | 0,944 | 0,55234517 | 0,822 |  |  |  |  | 0,912 | 0,966 | 1,175 | -17,7872 |
| ID: 0392 | 301 | 0,66492665 | 0,933 | 0,57004 | 1,030 | 0,50843728 | 0,906 |  |  |  |  | 0,931 | 0,904 | 0,998 | -9,4188  |
| ID: 0393 | 302 | 0,31776462 | 1,096 | 0,64705 | 0,972 | 0,04375719 | 1,127 |  |  |  |  | 1,049 | 1,079 | 0,957 | 12,7482  |
| ID: 0394 | 303 | 0,03608443 | 0,914 | 0,00592 | 0,825 | 0,01993828 | 1,108 |  |  |  |  | 0,929 | 1,126 | 1,016 | 10,8268  |
| ID: 0395 | 304 | 0,33170142 | 0,847 | 0,42418 | 0,854 | 0,94150586 | 0,992 |  |  |  |  | 0,849 | 0,994 | 1,002 | -0,7984  |
| ID: 0396 | 305 | 0,60139279 | 0,452 | 0,83458 | 0,982 | 0,6280703  | 0,460 |  |  |  |  | 0,902 | 0,919 | 1,996 | -53,9579 |
| ID: 0397 | 306 | 0,94470836 | 0,998 | 0,43198 | 0,946 | 0,34095447 | 1,055 |  |  |  |  | 0,951 | 1,005 | 0,953 | 5,4565   |
| ID: 0399 | 307 | 0,21624932 | 0,665 | 0,25068 | 0,804 | 0,63982686 | 0,827 |  |  |  |  | 0,681 | 0,847 | 1,024 | -17,2852 |
| ID: 0400 | 308 | 0,39911823 | 0,948 | 0,72541 | 0,907 | 0,96136763 | 1,045 |  |  |  |  | 0,869 | 0,958 | 0,917 | 4,4711   |

|          |     |            |       |         |       |            |       |  |  |  |  |       |       |       |          |
|----------|-----|------------|-------|---------|-------|------------|-------|--|--|--|--|-------|-------|-------|----------|
| ID: 0402 | 309 | 0,72404728 | 0,975 | 0,64562 | 0,941 | 0,77596574 | 1,036 |  |  |  |  | 0,944 | 1,003 | 0,968 | 3,6157   |
| ID: 0403 | 310 | 0,0478282  | 0,866 | 0,66216 | 0,962 | 0,12683723 | 0,900 |  |  |  |  | 0,966 | 1,004 | 1,115 | -9,9552  |
| ID: 0404 | 311 | 0,07592792 | 0,871 | 0,57874 | 1,058 | 0,13855707 | 0,824 |  |  |  |  | 1,023 | 0,967 | 1,174 | -17,6320 |
| ID: 0408 | 312 | 0,16020029 | 0,846 | 0,26643 | 0,889 | 0,66660309 | 0,952 |  |  |  |  | 0,878 | 0,988 | 1,038 | -4,8170  |
| ID: 0409 | 313 | 0,10177867 | 0,860 | 0,03477 | 0,839 | 0,6936277  | 1,025 |  |  |  |  | 0,929 | 1,107 | 1,080 | 2,5000   |
| ID: 0410 | 314 | 0,13156923 | 0,879 | 0,12597 | 0,856 | 0,64113363 | 1,027 |  |  |  |  | 0,9   | 1,052 | 1,024 | 2,7344   |
| ID: 0411 | 315 | 0,09943947 | 1,177 | 0,06489 | 1,237 | 0,51741207 | 0,951 |  |  |  |  | 0,991 | 0,801 | 0,842 | -4,8694  |
| ID: 0412 | 316 | 0,6018775  | 0,866 | 0,04195 | 0,772 | 0,4675807  | 1,121 |  |  |  |  | 0,856 | 1,109 | 0,989 | 12,1335  |
| ID: 0413 | 317 | 0,1179491  | 0,901 | 0,00272 | 0,832 | 0,14226085 | 1,083 |  |  |  |  | 0,919 | 1,105 | 1,020 | 8,3333   |
| ID: 0414 | 318 | 0,83554876 | 0,961 | 0,25489 | 1,134 | 0,27850461 | 0,848 |  |  |  |  | 1,047 | 0,923 | 1,089 | -15,2433 |
| ID: 0415 | 319 | 0,06414853 | 0,878 | 0,16512 | 0,885 | 0,87919327 | 0,992 |  |  |  |  | 0,932 | 1,053 | 1,061 | -0,7540  |
| ID: 0417 | 320 | 0,37081718 | 0,919 | 0,05439 | 0,821 | 0,27336162 | 1,118 |  |  |  |  | 1,071 | 1,304 | 1,166 | 11,8353  |
| ID: 0418 | 321 | 0,19146287 | 0,959 | 0,25771 | 0,956 | 0,92006916 | 1,003 |  |  |  |  | 0,937 | 0,98  | 0,977 | 0,3071   |
| ID: 0419 | 322 | 0,71483647 | 0,947 | 0,8775  | 0,995 | 0,78571907 | 0,952 |  |  |  |  | 1,085 | 1,091 | 1,146 | -4,7993  |
| ID: 0421 | 323 | 0,32771635 | 0,965 | 0,31574 | 0,958 | 0,84358362 | 1,007 |  |  |  |  | 0,943 | 0,984 | 0,977 | 0,7165   |
| ID: 0422 | 324 | 0,27481737 | 0,951 | 0,01693 | 0,888 | 0,07452768 | 1,070 |  |  |  |  | 1,082 | 1,218 | 1,138 | 7,0299   |
| ID: 0423 | 325 | 0,11361347 | 0,856 | 0,17572 | 0,887 | 0,73068101 | 0,966 |  |  |  |  | 0,877 | 0,989 | 1,024 | -3,4180  |
| ID: 0424 | 326 | 0,10914285 | 1,150 | 0,33057 | 1,158 | 0,7953325  | 0,993 |  |  |  |  | 1,155 | 0,997 | 1,004 | -0,6972  |
| ID: 0425 | 327 | 0,63409437 | 0,974 | 0,2481  | 0,954 | 0,65101068 | 1,021 |  |  |  |  | 1,037 | 1,087 | 1,065 | 2,0657   |
| ID: 0426 | 328 | 0,31561603 | 0,952 | 0,20502 | 0,913 | 0,39583198 | 1,044 |  |  |  |  | 1,002 | 1,098 | 1,052 | 4,3726   |
| ID: 0429 | 329 | 0,2110821  | 0,925 | 0,02578 | 0,863 | 0,11602862 | 1,071 |  |  |  |  | 0,992 | 1,149 | 1,073 | 7,0829   |
| ID: 0430 | 330 | 0,3484046  | 1,058 | 0,99747 | 1,000 | 0,35108869 | 1,058 |  |  |  |  | 1,023 | 1,023 | 0,967 | 5,7911   |
| ID: 0431 | 331 | 0,3512349  | 1,048 | 0,57114 | 0,981 | 0,2608812  | 1,068 |  |  |  |  | 0,98  | 0,999 | 0,935 | 6,8449   |
| ID: 0432 | 332 | 0,73657877 | 0,990 | 0,55148 | 0,971 | 0,55373267 | 1,019 |  |  |  |  | 0,97  | 0,999 | 0,98  | 1,9388   |
| ID: 0433 | 333 | 0,53887901 | 1,047 | 0,2522  | 0,899 | 0,13507338 | 1,164 |  |  |  |  | 1,071 | 1,191 | 1,023 | 16,4223  |
| ID: 0434 | 334 | 0,38525291 | 1,053 | 0,00331 | 1,079 | 0,75663368 | 0,975 |  |  |  |  | 0,982 | 0,91  | 0,933 | -2,4652  |
| ID: 0435 | 335 | 0,85081814 | 1,010 | 0,73151 | 1,017 | 0,93129601 | 0,994 |  |  |  |  | 0,982 | 0,966 | 0,972 | -0,6173  |
| ID: 0437 | 336 | 0,28928152 | 0,955 | 0,36862 | 0,936 | 0,73828729 | 1,020 |  |  |  |  | 0,842 | 0,9   | 0,882 | 2,0408   |
| ID: 0438 | 337 | 0,43988356 | 1,038 | 0,88351 | 0,993 | 0,43289864 | 1,045 |  |  |  |  | 1,018 | 1,025 | 0,981 | 4,4852   |
| ID: 0439 | 338 | 0,30568101 | 0,921 | 0,4219  | 0,922 | 0,95298807 | 0,999 |  |  |  |  | 0,938 | 1,017 | 1,018 | -0,0982  |
| ID: 0440 | 339 | 0,26048943 | 0,923 | 0,03868 | 0,856 | 0,24268116 | 1,078 |  |  |  |  | 1,038 | 1,212 | 1,124 | 7,8292   |
| ID: 0441 | 340 | 0,41001325 | 0,930 | 0,30411 | 0,962 | 0,73514814 | 0,967 |  |  |  |  | 1,027 | 1,068 | 1,104 | -3,2609  |
| ID: 0442 | 341 | 0,21559654 | 1,130 | 0,72503 | 1,039 | 0,58184302 | 1,088 |  |  |  |  | 0,876 | 0,843 | 0,775 | 8,7742   |
| ID: 0443 | 342 | 0,08747671 | 1,131 | 0,11258 | 1,141 | 0,90485742 | 0,991 |  |  |  |  | 1,030 | 0,903 | 0,911 | -0,8782  |
| ID: 0444 | 343 | 0,34544297 | 0,877 | 0,80083 | 0,963 | 0,54156749 | 0,911 |  |  |  |  | 0,904 | 0,939 | 1,031 | -8,9234  |
| ID: 0445 | 344 | 0,56196604 | 1,041 | 0,52932 | 0,948 | 0,17766949 | 1,097 |  |  |  |  | 0,973 | 1,026 | 0,935 | 9,7326   |
| ID: 0446 | 345 | 0,28783022 | 1,078 | 0,83964 | 1,018 | 0,45060521 | 1,059 |  |  |  |  | 1,023 | 1,005 | 0,949 | 5,9009   |
| ID: 0447 | 346 | 0,04613388 | 1,339 | 0,10033 | 1,355 | 0,85898574 | 0,989 |  |  |  |  | 1,173 | 0,866 | 0,876 | -1,1416  |
| ID: 0448 | 347 | 0,1635168  | 0,838 | 0,0303  | 0,889 | 0,69363003 | 0,943 |  |  |  |  | 0,88  | 0,99  | 1,050 | -5,7143  |
| ID: 0449 | 348 | 0,90430897 | 1,008 | 0,85035 | 0,992 | 0,75410164 | 1,017 |  |  |  |  | 1,069 | 1,078 | 1,060 | 1,6981   |

|          |     |            |       |         |       |            |       |  |  |  |  |       |       |       |          |
|----------|-----|------------|-------|---------|-------|------------|-------|--|--|--|--|-------|-------|-------|----------|
| ID: 0450 | 349 | 0,95495356 | 0,997 | 0,14706 | 0,849 | 0,10724525 | 1,174 |  |  |  |  | 0,961 | 1,132 | 0,964 | 17,4274  |
| ID: 0451 | 350 | 0,75794726 | 0,983 | 0,72447 | 0,950 | 0,81853617 | 1,034 |  |  |  |  | 0,8   | 0,842 | 0,814 | 3,4398   |
| ID: 0452 | 351 | 0,84307751 | 0,964 | 0,40439 | 1,111 | 0,35238566 | 0,868 |  |  |  |  | 0,969 | 0,872 | 1,005 | -13,2338 |
| ID: 0453 | 352 | 0,27387178 | 1,155 | 0,20254 | 1,230 | 0,63982254 | 0,939 |  |  |  |  | 1,113 | 0,905 | 0,964 | -6,1203  |
| ID: 0454 | 353 | 0,37556883 | 0,761 | 0,79883 | 0,927 | 0,5384293  | 0,822 |  |  |  |  | 0,87  | 0,939 | 1,143 | -17,8478 |
| ID: 0455 | 354 | 0,38365046 | 1,040 | 0,99833 | 0,995 | 0,55775175 | 1,046 |  |  |  |  | 1,140 | 1,146 | 1,096 | 4,5620   |
| ID: 0457 | 355 | 0,42102215 | 0,885 | 0,30861 | 1,132 | 0,13532361 | 0,782 |  |  |  |  | 1,010 | 0,892 | 1,141 | -21,8230 |
| ID: 0459 | 356 | 0,30971714 | 0,825 | 0,55168 | 0,849 | 0,80295573 | 0,971 |  |  |  |  | 0,824 | 0,97  | 0,999 | -2,9029  |
| ID: 0460 | 357 | 0,68819703 | 0,911 | 0,85992 | 0,987 | 0,75722777 | 0,923 |  |  |  |  | 0,934 | 0,946 | 1,025 | -7,7073  |
| ID: 0461 | 358 | 0,87217203 | 0,979 | 0,46355 | 0,850 | 0,48596015 | 1,152 |  |  |  |  | 0,962 | 1,132 | 0,983 | 15,1577  |
| ID: 0462 | 359 | 0,61381437 | 0,956 | 0,89972 | 1,023 | 0,44842147 | 0,935 |  |  |  |  | 0,857 | 0,838 | 0,896 | -6,4732  |
| ID: 0464 | 360 | 0,38693491 | 0,906 | 0,69451 | 0,938 | 0,74513914 | 0,967 |  |  |  |  | 0,93  | 0,992 | 1,026 | -3,3138  |
| ID: 0465 | 361 | 0,03754975 | 0,813 | 0,00346 | 0,674 | 0,02440354 | 1,207 |  |  |  |  | 0,763 | 1,132 | 0,938 | 20,6823  |
| ID: 0468 | 362 | 0,20320743 | 1,098 | 0,48902 | 1,056 | 0,71577183 | 1,040 |  |  |  |  | 1,111 | 1,052 | 1,012 | 3,9526   |
| ID: 0470 | 363 | 0,60873352 | 1,024 | 0,26001 | 1,073 | 0,40252394 | 0,954 |  |  |  |  | 0,912 | 0,85  | 0,891 | -4,6016  |
| ID: 0471 | 364 | 0,89772763 | 0,988 | 0,47307 | 0,938 | 0,53575074 | 1,054 |  |  |  |  | 0,756 | 0,806 | 0,765 | 5,3595   |
| ID: 0472 | 365 | 0,71469291 | 1,017 | 0,3533  | 0,955 | 0,24321603 | 1,065 |  |  |  |  | 1,091 | 1,143 | 1,073 | 6,5238   |
| ID: 0474 | 366 | 0,84463114 | 1,010 | 0,88302 | 1,008 | 0,91742411 | 1,002 |  |  |  |  | 1,036 | 1,028 | 1,026 | 0,1949   |
| ID: 0476 | 367 | 0,87132458 | 1,010 | 0,33821 | 1,067 | 0,49792538 | 0,946 |  |  |  |  | 0,952 | 0,892 | 0,943 | -5,4083  |
| ID: 0477 | 368 | 0,16131951 | 0,866 | 0,07802 | 0,720 | 0,28762452 | 1,203 |  |  |  |  | 0,809 | 1,124 | 0,934 | 20,3426  |
| ID: 0478 | 369 | 0,81794874 | 0,984 | 0,26556 | 0,933 | 0,40618436 | 1,055 |  |  |  |  | 1,094 | 1,173 | 1,112 | 5,4856   |
| ID: 0479 | 370 | 0,77160285 | 1,019 | 0,01812 | 1,194 | 0,23719066 | 0,853 |  |  |  |  | 1,069 | 0,895 | 1,049 | -14,6806 |
| ID: 0480 | 371 | 0,59997571 | 0,954 | 0,11175 | 1,168 | 0,0798706  | 0,817 |  |  |  |  | 0,985 | 0,843 | 1,032 | -18,3140 |
| ID: 0481 | 372 | 0,05260902 | 0,750 | 0,45746 | 1,081 | 0,02207219 | 0,694 |  |  |  |  | 0,916 | 0,847 | 1,221 | -30,6306 |
| ID: 0482 | 373 | 0,63321346 | 1,022 | 0,02034 | 1,187 | 0,03167167 | 0,861 |  |  |  |  | 1,173 | 0,988 | 1,148 | -13,9373 |
| ID: 0483 | 374 | 0,09369816 | 0,763 | 0,65437 | 0,854 | 0,45681849 | 0,893 |  |  |  |  | 0,959 | 1,123 | 1,257 | -10,6603 |
| ID: 0484 | 375 | 0,75140314 | 1,020 | 0,22129 | 1,086 | 0,07812104 | 0,939 |  |  |  |  | 1,032 | 0,95  | 1,012 | -6,1265  |
| ID: 0485 | 376 | 0,07953757 | 0,908 | 0,12829 | 0,897 | 0,78109425 | 1,012 |  |  |  |  | 0,96  | 1,070 | 1,057 | 1,2299   |
| ID: 0486 | 377 | 0,84942304 | 1,015 | 0,33865 | 1,262 | 0,302897   | 0,804 |  |  |  |  | 1,049 | 0,831 | 1,033 | -19,5547 |
| ID: 0487 | 378 | 0,34705793 | 1,154 | 0,55826 | 1,078 | 0,6119298  | 1,071 |  |  |  |  | 1,234 | 1,145 | 1,069 | 7,1094   |
| ID: 0488 | 379 | 0,95550934 | 1,007 | 0,50926 | 1,076 | 0,4839817  | 0,936 |  |  |  |  | 0,862 | 0,801 | 0,856 | -6,4252  |
| ID: 0489 | 380 | 0,6253585  | 0,937 | 0,74753 | 1,040 | 0,43280882 | 0,901 |  |  |  |  | 1,156 | 1,112 | 1,234 | -9,8865  |
| ID: 0490 | 381 | 0,30386962 | 0,912 | 0,6864  | 0,967 | 0,47877649 | 0,943 |  |  |  |  | 0,847 | 0,876 | 0,929 | -5,7051  |
| ID: 0491 | 382 | 0,04206997 | 1,905 | 0,00625 | 2,967 | 0,19331734 | 0,642 |  |  |  |  | 1,617 | 0,545 | 0,849 | -35,8068 |
| ID: 0492 | 383 | 0,03162374 | 0,896 | 0,07056 | 0,900 | 0,88797075 | 0,995 |  |  |  |  | 0,962 | 1,069 | 1,074 | -0,4655  |
| ID: 0493 | 384 | 0,37759211 | 0,955 | 0,12159 | 0,912 | 0,23170318 | 1,047 |  |  |  |  | 1,036 | 1,136 | 1,085 | 4,7005   |
| ID: 0494 | 385 | 0,45740005 | 1,032 | 0,08017 | 1,111 | 0,21989232 | 0,929 |  |  |  |  | 1,073 | 0,966 | 1,040 | -7,1154  |
| ID: 0495 | 386 | 0,84803464 | 0,984 | 0,46126 | 1,098 | 0,22817378 | 0,897 |  |  |  |  | 0,799 | 0,728 | 0,812 | -10,3448 |
| ID: 0496 | 387 | 0,15334196 | 1,074 | 0,11164 | 1,141 | 0,41113942 | 0,942 |  |  |  |  | 1,213 | 1,063 | 1,129 | -5,8459  |
| ID: 0497 | 388 | 0,1609006  | 0,958 | 0,44332 | 1,027 | 0,06746236 | 0,933 |  |  |  |  | 1,045 | 1,018 | 1,091 | -6,6911  |

|          |     |            |       |         |       |            |       |  |  |  |  |       |       |       |          |
|----------|-----|------------|-------|---------|-------|------------|-------|--|--|--|--|-------|-------|-------|----------|
| ID: 0498 | 389 | 0,63262399 | 0,970 | 0,77211 | 1,025 | 0,46774314 | 0,946 |  |  |  |  | 0,903 | 0,881 | 0,931 | -5,3706  |
| ID: 0499 | 390 | 0,7431217  | 0,957 | 0,17194 | 1,261 | 0,06081134 | 0,759 |  |  |  |  | 0,793 | 0,629 | 0,829 | -24,1255 |
| ID: 0500 | 391 | 0,73450163 | 0,980 | 0,70113 | 1,038 | 0,47794793 | 0,944 |  |  |  |  | 1,102 | 1,062 | 1,125 | -5,6000  |
| ID: 0501 | 392 | 0,90883844 | 1,084 | 0,18525 | 1,597 | 0,06507149 | 0,678 |  |  |  |  | 1,075 | 0,673 | 0,992 | -32,1573 |
| ID: 0503 | 393 | 0,00046717 | 0,837 | 0,05461 | 0,870 | 0,47122864 | 0,961 |  |  |  |  | 0,911 | 1,047 | 1,089 | -3,8567  |
| ID: 0504 | 394 | 0,70419922 | 0,975 | 0,09555 | 0,875 | 0,09283788 | 1,114 |  |  |  |  | 1,048 | 1,198 | 1,075 | 11,4419  |
| ID: 0507 | 395 | 0,44709533 | 0,918 | 0,24163 | 0,867 | 0,64081936 | 1,059 |  |  |  |  | 0,765 | 0,882 | 0,833 | 5,8824   |
| ID: 0509 | 396 | 0,04261237 | 0,862 | 0,164   | 0,876 | 0,703685   | 0,985 |  |  |  |  | 1,085 | 1,239 | 1,258 | -1,5103  |
| ID: 0510 | 397 | 0,21953374 | 0,926 | 0,01453 | 0,815 | 0,1262192  | 1,136 |  |  |  |  | 0,823 | 1,010 | 0,889 | 13,6108  |
| ID: 0511 | 398 | 0,57211341 | 0,953 | 0,60215 | 0,955 | 0,98338074 | 0,998 |  |  |  |  | 0,918 | 0,961 | 0,963 | -0,2077  |
| ID: 0512 | 399 | 0,2161033  | 0,914 | 0,03416 | 0,827 | 0,05993614 | 1,105 |  |  |  |  | 1,007 | 1,218 | 1,102 | 10,5263  |
| ID: 0515 | 400 | 0,05835929 | 0,859 | 0,12209 | 0,879 | 0,67965927 | 0,978 |  |  |  |  | 1,001 | 1,139 | 1,165 | -2,2318  |
| ID: 0516 | 401 | 0,59153772 | 0,938 | 0,01713 | 0,791 | 0,11610798 | 1,186 |  |  |  |  | 0,821 | 1,038 | 0,875 | 18,6286  |
| ID: 0517 | 402 | 0,10075684 | 1,224 | 0,85141 | 1,019 | 0,12213607 | 1,201 |  |  |  |  | 1,061 | 1,041 | 0,867 | 20,0692  |
| ID: 0518 | 403 | 0,12386225 | 1,227 | 0,67113 | 1,050 | 0,32567903 | 1,168 |  |  |  |  | 1,007 | 0,959 | 0,821 | 16,8088  |
| ID: 0519 | 404 | 0,03498446 | 0,849 | 0,19276 | 0,909 | 0,36054944 | 0,934 |  |  |  |  | 0,966 | 1,063 | 1,138 | -6,5905  |
| ID: 0520 | 405 | 0,3500703  | 0,857 | 0,41002 | 0,918 | 0,71291425 | 0,934 |  |  |  |  | 0,83  | 0,904 | 0,968 | -6,6116  |
| ID: 0521 | 406 | 0,52602899 | 0,882 | 0,42593 | 1,201 | 0,28226301 | 0,735 |  |  |  |  | 0,682 | 0,568 | 0,773 | -26,5201 |
| ID: 0522 | 407 | 0,06571492 | 1,069 | 0,36217 | 1,039 | 0,50885205 | 1,029 |  |  |  |  | 1,065 | 1,025 | 0,996 | 2,9116   |
| ID: 0523 | 408 | 0,29922569 | 0,881 | 0,43026 | 1,118 | 0,04483967 | 0,788 |  |  |  |  | 1,048 | 0,937 | 1,189 | -21,1943 |
| ID: 0524 | 409 | 0,47319847 | 1,085 | 0,65055 | 1,051 | 0,88590142 | 1,033 |  |  |  |  | 1,101 | 1,048 | 1,015 | 3,2512   |
| ID: 0525 | 410 | 0,73842079 | 0,989 | 0,92433 | 0,986 | 0,9481353  | 1,003 |  |  |  |  | 0,899 | 0,912 | 0,909 | 0,3300   |
| ID: 0526 | 411 | 0,83687698 | 1,004 | 0,66921 | 0,973 | 0,70350738 | 1,032 |  |  |  |  | 1,122 | 1,153 | 1,117 | 3,2229   |
| ID: 0528 | 412 | 0,43689176 | 0,970 | 0,14267 | 0,929 | 0,18360192 | 1,043 |  |  |  |  | 1,026 | 1,104 | 1,058 | 4,3478   |
| ID: 0529 | 413 | 0,1983601  | 0,763 | 0,49126 | 0,824 | 0,70006229 | 0,926 |  |  |  |  | 0,769 | 0,933 | 1,008 | -7,4405  |
| ID: 0530 | 414 | 0,3574597  | 0,772 | 0,17053 | 1,058 | 0,24533232 | 0,730 |  |  |  |  | 0,909 | 0,859 | 1,177 | -27,0178 |
| ID: 0531 | 415 | 0,13649193 | 1,085 | 0,16416 | 1,082 | 0,95308079 | 1,003 |  |  |  |  | 1,008 | 0,932 | 0,929 | 0,3229   |
| ID: 0532 | 416 | 0,43785702 | 0,947 | 0,07988 | 0,937 | 0,82025188 | 1,010 |  |  |  |  | 0,922 | 0,984 | 0,974 | 1,0267   |
| ID: 0533 | 417 | 0,00052687 | 0,602 | 0,01338 | 0,611 | 0,78106045 | 0,985 |  |  |  |  | 0,687 | 1,125 | 1,142 | -1,4886  |
| ID: 0534 | 418 | 0,22348104 | 1,040 | 0,62506 | 0,985 | 0,1314955  | 1,056 |  |  |  |  | 0,979 | 0,994 | 0,941 | 5,6323   |
| ID: 0535 | 419 | 0,36498218 | 1,107 | 0,47842 | 1,051 | 0,63703874 | 1,053 |  |  |  |  | 1,076 | 1,024 | 0,972 | 5,3498   |
| ID: 0536 | 420 | 0,43035447 | 1,055 | 0,19493 | 1,111 | 0,48823908 | 0,949 |  |  |  |  | 1,001 | 0,901 | 0,949 | -5,0580  |
| ID: 0537 | 421 | 0,83259799 | 0,946 | 0,19123 | 1,146 | 0,28439885 | 0,825 |  |  |  |  | 1,077 | 0,94  | 1,139 | -17,4715 |
| ID: 0538 | 422 | 0,13590265 | 0,856 | 0,32601 | 0,867 | 0,84838308 | 0,987 |  |  |  |  | 0,782 | 0,902 | 0,914 | -1,3129  |
| ID: 0540 | 423 | 0,18125651 | 1,368 | 0,55742 | 1,123 | 0,61828686 | 1,218 |  |  |  |  | 1,222 | 1,088 | 0,893 | 21,8365  |
| ID: 0541 | 424 | 0,70479767 | 0,976 | 0,04182 | 0,915 | 0,28941515 | 1,067 |  |  |  |  | 1,008 | 1,102 | 1,033 | 6,6796   |
| ID: 0542 | 425 | 0,29012162 | 1,154 | 0,04732 | 1,305 | 0,45599631 | 0,884 |  |  |  |  | 0,855 | 0,655 | 0,741 | -11,6059 |
| ID: 0543 | 426 | 0,40697114 | 0,895 | 0,6292  | 1,043 | 0,30452717 | 0,858 |  |  |  |  | 0,821 | 0,787 | 0,917 | -14,1767 |
| ID: 0544 | 427 | 0,0898203  | 0,668 | 0,68869 | 0,950 | 0,13395631 | 0,703 |  |  |  |  | 0,781 | 0,822 | 1,170 | -29,7436 |
| ID: 0545 | 428 | 0,73449188 | 1,029 | 0,47077 | 1,068 | 0,57355441 | 0,963 |  |  |  |  | 1,065 | 0,997 | 1,035 | -3,6715  |

|          |     |            |       |         |       |            |       |  |  |  |  |       |       |       |          |
|----------|-----|------------|-------|---------|-------|------------|-------|--|--|--|--|-------|-------|-------|----------|
| ID: 0546 | 429 | 0,02309073 | 0,794 | 0,27398 | 0,876 | 0,32222287 | 0,906 |  |  |  |  | 0,827 | 0,944 | 1,042 | -9,4050  |
| ID: 0547 | 430 | 0,77240104 | 0,929 | 0,10297 | 0,838 | 0,40340113 | 1,109 |  |  |  |  | 0,94  | 1,122 | 1,012 | 10,8696  |
| ID: 0548 | 431 | 0,5081022  | 0,929 | 0,72558 | 1,037 | 0,26913187 | 0,896 |  |  |  |  | 0,867 | 0,836 | 0,933 | -10,3966 |
| ID: 0549 | 432 | 0,03476353 | 0,930 | 0,10284 | 0,906 | 0,6072613  | 1,026 |  |  |  |  | 1,042 | 1,150 | 1,121 | 2,5870   |
| ID: 0550 | 433 | 0,87479925 | 1,001 | 0,17858 | 0,902 | 0,39157008 | 1,110 |  |  |  |  | 0,898 | 0,996 | 0,897 | 11,0368  |
| ID: 0551 | 434 | 0,00573868 | 0,616 | 0,02696 | 0,645 | 0,64939985 | 0,955 |  |  |  |  | 0,667 | 1,034 | 1,083 | -4,5245  |
| ID: 0555 | 435 | 0,31535858 | 1,151 | 0,20993 | 1,156 | 0,91583834 | 0,996 |  |  |  |  | 0,861 | 0,745 | 0,748 | -0,4011  |
| ID: 0556 | 436 | 0,25674854 | 0,964 | 0,26865 | 0,947 | 0,62626943 | 1,019 |  |  |  |  | 1,081 | 1,142 | 1,121 | 1,8733   |
| ID: 0557 | 437 | 0,22018824 | 1,148 | 0,08208 | 1,342 | 0,3155149  | 0,856 |  |  |  |  | 1,153 | 0,859 | 1,004 | -14,4422 |
| ID: 0558 | 438 | 0,76970614 | 1,014 | 0,22457 | 1,155 | 0,53764418 | 0,878 |  |  |  |  | 0,925 | 0,801 | 0,912 | -12,1711 |
| ID: 0559 | 439 | 0,20338415 | 1,074 | 0,37821 | 1,061 | 0,83936923 | 1,013 |  |  |  |  | 1,069 | 1,008 | 0,995 | 1,3065   |
| ID: 0560 | 440 | 0,10127869 | 0,945 | 0,00025 | 0,855 | 0,01329671 | 1,106 |  |  |  |  | 0,965 | 1,129 | 1,021 | 10,5779  |
| ID: 0561 | 441 | 0,92398279 | 0,987 | 0,58631 | 1,051 | 0,55463519 | 0,939 |  |  |  |  | 0,89  | 0,847 | 0,902 | -6,0976  |
| ID: 0562 | 442 | 0,95789694 | 0,999 | 0,46178 | 1,054 | 0,28104976 | 0,948 |  |  |  |  | 1,012 | 0,96  | 1,013 | -5,2320  |
| ID: 0563 | 443 | 0,51441585 | 1,030 | 0,56025 | 1,025 | 0,91289133 | 1,004 |  |  |  |  | 0,966 | 0,942 | 0,938 | 0,4264   |
| ID: 0564 | 444 | 0,25568755 | 0,793 | 0,09281 | 1,408 | 0,00735117 | 0,563 |  |  |  |  | 0,963 | 0,684 | 1,214 | -43,6573 |
| ID: 0565 | 445 | 0,43705991 | 0,966 | 0,93297 | 0,991 | 0,62226011 | 0,975 |  |  |  |  | 1,056 | 1,066 | 1,093 | -2,4703  |
| ID: 0566 | 446 | 0,11835214 | 1,291 | 0,08442 | 1,262 | 0,79397803 | 1,024 |  |  |  |  | 1,090 | 0,864 | 0,844 | 2,3697   |
| ID: 0567 | 447 | 0,50474962 | 1,072 | 0,35447 | 0,932 | 0,2863426  | 1,151 |  |  |  |  | 0,954 | 1,024 | 0,89  | 15,0562  |
| ID: 0568 | 448 | 0,14243615 | 1,283 | 0,01127 | 1,391 | 0,78632884 | 0,923 |  |  |  |  | 1,132 | 0,814 | 0,882 | -7,7098  |
| ID: 0569 | 449 | 0,08449895 | 1,165 | 0,01856 | 1,195 | 0,78552357 | 0,975 |  |  |  |  | 1,017 | 0,851 | 0,873 | -2,5200  |
| ID: 0570 | 450 | 0,50095709 | 1,016 | 0,93903 | 1,001 | 0,74534372 | 1,015 |  |  |  |  | 1,128 | 1,127 | 1,110 | 1,5315   |
| ID: 0571 | 451 | 0,93241895 | 0,994 | 0,70722 | 0,979 | 0,78366481 | 1,016 |  |  |  |  | 1,143 | 1,168 | 1,150 | 1,5652   |
| ID: 0572 | 452 | 0,74197225 | 0,982 | 0,88988 | 1,005 | 0,71665196 | 0,978 |  |  |  |  | 0,891 | 0,887 | 0,907 | -2,2051  |
| ID: 0573 | 453 | 0,52918325 | 0,894 | 0,72386 | 0,961 | 0,71410674 | 0,930 |  |  |  |  | 0,921 | 0,958 | 1,030 | -6,9903  |
| ID: 0574 | 454 | 0,52409744 | 0,799 | 0,57578 | 0,924 | 0,75229559 | 0,865 |  |  |  |  | 0,886 | 0,959 | 1,109 | -13,5257 |
| ID: 0575 | 455 | 0,6948532  | 1,036 | 0,70512 | 1,038 | 0,8649323  | 0,998 |  |  |  |  | 1,003 | 0,966 | 0,968 | -0,2066  |
| ID: 0576 | 456 | 0,71998498 | 0,990 | 0,04328 | 0,899 | 0,02388196 | 1,102 |  |  |  |  | 1,022 | 1,137 | 1,032 | 10,1744  |
| ID: 0577 | 457 | 0,01873459 | 1,139 | 0,13687 | 1,133 | 0,99439276 | 1,005 |  |  |  |  | 1,318 | 1,163 | 1,157 | 0,5186   |
| ID: 0578 | 458 | 0,08095735 | 1,374 | 0,29726 | 1,204 | 0,6800559  | 1,142 |  |  |  |  | 1,076 | 0,894 | 0,783 | 14,1762  |
| ID: 0579 | 459 | 0,17353669 | 1,106 | 0,04591 | 1,161 | 0,52694996 | 0,952 |  |  |  |  | 1,043 | 0,898 | 0,943 | -4,7720  |
| ID: 0580 | 460 | 0,10095296 | 1,064 | 0,99995 | 1,001 | 0,03835004 | 1,063 |  |  |  |  | 1,090 | 1,089 | 1,024 | 6,3477   |
| ID: 0581 | 461 | 0,40119942 | 1,048 | 0,25864 | 1,083 | 0,63660875 | 0,967 |  |  |  |  | 1,054 | 0,973 | 1,006 | -3,2803  |
| ID: 0582 | 462 | 0,02579383 | 1,097 | 0,05159 | 1,084 | 0,66630106 | 1,012 |  |  |  |  | 1,034 | 0,954 | 0,943 | 1,1665   |
| ID: 0584 | 463 | 0,68974013 | 1,035 | 0,85335 | 0,985 | 0,56560006 | 1,050 |  |  |  |  | 1,285 | 1,304 | 1,242 | 4,9919   |
| ID: 0585 | 464 | 0,09276807 | 1,538 | 0,02075 | 2,184 | 0,16525912 | 0,704 |  |  |  |  | 1,492 | 0,683 | 0,97  | -29,5876 |
| ID: 0587 | 465 | 0,86437811 | 1,016 | 0,65055 | 1,045 | 0,72826736 | 0,973 |  |  |  |  | 0,926 | 0,886 | 0,911 | -2,7442  |
| ID: 0588 | 466 | 0,50807369 | 1,016 | 0,95604 | 0,998 | 0,43808643 | 1,018 |  |  |  |  | 1,098 | 1,100 | 1,081 | 1,7576   |
| ID: 0589 | 467 | 0,8354723  | 0,978 | 0,24807 | 0,925 | 0,50972086 | 1,057 |  |  |  |  | 1,137 | 1,229 | 1,163 | 5,6750   |
| ID: 0590 | 468 | 0,38155952 | 1,071 | 0,64764 | 1,037 | 0,68306788 | 1,032 |  |  |  |  | 1,197 | 1,154 | 1,118 | 3,2200   |

|          |     |            |       |         |       |            |       |  |  |  |  |       |       |       |          |
|----------|-----|------------|-------|---------|-------|------------|-------|--|--|--|--|-------|-------|-------|----------|
| ID: 0591 | 469 | 0,91175895 | 0,998 | 0,36472 | 1,084 | 0,14190759 | 0,921 |  |  |  |  | 1,069 | 0,986 | 1,071 | -7,9365  |
| ID: 0592 | 470 | 0,2136547  | 0,906 | 0,10101 | 0,864 | 0,52511889 | 1,049 |  |  |  |  | 0,93  | 1,077 | 1,027 | 4,8685   |
| ID: 0593 | 471 | 0,15804754 | 1,143 | 0,43871 | 1,070 | 0,36762369 | 1,068 |  |  |  |  | 0,993 | 0,928 | 0,869 | 6,7894   |
| ID: 0594 | 472 | 0,00259265 | 0,920 | 0,0002  | 0,850 | 0,01335723 | 1,082 |  |  |  |  | 0,892 | 1,050 | 0,97  | 8,2474   |
| ID: 0596 | 473 | 0,55096498 | 0,908 | 0,94102 | 1,004 | 0,53555512 | 0,905 |  |  |  |  | 0,971 | 0,967 | 1,069 | -9,5416  |
| ID: 0597 | 474 | 0,79398525 | 0,993 | 0,11682 | 0,917 | 0,12669735 | 1,083 |  |  |  |  | 1,018 | 1,110 | 1,025 | 8,2927   |
| ID: 0598 | 475 | 0,00029512 | 2,531 | 0,01158 | 2,113 | 0,45570428 | 1,198 |  |  |  |  | 1,587 | 0,751 | 0,627 | 19,7767  |
| ID: 0599 | 476 | 0,21774512 | 1,041 | 0,09267 | 1,061 | 0,52336115 | 0,981 |  |  |  |  | 1,068 | 1,007 | 1,026 | -1,8519  |
| ID: 0600 | 477 | 0,61864755 | 1,105 | 0,79311 | 1,072 | 0,69996885 | 1,031 |  |  |  |  | 0,965 | 0,9   | 0,873 | 3,0928   |
| ID: 0601 | 478 | 0,19249073 | 1,619 | 0,0754  | 2,227 | 0,42888481 | 0,727 |  |  |  |  | 1,392 | 0,625 | 0,86  | -27,3256 |
| ID: 0603 | 479 | 0,29113302 | 1,152 | 0,27273 | 1,205 | 0,75816426 | 0,957 |  |  |  |  | 0,877 | 0,728 | 0,761 | -4,3364  |
| ID: 0604 | 480 | 0,60200096 | 1,059 | 0,19698 | 0,871 | 0,04937303 | 1,217 |  |  |  |  | 1,091 | 1,253 | 1,030 | 21,6505  |
| ID: 0606 | 481 | 0,45975503 | 0,927 | 0,10451 | 0,866 | 0,45839727 | 1,071 |  |  |  |  | 1,074 | 1,240 | 1,158 | 7,0812   |
| ID: 0608 | 482 | 0,05451184 | 0,908 | 0,09073 | 0,895 | 0,71831865 | 1,014 |  |  |  |  | 0,949 | 1,060 | 1,045 | 1,4354   |
| ID: 0609 | 483 | 0,33793447 | 0,959 | 0,3793  | 0,965 | 0,90172587 | 0,994 |  |  |  |  | 1,126 | 1,167 | 1,174 | -0,5963  |
| ID: 0610 | 484 | 0,29362167 | 0,960 | 0,05062 | 0,939 | 0,50293488 | 1,022 |  |  |  |  | 1,096 | 1,167 | 1,142 | 2,1891   |
| ID: 0611 | 485 | 0,21944287 | 1,422 | 0,05056 | 1,806 | 0,48549226 | 0,788 |  |  |  |  | 1,246 | 0,69  | 0,876 | -21,2329 |
| ID: 0612 | 486 | 0,64988058 | 0,981 | 0,37511 | 0,935 | 0,50834695 | 1,048 |  |  |  |  | 1,159 | 1,239 | 1,182 | 4,8223   |
| ID: 0613 | 487 | 0,13929111 | 0,941 | 0,26751 | 0,941 | 0,97899638 | 1,000 |  |  |  |  | 1,045 | 1,111 | 1,111 | 0,0000   |
| ID: 0614 | 488 | 0,86877764 | 0,984 | 0,50742 | 0,936 | 0,63501701 | 1,050 |  |  |  |  | 1,074 | 1,147 | 1,092 | 5,0366   |
| ID: 0615 | 489 | 0,65353488 | 0,989 | 0,24036 | 0,940 | 0,27451779 | 1,052 |  |  |  |  | 1,082 | 1,151 | 1,094 | 5,2102   |
| ID: 0616 | 490 | 0,59438411 | 0,963 | 0,18483 | 0,936 | 0,62624197 | 1,029 |  |  |  |  | 1,012 | 1,081 | 1,051 | 2,8544   |
| ID: 0617 | 491 | 0,26278536 | 0,960 | 0,24692 | 0,939 | 0,59784165 | 1,023 |  |  |  |  | 1,100 | 1,172 | 1,146 | 2,2688   |
| ID: 0618 | 492 | 0,51246096 | 0,970 | 0,21476 | 0,950 | 0,53131919 | 1,021 |  |  |  |  | 1,074 | 1,130 | 1,107 | 2,0777   |
| ID: 0619 | 493 | 0,42513214 | 0,842 | 0,2812  | 1,254 | 0,09708589 | 0,672 |  |  |  |  | 0,904 | 0,721 | 1,073 | -32,8052 |
| ID: 0620 | 494 | 0,06376282 | 0,686 | 0,38541 | 0,851 | 0,23258371 | 0,806 |  |  |  |  | 0,721 | 0,847 | 1,051 | -19,4101 |
| ID: 0622 | 495 | 0,85253469 | 0,988 | 0,69957 | 0,965 | 0,79264709 | 1,023 |  |  |  |  | 1,201 | 1,244 | 1,216 | 2,3026   |
| ID: 0623 | 496 | 0,62629623 | 0,960 | 0,20295 | 1,197 | 0,01007541 | 0,802 |  |  |  |  | 0,887 | 0,741 | 0,924 | -19,8052 |
| ID: 0625 | 497 | 0,78177051 | 1,017 | 0,99104 | 0,999 | 0,78338634 | 1,018 |  |  |  |  | 1,102 | 1,103 | 1,084 | 1,7528   |
| ID: 0627 | 498 | 0,10278132 | 0,868 | 0,347   | 0,881 | 0,81904409 | 0,986 |  |  |  |  | 0,936 | 1,063 | 1,078 | -1,3915  |
| ID: 0628 | 499 | 0,37349343 | 0,974 | 0,24989 | 0,965 | 0,7717026  | 1,009 |  |  |  |  | 1,035 | 1,073 | 1,063 | 0,9407   |
| ID: 0629 | 500 | 0,40271497 | 0,884 | 0,95584 | 1,005 | 0,33751449 | 0,880 |  |  |  |  | 0,742 | 0,738 | 0,839 | -12,0381 |
| ID: 0630 | 501 | 0,40837212 | 0,936 | 0,65082 | 0,954 | 0,70867967 | 0,981 |  |  |  |  | 1,170 | 1,226 | 1,250 | -1,9200  |
| ID: 0631 | 502 | 0,31025696 | 1,206 | 0,03487 | 1,474 | 0,56983557 | 0,818 |  |  |  |  | 0,837 | 0,568 | 0,694 | -18,1556 |
| ID: 0632 | 503 | 0,37561782 | 0,950 | 0,38749 | 0,960 | 0,88222086 | 0,990 |  |  |  |  | 1,114 | 1,161 | 1,173 | -1,0230  |
| ID: 0633 | 504 | 0,4581791  | 1,079 | 0,5792  | 1,059 | 0,81406507 | 1,019 |  |  |  |  | 1,130 | 1,067 | 1,047 | 1,9102   |
| ID: 0635 | 505 | 0,29647697 | 1,253 | 0,10427 | 1,360 | 0,99470552 | 0,922 |  |  |  |  | 0,703 | 0,517 | 0,561 | -7,8431  |
| ID: 0636 | 506 | 0,13990333 | 1,254 | 0,0447  | 1,378 | 0,39213038 | 0,910 |  |  |  |  | 0,853 | 0,619 | 0,68  | -8,9706  |
| ID: 0637 | 507 | 0,15314664 | 0,960 | 0,01735 | 0,926 | 0,08785203 | 1,037 |  |  |  |  | 1,076 | 1,162 | 1,121 | 3,6574   |
| ID: 0638 | 508 | 0,20318587 | 1,223 | 0,55128 | 1,108 | 0,41501876 | 1,104 |  |  |  |  | 1,235 | 1,115 | 1,010 | 10,3960  |



|          |     |            |       |         |       |            |       |  |  |  |  |       |       |       |          |
|----------|-----|------------|-------|---------|-------|------------|-------|--|--|--|--|-------|-------|-------|----------|
| ID: 0639 | 509 | 0,15073651 | 0,949 | 0,04693 | 0,912 | 0,23304492 | 1,040 |  |  |  |  | 1,020 | 1,118 | 1,075 | 4,0000   |
| ID: 0640 | 510 | 0,73670507 | 1,015 | 0,89192 | 1,007 | 0,86060538 | 1,009 |  |  |  |  | 1,074 | 1,067 | 1,058 | 0,8507   |
| ID: 0641 | 511 | 0,36860579 | 0,946 | 0,40364 | 0,975 | 0,65844541 | 0,971 |  |  |  |  | 1,059 | 1,086 | 1,119 | -2,9491  |
| ID: 0642 | 512 | 0,23015726 | 1,095 | 0,13508 | 1,133 | 0,7010446  | 0,966 |  |  |  |  | 1,019 | 0,899 | 0,931 | -3,4372  |
| ID: 0643 | 513 | 0,80253135 | 0,983 | 0,99407 | 0,997 | 0,82694172 | 0,986 |  |  |  |  | 1,086 | 1,089 | 1,105 | -1,4480  |
| ID: 0645 | 514 | 0,89625736 | 1,007 | 0,95445 | 1,004 | 0,93075217 | 1,004 |  |  |  |  | 1,091 | 1,087 | 1,083 | 0,3693   |
| ID: 0646 | 515 | 0,82617162 | 1,019 | 0,83402 | 1,018 | 0,94778077 | 1,001 |  |  |  |  | 0,742 | 0,729 | 0,728 | 0,1374   |
| ID: 0647 | 516 | 0,74863026 | 1,017 | 0,64003 | 0,961 | 0,45941264 | 1,058 |  |  |  |  | 1,048 | 1,090 | 1,030 | 5,8252   |
| ID: 0648 | 517 | 0,8069907  | 0,986 | 0,80947 | 0,977 | 0,94225821 | 1,009 |  |  |  |  | 0,867 | 0,887 | 0,879 | 0,9101   |
| ID: 0649 | 518 | 0,37998924 | 1,087 | 0,37703 | 0,918 | 0,10468972 | 1,184 |  |  |  |  | 1,214 | 1,322 | 1,117 | 18,3527  |
| ID: 0650 | 519 | 0,61285262 | 1,033 | 0,65816 | 1,034 | 0,95002422 | 0,998 |  |  |  |  | 1,140 | 1,102 | 1,104 | -0,1812  |
| ID: 0651 | 520 | 0,74454451 | 1,018 | 0,7428  | 1,018 | 0,97065148 | 1,000 |  |  |  |  | 1,059 | 1,040 | 1,040 | 0,0000   |
| ID: 0652 | 521 | 0,89599665 | 1,007 | 0,75948 | 1,018 | 0,8594904  | 0,989 |  |  |  |  | 0,887 | 0,871 | 0,881 | -1,1351  |
| ID: 0653 | 522 | 0,4235108  | 1,037 | 0,52821 | 1,032 | 0,93238743 | 1,004 |  |  |  |  | 0,933 | 0,904 | 0,9   | 0,4444   |
| ID: 0654 | 523 | 0,82389733 | 1,015 | 0,54055 | 1,038 | 0,70424094 | 0,978 |  |  |  |  | 1,049 | 1,011 | 1,034 | -2,2244  |
| ID: 0655 | 524 | 0,23997497 | 1,086 | 0,1299  | 1,083 | 0,91164236 | 1,002 |  |  |  |  | 0,951 | 0,878 | 0,876 | 0,2283   |
| ID: 0656 | 525 | 0,49054749 | 0,947 | 0,88818 | 1,014 | 0,35457255 | 0,934 |  |  |  |  | 1,007 | 0,993 | 1,063 | -6,5851  |
| ID: 0657 | 526 | 0,2663128  | 0,887 | 0,3819  | 0,907 | 0,8006384  | 0,977 |  |  |  |  | 1,020 | 1,124 | 1,150 | -2,2609  |
| ID: 0658 | 527 | 0,47175556 | 1,064 | 0,14661 | 1,141 | 0,47102892 | 0,932 |  |  |  |  | 0,92  | 0,806 | 0,865 | -6,8208  |
| ID: 0659 | 528 | 0,66037339 | 1,025 | 0,67575 | 1,026 | 0,97933961 | 0,999 |  |  |  |  | 0,872 | 0,85  | 0,851 | -0,1175  |
| ID: 0660 | 529 | 0,1712827  | 0,892 | 0,1344  | 0,966 | 0,34342543 | 0,924 |  |  |  |  | 1,086 | 1,124 | 1,217 | -7,6417  |
| ID: 0661 | 530 | 0,84546783 | 1,071 | 0,40305 | 1,238 | 0,31107191 | 0,865 |  |  |  |  | 0,848 | 0,685 | 0,792 | -13,5101 |
| ID: 0662 | 531 | 0,54701178 | 0,975 | 0,05575 | 0,937 | 0,26431719 | 1,040 |  |  |  |  | 1,132 | 1,208 | 1,161 | 4,0482   |
| ID: 0663 | 532 | 0,34280536 | 0,925 | 0,54149 | 0,925 | 0,94901787 | 1,000 |  |  |  |  | 0,994 | 1,075 | 1,075 | 0,0000   |
| ID: 0664 | 533 | 0,03256689 | 0,913 | 0,05594 | 0,872 | 0,36243203 | 1,047 |  |  |  |  | 1,093 | 1,253 | 1,197 | 4,6784   |
| ID: 0665 | 534 | 0,34072599 | 0,866 | 0,1998  | 1,159 | 0,07690998 | 0,747 |  |  |  |  | 1,012 | 0,873 | 1,168 | -25,2568 |
| ID: 0666 | 535 | 0,52067874 | 1,037 | 0,64987 | 1,039 | 0,89766157 | 0,998 |  |  |  |  | 1,044 | 1,005 | 1,007 | -0,1986  |
| ID: 0667 | 536 | 0,78533125 | 0,987 | 0,82108 | 0,979 | 0,9551227  | 1,009 |  |  |  |  | 0,685 | 0,7   | 0,694 | 0,8646   |
| ID: 0668 | 537 | 0,41396467 | 1,111 | 0,03528 | 1,295 | 0,28685183 | 0,858 |  |  |  |  | 1,040 | 0,803 | 0,936 | -14,2094 |
| ID: 0669 | 538 | 0,62620785 | 0,945 | 0,98545 | 1,003 | 0,60131844 | 0,942 |  |  |  |  | 1,012 | 1,009 | 1,071 | -5,7890  |
| ID: 0670 | 539 | 0,20096908 | 0,954 | 0,03852 | 0,897 | 0,15415313 | 1,063 |  |  |  |  | 1,088 | 1,213 | 1,141 | 6,3103   |
| ID: 0671 | 540 | 0,33395346 | 0,928 | 0,22596 | 0,899 | 0,6933308  | 1,032 |  |  |  |  | 1,019 | 1,133 | 1,098 | 3,1876   |
| ID: 0672 | 541 | 0,21042853 | 0,856 | 0,25089 | 0,862 | 0,96030068 | 0,992 |  |  |  |  | 0,989 | 1,147 | 1,156 | -0,7785  |
| ID: 0673 | 542 | 0,83649423 | 1,009 | 0,55336 | 1,041 | 0,69047889 | 0,969 |  |  |  |  | 1,112 | 1,068 | 1,102 | -3,0853  |
| ID: 0674 | 543 | 0,24923086 | 0,857 | 0,82454 | 0,970 | 0,36155025 | 0,883 |  |  |  |  | 0,947 | 0,976 | 1,105 | -11,6742 |
| ID: 0675 | 544 | 0,89896681 | 0,988 | 0,28397 | 0,907 | 0,29974094 | 1,090 |  |  |  |  | 1,111 | 1,225 | 1,124 | 8,9858   |
| ID: 0676 | 545 | 0,73334715 | 1,015 | 0,04899 | 1,104 | 0,16918689 | 0,919 |  |  |  |  | 1,093 | 0,99  | 1,077 | -8,0780  |
| ID: 0677 | 546 | 0,35504702 | 0,805 | 0,05339 | 0,615 | 0,23621064 | 1,308 |  |  |  |  | 0,89  | 1,447 | 1,106 | 30,8318  |
| ID: 0678 | 547 | 0,81557533 | 1,009 | 0,66681 | 0,982 | 0,57358178 | 1,027 |  |  |  |  | 1,058 | 1,077 | 1,049 | 2,6692   |
| ID: 0679 | 548 | 0,29613382 | 1,180 | 0,12937 | 1,307 | 0,45547968 | 0,903 |  |  |  |  | 1,270 | 0,972 | 1,076 | -9,6654  |

|          |     |            |       |         |       |            |       |  |  |  |  |       |       |       |          |
|----------|-----|------------|-------|---------|-------|------------|-------|--|--|--|--|-------|-------|-------|----------|
| ID: 0680 | 549 | 0,35690797 | 1,070 | 0,00669 | 1,203 | 0,19580848 | 0,890 |  |  |  |  | 1,330 | 1,106 | 1,243 | -11,0217 |
| ID: 0681 | 550 | 0,94755533 | 0,997 | 0,34883 | 0,915 | 0,29588909 | 1,090 |  |  |  |  | 1,043 | 1,140 | 1,046 | 8,9866   |
| ID: 0682 | 551 | 0,46082077 | 1,076 | 0,8654  | 0,988 | 0,3568158  | 1,089 |  |  |  |  | 1,104 | 1,117 | 1,026 | 8,8694   |
| ID: 0683 | 552 | 0,02015029 | 1,111 | 0,73006 | 1,018 | 0,08834042 | 1,091 |  |  |  |  | 1,232 | 1,210 | 1,109 | 9,1073   |
| ID: 0685 | 553 | 0,30042938 | 1,043 | 0,92666 | 0,995 | 0,23211724 | 1,048 |  |  |  |  | 1,104 | 1,109 | 1,058 | 4,8204   |
| ID: 0687 | 554 | 0,75133394 | 0,981 | 0,66134 | 0,968 | 0,83471609 | 1,013 |  |  |  |  | 1,036 | 1,070 | 1,056 | 1,3258   |
| ID: 0688 | 555 | 0,84600405 | 1,015 | 0,42036 | 1,062 | 0,30182978 | 0,956 |  |  |  |  | 0,958 | 0,902 | 0,944 | -4,4492  |
| ID: 0689 | 556 | 0,94175336 | 0,995 | 0,88432 | 1,010 | 0,82327969 | 0,986 |  |  |  |  | 1,045 | 1,035 | 1,050 | -1,4286  |
| ID: 0690 | 557 | 0,2895187  | 0,905 | 0,59878 | 1,067 | 0,10914993 | 0,848 |  |  |  |  | 0,997 | 0,934 | 1,102 | -15,2450 |
| ID: 0692 | 558 | 0,71044569 | 1,012 | 0,29835 | 0,960 | 0,10357229 | 1,053 |  |  |  |  | 1,044 | 1,087 | 1,032 | 5,3295   |
| ID: 0693 | 559 | 0,57920851 | 1,048 | 0,20643 | 1,114 | 0,52716141 | 0,941 |  |  |  |  | 1,064 | 0,955 | 1,015 | -5,9113  |
| ID: 0695 | 560 | 0,87830789 | 0,995 | 0,88887 | 1,014 | 0,66831348 | 0,981 |  |  |  |  | 1,058 | 1,043 | 1,063 | -1,8815  |
| ID: 0696 | 561 | 0,13873608 | 1,041 | 0,66227 | 0,973 | 0,20196302 | 1,070 |  |  |  |  | 1,131 | 1,162 | 1,086 | 6,9982   |
| ID: 0697 | 562 | 0,93054758 | 1,014 | 0,55631 | 0,958 | 0,28320639 | 1,059 |  |  |  |  | 1,067 | 1,114 | 1,052 | 5,8935   |
| ID: 0698 | 563 | 0,53980395 | 0,977 | 0,92006 | 0,984 | 0,83954467 | 0,993 |  |  |  |  | 1,015 | 1,032 | 1,039 | -0,6737  |
| ID: 0699 | 564 | 0,3601542  | 1,096 | 0,30471 | 1,132 | 0,49047274 | 0,968 |  |  |  |  | 1,166 | 1,030 | 1,064 | -3,1955  |
| ID: 0700 | 565 | 0,23393144 | 1,152 | 0,20689 | 1,102 | 0,59171346 | 1,045 |  |  |  |  | 1,101 | 0,999 | 0,956 | 4,4979   |
| ID: 0702 | 566 | 0,95801278 | 0,983 | 0,87553 | 1,007 | 0,85808263 | 0,976 |  |  |  |  | 0,982 | 0,975 | 0,999 | -2,4024  |
| ID: 0703 | 567 | 0,64202028 | 1,015 | 0,30019 | 0,948 | 0,15934369 | 1,070 |  |  |  |  | 1,067 | 1,125 | 1,051 | 7,0409   |
| ID: 0704 | 568 | 0,05360709 | 1,184 | 0,00795 | 1,303 | 0,31891785 | 0,908 |  |  |  |  | 1,134 | 0,87  | 0,958 | -9,1858  |
| ID: 0706 | 569 | 0,54890154 | 0,931 | 0,29559 | 1,220 | 0,05972405 | 0,763 |  |  |  |  | 0,848 | 0,695 | 0,911 | -23,7102 |
| ID: 0707 | 570 | 0,52933165 | 0,979 | 0,71417 | 0,970 | 0,94972131 | 1,009 |  |  |  |  | 0,911 | 0,939 | 0,931 | 0,8593   |
| ID: 0708 | 571 | 0,5680275  | 1,070 | 0,58617 | 1,076 | 0,92071516 | 0,995 |  |  |  |  | 1,024 | 0,952 | 0,957 | -0,5225  |
| ID: 0709 | 572 | 0,56174268 | 1,037 | 0,7692  | 1,017 | 0,82989974 | 1,019 |  |  |  |  | 1,048 | 1,030 | 1,011 | 1,8793   |
| ID: 0710 | 573 | 0,01313826 | 1,107 | 0,19506 | 1,095 | 0,92195324 | 1,011 |  |  |  |  | 1,087 | 0,993 | 0,982 | 1,1202   |
| ID: 0711 | 574 | 0,36240589 | 1,042 | 0,00596 | 1,082 | 0,44816107 | 0,963 |  |  |  |  | 1,106 | 1,022 | 1,061 | -3,6758  |
| ID: 0712 | 575 | 0,72380626 | 1,033 | 0,9668  | 1,008 | 0,65971415 | 1,024 |  |  |  |  | 0,979 | 0,971 | 0,948 | 2,4262   |
| ID: 0713 | 576 | 0,47112753 | 1,094 | 0,17525 | 1,139 | 0,86522405 | 0,960 |  |  |  |  | 1,023 | 0,898 | 0,935 | -3,9572  |
| ID: 0714 | 577 | 0,13316913 | 1,116 | 0,7946  | 0,979 | 0,12801747 | 1,140 |  |  |  |  | 0,988 | 1,009 | 0,885 | 14,0113  |
| ID: 0715 | 578 | 0,72636884 | 0,993 | 0,06214 | 0,936 | 0,03130855 | 1,062 |  |  |  |  | 1,061 | 1,134 | 1,068 | 6,1798   |
| ID: 0716 | 579 | 0,51917178 | 0,750 | 0,04296 | 1,194 | 0,21494682 | 0,628 |  |  |  |  | 0,875 | 0,733 | 1,167 | -37,1894 |
| ID: 0718 | 580 | 0,82391449 | 1,023 | 0,30531 | 1,162 | 0,44253895 | 0,881 |  |  |  |  | 1,012 | 0,871 | 0,989 | -11,9312 |
| ID: 0719 | 581 | 0,72093615 | 1,044 | 0,50745 | 1,078 | 0,87515625 | 0,968 |  |  |  |  | 0,992 | 0,92  | 0,95  | -3,1579  |
| ID: 0721 | 582 | 0,14835828 | 1,102 | 0,01137 | 1,243 | 0,02531813 | 0,886 |  |  |  |  | 1,028 | 0,827 | 0,933 | -11,3612 |
| ID: 0722 | 583 | 0,48334752 | 1,076 | 0,31318 | 1,184 | 0,43636719 | 0,909 |  |  |  |  | 1,029 | 0,869 | 0,956 | -9,1004  |
| ID: 0723 | 584 | 0,94993924 | 0,977 | 0,27165 | 1,279 | 0,23602318 | 0,763 |  |  |  |  | 0,957 | 0,748 | 0,98  | -23,6735 |
| ID: 0724 | 585 | 0,66729653 | 1,058 | 0,30872 | 1,148 | 0,54587675 | 0,922 |  |  |  |  | 1,015 | 0,884 | 0,959 | -7,8206  |
| ID: 0725 | 586 | 0,99114148 | 0,993 | 0,75496 | 1,022 | 0,75756048 | 0,971 |  |  |  |  | 0,932 | 0,912 | 0,939 | -2,8754  |
| ID: 0726 | 587 | 0,11992928 | 1,057 | 0,08097 | 1,099 | 0,29489523 | 0,962 |  |  |  |  | 1,022 | 0,93  | 0,967 | -3,8263  |
| ID: 0727 | 588 | 0,28853011 | 1,078 | 0,46143 | 1,086 | 0,83425673 | 0,992 |  |  |  |  | 0,996 | 0,917 | 0,924 | -0,7576  |

|          |     |            |       |         |       |            |       |  |  |  |  |       |       |       |          |
|----------|-----|------------|-------|---------|-------|------------|-------|--|--|--|--|-------|-------|-------|----------|
| ID: 0728 | 589 | 0,81233804 | 0,848 | 0,1006  | 1,325 | 0,23505016 | 0,640 |  |  |  |  | 0,942 | 0,711 | 1,111 | -36,0036 |
| ID: 0729 | 590 | 0,1321785  | 0,892 | 0,15669 | 0,917 | 0,66827809 | 0,973 |  |  |  |  | 0,982 | 1,071 | 1,101 | -2,7248  |
| ID: 0731 | 591 | 0,69216172 | 0,985 | 0,401   | 0,959 | 0,62896989 | 1,026 |  |  |  |  | 1,089 | 1,135 | 1,106 | 2,6221   |
| ID: 0733 | 592 | 0,41381131 | 1,024 | 0,18576 | 1,033 | 0,83819049 | 0,992 |  |  |  |  | 1,008 | 0,976 | 0,984 | -0,8130  |
| ID: 0734 | 593 | 0,1519524  | 1,206 | 0,03196 | 1,377 | 0,14004075 | 0,876 |  |  |  |  | 1,071 | 0,778 | 0,888 | -12,3874 |
| ID: 0735 | 594 | 0,70401835 | 1,022 | 0,70914 | 1,023 | 0,99428223 | 0,999 |  |  |  |  | 0,898 | 0,878 | 0,879 | -0,1138  |
| ID: 0736 | 595 | 0,71941178 | 1,008 | 0,43804 | 0,976 | 0,31386112 | 1,034 |  |  |  |  | 0,96  | 0,984 | 0,952 | 3,3613   |
| ID: 0737 | 596 | 0,69468438 | 1,046 | 0,08482 | 1,240 | 0,14597592 | 0,844 |  |  |  |  | 0,864 | 0,697 | 0,826 | -15,6174 |
| ID: 0738 | 597 | 0,34493562 | 1,121 | 0,17588 | 1,221 | 0,58356002 | 0,918 |  |  |  |  | 1,067 | 0,874 | 0,952 | -8,1933  |
| ID: 0739 | 598 | 0,15790612 | 0,928 | 0,05004 | 0,881 | 0,27502221 | 1,053 |  |  |  |  | 1,152 | 1,307 | 1,241 | 5,3183   |
| ID: 0740 | 599 | 0,45482401 | 0,956 | 0,12096 | 0,908 | 0,25197203 | 1,053 |  |  |  |  | 1,150 | 1,267 | 1,203 | 5,3200   |
| ID: 0741 | 600 | 0,77840242 | 1,031 | 0,76393 | 0,972 | 0,50648418 | 1,061 |  |  |  |  | 0,957 | 0,985 | 0,928 | 6,1422   |
| ID: 0742 | 601 | 0,85232912 | 1,006 | 0,01249 | 0,866 | 0,11590532 | 1,162 |  |  |  |  | 1,040 | 1,201 | 1,034 | 16,1509  |
| ID: 0743 | 602 | 0,10768036 | 1,216 | 0,40028 | 1,112 | 0,35000782 | 1,093 |  |  |  |  | 0,872 | 0,784 | 0,717 | 9,3445   |
| ID: 0744 | 603 | 0,82151986 | 0,899 | 0,68315 | 0,886 | 0,89301965 | 1,015 |  |  |  |  | 1,017 | 1,148 | 1,131 | 1,5031   |
| ID: 0745 | 604 | 0,25706918 | 1,035 | 0,84893 | 1,008 | 0,37289039 | 1,027 |  |  |  |  | 1,091 | 1,082 | 1,054 | 2,6565   |
| ID: 0746 | 605 | 0,84139931 | 0,994 | 0,36235 | 1,059 | 0,25106465 | 0,939 |  |  |  |  | 1,133 | 1,070 | 1,140 | -6,1404  |
| ID: 0747 | 606 | 0,68088695 | 1,050 | 0,83109 | 1,009 | 0,93020138 | 1,040 |  |  |  |  | 1,038 | 1,029 | 0,989 | 4,0445   |
| ID: 0748 | 607 | 0,3044887  | 1,058 | 0,02279 | 1,106 | 0,43681592 | 0,957 |  |  |  |  | 1,057 | 0,956 | 0,999 | -4,3043  |
| ID: 0749 | 608 | 0,80946705 | 0,989 | 0,59942 | 1,026 | 0,42172996 | 0,965 |  |  |  |  | 1,034 | 1,008 | 1,045 | -3,5407  |
| ID: 0750 | 609 | 0,31713865 | 0,922 | 0,7839  | 0,982 | 0,26615388 | 0,939 |  |  |  |  | 1,159 | 1,180 | 1,257 | -6,1257  |
| ID: 0752 | 610 | 0,26595326 | 0,814 | 0,20612 | 0,869 | 0,78317562 | 0,937 |  |  |  |  | 0,861 | 0,991 | 1,058 | -6,3327  |
| ID: 0753 | 611 | 0,99994037 | 0,992 | 0,13579 | 1,140 | 0,21939393 | 0,870 |  |  |  |  | 0,885 | 0,776 | 0,892 | -13,0045 |
| ID: 0754 | 612 | 0,52305043 | 1,063 | 0,61298 | 0,956 | 0,29961037 | 1,112 |  |  |  |  | 1,033 | 1,081 | 0,972 | 11,2140  |
| ID: 0755 | 613 | 0,70169469 | 1,020 | 0,98559 | 0,996 | 0,73165845 | 1,024 |  |  |  |  | 1,047 | 1,051 | 1,026 | 2,4366   |
| ID: 0756 | 614 | 0,52065093 | 1,056 | 0,31035 | 1,093 | 0,67327781 | 0,966 |  |  |  |  | 1,081 | 0,989 | 1,024 | -3,4180  |
| ID: 0757 | 615 | 0,36605017 | 1,081 | 0,09275 | 1,246 | 0,30988627 | 0,868 |  |  |  |  | 0,948 | 0,761 | 0,877 | -13,2269 |
| ID: 0759 | 616 | 0,83941912 | 0,979 | 0,65387 | 0,951 | 0,77458585 | 1,029 |  |  |  |  | 1,413 | 1,486 | 1,444 | 2,9086   |
| ID: 0760 | 617 | 0,76323817 | 0,990 | 0,75295 | 1,013 | 0,61693632 | 0,977 |  |  |  |  | 0,943 | 0,931 | 0,953 | -2,3085  |
| ID: 0761 | 618 | 0,88337481 | 1,008 | 0,78992 | 1,017 | 0,96542093 | 0,992 |  |  |  |  | 0,975 | 0,959 | 0,967 | -0,8273  |
| ID: 0762 | 619 | 0,6370037  | 0,986 | 0,09609 | 0,943 | 0,11001132 | 1,045 |  |  |  |  | 1,171 | 1,242 | 1,188 | 4,5455   |
| ID: 0763 | 620 | 0,63343663 | 0,986 | 0,08821 | 0,923 | 0,04651789 | 1,068 |  |  |  |  | 1,053 | 1,141 | 1,068 | 6,8352   |
| ID: 0764 | 621 | 0,37309615 | 1,083 | 0,83599 | 0,962 | 0,37149032 | 1,125 |  |  |  |  | 1,202 | 1,249 | 1,110 | 12,5225  |
| ID: 0765 | 622 | 0,03546794 | 1,103 | 0,23081 | 0,929 | 0,00864124 | 1,188 |  |  |  |  | 1,145 | 1,233 | 1,038 | 18,7861  |
| ID: 0766 | 623 | 0,00230074 | 0,941 | 0,00903 | 0,914 | 0,19867663 | 1,030 |  |  |  |  | 1,076 | 1,177 | 1,143 | 2,9746   |
| ID: 0768 | 624 | 0,20930362 | 0,960 | 0,11876 | 0,911 | 0,33703057 | 1,054 |  |  |  |  | 1,069 | 1,174 | 1,114 | 5,3860   |
| ID: 0769 | 625 | 0,00643789 | 0,906 | 0,11886 | 0,907 | 0,94621846 | 0,999 |  |  |  |  | 0,981 | 1,082 | 1,083 | -0,0923  |
| ID: 0770 | 626 | 0,92817959 | 0,995 | 0,41339 | 0,965 | 0,51786674 | 1,032 |  |  |  |  | 1,072 | 1,111 | 1,077 | 3,1569   |
| ID: 0771 | 627 | 0,30066445 | 1,099 | 0,74401 | 0,964 | 0,19987527 | 1,139 |  |  |  |  | 1,081 | 1,121 | 0,984 | 13,9228  |
| ID: 0772 | 628 | 0,95699114 | 1,001 | 0,58516 | 1,046 | 0,6763895  | 0,957 |  |  |  |  | 0,992 | 0,948 | 0,991 | -4,3391  |

|          |     |            |       |         |       |            |       |                                                                                 |   |                  |                                                                           |       |       |       |          |
|----------|-----|------------|-------|---------|-------|------------|-------|---------------------------------------------------------------------------------|---|------------------|---------------------------------------------------------------------------|-------|-------|-------|----------|
| ID: 0773 | 629 | 0,70627673 | 0,971 | 0,22377 | 0,900 | 0,34679639 | 1,079 |                                                                                 |   |                  |                                                                           | 1,105 | 1,228 | 1,138 | 7,9086   |
| ID: 0774 | 630 | 0,2646729  | 1,065 | 0,72522 | 1,026 | 0,6897547  | 1,037 |                                                                                 |   |                  |                                                                           | 1,204 | 1,173 | 1,131 | 3,7135   |
| ID: 0775 | 631 | 0,45241173 | 0,885 | 0,06842 | 0,807 | 0,48855351 | 1,097 |                                                                                 |   |                  |                                                                           | 1,167 | 1,446 | 1,318 | 9,7117   |
| ID: 0776 | 632 | 0,67416855 | 0,976 | 0,56264 | 1,028 | 0,3432673  | 0,949 |                                                                                 |   |                  |                                                                           | 1,016 | 0,988 | 1,041 | -5,0913  |
| ID: 0777 | 633 | 0,0281544  | 1,177 | 0,79355 | 1,012 | 0,31772075 | 1,162 |                                                                                 |   |                  |                                                                           | 1,173 | 1,159 | 0,997 | 16,2487  |
| ID: 0778 | 634 | 0,50956853 | 0,966 | 0,16728 | 0,945 | 0,66754242 | 1,022 |                                                                                 |   |                  |                                                                           | 1,091 | 1,154 | 1,129 | 2,2143   |
| ID: 0779 | 635 | 0,41976504 | 0,973 | 0,19872 | 0,922 | 0,38197917 | 1,055 |                                                                                 |   |                  |                                                                           | 1,074 | 1,165 | 1,104 | 5,5254   |
| ID: 0780 | 636 | 0,74019377 | 0,991 | 0,16283 | 1,060 | 0,09821554 | 0,935 |                                                                                 |   |                  |                                                                           | 1,188 | 1,121 | 1,199 | -6,5054  |
| ID: 0781 | 637 | 0,9706103  | 0,976 | 0,65443 | 0,961 | 0,83091661 | 1,015 |                                                                                 |   |                  |                                                                           | 1,139 | 1,185 | 1,167 | 1,5424   |
| ID: 0782 | 638 | 0,85532048 | 0,966 | 0,84714 | 0,988 | 0,76857506 | 0,978 |                                                                                 |   |                  |                                                                           | 1,008 | 1,020 | 1,043 | -2,2052  |
| ID: 0783 | 639 | 0,38702222 | 0,942 | 0,1052  | 0,898 | 0,3794758  | 1,049 |                                                                                 |   |                  |                                                                           | 0,992 | 1,105 | 1,053 | 4,9383   |
| ID: 0785 | 640 | 0,3067807  | 0,933 | 0,14554 | 0,899 | 0,39639953 | 1,038 |                                                                                 |   |                  |                                                                           | 0,983 | 1,094 | 1,054 | 3,7951   |
| ID: 0786 | 641 | 0,26914906 | 0,941 | 0,22946 | 0,936 | 0,89669909 | 1,005 |                                                                                 |   |                  |                                                                           | 1,171 | 1,251 | 1,245 | 0,4819   |
| ID: 0787 | 642 | 0,04392311 | 0,930 | 0,0069  | 0,915 | 0,63915744 | 1,017 |                                                                                 |   |                  |                                                                           | 1,064 | 1,163 | 1,144 | 1,6608   |
| ID: 0788 | 643 | 0,78746703 | 0,980 | 0,57504 | 0,873 | 0,55059585 | 1,123 |                                                                                 |   |                  |                                                                           | 0,983 | 1,126 | 1,003 | 12,2632  |
| ID: 0789 | 644 | 0,74494441 | 1,020 | 0,68059 | 0,984 | 0,50105159 | 1,037 |                                                                                 |   |                  |                                                                           | 1,173 | 1,192 | 1,150 | 3,6522   |
| ID: 0790 | 645 | 0,29911522 | 1,169 | 0,80082 | 1,040 | 0,43482551 | 1,124 |                                                                                 |   |                  |                                                                           | 0,983 | 0,945 | 0,841 | 12,3662  |
| ID: 0791 | 646 | 0,62773797 | 1,027 | 0,54576 | 1,019 | 0,82766113 | 1,008 |                                                                                 |   |                  |                                                                           | 1,131 | 1,110 | 1,101 | 0,8174   |
| ID: 0792 | 647 | 0,28378995 | 1,055 | 0,27524 | 1,043 | 0,82013394 | 1,012 |                                                                                 |   |                  |                                                                           | 1,176 | 1,128 | 1,115 | 1,1659   |
| ID: 0793 | 648 | 0,05523587 | 0,577 | 0,96749 | 1,013 | 0,04812098 | 0,570 |                                                                                 |   |                  |                                                                           | 0,777 | 0,767 | 1,346 | -43,0163 |
| ID: 0795 | 649 | 0,72015132 | 0,880 | 0,72145 | 0,932 | 0,92220344 | 0,944 |                                                                                 |   |                  |                                                                           | 0,807 | 0,866 | 0,917 | -5,5616  |
| ID: 0796 | 650 | 0,75497482 | 0,855 | 0,25443 | 0,921 | 0,98035291 | 0,928 |                                                                                 |   |                  |                                                                           | 0,949 | 1,030 | 1,110 | -7,2072  |
| ID: 0797 | 651 | 0,72014827 | 0,952 | 0,32835 | 0,890 | 0,52316315 | 1,069 |                                                                                 |   |                  |                                                                           | 1,043 | 1,172 | 1,096 | 6,9343   |
| ID: 0798 | 652 | 0,00029419 | 0,580 | 0,00122 | 0,523 | 0,4572912  | 1,109 |                                                                                 |   |                  |                                                                           | 0,711 | 1,360 | 1,226 | 10,9299  |
| ID: 0799 | 653 | 0,01021517 | 1,239 | 0,06563 | 1,181 | 0,63081455 | 1,049 |                                                                                 |   |                  |                                                                           | 1,163 | 0,985 | 0,939 | 4,8988   |
| ID: 0800 | 654 | 0,90238929 | 1,021 | 0,62494 | 0,948 | 0,52173169 | 1,077 |                                                                                 |   |                  |                                                                           | 0,952 | 1,004 | 0,932 | 7,7253   |
| ID: 0802 | 655 | 0,35154351 | 0,853 | 0,40281 | 0,880 | 0,88201823 | 0,969 |                                                                                 |   |                  |                                                                           | 0,963 | 1,094 | 1,129 | -3,1001  |
| ID: 0803 | 656 | 0,15684745 | 0,787 | 0,90792 | 0,975 | 0,28558832 | 0,808 |                                                                                 |   |                  |                                                                           | 0,728 | 0,747 | 0,925 | -19,2432 |
| ID: 0805 | 657 | 0,0400641  | 0,730 | 0,31966 | 0,793 | 0,5798549  | 0,920 |                                                                                 |   |                  |                                                                           | 0,885 | 1,116 | 1,213 | -7,9967  |
|          |     |            |       |         |       |            |       | Agrotis_qualite_rep_c8395 <br>ORF4 length 445 aa, 1338 bp,<br>from 109..1446 of | 6 | RBNS5_H<br>UMAN  | rabenosyn-5 [Papilio<br>xuthus]                                           | 1,319 | 0,967 | 1,191 | -18,8077 |
|          |     |            |       |         |       |            |       | Agrotis_qualite_rep_c4879 <br>ORF3 length 268 aa, 807 bp,<br>from 42..848 of    | 6 | AL1B1_H<br>UMAN  | aldehyde dehydrogenase<br>X, mitochondrial-like<br>[Amyelois transitella] | 1,319 | 0,967 | 1,191 | -18,8077 |
|          |     |            |       |         |       |            |       | Agrotis_qualite_rep_c275 O<br>RF5 length 543 aa, 1632 bp,<br>from 98..1729 of   | 5 | Q2F5T4_B<br>OMMO | ATP synthase [Bombyx<br>mori]                                             | 1,319 | 0,967 | 1,191 | -18,8077 |

|          |     |            |       |         |       |            |       |                                                                                                              |   |                  |                                                                                           |       |       |       |          |
|----------|-----|------------|-------|---------|-------|------------|-------|--------------------------------------------------------------------------------------------------------------|---|------------------|-------------------------------------------------------------------------------------------|-------|-------|-------|----------|
| ID: 0807 | 658 | 0,26483625 | 1,107 | 0,01002 | 1,364 | 0,01983489 | 0,812 | Agrotis_qualite_rep_c1211 <br>ORF2 length 210 aa, 633 bp,<br>from 1..633 of                                  | 4 | KGM_2135<br>54   | Palmitoyl-protein<br>thioesterase [Danaus<br>plexippus plexippus]                         | 1,319 | 0,967 | 1,191 | -18,8077 |
|          |     |            |       |         |       |            |       | Agrotis_qualite_rep_c275 O<br>RF30 length 59 aa, 180 bp,<br>from 1603..1782 of                               | 3 | Q2F5T4_B<br>OMMO | ATP synthase [Bombyx<br>mori]                                                             | 1,319 | 0,967 | 1,191 | -18,8077 |
|          |     |            |       |         |       |            |       | Agrotis_qualite_rep_c2828 <br>ORF3 length 282 aa, 849 bp,<br>from 168..1016 of<br>Agrotis_qualite_rep_c2828  | 2 | MMSA_HU<br>MAN   | methylmalonate-<br>semialdehyde<br>dehydrogenase [acylating],<br>mitochondrial isoform X2 | 1,319 | 0,967 | 1,191 | -18,8077 |
|          |     |            |       |         |       |            |       | Agrotis_qualite_rep_c2828 <br>ORF17 length 277 aa, 834 bp,<br>from 914..1747 of<br>Agrotis_qualite_rep_c2828 | 2 | MMSA_HU<br>MAN   | methylmalonate-<br>semialdehyde<br>dehydrogenase [acylating],<br>mitochondrial isoform X2 | 1,319 | 0,967 | 1,191 | -18,8077 |
| ID: 0808 | 659 | 0,00955716 | 1,145 | 0,16929 | 1,139 | 0,9610154  | 1,006 |                                                                                                              |   |                  |                                                                                           | 1,213 | 1,065 | 1,059 | 0,5666   |
| ID: 0809 | 660 | 0,58155123 | 1,046 | 0,5864  | 1,057 | 0,88300294 | 0,989 |                                                                                                              |   |                  |                                                                                           | 1,193 | 1,129 | 1,141 | -1,0517  |
| ID: 0810 | 661 | 0,05087733 | 1,173 | 0,0484  | 1,204 | 0,72115185 | 0,974 |                                                                                                              |   |                  |                                                                                           | 1,098 | 0,912 | 0,936 | -2,5641  |
| ID: 0811 | 662 | 0,00214931 | 0,684 | 0,04778 | 0,735 | 0,53714971 | 0,930 |                                                                                                              |   |                  |                                                                                           | 0,85  | 1,156 | 1,243 | -6,9992  |
| ID: 0812 | 663 | 0,36506839 | 0,971 | 0,04289 | 0,923 | 0,19606665 | 1,053 |                                                                                                              |   |                  |                                                                                           | 1,089 | 1,180 | 1,121 | 5,2632   |
| ID: 0813 | 664 | 0,76583198 | 1,024 | 0,14316 | 1,187 | 0,3230892  | 0,863 |                                                                                                              |   |                  |                                                                                           | 0,884 | 0,745 | 0,863 | -13,6732 |
| ID: 0814 | 665 | 0,60424542 | 1,035 | 0,19509 | 1,089 | 0,45334582 | 0,950 |                                                                                                              |   |                  |                                                                                           | 0,974 | 0,894 | 0,941 | -4,9947  |
| ID: 0815 | 666 | 0,81371656 | 1,016 | 0,46552 | 1,054 | 0,61546689 | 0,963 |                                                                                                              |   |                  |                                                                                           | 0,971 | 0,921 | 0,956 | -3,6611  |
| ID: 0816 | 667 | 0,45130629 | 0,948 | 0,14667 | 0,930 | 0,75607163 | 1,019 |                                                                                                              |   |                  |                                                                                           | 1,031 | 1,109 | 1,088 | 1,9301   |
| ID: 0817 | 668 | 0,45863553 | 0,958 | 0,03823 | 0,889 | 0,16024134 | 1,077 |                                                                                                              |   |                  |                                                                                           | 1,141 | 1,283 | 1,191 | 7,7246   |
| ID: 0818 | 669 | 0,46975657 | 1,054 | 0,29889 | 1,097 | 0,69343781 | 0,961 |                                                                                                              |   |                  |                                                                                           | 0,954 | 0,87  | 0,905 | -3,8674  |
| ID: 0819 | 670 | 0,63930091 | 1,062 | 0,17678 | 1,191 | 0,12511836 | 0,892 |                                                                                                              |   |                  |                                                                                           | 1,123 | 0,943 | 1,057 | -10,7852 |
| ID: 0820 | 671 | 0,14235952 | 1,066 | 0,24076 | 1,076 | 0,85780324 | 0,991 |                                                                                                              |   |                  |                                                                                           | 1,157 | 1,075 | 1,085 | -0,9217  |
| ID: 0821 | 672 | 0,4588592  | 0,935 | 0,54994 | 0,962 | 0,75797315 | 0,971 |                                                                                                              |   |                  |                                                                                           | 1,242 | 1,291 | 1,329 | -2,8593  |
| ID: 0822 | 673 | 0,04665322 | 1,226 | 0,95886 | 1,001 | 0,07202045 | 1,225 |                                                                                                              |   |                  |                                                                                           | 1,194 | 1,193 | 0,974 | 22,4846  |
| ID: 0823 | 674 | 0,52102343 | 1,045 | 0,49963 | 1,044 | 0,95808167 | 1,001 |                                                                                                              |   |                  |                                                                                           | 1,153 | 1,104 | 1,103 | 0,0907   |
| ID: 0824 | 675 | 0,09480188 | 0,865 | 0,87256 | 0,976 | 0,19892141 | 0,886 |                                                                                                              |   |                  |                                                                                           | 1,054 | 1,080 | 1,219 | -11,4028 |
| ID: 0825 | 676 | 0,2991491  | 0,976 | 0,19201 | 0,959 | 0,48531079 | 1,018 |                                                                                                              |   |                  |                                                                                           | 1,104 | 1,151 | 1,131 | 1,7683   |
| ID: 0826 | 677 | 0,12692073 | 0,952 | 0,2973  | 0,955 | 0,92883359 | 0,997 |                                                                                                              |   |                  |                                                                                           | 1,114 | 1,167 | 1,170 | -0,2564  |
| ID: 0827 | 678 | 0,75815148 | 1,022 | 0,96242 | 1,000 | 0,82250821 | 1,022 |                                                                                                              |   |                  |                                                                                           | 1,083 | 1,083 | 1,060 | 2,1698   |
| ID: 0828 | 679 | 0,32488341 | 0,967 | 0,81285 | 0,990 | 0,54396165 | 0,977 |                                                                                                              |   |                  |                                                                                           | 1,128 | 1,139 | 1,166 | -2,3156  |
| ID: 0829 | 680 | 0,58552024 | 1,038 | 0,30307 | 0,826 | 0,15105885 | 1,256 |                                                                                                              |   |                  |                                                                                           | 0,931 | 1,127 | 0,897 | 25,6410  |
| ID: 0830 | 681 | 0,81909424 | 0,988 | 0,81703 | 0,981 | 0,941629   | 1,007 |                                                                                                              |   |                  |                                                                                           | 0,927 | 0,945 | 0,938 | 0,7463   |
| ID: 0831 | 682 | 0,16022432 | 0,944 | 0,19689 | 0,858 | 0,38276737 | 1,099 |                                                                                                              |   |                  |                                                                                           | 0,952 | 1,109 | 1,009 | 9,9108   |
| ID: 0832 | 683 | 0,76793935 | 0,976 | 0,25787 | 0,860 | 0,29214075 | 1,136 |                                                                                                              |   |                  |                                                                                           | 0,826 | 0,961 | 0,846 | 13,5934  |
| ID: 0833 | 684 | 0,27742693 | 1,115 | 0,03771 | 1,218 | 0,48155534 | 0,915 |                                                                                                              |   |                  |                                                                                           | 1,146 | 0,941 | 1,028 | -8,4630  |

|          |     |            |       |         |       |            |       |  |  |  |  |       |       |       |          |
|----------|-----|------------|-------|---------|-------|------------|-------|--|--|--|--|-------|-------|-------|----------|
| ID: 0834 | 685 | 0,3291606  | 1,039 | 0,7407  | 0,993 | 0,19628458 | 1,047 |  |  |  |  | 1,159 | 1,167 | 1,115 | 4,6637   |
| ID: 0835 | 686 | 0,24485677 | 1,040 | 0,28955 | 1,049 | 0,78898332 | 0,991 |  |  |  |  | 1,021 | 0,973 | 0,982 | -0,9165  |
| ID: 0836 | 687 | 0,07114572 | 1,363 | 0,49847 | 0,851 | 0,03260594 | 1,601 |  |  |  |  | 0,991 | 1,164 | 0,727 | 60,1100  |
| ID: 0837 | 688 | 0,52439496 | 1,023 | 0,39052 | 1,043 | 0,67927641 | 0,981 |  |  |  |  | 1,118 | 1,072 | 1,093 | -1,9213  |
| ID: 0838 | 689 | 0,9142142  | 0,984 | 0,51256 | 0,952 | 0,67811213 | 1,034 |  |  |  |  | 0,809 | 0,85  | 0,822 | 3,4063   |
| ID: 0839 | 690 | 0,27592498 | 1,065 | 0,02265 | 1,185 | 0,15366923 | 0,899 |  |  |  |  | 0,979 | 0,826 | 0,919 | -10,1197 |
| ID: 0840 | 691 | 0,93219951 | 1,005 | 0,75677 | 1,018 | 0,83101656 | 0,987 |  |  |  |  | 1,069 | 1,050 | 1,064 | -1,3158  |
| ID: 0841 | 692 | 0,5401995  | 1,034 | 0,43628 | 0,949 | 0,22873435 | 1,089 |  |  |  |  | 1,067 | 1,124 | 1,032 | 8,9147   |
| ID: 0842 | 693 | 0,2741239  | 0,918 | 0,28131 | 0,925 | 0,93549224 | 0,992 |  |  |  |  | 1,215 | 1,314 | 1,324 | -0,7553  |
| ID: 0843 | 694 | 0,91738858 | 0,993 | 0,43885 | 1,059 | 0,33849479 | 0,938 |  |  |  |  | 1,004 | 0,948 | 1,011 | -6,2315  |
| ID: 0844 | 695 | 0,85515231 | 0,989 | 0,76951 | 0,985 | 0,86839397 | 1,004 |  |  |  |  | 1,075 | 1,091 | 1,087 | 0,3680   |
| ID: 0845 | 696 | 0,08125219 | 1,190 | 0,31087 | 0,899 | 0,00751398 | 1,323 |  |  |  |  | 1,236 | 1,375 | 1,039 | 32,3388  |
| ID: 0847 | 697 | 0,28769167 | 1,303 | 0,21272 | 1,380 | 0,81564583 | 0,944 |  |  |  |  | 1,283 | 0,93  | 0,985 | -5,5838  |
| ID: 0848 | 698 | 0,85952221 | 0,976 | 0,89004 | 0,989 | 0,94958909 | 0,986 |  |  |  |  | 0,997 | 1,008 | 1,022 | -1,3699  |
| ID: 0850 | 699 | 0,60330641 | 1,033 | 0,3075  | 1,069 | 0,62645655 | 0,966 |  |  |  |  | 1,072 | 1,003 | 1,038 | -3,3719  |
| ID: 0852 | 700 | 0,83292567 | 0,978 | 0,87832 | 0,977 | 0,97891017 | 1,001 |  |  |  |  | 0,933 | 0,955 | 0,954 | 0,1048   |
| ID: 0853 | 701 | 0,85005274 | 1,013 | 0,89566 | 0,985 | 0,76699783 | 1,029 |  |  |  |  | 1,030 | 1,046 | 1,017 | 2,8515   |
| ID: 0854 | 702 | 0,63762825 | 0,877 | 0,09878 | 0,700 | 0,25872877 | 1,254 |  |  |  |  | 0,608 | 0,869 | 0,693 | 25,3968  |
| ID: 0855 | 703 | 0,79949238 | 1,021 | 0,78407 | 0,982 | 0,60955065 | 1,039 |  |  |  |  | 0,939 | 0,956 | 0,92  | 3,9130   |
| ID: 0857 | 704 | 0,99920579 | 1,003 | 0,20071 | 0,920 | 0,08732625 | 1,090 |  |  |  |  | 1,083 | 1,177 | 1,080 | 8,9815   |
| ID: 0859 | 705 | 0,2518341  | 1,211 | 0,17223 | 1,248 | 0,93031794 | 0,970 |  |  |  |  | 0,856 | 0,686 | 0,707 | -2,9703  |
| ID: 0860 | 706 | 0,0205603  | 1,769 | 0,06728 | 1,642 | 0,79686815 | 1,078 |  |  |  |  | 1,617 | 0,985 | 0,914 | 7,7681   |
| ID: 0861 | 707 | 0,15925253 | 1,199 | 0,03874 | 1,343 | 0,36279023 | 0,893 |  |  |  |  | 0,849 | 0,632 | 0,708 | -10,7345 |
| ID: 0862 | 708 | 0,7164915  | 0,986 | 0,80156 | 0,984 | 0,99464436 | 1,002 |  |  |  |  | 0,995 | 1,011 | 1,009 | 0,1982   |
| ID: 0863 | 709 | 0,00061706 | 0,559 | 0,00348 | 0,472 | 0,24719672 | 1,185 |  |  |  |  | 0,608 | 1,289 | 1,088 | 18,4743  |
| ID: 0864 | 710 | 0,93795814 | 1,001 | 0,60709 | 0,941 | 0,59283949 | 1,063 |  |  |  |  | 1,125 | 1,195 | 1,124 | 6,3167   |
| ID: 0865 | 711 | 0,25082073 | 1,131 | 0,02834 | 1,374 | 0,2334631  | 0,823 |  |  |  |  | 0,926 | 0,674 | 0,819 | -17,7045 |
| ID: 0866 | 712 | 0,4301878  | 1,091 | 0,13305 | 1,218 | 0,51580943 | 0,895 |  |  |  |  | 0,927 | 0,761 | 0,85  | -10,4706 |
| ID: 0867 | 713 | 0,80028446 | 0,972 | 0,72946 | 0,978 | 0,99199304 | 0,994 |  |  |  |  | 1,072 | 1,096 | 1,103 | -0,6346  |
| ID: 0868 | 714 | 0,2619905  | 0,872 | 0,45442 | 0,894 | 0,83575438 | 0,976 |  |  |  |  | 0,967 | 1,082 | 1,109 | -2,4346  |
| ID: 0869 | 715 | 0,87427594 | 0,964 | 0,09322 | 1,118 | 0,29734534 | 0,862 |  |  |  |  | 0,881 | 0,788 | 0,914 | -13,7856 |
| ID: 0871 | 716 | 0,62375465 | 0,976 | 0,73365 | 1,014 | 0,51734802 | 0,963 |  |  |  |  | 0,95  | 0,937 | 0,973 | -3,6999  |
| ID: 0872 | 717 | 0,43105295 | 1,110 | 0,04548 | 1,262 | 0,53374951 | 0,879 |  |  |  |  | 0,746 | 0,591 | 0,672 | -12,0536 |
| ID: 0873 | 718 | 0,4304396  | 1,042 | 0,80941 | 0,981 | 0,37228916 | 1,062 |  |  |  |  | 1,070 | 1,091 | 1,027 | 6,2317   |
| ID: 0874 | 719 | 0,60917483 | 0,945 | 0,80574 | 0,960 | 0,85438606 | 0,985 |  |  |  |  | 0,919 | 0,957 | 0,972 | -1,5432  |
| ID: 0875 | 720 | 0,50566309 | 1,028 | 0,13148 | 1,069 | 0,43637862 | 0,962 |  |  |  |  | 1,054 | 0,986 | 1,025 | -3,8049  |
| ID: 0876 | 721 | 0,65852588 | 1,018 | 0,121   | 1,057 | 0,43053007 | 0,964 |  |  |  |  | 1,062 | 1,005 | 1,043 | -3,6433  |
| ID: 0877 | 722 | 0,80747076 | 0,977 | 0,10274 | 0,913 | 0,3534507  | 1,070 |  |  |  |  | 1,008 | 1,104 | 1,032 | 6,9767   |
| ID: 0878 | 723 | 0,18199273 | 0,925 | 0,58852 | 0,941 | 0,73878563 | 0,984 |  |  |  |  | 0,856 | 0,91  | 0,925 | -1,6216  |
| ID: 0879 | 724 | 0,46359471 | 0,947 | 0,83202 | 0,973 | 0,71030415 | 0,973 |  |  |  |  | 0,939 | 0,965 | 0,992 | -2,7218  |

|          |     |            |       |         |       |            |       |                                                                                                   |    |                   |                                                                                              |       |       |       |          |
|----------|-----|------------|-------|---------|-------|------------|-------|---------------------------------------------------------------------------------------------------|----|-------------------|----------------------------------------------------------------------------------------------|-------|-------|-------|----------|
| ID: 0880 | 725 | 0,78544334 | 1,019 | 0,35456 | 1,059 | 0,73609141 | 0,962 |                                                                                                   |    |                   |                                                                                              | 0,965 | 0,911 | 0,947 | -3,8015  |
| ID: 0881 | 726 | 0,799469   | 1,023 | 0,13837 | 1,139 | 0,16906633 | 0,898 |                                                                                                   |    |                   |                                                                                              | 1,038 | 0,911 | 1,015 | -10,2463 |
| ID: 0882 | 727 | 0,1482014  | 1,326 | 0,01265 | 1,536 | 0,6571607  | 0,863 |                                                                                                   |    |                   |                                                                                              | 1,407 | 0,916 | 1,061 | -13,6664 |
| ID: 0883 | 728 | 0,08124713 | 0,788 | 0,00418 | 0,753 | 0,61349088 | 1,046 |                                                                                                   |    |                   |                                                                                              | 0,9   | 1,195 | 1,142 | 4,6410   |
| ID: 0885 | 729 | 0,92995116 | 0,969 | 0,5664  | 1,281 | 0,48401191 | 0,757 |                                                                                                   |    |                   |                                                                                              | 0,538 | 0,42  | 0,555 | -24,3243 |
| ID: 0886 | 730 | 0,29072555 | 0,829 | 0,42202 | 0,837 | 0,91192022 | 0,991 |                                                                                                   |    |                   |                                                                                              | 0,626 | 0,748 | 0,755 | -0,9272  |
| ID: 0887 | 731 | 0,64107956 | 0,984 | 0,26411 | 0,947 | 0,35611846 | 1,040 |                                                                                                   |    |                   |                                                                                              | 1,141 | 1,205 | 1,159 | 3,9689   |
| ID: 0888 | 732 | 0,37011822 | 0,892 | 0,16709 | 1,185 | 0,01866816 | 0,753 |                                                                                                   |    |                   |                                                                                              | 0,903 | 0,762 | 1,012 | -24,7036 |
| ID: 0889 | 733 | 0,3571276  | 1,210 | 0,16824 | 1,342 | 0,64105603 | 0,902 |                                                                                                   |    |                   |                                                                                              | 0,765 | 0,57  | 0,632 | -9,8101  |
| ID: 0890 | 734 | 0,2211015  | 1,088 | 0,24318 | 1,070 | 0,69568716 | 1,016 |                                                                                                   |    |                   |                                                                                              | 1,127 | 1,053 | 1,036 | 1,6409   |
| ID: 0891 | 735 | 0,7117988  | 0,963 | 0,24222 | 0,887 | 0,36398385 | 1,086 |                                                                                                   |    |                   |                                                                                              | 0,837 | 0,944 | 0,869 | 8,6306   |
| ID: 0892 | 736 | 0,80239933 | 1,048 | 0,09383 | 1,577 | 0,16772607 | 0,664 |                                                                                                   |    |                   |                                                                                              | 0,571 | 0,362 | 0,545 | -33,5780 |
| ID: 0893 | 737 | 0,53206539 | 0,953 | 0,62282 | 0,972 | 0,81201087 | 0,981 |                                                                                                   |    |                   |                                                                                              | 1,084 | 1,115 | 1,137 | -1,9349  |
| ID: 0894 | 738 | 0,8415935  | 1,058 | 0,07423 | 1,983 | 0,16023297 | 0,534 |                                                                                                   |    |                   |                                                                                              | 0,837 | 0,422 | 0,791 | -46,6498 |
| ID: 0895 | 739 | 0,23819553 | 1,154 | 0,01245 | 1,400 | 0,14166253 | 0,824 |                                                                                                   |    |                   |                                                                                              | 1,156 | 0,826 | 1,002 | -17,5649 |
| ID: 0896 | 740 | 0,4805615  | 0,922 | 0,16691 | 1,170 | 0,04944585 | 0,788 |                                                                                                   |    |                   |                                                                                              | 0,921 | 0,787 | 0,999 | -21,2212 |
| ID: 0897 | 741 | 0,91605216 | 0,982 | 0,16855 | 1,225 | 0,14680508 | 0,801 |                                                                                                   |    |                   |                                                                                              | 1,066 | 0,87  | 1,086 | -19,8895 |
| ID: 0898 | 742 | 0,23661571 | 1,016 | 0,74165 | 0,984 | 0,40621014 | 1,033 |                                                                                                   |    |                   |                                                                                              | 1,121 | 1,139 | 1,103 | 3,2638   |
| ID: 0899 | 743 | 0,59723667 | 0,908 | 0,01888 | 1,599 | 0,00654017 | 0,568 | Agrotis_qualite_rep_c334 O RF5 length 395 aa, 1188 bp, from 225..1412 of                          | 13 | AOA088M9 K3_AGRSE | Fatty alcohol acetyltransferase Agrotis segetum (Turnip moth)                                | 0,873 | 0,546 | 0,961 | -43,1842 |
|          |     |            |       |         |       |            |       | Agrotis_qualite_rep_c820 O RF15 length 300 aa, 903 bp, from 620..1522 of Agrotis_qualite_rep_c820 | 9  | I4DK27_PAP XU     | Mitochondrial processing peptidase beta subunit Papilio xuthus (Asian swallowtail butterfly) | 0,873 | 0,546 | 0,961 | -43,1842 |
| ID: 0900 | 744 | 0,521839   | 1,045 | 0,28431 | 1,091 | 0,56843966 | 0,958 |                                                                                                   |    |                   |                                                                                              | 0,936 | 0,858 | 0,896 | -4,2411  |
| ID: 0901 | 745 | 0,83591204 | 0,990 | 0,67218 | 1,016 | 0,59448136 | 0,974 |                                                                                                   |    |                   |                                                                                              | 0,953 | 0,938 | 0,963 | -2,5961  |
| ID: 0902 | 746 | 0,04507232 | 1,280 | 0,6423  | 0,636 | 0,243525   | 2,014 |                                                                                                   |    |                   |                                                                                              | 0,923 | 1,452 | 0,721 | 101,3870 |
| ID: 0903 | 747 | 0,31028945 | 0,850 | 0,26084 | 0,836 | 0,88119052 | 1,016 |                                                                                                   |    |                   |                                                                                              | 0,752 | 0,899 | 0,885 | 1,5819   |
| ID: 0905 | 748 | 0,4598275  | 0,963 | 0,82011 | 1,013 | 0,3694802  | 0,951 |                                                                                                   |    |                   |                                                                                              | 1,019 | 1,006 | 1,058 | -4,9149  |
| ID: 0906 | 749 | 0,72761732 | 1,031 | 0,42437 | 1,108 | 0,51062932 | 0,930 |                                                                                                   |    |                   |                                                                                              | 1,109 | 1,001 | 1,076 | -6,9703  |
| ID: 0907 | 750 | 0,59585872 | 0,936 | 0,87791 | 1,047 | 0,39926121 | 0,895 |                                                                                                   |    |                   |                                                                                              | 1,074 | 1,026 | 1,147 | -10,5493 |
| ID: 0908 | 751 | 0,83455516 | 0,990 | 0,78272 | 1,011 | 0,61924814 | 0,980 |                                                                                                   |    |                   |                                                                                              | 1,113 | 1,101 | 1,124 | -2,0463  |
| ID: 0909 | 752 | 0,21588127 | 0,905 | 0,14826 | 0,854 | 0,32329828 | 1,060 |                                                                                                   |    |                   |                                                                                              | 0,864 | 1,012 | 0,955 | 5,9686   |
| ID: 0910 | 753 | 0,64734346 | 1,048 | 0,36849 | 1,088 | 0,83719012 | 0,963 |                                                                                                   |    |                   |                                                                                              | 0,942 | 0,866 | 0,899 | -3,6707  |
| ID: 0911 | 754 | 0,52502162 | 0,918 | 0,78027 | 0,943 | 0,81445303 | 0,973 |                                                                                                   |    |                   |                                                                                              | 0,997 | 1,057 | 1,086 | -2,6703  |
| ID: 0912 | 755 | 0,05381066 | 0,839 | 0,35094 | 1,104 | 0,01146407 | 0,761 |                                                                                                   |    |                   |                                                                                              | 1,119 | 1,014 | 1,333 | -23,9310 |
| ID: 0913 | 756 | 0,7962836  | 0,982 | 0,82414 | 0,987 | 0,96387742 | 0,995 |                                                                                                   |    |                   |                                                                                              | 0,919 | 0,931 | 0,936 | -0,5342  |
| ID: 0914 | 757 | 0,94286571 | 1,001 | 0,06727 | 0,971 | 0,29760049 | 1,031 |                                                                                                   |    |                   |                                                                                              | 0,941 | 0,969 | 0,94  | 3,0851   |
| ID: 0915 | 758 | 0,05696558 | 1,378 | 0,01166 | 1,738 | 0,19897072 | 0,793 |                                                                                                   |    |                   |                                                                                              | 1,192 | 0,686 | 0,865 | -20,6936 |



|          |     |            |       |         |       |            |       |  |  |  |  |       |       |       |          |
|----------|-----|------------|-------|---------|-------|------------|-------|--|--|--|--|-------|-------|-------|----------|
| ID: 0916 | 759 | 0,81433399 | 0,985 | 0,35021 | 1,076 | 0,18590975 | 0,916 |  |  |  |  | 0,995 | 0,925 | 1,010 | -8,4158  |
| ID: 0917 | 760 | 0,93588238 | 0,972 | 0,83216 | 1,008 | 0,83150605 | 0,964 |  |  |  |  | 0,895 | 0,888 | 0,921 | -3,5831  |
| ID: 0918 | 761 | 0,95717331 | 1,001 | 0,48878 | 1,015 | 0,68087333 | 0,986 |  |  |  |  | 0,937 | 0,923 | 0,936 | -1,3889  |
| ID: 0919 | 762 | 0,2016343  | 1,162 | 0,18801 | 1,172 | 0,96752716 | 0,991 |  |  |  |  | 0,884 | 0,754 | 0,761 | -0,9198  |
| ID: 0920 | 763 | 0,72750622 | 0,974 | 0,52999 | 1,130 | 0,11175678 | 0,862 |  |  |  |  | 0,757 | 0,67  | 0,777 | -13,7709 |
| ID: 0921 | 764 | 0,36634103 | 1,059 | 0,34138 | 1,143 | 0,48155538 | 0,926 |  |  |  |  | 1,064 | 0,931 | 1,005 | -7,3632  |
| ID: 0922 | 765 | 0,00041763 | 0,299 | 0,00016 | 0,278 | 0,59447562 | 1,075 |  |  |  |  | 0,315 | 1,132 | 1,053 | 7,5024   |
| ID: 0923 | 766 | 0,95841899 | 0,987 | 0,42295 | 0,843 | 0,4507147  | 1,172 |  |  |  |  | 1,156 | 1,372 | 1,171 | 17,1648  |
| ID: 0924 | 767 | 0,82543475 | 0,935 | 0,55515 | 0,881 | 0,74559523 | 1,061 |  |  |  |  | 1,035 | 1,175 | 1,107 | 6,1427   |
| ID: 0925 | 768 | 0,32677962 | 0,963 | 0,76602 | 0,990 | 0,23949738 | 0,973 |  |  |  |  | 1,133 | 1,145 | 1,177 | -2,7188  |
| ID: 0926 | 769 | 0,29830314 | 1,070 | 0,82613 | 1,018 | 0,4522819  | 1,051 |  |  |  |  | 1,178 | 1,157 | 1,101 | 5,0863   |
| ID: 0928 | 770 | 0,70954993 | 1,013 | 0,21107 | 0,938 | 0,1139065  | 1,080 |  |  |  |  | 1,060 | 1,130 | 1,046 | 8,0306   |
| ID: 0929 | 771 | 0,82158917 | 0,993 | 0,83324 | 0,988 | 0,94419722 | 1,005 |  |  |  |  | 1,071 | 1,084 | 1,079 | 0,4634   |
| ID: 0933 | 772 | 0,91061585 | 0,929 | 0,21832 | 1,306 | 0,45439561 | 0,711 |  |  |  |  | 0,921 | 0,705 | 0,991 | -28,8597 |
| ID: 0934 | 773 | 0,05237962 | 1,188 | 0,80236 | 0,980 | 0,0446352  | 1,213 |  |  |  |  | 1,106 | 1,129 | 0,931 | 21,2675  |
| ID: 0935 | 774 | 0,87433703 | 0,990 | 0,3213  | 1,113 | 0,22584857 | 0,890 |  |  |  |  | 0,988 | 0,888 | 0,998 | -11,0220 |
| ID: 0936 | 775 | 0,27355047 | 0,887 | 0,98867 | 1,014 | 0,12971799 | 0,875 |  |  |  |  | 0,866 | 0,854 | 0,976 | -12,5000 |
| ID: 0938 | 776 | 0,07248537 | 0,841 | 0,94087 | 0,934 | 0,41218782 | 0,901 |  |  |  |  | 0,844 | 0,904 | 1,003 | -9,8704  |
| ID: 0939 | 777 | 0,78181003 | 0,987 | 0,22831 | 0,892 | 0,23309794 | 1,107 |  |  |  |  | 1,044 | 1,171 | 1,058 | 10,6805  |
| ID: 0940 | 778 | 0,85922413 | 0,984 | 0,10717 | 0,875 | 0,18753772 | 1,125 |  |  |  |  | 1,090 | 1,246 | 1,108 | 12,4549  |
| ID: 0942 | 779 | 0,59741904 | 1,017 | 0,64873 | 0,921 | 0,51172725 | 1,104 |  |  |  |  | 1,138 | 1,235 | 1,119 | 10,3664  |
| ID: 0943 | 780 | 0,08901086 | 1,221 | 0,06584 | 1,264 | 0,62039384 | 0,966 |  |  |  |  | 1,106 | 0,875 | 0,906 | -3,4216  |
| ID: 0944 | 781 | 0,44303792 | 0,945 | 0,03504 | 0,741 | 0,03712241 | 1,276 |  |  |  |  | 0,918 | 1,239 | 0,971 | 27,6004  |
| ID: 0945 | 782 | 0,33149849 | 1,042 | 0,66638 | 1,021 | 0,75995543 | 1,021 |  |  |  |  | 1,063 | 1,041 | 1,020 | 2,0588   |
| ID: 0946 | 783 | 0,41412723 | 1,177 | 0,09208 | 2,030 | 0,45782198 | 0,580 |  |  |  |  | 0,619 | 0,305 | 0,526 | -42,0152 |
| ID: 0947 | 784 | 0,04492895 | 1,260 | 0,08671 | 1,313 | 0,67042225 | 0,960 |  |  |  |  | 1,247 | 0,95  | 0,99  | -4,0404  |
| ID: 0948 | 785 | 0,59160942 | 1,283 | 0,46817 | 1,413 | 0,7080004  | 0,908 |  |  |  |  | 0,725 | 0,513 | 0,565 | -9,2035  |
| ID: 0949 | 786 | 0,58165184 | 1,688 | 0,20331 | 3,429 | 0,31834404 | 0,492 |  |  |  |  | 0,336 | 0,098 | 0,199 | -50,7538 |
| ID: 0952 | 787 | 0,54603435 | 1,278 | 0,34936 | 1,466 | 0,5785817  | 0,871 |  |  |  |  | 0,764 | 0,521 | 0,598 | -12,8763 |
| ID: 0953 | 788 | 0,47292053 | 0,890 | 0,17792 | 0,855 | 0,62797608 | 1,042 |  |  |  |  | 0,941 | 1,101 | 1,057 | 4,1627   |
| ID: 0954 | 789 | 0,21134096 | 1,114 | 0,61432 | 0,955 | 0,14125213 | 1,167 |  |  |  |  | 0,986 | 1,033 | 0,885 | 16,7232  |
| ID: 0955 | 790 | 0,12626029 | 1,208 | 0,45583 | 1,091 | 0,35180545 | 1,106 |  |  |  |  | 1,181 | 1,082 | 0,978 | 10,6339  |
| ID: 0956 | 791 | 0,26370069 | 0,936 | 0,35436 | 0,938 | 0,95212127 | 0,998 |  |  |  |  | 1,001 | 1,067 | 1,069 | -0,1871  |
| ID: 0957 | 792 | 0,7689675  | 1,024 | 0,73671 | 0,934 | 0,59974622 | 1,096 |  |  |  |  | 1,072 | 1,148 | 1,047 | 9,6466   |
| ID: 0958 | 793 | 0,32181801 | 1,149 | 0,46848 | 1,097 | 0,59307677 | 1,047 |  |  |  |  | 1,151 | 1,049 | 1,002 | 4,6906   |
| ID: 0959 | 794 | 0,77902695 | 1,295 | 0,20948 | 3,862 | 0,26063121 | 0,335 |  |  |  |  | 0,448 | 0,116 | 0,346 | -66,4740 |
| ID: 0960 | 795 | 0,87283583 | 1,130 | 0,30918 | 2,037 | 0,31968801 | 0,555 |  |  |  |  | 0,495 | 0,243 | 0,438 | -44,5205 |
| ID: 0961 | 796 | 0,86093109 | 1,012 | 0,30957 | 0,883 | 0,23133039 | 1,146 |  |  |  |  | 0,947 | 1,073 | 0,936 | 14,6368  |
| ID: 0962 | 797 | 0,85774094 | 0,984 | 0,82347 | 1,018 | 0,70121081 | 0,966 |  |  |  |  | 1,018 | 1,000 | 1,035 | -3,3816  |
| ID: 0964 | 798 | 0,33612281 | 0,913 | 0,25161 | 0,798 | 0,39046707 | 1,145 |  |  |  |  | 0,939 | 1,177 | 1,028 | 14,4942  |

|          |     |            |       |         |       |            |       |                                                                                   |  |  |                                               |       |       |       |          |
|----------|-----|------------|-------|---------|-------|------------|-------|-----------------------------------------------------------------------------------|--|--|-----------------------------------------------|-------|-------|-------|----------|
| ID: 0965 | 799 | 0,04529776 | 1,049 | 0,1772  | 0,973 | 0,01744499 | 1,078 |                                                                                   |  |  |                                               | 1,085 | 1,115 | 1,034 | 7,8337   |
| ID: 0966 | 800 | 0,91333912 | 0,892 | 0,27436 | 0,373 | 0,29942547 | 2,391 |                                                                                   |  |  |                                               | 0,726 | 1,946 | 0,814 | 139,0663 |
| ID: 0967 | 801 | 0,2783516  | 0,903 | 0,34382 | 0,781 | 0,59068734 | 1,156 |                                                                                   |  |  |                                               | 0,978 | 1,252 | 1,083 | 15,6048  |
| ID: 0968 | 802 | 0,55441279 | 0,982 | 0,05969 | 0,922 | 0,00781804 | 1,064 |                                                                                   |  |  |                                               | 1,066 | 1,156 | 1,086 | 6,4457   |
| ID: 0969 | 803 | 0,22680805 | 1,300 | 0,31755 | 1,260 | 0,93448706 | 1,032 |                                                                                   |  |  |                                               | 0,857 | 0,68  | 0,659 | 3,1866   |
| ID: 0971 | 804 | 0,53209347 | 1,035 | 0,70686 | 0,852 | 0,55148452 | 1,215 |                                                                                   |  |  |                                               | 1,045 | 1,227 | 1,010 | 21,4851  |
| ID: 0972 | 805 | 0,00180227 | 0,795 | 0,00062 | 0,682 | 0,04864136 | 1,166 |                                                                                   |  |  |                                               | 0,892 | 1,308 | 1,122 | 16,5775  |
| ID: 0973 | 806 | 0,15915534 | 0,859 | 0,44733 | 0,914 | 0,59719246 | 0,939 |                                                                                   |  |  |                                               | 0,929 | 1,016 | 1,082 | -6,0998  |
| ID: 0974 | 807 | 0,25939114 | 0,880 | 0,30224 | 0,862 | 0,90982339 | 1,020 |                                                                                   |  |  |                                               | 1,046 | 1,213 | 1,189 | 2,0185   |
| ID: 0975 | 808 | 0,4650766  | 1,095 | 0,67629 | 1,061 | 0,95955842 | 1,032 |                                                                                   |  |  |                                               | 1,203 | 1,134 | 1,099 | 3,1847   |
| ID: 0976 | 809 | 0,80659389 | 1,047 | 0,88608 | 0,992 | 0,58024171 | 1,056 |                                                                                   |  |  |                                               | 0,997 | 1,005 | 0,952 | 5,5672   |
| ID: 0977 | 810 | 0,48382309 | 0,965 | 0,52876 | 0,963 | 0,98200749 | 1,002 |                                                                                   |  |  |                                               | 1,044 | 1,084 | 1,082 | 0,1848   |
| ID: 0978 | 811 | 0,46907404 | 1,122 | 0,16132 | 1,327 | 0,66756027 | 0,845 |                                                                                   |  |  |                                               | 0,876 | 0,66  | 0,781 | -15,4930 |
| ID: 0979 | 812 | 0,51893291 | 0,972 | 0,20797 | 0,946 | 0,54371001 | 1,028 |                                                                                   |  |  |                                               | 1,010 | 1,068 | 1,039 | 2,7911   |
| ID: 0980 | 813 | 0,06477291 | 0,691 | 0,14929 | 0,723 | 0,66966453 | 0,956 |                                                                                   |  |  |                                               | 0,892 | 1,234 | 1,291 | -4,4152  |
| ID: 0981 | 814 | 0,95841451 | 0,908 | 0,26393 | 0,412 | 0,28346876 | 2,202 |                                                                                   |  |  |                                               | 0,719 | 1,744 | 0,792 | 120,2020 |
| ID: 0983 | 815 | 0,0909983  | 0,785 | 0,12923 | 0,701 | 0,54484725 | 1,120 |                                                                                   |  |  |                                               | 0,871 | 1,243 | 1,110 | 11,9820  |
| ID: 0985 | 816 | 0,18431801 | 1,438 | 0,16066 | 1,653 | 0,604183   | 0,870 |                                                                                   |  |  |                                               | 1,296 | 0,784 | 0,901 | -12,9856 |
| ID: 0986 | 817 | 0,18579024 | 1,324 | 0,12228 | 1,460 | 0,76587165 | 0,906 |                                                                                   |  |  |                                               | 1,288 | 0,882 | 0,973 | -9,3525  |
| ID: 0987 | 818 | 0,97261761 | 0,953 | 0,42127 | 0,495 | 0,40228045 | 1,926 |                                                                                   |  |  |                                               | 0,806 | 1,629 | 0,846 | 92,5532  |
| ID: 0988 | 819 | 0,54725134 | 1,086 | 0,15362 | 1,178 | 0,76054452 | 0,923 |                                                                                   |  |  |                                               | 0,955 | 0,811 | 0,879 | -7,7361  |
| ID: 0989 | 820 | 0,31679691 | 1,150 | 0,19676 | 1,189 | 0,85268944 | 0,967 |                                                                                   |  |  |                                               | 1,014 | 0,853 | 0,882 | -3,2880  |
| ID: 0990 | 821 | 0,13770107 | 0,794 | 0,17215 | 0,750 | 0,82259931 | 1,058 |                                                                                   |  |  |                                               | 0,832 | 1,109 | 1,048 | 5,8206   |
| ID: 0991 | 822 | 0,99462451 | 0,988 | 0,30686 | 0,909 | 0,45701397 | 1,087 |                                                                                   |  |  |                                               | 0,896 | 0,986 | 0,907 | 8,7100   |
| ID: 0992 | 823 | 0,57793524 | 0,945 | 0,79513 | 0,973 | 0,79420058 | 0,972 |                                                                                   |  |  |                                               | 1,003 | 1,031 | 1,061 | -2,8275  |
| ID: 0993 | 824 | 0,40514389 | 0,436 | 0,13925 | 0,381 | 0,6336236  | 1,144 |                                                                                   |  |  |                                               | 0,541 | 1,420 | 1,241 | 14,4239  |
| ID: 0994 | 825 | 0,63281796 | 0,904 | 0,39134 | 1,143 | 0,26198095 | 0,791 |                                                                                   |  |  |                                               | 0,909 | 0,795 | 1,005 | -20,8955 |
| ID: 0995 | 826 | 0,99615546 | 1,001 | 0,95109 | 0,996 | 0,94161376 | 1,005 |                                                                                   |  |  |                                               | 1,036 | 1,040 | 1,035 | 0,4831   |
| ID: 0996 | 827 | 0,19279986 | 1,251 | 0,08465 | 1,278 | 0,96321202 | 0,979 |                                                                                   |  |  |                                               | 0,887 | 0,694 | 0,709 | -2,1157  |
| ID: 0997 | 828 | 0,16247384 | 0,686 | 0,20404 | 0,668 | 0,9570215  | 1,027 |                                                                                   |  |  |                                               | 0,774 | 1,159 | 1,129 | 2,6572   |
| ID: 0998 | 829 | 0,26989274 | 1,032 | 0,4844  | 0,981 | 0,10316004 | 1,052 |                                                                                   |  |  |                                               | 1,110 | 1,132 | 1,076 | 5,2045   |
| ID: 0999 | 830 | 0,59956464 | 0,979 | 0,89197 | 1,006 | 0,47252354 | 0,973 |                                                                                   |  |  |                                               | 1,047 | 1,041 | 1,070 | -2,7103  |
| ID: 1000 | 831 | 0,72213706 | 0,982 | 0,89372 | 0,995 | 0,80329473 | 0,987 |                                                                                   |  |  |                                               | 0,958 | 0,963 | 0,976 | -1,3320  |
| ID: 1001 | 832 | 0,317276   | 0,830 | 0,2844  | 0,872 | 0,85318801 | 0,952 |                                                                                   |  |  |                                               | 0,865 | 0,992 | 1,042 | -4,7985  |
| ID: 1002 | 833 | 0,3320138  | 0,944 | 0,07856 | 0,901 | 0,28921615 | 1,048 |                                                                                   |  |  |                                               | 0,89  | 0,988 | 0,943 | 4,7720   |
| ID: 1004 | 834 | 0,66232731 | 1,028 | 0,88389 | 1,004 | 0,89084338 | 1,024 |                                                                                   |  |  |                                               | 1,021 | 1,017 | 0,993 | 2,4169   |
|          |     |            |       |         |       |            |       | Agrotis_qualite_rep_c1149 <br>ORF2 length 393 aa, 1182 bp, 17<br>from 77..1258 of |  |  | unknown / non identified<br>by blast research | 1,126 | 0,826 | 1,152 | -28,2986 |

|          |     |            |       |         |       |            |       |                                                                              |   |  |  |  |       |       |       |          |
|----------|-----|------------|-------|---------|-------|------------|-------|------------------------------------------------------------------------------|---|--|--|--|-------|-------|-------|----------|
| ID: 1005 | 835 | 0,79309447 | 0,977 | 0,0068  | 1,363 | 0,00333438 | 0,717 | Agrotis_qualite_c18204 ORF<br>14 length 148 aa, 447 bp,<br>from 705..1151 of | 3 |  |  |  | 1,126 | 0,826 | 1,152 | -28,2986 |
|          |     |            |       |         |       |            |       | Agrotis_qualite_rep_c18905 <br>ORF5 length 93 aa, 282 bp,<br>from 50..331 of | 2 |  |  |  | 1,126 | 0,826 | 1,152 | -28,2986 |
| ID: 1006 | 836 | 0,9843355  | 1,016 | 0,92392 | 1,034 | 0,85903044 | 0,983 |                                                                              |   |  |  |  | 0,894 | 0,865 | 0,88  | -1,7045  |
| ID: 1007 | 837 | 0,67721487 | 1,033 | 0,51317 | 1,072 | 0,9676448  | 0,964 |                                                                              |   |  |  |  | 1,112 | 1,037 | 1,076 | -3,6245  |
| ID: 1008 | 838 | 0,94180876 | 1,002 | 0,56415 | 1,015 | 0,7293521  | 0,987 |                                                                              |   |  |  |  | 1,051 | 1,035 | 1,049 | -1,3346  |
| ID: 1009 | 839 | 0,21335854 | 1,040 | 0,77141 | 0,993 | 0,03829744 | 1,047 |                                                                              |   |  |  |  | 1,039 | 1,046 | 0,999 | 4,7047   |
| ID: 1010 | 840 | 0,18987507 | 1,116 | 0,02677 | 1,257 | 0,04531155 | 0,888 |                                                                              |   |  |  |  | 1,144 | 0,91  | 1,025 | -11,2195 |
| ID: 1011 | 841 | 0,17267075 | 0,416 | 0,15077 | 0,371 | 0,83129775 | 1,122 |                                                                              |   |  |  |  | 0,445 | 1,199 | 1,069 | 12,1609  |
| ID: 1012 | 842 | 0,59737943 | 0,983 | 0,5976  | 0,982 | 0,95995102 | 1,001 |                                                                              |   |  |  |  | 1,113 | 1,133 | 1,132 | 0,0883   |
| ID: 1013 | 843 | 0,75288992 | 1,020 | 0,94022 | 0,993 | 0,81224449 | 1,027 |                                                                              |   |  |  |  | 1,066 | 1,073 | 1,045 | 2,6794   |
| ID: 1014 | 844 | 0,01494495 | 1,345 | 0,00094 | 1,635 | 0,05202464 | 0,823 |                                                                              |   |  |  |  | 1,419 | 0,868 | 1,055 | -17,7251 |
| ID: 1015 | 845 | 0,84752277 | 0,957 | 0,42608 | 0,943 | 0,79744169 | 1,014 |                                                                              |   |  |  |  | 0,881 | 0,934 | 0,921 | 1,4115   |
| ID: 1016 | 846 | 0,58922491 | 1,063 | 0,22206 | 1,152 | 0,70607393 | 0,923 |                                                                              |   |  |  |  | 1,116 | 0,969 | 1,050 | -7,7143  |
| ID: 1017 | 847 | 0,55092465 | 0,946 | 0,6556  | 1,068 | 0,08519896 | 0,886 |                                                                              |   |  |  |  | 1,198 | 1,122 | 1,266 | -11,3744 |
| ID: 1018 | 848 | 0,21424423 | 1,079 | 0,78645 | 1,015 | 0,40060183 | 1,063 |                                                                              |   |  |  |  | 0,942 | 0,928 | 0,873 | 6,3001   |
| ID: 1019 | 849 | 0,20645843 | 1,066 | 0,14007 | 1,065 | 0,94610361 | 1,001 |                                                                              |   |  |  |  | 1,141 | 1,071 | 1,070 | 0,0935   |
| ID: 1020 | 850 | 0,65916996 | 0,984 | 0,54829 | 0,914 | 0,59348593 | 1,077 |                                                                              |   |  |  |  | 1,038 | 1,136 | 1,055 | 7,6777   |
| ID: 1021 | 851 | 0,30151692 | 0,757 | 0,25865 | 0,750 | 0,95136369 | 1,009 |                                                                              |   |  |  |  | 0,931 | 1,241 | 1,230 | 0,8943   |
| ID: 1023 | 852 | 0,90403835 | 1,012 | 0,80393 | 1,022 | 0,61266405 | 0,990 |                                                                              |   |  |  |  | 1,010 | 0,988 | 0,998 | -1,0020  |
| ID: 1024 | 853 | 0,51200032 | 1,053 | 0,3986  | 1,071 | 0,85463557 | 0,983 |                                                                              |   |  |  |  | 1,065 | 0,994 | 1,011 | -1,6815  |
| ID: 1025 | 854 | 0,73773008 | 1,013 | 0,87704 | 1,007 | 0,91068846 | 1,007 |                                                                              |   |  |  |  | 1,075 | 1,068 | 1,061 | 0,6598   |
| ID: 1026 | 855 | 0,48065728 | 0,957 | 0,55225 | 0,963 | 0,92635808 | 0,994 |                                                                              |   |  |  |  | 1,067 | 1,108 | 1,115 | -0,6278  |
| ID: 1027 | 856 | 0,89823726 | 1,008 | 0,84364 | 1,012 | 0,95103448 | 0,996 |                                                                              |   |  |  |  | 1,050 | 1,038 | 1,042 | -0,3839  |
| ID: 1029 | 857 | 0,03108317 | 1,200 | 0,00964 | 1,262 | 0,55142641 | 0,951 |                                                                              |   |  |  |  | 1,121 | 0,888 | 0,934 | -4,9251  |
| ID: 1030 | 858 | 0,90713719 | 0,997 | 0,97832 | 0,999 | 0,93233002 | 0,998 |                                                                              |   |  |  |  | 1,082 | 1,083 | 1,085 | -0,1843  |
| ID: 1031 | 859 | 0,24812672 | 1,071 | 0,089   | 1,127 | 0,1950646  | 0,950 |                                                                              |   |  |  |  | 1,295 | 1,149 | 1,209 | -4,9628  |
| ID: 1032 | 860 | 0,15402589 | 1,178 | 0,51456 | 0,930 | 0,03142124 | 1,266 |                                                                              |   |  |  |  | 0,915 | 0,984 | 0,777 | 26,6409  |
| ID: 1033 | 861 | 0,63944543 | 1,032 | 0,11969 | 1,115 | 0,22952766 | 0,925 |                                                                              |   |  |  |  | 1,241 | 1,113 | 1,203 | -7,4813  |
| ID: 1034 | 862 | 0,46659207 | 1,040 | 0,34907 | 1,064 | 0,61493072 | 0,977 |                                                                              |   |  |  |  | 1,392 | 1,308 | 1,339 | -2,3152  |
| ID: 1035 | 863 | 0,62579028 | 1,019 | 0,74881 | 0,987 | 0,45649185 | 1,032 |                                                                              |   |  |  |  | 1,082 | 1,096 | 1,062 | 3,2015   |
| ID: 1036 | 864 | 0,18257934 | 1,045 | 0,9629  | 1,002 | 0,27495347 | 1,043 |                                                                              |   |  |  |  | 1,260 | 1,258 | 1,206 | 4,3118   |
| ID: 1037 | 865 | 0,58201687 | 0,987 | 0,00609 | 0,929 | 0,03080048 | 1,063 |                                                                              |   |  |  |  | 1,010 | 1,087 | 1,023 | 6,2561   |
| ID: 1038 | 866 | 0,47322369 | 1,184 | 0,50615 | 0,705 | 0,22129736 | 1,678 |                                                                              |   |  |  |  | 1,044 | 1,480 | 0,882 | 67,8005  |
| ID: 1039 | 867 | 0,28228014 | 1,117 | 0,04829 | 1,275 | 0,3930153  | 0,876 |                                                                              |   |  |  |  | 1,090 | 0,855 | 0,976 | -12,3975 |
| ID: 1040 | 868 | 0,33138016 | 1,071 | 0,95849 | 0,998 | 0,52657777 | 1,073 |                                                                              |   |  |  |  | 1,087 | 1,089 | 1,015 | 7,2906   |
| ID: 1041 | 869 | 0,13131382 | 1,138 | 0,43045 | 1,090 | 0,71302645 | 1,045 |                                                                              |   |  |  |  | 1,201 | 1,102 | 1,055 | 4,4550   |

|          |     |            |       |          |       |            |       |  |  |  |  |       |       |       |          |
|----------|-----|------------|-------|----------|-------|------------|-------|--|--|--|--|-------|-------|-------|----------|
| ID: 1043 | 870 | 0,83269563 | 0,884 | 0,36165  | 0,510 | 0,42875927 | 1,731 |  |  |  |  | 0,766 | 1,501 | 0,867 | 73,1257  |
| ID: 1044 | 871 | 0,92687617 | 0,874 | 0,36002  | 0,483 | 0,41100083 | 1,810 |  |  |  |  | 0,758 | 1,569 | 0,867 | 80,9689  |
| ID: 1045 | 872 | 0,90281151 | 0,997 | 0,82219  | 0,976 | 0,8379053  | 1,022 |  |  |  |  | 0,961 | 0,985 | 0,964 | 2,1784   |
| ID: 1046 | 873 | 0,71131267 | 1,026 | 0,66265  | 1,030 | 0,98509423 | 0,996 |  |  |  |  | 1,112 | 1,080 | 1,084 | -0,3690  |
| ID: 1047 | 874 | 0,14847828 | 0,918 | 0,07497  | 0,731 | 0,14408863 | 1,256 |  |  |  |  | 1,016 | 1,390 | 1,107 | 25,5646  |
| ID: 1048 | 875 | 0,78992424 | 1,031 | 0,75664  | 0,944 | 0,58982372 | 1,093 |  |  |  |  | 1,259 | 1,334 | 1,221 | 9,2547   |
| ID: 1051 | 876 | 0,34407752 | 1,090 | 0,32032  | 1,091 | 0,9752365  | 0,999 |  |  |  |  | 1,082 | 0,992 | 0,993 | -0,1007  |
| ID: 1052 | 877 | 0,99638467 | 0,999 | 0,16174  | 0,908 | 0,14469251 | 1,100 |  |  |  |  | 1,099 | 1,210 | 1,100 | 10,0000  |
| ID: 1053 | 878 | 0,33608437 | 1,197 | 0,05051  | 1,473 | 0,26377608 | 0,813 |  |  |  |  | 1,360 | 0,923 | 1,136 | -18,7500 |
| ID: 1054 | 879 | 0,75145095 | 1,024 | 0,75945  | 1,024 | 0,9591817  | 1,000 |  |  |  |  | 1,219 | 1,190 | 1,190 | 0,0000   |
| ID: 1055 | 880 | 0,88734352 | 0,979 | 0,30514  | 1,172 | 0,25074365 | 0,836 |  |  |  |  | 1,138 | 0,971 | 1,162 | -16,4372 |
| ID: 1056 | 881 | 0,44755314 | 0,931 | 0,62806  | 0,856 | 0,86109647 | 1,088 |  |  |  |  | 0,923 | 1,078 | 0,991 | 8,7790   |
| ID: 1057 | 882 | 0,4877335  | 1,044 | 0,33602  | 1,100 | 0,55361152 | 0,949 |  |  |  |  | 1,481 | 1,346 | 1,418 | -5,0776  |
| ID: 1058 | 883 | 0,90228272 | 1,033 | 0,38703  | 0,581 | 0,29635565 | 1,780 |  |  |  |  | 0,928 | 1,598 | 0,898 | 77,9510  |
| ID: 1059 | 884 | 0,30822212 | 0,972 | 0,43787  | 0,973 | 0,95551815 | 0,999 |  |  |  |  | 1,112 | 1,143 | 1,144 | -0,0874  |
| ID: 1060 | 885 | 0,46512964 | 1,045 | 0,37827  | 0,954 | 0,09722735 | 1,095 |  |  |  |  | 1,055 | 1,106 | 1,010 | 9,5050   |
| ID: 1062 | 886 | 0,30574481 | 1,057 | 0,55     | 1,042 | 0,90577047 | 1,014 |  |  |  |  | 1,301 | 1,248 | 1,231 | 1,3810   |
| ID: 1063 | 887 | 0,1579141  | 0,845 | 0,91155  | 1,005 | 0,18718378 | 0,841 |  |  |  |  | 1,086 | 1,081 | 1,285 | -15,8755 |
| ID: 1064 | 888 | 0,57800985 | 1,106 | 0,88562  | 1,005 | 0,43269162 | 1,101 |  |  |  |  | 1,088 | 1,083 | 0,984 | 10,0610  |
| ID: 1065 | 889 | 0,40099337 | 1,052 | 0,49043  | 1,052 | 0,96980561 | 1,000 |  |  |  |  | 1,280 | 1,217 | 1,217 | 0,0000   |
| ID: 1066 | 890 | 0,64797037 | 1,161 | 0,85727  | 1,106 | 0,68314195 | 1,050 |  |  |  |  | 1,094 | 0,989 | 0,942 | 4,9894   |
| ID: 1067 | 891 | 0,4750631  | 0,970 | 0,9265   | 0,988 | 0,71553994 | 0,982 |  |  |  |  | 1,038 | 1,051 | 1,070 | -1,7757  |
| ID: 1068 | 892 | 0,26523646 | 0,876 | 0,23913  | 0,862 | 0,8780578  | 1,016 |  |  |  |  | 1,032 | 1,197 | 1,178 | 1,6129   |
| ID: 1069 | 893 | 0,4586891  | 1,066 | 0,37069  | 1,121 | 0,6827969  | 0,952 |  |  |  |  | 1,301 | 1,161 | 1,220 | -4,8361  |
| ID: 1070 | 894 | 0,1323019  | 1,144 | 0,18164  | 1,186 | 0,72805388 | 0,965 |  |  |  |  | 1,335 | 1,126 | 1,167 | -3,5133  |
| ID: 1071 | 895 | 0,64035674 | 0,855 | 0,0735   | 0,743 | 0,46342925 | 1,151 |  |  |  |  | 0,828 | 1,114 | 0,968 | 15,0826  |
| ID: 1072 | 896 | 0,42599435 | 1,046 | 0,5586   | 1,021 | 0,68760524 | 1,025 |  |  |  |  | 1,042 | 1,021 | 0,996 | 2,5100   |
| ID: 1073 | 897 | 0,26642415 | 1,139 | 0,40413  | 1,117 | 0,96257634 | 1,020 |  |  |  |  | 1,260 | 1,128 | 1,106 | 1,9892   |
| ID: 1074 | 898 | 5,62E-01   | 0,958 | 3,30E-02 | 0,690 | 3,17E-02   | 1,388 |  |  |  |  | 1,073 | 1,555 | 1,120 | 38,8393  |
| ID: 1076 | 899 | 0,69922885 | 0,975 | 0,13929  | 0,948 | 0,60004062 | 1,028 |  |  |  |  | 1,001 | 1,056 | 1,027 | 2,8238   |
| ID: 1077 | 900 | 0,52409259 | 1,029 | 0,25514  | 1,159 | 0,28043307 | 0,888 |  |  |  |  | 1,064 | 0,918 | 1,034 | -11,2186 |
| ID: 1079 | 901 | 0,99506537 | 0,992 | 0,38931  | 1,087 | 0,46314834 | 0,913 |  |  |  |  | 0,901 | 0,829 | 0,908 | -8,7004  |
| ID: 1080 | 902 | 0,18943813 | 1,168 | 0,51431  | 1,099 | 0,75213262 | 1,063 |  |  |  |  | 1,120 | 1,019 | 0,959 | 6,2565   |
| ID: 1081 | 903 | 0,74458506 | 1,005 | 0,39294  | 1,032 | 0,40108926 | 0,974 |  |  |  |  | 1,126 | 1,091 | 1,120 | -2,5893  |
| ID: 1082 | 904 | 0,12224867 | 1,134 | 0,06069  | 1,211 | 0,36703195 | 0,937 |  |  |  |  | 1,040 | 0,859 | 0,917 | -6,3250  |
| ID: 1085 | 905 | 0,079257   | 1,131 | 0,08857  | 1,131 | 0,99791446 | 1,000 |  |  |  |  | 1,279 | 1,131 | 1,131 | 0,0000   |
| ID: 1086 | 906 | 0,93108376 | 1,000 | 0,06556  | 0,909 | 0,20565508 | 1,100 |  |  |  |  | 1,039 | 1,143 | 1,039 | 10,0096  |
| ID: 1087 | 907 | 0,50280636 | 1,058 | 0,27006  | 1,112 | 0,37810126 | 0,951 |  |  |  |  | 1,099 | 0,988 | 1,039 | -4,9086  |
| ID: 1089 | 908 | 0,46891281 | 1,026 | 0,00324  | 1,171 | 0,00419038 | 0,877 |  |  |  |  | 1,166 | 0,996 | 1,136 | -12,3239 |
| ID: 1090 | 909 | 0,05340354 | 1,199 | 0,86297  | 1,005 | 0,20146098 | 1,192 |  |  |  |  | 0,947 | 0,942 | 0,79  | 19,2405  |

|          |     |            |       |         |       |            |       |  |  |  |  |       |       |       |          |
|----------|-----|------------|-------|---------|-------|------------|-------|--|--|--|--|-------|-------|-------|----------|
| ID: 1091 | 910 | 0,84221    | 0,979 | 0,51025 | 0,957 | 0,75828346 | 1,023 |  |  |  |  | 0,939 | 0,981 | 0,959 | 2,2941   |
| ID: 1092 | 911 | 0,68769139 | 0,986 | 0,46768 | 1,053 | 0,34609491 | 0,936 |  |  |  |  | 1,163 | 1,104 | 1,180 | -6,4407  |
| ID: 1093 | 912 | 0,55046028 | 1,023 | 0,94655 | 1,002 | 0,63270042 | 1,022 |  |  |  |  | 1,090 | 1,088 | 1,065 | 2,1596   |
| ID: 1094 | 913 | 0,26022344 | 1,186 | 0,42102 | 1,111 | 0,72358418 | 1,067 |  |  |  |  | 0,758 | 0,682 | 0,639 | 6,7293   |
| ID: 1095 | 914 | 0,98681763 | 0,989 | 0,11981 | 1,438 | 0,13086426 | 0,688 |  |  |  |  | 0,726 | 0,505 | 0,734 | -31,1989 |
| ID: 1096 | 915 | 0,8940858  | 0,997 | 0,96334 | 0,966 | 0,89152353 | 1,032 |  |  |  |  | 1,232 | 1,275 | 1,236 | 3,1553   |
| ID: 1097 | 916 | 0,62580195 | 1,028 | 0,0368  | 1,146 | 0,22937198 | 0,897 |  |  |  |  | 1,137 | 0,992 | 1,106 | -10,3074 |
| ID: 1098 | 917 | 0,34253426 | 1,096 | 0,67422 | 1,051 | 0,36265386 | 1,044 |  |  |  |  | 1,080 | 1,028 | 0,985 | 4,3655   |
| ID: 1100 | 918 | 0,82015022 | 0,988 | 0,8549  | 0,988 | 0,99236716 | 1,000 |  |  |  |  | 1,086 | 1,099 | 1,099 | 0,0000   |
| ID: 1101 | 919 | 0,65220074 | 1,111 | 0,43033 | 1,224 | 0,57252801 | 0,907 |  |  |  |  | 1,151 | 0,94  | 1,036 | -9,2664  |
| ID: 1102 | 920 | 0,21066494 | 1,162 | 0,19119 | 1,167 | 0,99905863 | 0,996 |  |  |  |  | 1,134 | 0,972 | 0,976 | -0,4098  |
| ID: 1103 | 921 | 0,49875124 | 1,110 | 0,05895 | 1,609 | 0,11767696 | 0,690 |  |  |  |  | 0,975 | 0,606 | 0,878 | -30,9795 |
| ID: 1104 | 922 | 0,54204431 | 1,134 | 0,05498 | 1,656 | 0,23952538 | 0,685 |  |  |  |  | 0,962 | 0,581 | 0,848 | -31,4858 |
| ID: 1105 | 923 | 0,5532177  | 1,070 | 0,92877 | 0,969 | 0,56368054 | 1,104 |  |  |  |  | 0,978 | 1,009 | 0,914 | 10,3939  |
| ID: 1106 | 924 | 0,63894966 | 1,095 | 0,22715 | 0,840 | 0,08188238 | 1,303 |  |  |  |  | 1,041 | 1,239 | 0,951 | 30,2839  |
| ID: 1108 | 925 | 0,81557055 | 1,010 | 0,43375 | 1,074 | 0,79153177 | 0,940 |  |  |  |  | 0,742 | 0,691 | 0,735 | -5,9864  |
| ID: 1109 | 926 | 0,97201047 | 1,003 | 0,5384  | 0,962 | 0,40650708 | 1,043 |  |  |  |  | 1,036 | 1,077 | 1,033 | 4,2594   |
| ID: 1110 | 927 | 0,99567558 | 0,984 | 0,14898 | 1,087 | 0,48673052 | 0,906 |  |  |  |  | 1,177 | 1,083 | 1,196 | -9,4482  |
| ID: 1111 | 928 | 0,26955666 | 1,119 | 0,08304 | 1,266 | 0,38643786 | 0,884 |  |  |  |  | 0,865 | 0,683 | 0,773 | -11,6429 |
| ID: 1112 | 929 | 0,63476132 | 1,046 | 0,30597 | 1,116 | 0,69536863 | 0,937 |  |  |  |  | 0,931 | 0,834 | 0,89  | -6,2921  |
| ID: 1114 | 930 | 0,99969249 | 0,958 | 0,74593 | 0,900 | 0,78469315 | 1,064 |  |  |  |  | 0,839 | 0,932 | 0,876 | 6,3927   |
| ID: 1115 | 931 | 0,95295391 | 0,913 | 0,7978  | 1,005 | 0,8114308  | 0,909 |  |  |  |  | 0,851 | 0,847 | 0,932 | -9,1202  |
| ID: 1116 | 932 | 0,4775379  | 1,096 | 0,08915 | 1,251 | 0,46753538 | 0,876 |  |  |  |  | 0,807 | 0,645 | 0,736 | -12,3641 |
| ID: 1117 | 933 | 0,19483173 | 1,373 | 0,04381 | 1,614 | 0,52040297 | 0,851 |  |  |  |  | 1,262 | 0,782 | 0,919 | -14,9075 |
| ID: 1118 | 934 | 0,18039636 | 1,205 | 0,01018 | 1,584 | 0,15853426 | 0,761 |  |  |  |  | 1,093 | 0,69  | 0,907 | -23,9250 |
| ID: 1119 | 935 | 0,36070163 | 1,047 | 0,68298 | 1,027 | 0,79319227 | 1,019 |  |  |  |  | 1,085 | 1,056 | 1,036 | 1,9305   |
| ID: 1120 | 936 | 0,65164049 | 1,016 | 0,43923 | 1,030 | 0,70240653 | 0,986 |  |  |  |  | 1,090 | 1,058 | 1,073 | -1,3979  |
| ID: 1121 | 937 | 0,48182858 | 0,852 | 0,41514 | 0,850 | 0,92744959 | 1,002 |  |  |  |  | 0,867 | 1,020 | 1,018 | 0,1965   |
| ID: 1122 | 938 | 0,5234098  | 1,058 | 0,0655  | 1,156 | 0,28198648 | 0,915 |  |  |  |  | 0,954 | 0,825 | 0,902 | -8,5366  |
| ID: 1123 | 939 | 0,75588576 | 1,025 | 0,46155 | 0,932 | 0,29252387 | 1,101 |  |  |  |  | 1,050 | 1,127 | 1,024 | 10,0586  |
| ID: 1124 | 940 | 0,61053305 | 1,069 | 0,10732 | 1,248 | 0,12624972 | 0,857 |  |  |  |  | 1,124 | 0,901 | 1,051 | -14,2721 |
| ID: 1125 | 941 | 0,54793852 | 0,961 | 0,59561 | 0,963 | 0,97351145 | 0,998 |  |  |  |  | 1,008 | 1,047 | 1,049 | -0,1907  |
| ID: 1126 | 942 | 0,7872159  | 1,026 | 0,33797 | 1,105 | 0,32865253 | 0,929 |  |  |  |  | 1,055 | 0,955 | 1,028 | -7,1012  |
| ID: 1127 | 943 | 0,05317008 | 0,877 | 0,5641  | 0,947 | 0,22628769 | 0,926 |  |  |  |  | 0,963 | 1,017 | 1,098 | -7,3770  |
| ID: 1128 | 944 | 0,39942293 | 0,773 | 0,04334 | 0,683 | 0,4068059  | 1,132 |  |  |  |  | 0,756 | 1,107 | 0,978 | 13,1902  |
| ID: 1129 | 945 | 0,08400883 | 1,223 | 0,20399 | 1,303 | 0,54272171 | 0,939 |  |  |  |  | 1,036 | 0,795 | 0,847 | -6,1393  |
| ID: 1130 | 946 | 0,1704668  | 1,165 | 0,39887 | 1,137 | 0,96468618 | 1,024 |  |  |  |  | 1,019 | 0,896 | 0,875 | 2,4000   |
| ID: 1131 | 947 | 0,01292752 | 1,854 | 0,05952 | 1,959 | 0,6602327  | 0,947 |  |  |  |  | 1,146 | 0,585 | 0,618 | -5,3398  |
| ID: 1133 | 948 | 0,2925879  | 1,036 | 0,61834 | 1,016 | 0,65621905 | 1,019 |  |  |  |  | 1,128 | 1,110 | 1,089 | 1,9284   |
| ID: 1134 | 949 | 0,0442848  | 1,213 | 0,82079 | 1,015 | 0,08366769 | 1,195 |  |  |  |  | 1,084 | 1,068 | 0,894 | 19,4631  |

|          |     |            |       |         |       |            |       |  |  |  |  |       |       |       |          |
|----------|-----|------------|-------|---------|-------|------------|-------|--|--|--|--|-------|-------|-------|----------|
| ID: 1135 | 950 | 0,43659544 | 1,059 | 0,0581  | 1,292 | 0,1258561  | 0,820 |  |  |  |  | 0,875 | 0,677 | 0,826 | -18,0387 |
| ID: 1136 | 951 | 0,72939791 | 1,026 | 0,94239 | 1,007 | 0,77779471 | 1,019 |  |  |  |  | 1,038 | 1,031 | 1,012 | 1,8775   |
| ID: 1137 | 952 | 0,93491616 | 0,974 | 0,05433 | 1,254 | 0,11214221 | 0,777 |  |  |  |  | 0,838 | 0,668 | 0,86  | -22,3256 |
| ID: 1138 | 953 | 0,79960141 | 0,974 | 0,93964 | 1,001 | 0,78434763 | 0,973 |  |  |  |  | 0,949 | 0,948 | 0,974 | -2,6694  |
| ID: 1139 | 954 | 0,95748337 | 1,007 | 0,82468 | 0,983 | 0,69461144 | 1,025 |  |  |  |  | 0,986 | 1,003 | 0,979 | 2,4515   |
| ID: 1141 | 955 | 0,51963549 | 1,095 | 0,35733 | 1,143 | 0,90405391 | 0,958 |  |  |  |  | 0,937 | 0,82  | 0,856 | -4,2056  |
| ID: 1142 | 956 | 0,71158443 | 1,022 | 0,04391 | 1,130 | 0,2347177  | 0,905 |  |  |  |  | 0,828 | 0,733 | 0,81  | -9,5062  |
| ID: 1143 | 957 | 0,82642636 | 0,987 | 0,68828 | 0,988 | 0,97453837 | 0,999 |  |  |  |  | 1,023 | 1,035 | 1,036 | -0,0965  |
| ID: 1144 | 958 | 0,86572788 | 1,028 | 0,17587 | 1,347 | 0,28362214 | 0,763 |  |  |  |  | 0,838 | 0,622 | 0,815 | -23,6810 |
| ID: 1145 | 959 | 0,66475304 | 1,051 | 0,78953 | 1,029 | 0,93173116 | 1,021 |  |  |  |  | 0,847 | 0,823 | 0,806 | 2,1092   |
| ID: 1146 | 960 | 0,14848133 | 0,862 | 0,24931 | 0,852 | 0,9681695  | 1,012 |  |  |  |  | 1,084 | 1,272 | 1,257 | 1,1933   |
| ID: 1147 | 961 | 0,32722256 | 0,855 | 0,04395 | 0,778 | 0,42510665 | 1,100 |  |  |  |  | 0,78  | 1,003 | 0,912 | 9,9781   |
| ID: 1148 | 962 | 0,21905008 | 0,929 | 0,13595 | 0,907 | 0,6193003  | 1,025 |  |  |  |  | 0,908 | 1,001 | 0,977 | 2,4565   |
| ID: 1149 | 963 | 0,92900652 | 0,981 | 0,5541  | 0,952 | 0,6965946  | 1,030 |  |  |  |  | 0,916 | 0,962 | 0,934 | 2,9979   |
| ID: 1150 | 964 | 0,96862891 | 0,977 | 0,38316 | 1,215 | 0,47112678 | 0,804 |  |  |  |  | 0,728 | 0,599 | 0,745 | -19,5973 |
| ID: 1151 | 965 | 0,74837434 | 0,979 | 0,68175 | 0,959 | 0,83645278 | 1,021 |  |  |  |  | 1,177 | 1,227 | 1,202 | 2,0799   |
| ID: 1152 | 966 | 0,58615623 | 0,964 | 0,99424 | 0,987 | 0,73690809 | 0,977 |  |  |  |  | 0,889 | 0,901 | 0,922 | -2,2777  |
| ID: 1153 | 967 | 0,48076542 | 1,061 | 0,34038 | 1,075 | 0,88496128 | 0,987 |  |  |  |  | 1,204 | 1,120 | 1,135 | -1,3216  |
| ID: 1154 | 968 | 0,75864465 | 1,014 | 0,91653 | 0,990 | 0,70375434 | 1,024 |  |  |  |  | 1,001 | 1,011 | 0,987 | 2,4316   |
| ID: 1155 | 969 | 0,65848619 | 1,033 | 0,96584 | 0,997 | 0,72343556 | 1,036 |  |  |  |  | 1,067 | 1,070 | 1,033 | 3,5818   |
| ID: 1156 | 970 | 0,77003741 | 1,015 | 0,42703 | 1,044 | 0,57930562 | 0,972 |  |  |  |  | 0,923 | 0,884 | 0,909 | -2,7503  |
| ID: 1158 | 971 | 0,51426528 | 0,944 | 0,32164 | 0,875 | 0,56667141 | 1,079 |  |  |  |  | 1,004 | 1,148 | 1,064 | 7,8947   |
| ID: 1160 | 972 | 0,91832589 | 0,992 | 0,6227  | 0,945 | 0,66475976 | 1,050 |  |  |  |  | 0,835 | 0,884 | 0,842 | 4,9881   |
| ID: 1162 | 973 | 0,76824974 | 1,012 | 0,5301  | 0,876 | 0,47978662 | 1,155 |  |  |  |  | 1,098 | 1,253 | 1,085 | 15,4839  |
| ID: 1163 | 974 | 0,01849072 | 0,926 | 0,98188 | 0,992 | 0,27278633 | 0,934 |  |  |  |  | 1,089 | 1,098 | 1,176 | -6,6327  |
| ID: 1164 | 975 | 0,42003258 | 1,018 | 0,14987 | 1,068 | 0,27587365 | 0,954 |  |  |  |  | 1,170 | 1,096 | 1,149 | -4,6127  |
| ID: 1165 | 976 | 0,4327665  | 1,058 | 0,04142 | 1,135 | 0,37703162 | 0,932 |  |  |  |  | 0,95  | 0,837 | 0,898 | -6,7929  |
| ID: 1166 | 977 | 0,66684508 | 0,976 | 0,57681 | 0,962 | 0,80724937 | 1,015 |  |  |  |  | 0,929 | 0,966 | 0,952 | 1,4706   |
| ID: 1167 | 978 | 0,34351449 | 1,151 | 0,11577 | 1,291 | 0,67608056 | 0,891 |  |  |  |  | 0,932 | 0,722 | 0,81  | -10,8642 |
| ID: 1168 | 979 | 0,43153633 | 1,085 | 0,25988 | 1,126 | 0,74948123 | 0,963 |  |  |  |  | 0,949 | 0,843 | 0,875 | -3,6571  |
| ID: 1170 | 980 | 0,49082272 | 1,060 | 0,87534 | 1,019 | 0,54691466 | 1,040 |  |  |  |  | 0,973 | 0,955 | 0,918 | 4,0305   |
| ID: 1171 | 981 | 0,08959654 | 0,882 | 0,04945 | 0,883 | 0,96741062 | 0,999 |  |  |  |  | 0,93  | 1,053 | 1,054 | -0,0949  |
| ID: 1172 | 982 | 0,42474668 | 0,924 | 0,41022 | 0,896 | 0,82333933 | 1,032 |  |  |  |  | 1,322 | 1,476 | 1,430 | 3,2168   |
| ID: 1173 | 983 | 0,28292923 | 0,851 | 0,61112 | 0,933 | 0,5117328  | 0,913 |  |  |  |  | 0,983 | 1,054 | 1,155 | -8,7446  |
| ID: 1175 | 984 | 0,70870912 | 0,955 | 0,32905 | 1,155 | 0,9968445  | 0,826 |  |  |  |  | 0,632 | 0,547 | 0,662 | -17,3716 |
| ID: 1176 | 985 | 0,37974179 | 0,901 | 0,23234 | 1,227 | 0,04795095 | 0,734 |  |  |  |  | 0,963 | 0,785 | 1,069 | -26,5669 |
| ID: 1177 | 986 | 0,49878881 | 0,922 | 0,49949 | 0,889 | 0,85481795 | 1,037 |  |  |  |  | 0,918 | 1,033 | 0,996 | 3,7149   |
| ID: 1178 | 987 | 0,37336503 | 1,110 | 0,76909 | 0,965 | 0,31751477 | 1,151 |  |  |  |  | 0,955 | 0,99  | 0,86  | 15,1163  |
| ID: 1179 | 988 | 0,38018414 | 1,096 | 0,01839 | 1,276 | 0,2278742  | 0,859 |  |  |  |  | 0,99  | 0,776 | 0,903 | -14,0642 |
| ID: 1180 | 989 | 0,11956994 | 1,123 | 0,03311 | 1,218 | 0,28609986 | 0,922 |  |  |  |  | 0,96  | 0,788 | 0,855 | -7,8363  |

|          |      |            |       |         |       |            |       |                                                                                 |    |                |                                                                         |       |       |       |          |
|----------|------|------------|-------|---------|-------|------------|-------|---------------------------------------------------------------------------------|----|----------------|-------------------------------------------------------------------------|-------|-------|-------|----------|
| ID: 1181 | 990  | 0,6427691  | 1,027 | 0,92206 | 1,008 | 0,62782631 | 1,019 |                                                                                 |    |                |                                                                         | 1,055 | 1,047 | 1,027 | 1,9474   |
| ID: 1182 | 991  | 0,99687379 | 1,000 | 0,43585 | 1,035 | 0,43395386 | 0,966 |                                                                                 |    |                |                                                                         | 1,148 | 1,109 | 1,148 | -3,3972  |
| ID: 1183 | 992  | 0,14676576 | 1,078 | 0,63429 | 1,029 | 0,25611684 | 1,047 |                                                                                 |    |                |                                                                         | 0,944 | 0,917 | 0,876 | 4,6804   |
| ID: 1184 | 993  | 0,91466454 | 1,006 | 0,97718 | 1,000 | 0,83739399 | 1,006 |                                                                                 |    |                |                                                                         | 1,016 | 1,016 | 1,010 | 0,5941   |
| ID: 1185 | 994  | 0,59943542 | 1,153 | 0,30354 | 1,301 | 0,21135281 | 0,886 |                                                                                 |    |                |                                                                         | 0,967 | 0,743 | 0,839 | -11,4422 |
| ID: 1186 | 995  | 0,56689321 | 1,074 | 0,22502 | 1,169 | 0,24773931 | 0,918 |                                                                                 |    |                |                                                                         | 0,815 | 0,697 | 0,759 | -8,1686  |
| ID: 1187 | 996  | 0,93934745 | 0,991 | 0,90393 | 1,008 | 0,85006148 | 0,983 |                                                                                 |    |                |                                                                         | 0,877 | 0,87  | 0,885 | -1,6949  |
| ID: 1188 | 997  | 0,61212252 | 1,035 | 0,01195 | 1,384 | 0,01313993 | 0,748 |                                                                                 |    |                |                                                                         | 0,905 | 0,654 | 0,874 | -25,1716 |
| ID: 1190 | 998  | 0,33045439 | 0,966 | 0,61497 | 0,974 | 0,81760799 | 0,992 |                                                                                 |    |                |                                                                         | 1,085 | 1,114 | 1,123 | -0,8014  |
| ID: 1192 | 999  | 0,63986111 | 1,047 | 0,14491 | 0,882 | 0,16669206 | 1,187 |                                                                                 |    |                |                                                                         | 0,825 | 0,935 | 0,788 | 18,6548  |
| ID: 1193 | 1000 | 0,6157427  | 1,072 | 0,44626 | 0,917 | 0,17671348 | 1,169 |                                                                                 |    |                |                                                                         | 0,956 | 1,043 | 0,892 | 16,9283  |
| ID: 1194 | 1001 | 0,83193252 | 1,008 | 0,12584 | 0,906 | 0,12066244 | 1,113 |                                                                                 |    |                |                                                                         | 1,029 | 1,136 | 1,021 | 11,2635  |
| ID: 1195 | 1002 | 0,47137818 | 1,063 | 0,64038 | 0,945 | 0,28743564 | 1,125 |                                                                                 |    |                |                                                                         | 1,142 | 1,208 | 1,074 | 12,4767  |
| ID: 1196 | 1003 | 0,99077493 | 1,001 | 0,75653 | 0,984 | 0,69434264 | 1,017 |                                                                                 |    |                |                                                                         | 1,078 | 1,095 | 1,077 | 1,6713   |
| ID: 1197 | 1004 | 0,41485744 | 1,128 | 0,08138 | 1,369 | 0,31920258 | 0,824 |                                                                                 |    |                |                                                                         | 1,098 | 0,802 | 0,973 | -17,5745 |
| ID: 1198 | 1005 | 0,48327313 | 0,961 | 0,80206 | 1,015 | 0,38684186 | 0,947 |                                                                                 |    |                |                                                                         | 1,010 | 0,995 | 1,051 | -5,3283  |
| ID: 1200 | 1006 | 0,95063095 | 0,996 | 0,17278 | 1,214 | 0,26272418 | 0,820 |                                                                                 |    |                |                                                                         | 0,708 | 0,583 | 0,711 | -18,0028 |
| ID: 1202 | 1007 | 0,3179731  | 1,090 | 0,15978 | 1,133 | 0,55221801 | 0,962 |                                                                                 |    |                |                                                                         | 1,184 | 1,045 | 1,086 | -3,7753  |
| ID: 1205 | 1008 | 0,61997148 | 1,054 | 0,01762 | 1,432 | 0,251243   | 0,736 |                                                                                 |    |                |                                                                         | 1,060 | 0,74  | 1,006 | -26,4414 |
| ID: 1207 | 1009 | 0,10984803 | 0,875 | 0,73416 | 0,937 | 0,49375252 | 0,934 |                                                                                 |    |                |                                                                         | 0,715 | 0,763 | 0,817 | -6,6095  |
| ID: 1208 | 1010 | 0,26396138 | 0,882 | 0,1157  | 0,764 | 0,12457603 | 1,155 |                                                                                 |    |                |                                                                         | 0,892 | 1,168 | 1,011 | 15,5292  |
| ID: 1209 | 1011 | 0,64964427 | 1,026 | 0,91617 | 0,996 | 0,48527556 | 1,030 |                                                                                 |    |                |                                                                         | 1,040 | 1,044 | 1,014 | 2,9586   |
| ID: 1210 | 1012 | 0,08360867 | 1,104 | 0,07016 | 1,123 | 0,49499936 | 0,984 |                                                                                 |    |                |                                                                         | 0,943 | 0,84  | 0,854 | -1,6393  |
| ID: 1211 | 1013 | 0,54178427 | 0,844 | 0,84232 | 0,917 | 0,74664895 | 0,920 |                                                                                 |    |                |                                                                         | 0,626 | 0,683 | 0,742 | -7,9515  |
| ID: 1212 | 1014 | 0,74754273 | 1,050 | 0,98901 | 1,010 | 0,60896417 | 1,040 |                                                                                 |    |                |                                                                         | 0,897 | 0,888 | 0,854 | 3,9813   |
| ID: 1213 | 1015 | 0,43984374 | 1,050 | 0,42144 | 1,053 | 0,96372861 | 0,997 |                                                                                 |    |                |                                                                         | 1,135 | 1,078 | 1,081 | -0,2775  |
| ID: 1214 | 1016 | 0,0307741  | 1,097 | 0,50165 | 0,947 | 0,04322935 | 1,158 |                                                                                 |    |                |                                                                         | 1,032 | 1,090 | 0,941 | 15,8342  |
| ID: 1215 | 1017 | 0,57270686 | 0,952 | 0,36319 | 0,953 | 0,94549309 | 0,999 |                                                                                 |    |                |                                                                         | 1,034 | 1,085 | 1,086 | -0,0921  |
| ID: 1218 | 1018 | 0,19596189 | 1,230 | 0,6001  | 1,105 | 0,41434197 | 1,113 |                                                                                 |    |                |                                                                         | 1,204 | 1,090 | 0,979 | 11,3381  |
| ID: 1219 | 1019 | 0,94641781 | 0,984 | 0,21178 | 1,288 | 0,23275302 | 0,764 |                                                                                 |    |                |                                                                         | 1,030 | 0,8   | 1,047 | -23,5912 |
| ID: 1220 | 1020 | 0,16765898 | 1,149 | 0,00202 | 1,468 | 0,01004528 | 0,783 | Agrotis_qualite_rep_c16812 <br>ORF3 length 323 aa, 972 bp,<br>from 102..1073 of | 15 | AGW9994<br>5.1 | geranylgeranyl<br>diphosphate synthase<br>[Choristoneura<br>fumiferana] | 1,026 | 0,699 | 0,893 | -21,7245 |
| ID: 1221 | 1021 | 0,52297629 | 0,931 | 0,89699 | 0,966 | 0,67135067 | 0,964 |                                                                                 |    |                |                                                                         | 0,717 | 0,742 | 0,77  | -3,6364  |
| ID: 1222 | 1022 | 0,86776127 | 0,985 | 0,9737  | 1,002 | 0,84424673 | 0,982 |                                                                                 |    |                |                                                                         | 0,895 | 0,893 | 0,909 | -1,7602  |
| ID: 1223 | 1023 | 0,60989291 | 1,035 | 0,2283  | 1,095 | 0,36405202 | 0,946 |                                                                                 |    |                |                                                                         | 0,972 | 0,888 | 0,939 | -5,4313  |
| ID: 1224 | 1024 | 0,4384096  | 1,106 | 0,29617 | 1,149 | 0,81071728 | 0,963 |                                                                                 |    |                |                                                                         | 1,003 | 0,873 | 0,907 | -3,7486  |
| ID: 1226 | 1025 | 0,15977552 | 1,045 | 0,25453 | 1,033 | 0,65689234 | 1,012 |                                                                                 |    |                |                                                                         | 1,129 | 1,093 | 1,080 | 1,2037   |
| ID: 1227 | 1026 | 0,56539648 | 0,983 | 0,01255 | 0,934 | 0,10203489 | 1,052 |                                                                                 |    |                |                                                                         | 1,039 | 1,112 | 1,057 | 5,2034   |
| ID: 1228 | 1027 | 0,35878659 | 1,179 | 0,00983 | 1,721 | 0,06390006 | 0,685 |                                                                                 |    |                |                                                                         | 1,217 | 0,707 | 1,032 | -31,4922 |



|          |      |            |       |         |       |            |       |  |  |  |  |       |       |       |          |
|----------|------|------------|-------|---------|-------|------------|-------|--|--|--|--|-------|-------|-------|----------|
| ID: 1229 | 1028 | 0,754764   | 0,986 | 0,11707 | 0,924 | 0,09848069 | 1,066 |  |  |  |  | 1,097 | 1,187 | 1,113 | 6,6487   |
| ID: 1230 | 1029 | 0,01388678 | 1,308 | 0,41042 | 1,087 | 0,04178418 | 1,203 |  |  |  |  | 1,101 | 1,013 | 0,842 | 20,3088  |
| ID: 1231 | 1030 | 0,2317652  | 1,401 | 0,06454 | 1,847 | 0,11745776 | 0,758 |  |  |  |  | 1,136 | 0,615 | 0,811 | -24,1677 |
| ID: 1232 | 1031 | 0,10792101 | 1,198 | 0,82245 | 1,016 | 0,33443346 | 1,179 |  |  |  |  | 0,902 | 0,888 | 0,753 | 17,9283  |
| ID: 1233 | 1032 | 0,86877577 | 0,976 | 0,76108 | 0,953 | 0,87135058 | 1,023 |  |  |  |  | 0,877 | 0,92  | 0,899 | 2,3359   |
| ID: 1234 | 1033 | 0,54022218 | 1,138 | 0,73615 | 0,969 | 0,24491459 | 1,175 |  |  |  |  | 0,831 | 0,858 | 0,73  | 17,5342  |
| ID: 1235 | 1034 | 0,91048199 | 0,942 | 0,67255 | 0,950 | 0,86936835 | 0,991 |  |  |  |  | 0,994 | 1,046 | 1,055 | -0,8531  |
| ID: 1236 | 1035 | 0,01798247 | 0,751 | 0,14828 | 1,205 | 0,00385357 | 0,623 |  |  |  |  | 0,869 | 0,721 | 1,157 | -37,6837 |
| ID: 1237 | 1036 | 0,07560037 | 1,088 | 0,00994 | 1,123 | 0,53634478 | 0,969 |  |  |  |  | 1,186 | 1,056 | 1,090 | -3,1193  |
| ID: 1238 | 1037 | 0,74322345 | 1,010 | 0,32403 | 1,036 | 0,43558508 | 0,975 |  |  |  |  | 1,128 | 1,089 | 1,117 | -2,5067  |
| ID: 1239 | 1038 | 0,83361974 | 1,019 | 0,03894 | 1,238 | 0,07755169 | 0,823 |  |  |  |  | 1,144 | 0,924 | 1,123 | -17,7204 |
| ID: 1241 | 1039 | 0,19248249 | 1,152 | 0,90613 | 0,961 | 0,30542628 | 1,199 |  |  |  |  | 1,159 | 1,206 | 1,006 | 19,8807  |
| ID: 1242 | 1040 | 0,32049633 | 0,959 | 0,02722 | 0,882 | 0,03389567 | 1,088 |  |  |  |  | 1,029 | 1,167 | 1,073 | 8,7605   |
| ID: 1244 | 1041 | 0,00209087 | 2,133 | 0,04527 | 1,554 | 0,02776456 | 1,373 |  |  |  |  | 1,557 | 1,002 | 0,73  | 37,2603  |
| ID: 1245 | 1042 | 0,37911506 | 1,166 | 0,97333 | 1,032 | 0,16294992 | 1,129 |  |  |  |  | 1,118 | 1,083 | 0,959 | 12,9301  |
| ID: 1246 | 1043 | 0,91270181 | 1,006 | 0,24457 | 0,903 | 0,19607399 | 1,115 |  |  |  |  | 0,935 | 1,036 | 0,929 | 11,5178  |
| ID: 1247 | 1044 | 0,17372865 | 1,336 | 0,06672 | 1,450 | 0,73014598 | 0,922 |  |  |  |  | 1,315 | 0,907 | 0,984 | -7,8252  |
| ID: 1248 | 1045 | 0,52540105 | 1,043 | 0,39738 | 0,958 | 0,07319445 | 1,088 |  |  |  |  | 0,945 | 0,986 | 0,906 | 8,8300   |
| ID: 1249 | 1046 | 0,97994064 | 0,998 | 0,45396 | 0,858 | 0,41666607 | 1,163 |  |  |  |  | 0,98  | 1,142 | 0,982 | 16,2933  |
| ID: 1250 | 1047 | 0,4514214  | 0,875 | 0,57434 | 1,157 | 0,20841101 | 0,756 |  |  |  |  | 0,75  | 0,648 | 0,857 | -24,3874 |
| ID: 1251 | 1048 | 0,17624084 | 0,930 | 0,49747 | 0,974 | 0,34496993 | 0,955 |  |  |  |  | 1,065 | 1,093 | 1,145 | -4,5415  |
| ID: 1252 | 1049 | 0,74209381 | 0,986 | 0,60136 | 0,976 | 0,81468362 | 1,010 |  |  |  |  | 1,078 | 1,104 | 1,093 | 1,0064   |
| ID: 1253 | 1050 | 0,65473248 | 1,022 | 0,06689 | 1,082 | 0,22454212 | 0,944 |  |  |  |  | 1,132 | 1,046 | 1,108 | -5,5957  |
| ID: 1254 | 1051 | 0,39290668 | 1,065 | 0,24498 | 0,901 | 0,07234495 | 1,182 |  |  |  |  | 1,063 | 1,180 | 0,998 | 18,2365  |
| ID: 1255 | 1052 | 0,78763587 | 0,938 | 0,97483 | 0,981 | 0,79319933 | 0,956 |  |  |  |  | 0,895 | 0,912 | 0,954 | -4,4025  |
| ID: 1257 | 1053 | 0,17831972 | 0,876 | 0,26922 | 0,824 | 0,70431322 | 1,064 |  |  |  |  | 0,896 | 1,088 | 1,023 | 6,3539   |
| ID: 1259 | 1054 | 0,48951941 | 1,057 | 0,17492 | 1,096 | 0,73374326 | 0,965 |  |  |  |  | 1,015 | 0,926 | 0,96  | -3,5417  |
| ID: 1260 | 1055 | 0,24856498 | 1,063 | 0,20341 | 1,060 | 0,9148729  | 1,003 |  |  |  |  | 1,031 | 0,973 | 0,97  | 0,3093   |
| ID: 1261 | 1056 | 0,0266331  | 1,133 | 0,95787 | 0,987 | 0,15577331 | 1,148 |  |  |  |  | 0,964 | 0,977 | 0,851 | 14,8061  |
| ID: 1262 | 1057 | 0,04433412 | 1,104 | 0,15467 | 1,065 | 0,14977818 | 1,036 |  |  |  |  | 1,060 | 0,995 | 0,96  | 3,6458   |
| ID: 1264 | 1058 | 0,73014189 | 1,064 | 0,54489 | 1,117 | 0,66713983 | 0,952 |  |  |  |  | 1,000 | 0,895 | 0,94  | -4,7872  |
| ID: 1265 | 1059 | 0,67278281 | 0,981 | 0,6999  | 0,985 | 0,93982239 | 0,996 |  |  |  |  | 1,138 | 1,155 | 1,160 | -0,4310  |
| ID: 1267 | 1060 | 0,28134697 | 0,840 | 0,03257 | 0,799 | 0,58774379 | 1,051 |  |  |  |  | 0,943 | 1,180 | 1,123 | 5,0757   |
| ID: 1268 | 1061 | 0,68985311 | 1,020 | 0,91809 | 1,003 | 0,88187742 | 1,017 |  |  |  |  | 1,024 | 1,021 | 1,004 | 1,6932   |
| ID: 1270 | 1062 | 0,97249601 | 1,004 | 0,93166 | 1,006 | 0,94846278 | 0,998 |  |  |  |  | 1,012 | 1,006 | 1,008 | -0,1984  |
| ID: 1271 | 1063 | 0,12671945 | 1,078 | 0,42039 | 1,040 | 0,19154543 | 1,036 |  |  |  |  | 1,187 | 1,141 | 1,101 | 3,6331   |
| ID: 1272 | 1064 | 0,33887086 | 0,914 | 0,54764 | 1,044 | 0,24249483 | 0,876 |  |  |  |  | 0,951 | 0,911 | 1,040 | -12,4038 |
| ID: 1273 | 1065 | 0,7778629  | 1,015 | 0,79397 | 1,017 | 0,85503772 | 0,998 |  |  |  |  | 1,088 | 1,070 | 1,072 | -0,1866  |
| ID: 1274 | 1066 | 0,83617446 | 1,009 | 0,17351 | 1,096 | 0,34891088 | 0,921 |  |  |  |  | 1,020 | 0,931 | 1,011 | -7,9130  |
| ID: 1275 | 1067 | 0,90826868 | 1,003 | 0,81454 | 1,010 | 0,89307813 | 0,993 |  |  |  |  | 0,997 | 0,987 | 0,994 | -0,7042  |

|          |      |            |       |         |       |            |       |  |  |  |  |       |       |       |          |
|----------|------|------------|-------|---------|-------|------------|-------|--|--|--|--|-------|-------|-------|----------|
| ID: 1276 | 1068 | 0,40699784 | 1,232 | 0,26936 | 1,393 | 0,93965235 | 0,885 |  |  |  |  | 1,025 | 0,736 | 0,832 | -11,5385 |
| ID: 1277 | 1069 | 0,55342067 | 0,893 | 0,88058 | 0,990 | 0,60275587 | 0,902 |  |  |  |  | 0,917 | 0,926 | 1,027 | -9,8345  |
| ID: 1278 | 1070 | 0,07411841 | 0,819 | 0,09579 | 0,867 | 0,56637223 | 0,944 |  |  |  |  | 0,851 | 0,981 | 1,039 | -5,5823  |
| ID: 1280 | 1071 | 0,87493361 | 1,005 | 0,30098 | 0,959 | 0,18602568 | 1,047 |  |  |  |  | 1,042 | 1,086 | 1,037 | 4,7252   |
| ID: 1281 | 1072 | 0,33956042 | 1,124 | 0,03221 | 1,318 | 0,26382703 | 0,853 |  |  |  |  | 0,68  | 0,516 | 0,605 | -14,7107 |
| ID: 1282 | 1073 | 0,38041624 | 1,086 | 0,37567 | 1,108 | 0,75378107 | 0,980 |  |  |  |  | 0,998 | 0,901 | 0,919 | -1,9587  |
| ID: 1283 | 1074 | 0,89184597 | 1,005 | 0,81302 | 0,971 | 0,75604214 | 1,035 |  |  |  |  | 1,069 | 1,101 | 1,064 | 3,4774   |
| ID: 1284 | 1075 | 0,93137933 | 0,949 | 0,66426 | 1,047 | 0,67016558 | 0,907 |  |  |  |  | 1,100 | 1,051 | 1,159 | -9,3184  |
| ID: 1285 | 1076 | 0,94138127 | 1,003 | 0,62265 | 0,941 | 0,55321898 | 1,066 |  |  |  |  | 0,969 | 1,030 | 0,966 | 6,6253   |
| ID: 1286 | 1077 | 0,49718278 | 0,976 | 0,09509 | 0,898 | 0,11581885 | 1,086 |  |  |  |  | 1,009 | 1,123 | 1,034 | 8,6074   |
| ID: 1287 | 1078 | 0,34817502 | 1,061 | 0,20207 | 0,910 | 0,01294592 | 1,166 |  |  |  |  | 1,008 | 1,108 | 0,95  | 16,6316  |
| ID: 1288 | 1079 | 0,87910823 | 0,993 | 0,66147 | 0,979 | 0,75070292 | 1,015 |  |  |  |  | 1,003 | 1,025 | 1,010 | 1,4851   |
| ID: 1289 | 1080 | 0,36754506 | 1,068 | 0,18685 | 1,144 | 0,33322056 | 0,934 |  |  |  |  | 1,267 | 1,108 | 1,186 | -6,5767  |
| ID: 1290 | 1081 | 0,72283193 | 1,053 | 0,72998 | 0,959 | 0,38530954 | 1,099 |  |  |  |  | 1,207 | 1,259 | 1,146 | 9,8604   |
| ID: 1291 | 1082 | 0,16882168 | 1,139 | 0,10786 | 1,247 | 0,48407168 | 0,914 |  |  |  |  | 0,925 | 0,742 | 0,812 | -8,6207  |
| ID: 1292 | 1083 | 0,30618181 | 1,088 | 0,368   | 1,071 | 0,7909616  | 1,016 |  |  |  |  | 0,953 | 0,89  | 0,876 | 1,5982   |
| ID: 1293 | 1084 | 0,64016766 | 1,017 | 0,86218 | 1,007 | 0,6278202  | 1,010 |  |  |  |  | 1,118 | 1,110 | 1,099 | 1,0009   |
| ID: 1296 | 1085 | 0,17609663 | 1,062 | 0,0699  | 1,124 | 0,25368128 | 0,945 |  |  |  |  | 1,245 | 1,108 | 1,172 | -5,4608  |
| ID: 1297 | 1086 | 0,75778624 | 0,989 | 0,89733 | 1,006 | 0,70917054 | 0,984 |  |  |  |  | 1,093 | 1,087 | 1,105 | -1,6290  |
| ID: 1298 | 1087 | 0,15223194 | 1,192 | 0,33845 | 1,118 | 0,64418441 | 1,067 |  |  |  |  | 1,016 | 0,909 | 0,852 | 6,6901   |
| ID: 1299 | 1088 | 0,92657908 | 1,007 | 0,64239 | 0,974 | 0,54284992 | 1,034 |  |  |  |  | 1,133 | 1,163 | 1,125 | 3,3778   |
| ID: 1300 | 1089 | 0,95436524 | 1,023 | 0,44423 | 0,905 | 0,21353272 | 1,130 |  |  |  |  | 1,171 | 1,294 | 1,145 | 13,0131  |
| ID: 1301 | 1090 | 0,95831574 | 0,993 | 0,52068 | 0,911 | 0,54819466 | 1,091 |  |  |  |  | 0,888 | 0,975 | 0,894 | 9,0604   |
| ID: 1302 | 1091 | 0,81522453 | 0,970 | 0,8627  | 0,982 | 0,94891223 | 0,988 |  |  |  |  | 0,873 | 0,889 | 0,9   | -1,2222  |
| ID: 1303 | 1092 | 0,15893079 | 1,040 | 0,02458 | 1,108 | 0,01963792 | 0,939 |  |  |  |  | 1,060 | 0,957 | 1,019 | -6,0844  |
| ID: 1304 | 1093 | 0,61165198 | 1,060 | 0,68919 | 0,961 | 0,40740727 | 1,102 |  |  |  |  | 1,068 | 1,111 | 1,008 | 10,2183  |
| ID: 1305 | 1094 | 0,44269474 | 1,083 | 0,72694 | 1,044 | 0,64595311 | 1,038 |  |  |  |  | 1,029 | 0,986 | 0,95  | 3,7895   |
| ID: 1306 | 1095 | 0,42721138 | 1,136 | 0,80235 | 0,981 | 0,18325661 | 1,158 |  |  |  |  | 1,173 | 1,196 | 1,033 | 15,7793  |
| ID: 1307 | 1096 | 0,08952064 | 1,271 | 0,47981 | 1,077 | 0,19075811 | 1,180 |  |  |  |  | 1,234 | 1,146 | 0,971 | 18,0227  |
| ID: 1308 | 1097 | 0,57335546 | 0,872 | 0,2576  | 0,761 | 0,56910723 | 1,145 |  |  |  |  | 0,884 | 1,161 | 1,014 | 14,4970  |
| ID: 1309 | 1098 | 0,87759309 | 0,983 | 0,30677 | 1,189 | 0,20997678 | 0,827 |  |  |  |  | 0,995 | 0,837 | 1,012 | -17,2925 |
| ID: 1312 | 1099 | 0,18317339 | 1,214 | 0,36054 | 1,173 | 0,9322747  | 1,035 |  |  |  |  | 1,184 | 1,009 | 0,975 | 3,4872   |
| ID: 1313 | 1100 | 0,80630832 | 0,987 | 0,80988 | 0,980 | 0,95319688 | 1,007 |  |  |  |  | 1,174 | 1,198 | 1,190 | 0,6723   |
| ID: 1317 | 1101 | 0,37178778 | 1,107 | 0,06642 | 1,402 | 0,09462008 | 0,790 |  |  |  |  | 1,082 | 0,772 | 0,977 | -20,9826 |
| ID: 1318 | 1102 | 0,30838923 | 1,335 | 0,31138 | 1,365 | 0,92304157 | 0,978 |  |  |  |  | 1,100 | 0,806 | 0,824 | -2,1845  |
| ID: 1319 | 1103 | 0,69823397 | 1,034 | 0,78525 | 0,977 | 0,50811773 | 1,058 |  |  |  |  | 1,035 | 1,059 | 1,001 | 5,7942   |
| ID: 1320 | 1104 | 0,65910454 | 1,019 | 0,51582 | 0,975 | 0,2725701  | 1,045 |  |  |  |  | 1,039 | 1,066 | 1,020 | 4,5098   |
| ID: 1321 | 1105 | 0,20726252 | 1,059 | 0,25561 | 1,046 | 0,81765763 | 1,012 |  |  |  |  | 1,135 | 1,085 | 1,072 | 1,2127   |
| ID: 1322 | 1106 | 0,24033954 | 1,235 | 0,4785  | 1,170 | 0,83950109 | 1,056 |  |  |  |  | 1,200 | 1,026 | 0,972 | 5,5556   |
| ID: 1323 | 1107 | 0,69679392 | 1,013 | 0,62117 | 0,978 | 0,32652937 | 1,035 |  |  |  |  | 1,089 | 1,113 | 1,075 | 3,5349   |

|          |      |            |       |         |       |            |       |  |  |  |  |       |       |       |          |
|----------|------|------------|-------|---------|-------|------------|-------|--|--|--|--|-------|-------|-------|----------|
| ID: 1324 | 1108 | 0,39974109 | 0,928 | 0,71374 | 0,953 | 0,7531782  | 0,973 |  |  |  |  | 1,064 | 1,116 | 1,147 | -2,7027  |
| ID: 1325 | 1109 | 0,4291832  | 0,974 | 0,46679 | 0,946 | 0,68313122 | 1,030 |  |  |  |  | 1,146 | 1,212 | 1,177 | 2,9737   |
| ID: 1326 | 1110 | 0,88254763 | 1,009 | 0,87633 | 1,009 | 0,982089   | 1,000 |  |  |  |  | 0,902 | 0,894 | 0,894 | 0,0000   |
| ID: 1327 | 1111 | 0,71262332 | 1,036 | 0,97277 | 0,994 | 0,69303542 | 1,041 |  |  |  |  | 0,901 | 0,906 | 0,87  | 4,1379   |
| ID: 1328 | 1112 | 0,22940283 | 0,939 | 0,17344 | 0,886 | 0,45736725 | 1,061 |  |  |  |  | 0,992 | 1,120 | 1,056 | 6,0606   |
| ID: 1329 | 1113 | 0,39842153 | 1,168 | 0,17936 | 1,388 | 0,60724608 | 0,841 |  |  |  |  | 0,515 | 0,371 | 0,441 | -15,8730 |
| ID: 1330 | 1114 | 0,61887024 | 1,019 | 0,8314  | 0,993 | 0,48061057 | 1,027 |  |  |  |  | 0,998 | 1,005 | 0,979 | 2,6558   |
| ID: 1331 | 1115 | 0,93516736 | 1,003 | 0,12186 | 1,190 | 0,20304503 | 0,843 |  |  |  |  | 1,008 | 0,847 | 1,005 | -15,7214 |
| ID: 1332 | 1116 | 0,52709263 | 1,095 | 0,93338 | 0,972 | 0,53815546 | 1,126 |  |  |  |  | 1,024 | 1,053 | 0,935 | 12,6203  |
| ID: 1333 | 1117 | 0,1656374  | 1,223 | 0,38423 | 1,143 | 0,2768937  | 1,070 |  |  |  |  | 1,531 | 1,340 | 1,252 | 7,0288   |
| ID: 1334 | 1118 | 0,54831159 | 0,897 | 0,59455 | 1,094 | 0,3319443  | 0,820 |  |  |  |  | 0,804 | 0,735 | 0,896 | -17,9688 |
| ID: 1335 | 1119 | 0,08284999 | 1,231 | 0,78834 | 1,040 | 0,02516798 | 1,184 |  |  |  |  | 0,942 | 0,906 | 0,765 | 18,4314  |
| ID: 1336 | 1120 | 0,54438799 | 1,042 | 0,58633 | 1,046 | 0,91853046 | 0,996 |  |  |  |  | 0,952 | 0,91  | 0,914 | -0,4376  |
| ID: 1337 | 1121 | 0,09970104 | 1,237 | 0,40897 | 1,116 | 0,34061494 | 1,109 |  |  |  |  | 1,023 | 0,917 | 0,827 | 10,8827  |
| ID: 1338 | 1122 | 0,13422652 | 1,105 | 0,56502 | 1,041 | 0,44997362 | 1,062 |  |  |  |  | 1,075 | 1,033 | 0,973 | 6,1665   |
| ID: 1339 | 1123 | 0,46458266 | 0,817 | 0,5602  | 0,904 | 0,78411524 | 0,904 |  |  |  |  | 0,759 | 0,84  | 0,929 | -9,5802  |
| ID: 1341 | 1124 | 0,110832   | 1,437 | 0,31865 | 1,296 | 0,27540133 | 1,109 |  |  |  |  | 1,078 | 0,832 | 0,75  | 10,9333  |
| ID: 1342 | 1125 | 0,51528417 | 1,129 | 0,1427  | 1,348 | 0,37350038 | 0,837 |  |  |  |  | 0,979 | 0,726 | 0,867 | -16,2630 |
| ID: 1343 | 1126 | 0,11029055 | 1,245 | 0,35015 | 1,150 | 0,64206774 | 1,082 |  |  |  |  | 1,241 | 1,079 | 0,997 | 8,2247   |
| ID: 1344 | 1127 | 0,31654645 | 1,100 | 0,35613 | 1,155 | 0,64195959 | 0,952 |  |  |  |  | 0,892 | 0,772 | 0,811 | -4,8089  |
| ID: 1345 | 1128 | 0,00585721 | 1,098 | 0,22006 | 0,951 | 0,00211783 | 1,154 |  |  |  |  | 1,069 | 1,124 | 0,974 | 15,4004  |
| ID: 1347 | 1129 | 0,08851375 | 1,180 | 0,0071  | 1,293 | 0,27547783 | 0,913 |  |  |  |  | 1,153 | 0,892 | 0,977 | -8,7001  |
| ID: 1349 | 1130 | 0,9717186  | 0,975 | 0,10774 | 0,792 | 0,18099347 | 1,232 |  |  |  |  | 0,82  | 1,036 | 0,841 | 23,1867  |
| ID: 1351 | 1131 | 0,22723628 | 1,083 | 0,83498 | 0,991 | 0,06634176 | 1,093 |  |  |  |  | 1,152 | 1,163 | 1,064 | 9,3045   |
| ID: 1352 | 1132 | 0,95519546 | 1,005 | 0,33534 | 0,923 | 0,21822001 | 1,089 |  |  |  |  | 1,098 | 1,190 | 1,093 | 8,8747   |
| ID: 1353 | 1133 | 0,16118307 | 1,102 | 0,19754 | 1,106 | 0,92005469 | 0,996 |  |  |  |  | 1,188 | 1,074 | 1,078 | -0,3711  |
| ID: 1354 | 1134 | 0,62926286 | 1,156 | 0,06168 | 2,237 | 0,23333619 | 0,517 |  |  |  |  | 0,311 | 0,139 | 0,269 | -48,3271 |
| ID: 1356 | 1135 | 0,06654661 | 1,439 | 0,22464 | 1,306 | 0,45154952 | 1,102 |  |  |  |  | 1,072 | 0,821 | 0,745 | 10,2013  |
| ID: 1357 | 1136 | 0,28069568 | 1,181 | 0,17321 | 1,253 | 0,42046325 | 0,943 |  |  |  |  | 1,135 | 0,906 | 0,961 | -5,7232  |
| ID: 1358 | 1137 | 0,93170263 | 1,001 | 0,48424 | 1,109 | 0,24951239 | 0,902 |  |  |  |  | 0,842 | 0,759 | 0,841 | -9,7503  |
| ID: 1362 | 1138 | 0,93770524 | 1,005 | 0,99475 | 1,002 | 0,93500549 | 1,003 |  |  |  |  | 1,097 | 1,095 | 1,092 | 0,2747   |
| ID: 1363 | 1139 | 0,37827713 | 1,079 | 0,95017 | 0,984 | 0,45540255 | 1,096 |  |  |  |  | 0,989 | 1,005 | 0,917 | 9,5965   |
| ID: 1364 | 1140 | 0,45858841 | 1,085 | 0,03916 | 1,271 | 0,25002265 | 0,854 |  |  |  |  | 0,737 | 0,58  | 0,679 | -14,5803 |
| ID: 1365 | 1141 | 0,99282898 | 0,995 | 0,26736 | 1,084 | 0,35627873 | 0,918 |  |  |  |  | 0,931 | 0,859 | 0,936 | -8,2265  |
| ID: 1367 | 1142 | 0,51536105 | 1,090 | 0,04187 | 1,385 | 0,34131309 | 0,787 |  |  |  |  | 0,838 | 0,605 | 0,769 | -21,3264 |
| ID: 1368 | 1143 | 0,98016011 | 0,993 | 0,36756 | 1,069 | 0,44951471 | 0,929 |  |  |  |  | 1,047 | 0,979 | 1,054 | -7,1157  |
| ID: 1369 | 1144 | 0,31896231 | 1,074 | 0,15138 | 1,100 | 0,76257957 | 0,977 |  |  |  |  | 1,145 | 1,041 | 1,066 | -2,3452  |
| ID: 1370 | 1145 | 0,75148567 | 1,043 | 0,83961 | 1,026 | 0,96449203 | 1,016 |  |  |  |  | 0,858 | 0,836 | 0,823 | 1,5796   |
| ID: 1372 | 1146 | 0,55011103 | 0,953 | 0,82891 | 1,017 | 0,42023383 | 0,938 |  |  |  |  | 1,222 | 1,202 | 1,282 | -6,2402  |
| ID: 1373 | 1147 | 0,1705372  | 1,140 | 0,21567 | 1,152 | 0,8835763  | 0,989 |  |  |  |  | 1,127 | 0,978 | 0,989 | -1,1122  |

|          |      |            |       |         |       |            |       |  |  |  |  |       |       |       |          |
|----------|------|------------|-------|---------|-------|------------|-------|--|--|--|--|-------|-------|-------|----------|
| ID: 1374 | 1148 | 0,88339551 | 1,016 | 0,51486 | 1,063 | 0,38553067 | 0,955 |  |  |  |  | 1,046 | 0,984 | 1,030 | -4,4660  |
| ID: 1375 | 1149 | 0,87358424 | 1,013 | 0,48066 | 0,901 | 0,37075998 | 1,124 |  |  |  |  | 1,051 | 1,167 | 1,038 | 12,4277  |
| ID: 1376 | 1150 | 0,92802498 | 1,004 | 0,73905 | 1,018 | 0,72505077 | 0,986 |  |  |  |  | 1,088 | 1,069 | 1,084 | -1,3838  |
| ID: 1377 | 1151 | 0,23193856 | 0,842 | 0,33804 | 0,875 | 0,82294366 | 0,963 |  |  |  |  | 0,913 | 1,044 | 1,084 | -3,6900  |
| ID: 1378 | 1152 | 0,1093334  | 1,281 | 0,02136 | 1,304 | 0,94601442 | 0,982 |  |  |  |  | 1,300 | 0,997 | 1,015 | -1,7734  |
| ID: 1379 | 1153 | 0,35128368 | 1,056 | 0,10691 | 1,107 | 0,36781462 | 0,954 |  |  |  |  | 1,080 | 0,976 | 1,023 | -4,5943  |
| ID: 1382 | 1154 | 0,34424884 | 1,173 | 0,71747 | 1,075 | 0,65632205 | 1,091 |  |  |  |  | 1,069 | 0,994 | 0,911 | 9,1109   |
| ID: 1383 | 1155 | 0,26421029 | 0,888 | 0,0764  | 0,820 | 0,42027457 | 1,083 |  |  |  |  | 1,018 | 1,242 | 1,147 | 8,2825   |
| ID: 1384 | 1156 | 0,14373254 | 1,157 | 0,80974 | 1,028 | 0,33907401 | 1,126 |  |  |  |  | 0,967 | 0,941 | 0,836 | 12,5598  |
| ID: 1385 | 1157 | 0,77020654 | 1,071 | 0,2092  | 1,342 | 0,1155045  | 0,798 |  |  |  |  | 1,288 | 0,96  | 1,203 | -20,1995 |
| ID: 1386 | 1158 | 0,74577287 | 0,983 | 0,97175 | 0,983 | 0,86288675 | 1,000 |  |  |  |  | 0,921 | 0,937 | 0,937 | 0,0000   |
| ID: 1388 | 1159 | 0,93355953 | 0,997 | 0,91791 | 0,997 | 0,98452385 | 1,000 |  |  |  |  | 1,105 | 1,108 | 1,108 | 0,0000   |
| ID: 1389 | 1160 | 0,03194949 | 1,221 | 0,22901 | 1,158 | 0,64639495 | 1,055 |  |  |  |  | 1,291 | 1,115 | 1,057 | 5,4872   |
| ID: 1390 | 1161 | 0,17250459 | 1,135 | 0,16849 | 1,143 | 0,93560285 | 0,993 |  |  |  |  | 1,018 | 0,891 | 0,897 | -0,6689  |
| ID: 1391 | 1162 | 0,06821574 | 1,117 | 0,11851 | 1,124 | 0,8522094  | 0,993 |  |  |  |  | 1,006 | 0,895 | 0,901 | -0,6659  |
| ID: 1392 | 1163 | 0,76424634 | 1,008 | 0,27787 | 1,032 | 0,17340507 | 0,977 |  |  |  |  | 1,105 | 1,071 | 1,096 | -2,2810  |
| ID: 1394 | 1164 | 0,95375759 | 1,002 | 0,26737 | 1,089 | 0,23880346 | 0,920 |  |  |  |  | 1,230 | 1,129 | 1,227 | -7,9870  |
| ID: 1395 | 1165 | 0,50071333 | 1,049 | 0,37288 | 0,921 | 0,08562308 | 1,139 |  |  |  |  | 1,158 | 1,258 | 1,104 | 13,9493  |
| ID: 1396 | 1166 | 0,89336387 | 1,015 | 0,60133 | 0,956 | 0,48269503 | 1,061 |  |  |  |  | 0,963 | 1,007 | 0,949 | 6,1117   |
| ID: 1398 | 1167 | 0,39710501 | 1,046 | 0,1205  | 1,111 | 0,34584778 | 0,941 |  |  |  |  | 1,108 | 0,997 | 1,059 | -5,8546  |
| ID: 1399 | 1168 | 0,90864311 | 1,000 | 0,3893  | 1,116 | 0,15692404 | 0,896 |  |  |  |  | 0,974 | 0,873 | 0,974 | -10,3696 |
| ID: 1400 | 1169 | 0,02451976 | 0,668 | 0,10926 | 0,558 | 0,66742561 | 1,197 |  |  |  |  | 0,703 | 1,260 | 1,053 | 19,6581  |
| ID: 1401 | 1170 | 0,93392609 | 1,012 | 0,46854 | 0,908 | 0,39192946 | 1,114 |  |  |  |  | 1,300 | 1,431 | 1,285 | 11,3619  |
| ID: 1402 | 1171 | 0,00020081 | 0,447 | 0,01919 | 0,383 | 0,77444871 | 1,166 |  |  |  |  | 0,449 | 1,172 | 1,005 | 16,6169  |
| ID: 1403 | 1172 | 0,03234217 | 1,564 | 0,14355 | 1,557 | 0,74017495 | 1,005 |  |  |  |  | 1,356 | 0,871 | 0,867 | 0,4614   |
| ID: 1404 | 1173 | 0,54101796 | 1,029 | 0,34742 | 1,066 | 0,5638047  | 0,965 |  |  |  |  | 1,367 | 1,282 | 1,328 | -3,4639  |
| ID: 1405 | 1174 | 0,47948055 | 0,958 | 0,49621 | 0,934 | 0,80341109 | 1,026 |  |  |  |  | 1,084 | 1,160 | 1,131 | 2,5641   |
| ID: 1407 | 1175 | 0,40068334 | 1,105 | 0,3537  | 1,128 | 0,8455932  | 0,979 |  |  |  |  | 0,967 | 0,857 | 0,875 | -2,0571  |
| ID: 1411 | 1176 | 0,39236822 | 1,085 | 0,00705 | 0,450 | 0,0608207  | 2,411 |  |  |  |  | 0,764 | 1,697 | 0,704 | 141,0511 |
| ID: 1412 | 1177 | 0,31023076 | 1,152 | 0,088   | 1,310 | 0,36185572 | 0,880 |  |  |  |  | 1,437 | 1,097 | 1,247 | -12,0289 |
| ID: 1413 | 1178 | 0,33465488 | 1,131 | 0,58985 | 1,052 | 0,50171305 | 1,075 |  |  |  |  | 1,172 | 1,114 | 1,036 | 7,5290   |
| ID: 1414 | 1179 | 0,7615807  | 1,031 | 0,19319 | 0,901 | 0,11251352 | 1,144 |  |  |  |  | 1,281 | 1,421 | 1,242 | 14,4122  |
| ID: 1415 | 1180 | 0,94828248 | 1,057 | 0,55449 | 1,082 | 0,51509157 | 0,977 |  |  |  |  | 0,722 | 0,667 | 0,683 | -2,3426  |
| ID: 1416 | 1181 | 0,27590065 | 1,072 | 0,85769 | 1,011 | 0,59920772 | 1,060 |  |  |  |  | 1,076 | 1,064 | 1,004 | 5,9761   |
| ID: 1417 | 1182 | 0,66665396 | 0,892 | 0,00286 | 0,433 | 0,07788769 | 2,058 |  |  |  |  | 0,692 | 1,597 | 0,776 | 105,7990 |
| ID: 1419 | 1183 | 0,12887134 | 0,854 | 0,77759 | 0,962 | 0,26307098 | 0,887 |  |  |  |  | 1,017 | 1,057 | 1,191 | -11,2510 |
| ID: 1420 | 1184 | 0,48463562 | 1,041 | 0,66088 | 1,024 | 0,7404078  | 1,016 |  |  |  |  | 1,139 | 1,112 | 1,094 | 1,6453   |
| ID: 1421 | 1185 | 0,64036208 | 1,082 | 0,44388 | 0,846 | 0,25396523 | 1,279 |  |  |  |  | 1,078 | 1,274 | 0,996 | 27,9116  |
| ID: 1422 | 1186 | 0,47746364 | 0,724 | 0,78219 | 0,983 | 0,51792448 | 0,737 |  |  |  |  | 1,199 | 1,220 | 1,655 | -26,2840 |
| ID: 1423 | 1187 | 0,79932014 | 0,990 | 0,37278 | 0,954 | 0,42919997 | 1,038 |  |  |  |  | 1,126 | 1,180 | 1,137 | 3,7819   |

|          |      |            |       |         |       |            |       |  |  |  |  |       |       |       |          |
|----------|------|------------|-------|---------|-------|------------|-------|--|--|--|--|-------|-------|-------|----------|
| ID: 1424 | 1188 | 0,3177539  | 1,147 | 0,10118 | 1,330 | 0,46288919 | 0,862 |  |  |  |  | 1,165 | 0,876 | 1,016 | -13,7795 |
| ID: 1425 | 1189 | 0,25242193 | 0,686 | 0,04729 | 0,549 | 0,40859532 | 1,249 |  |  |  |  | 0,562 | 1,023 | 0,819 | 24,9084  |
| ID: 1426 | 1190 | 0,21906278 | 1,256 | 0,14229 | 1,355 | 0,25618481 | 0,927 |  |  |  |  | 1,217 | 0,898 | 0,969 | -7,3271  |
| ID: 1427 | 1191 | 0,33642582 | 1,076 | 0,39157 | 1,082 | 0,87918765 | 0,994 |  |  |  |  | 1,120 | 1,035 | 1,041 | -0,5764  |
| ID: 1428 | 1192 | 0,30602835 | 0,964 | 0,324   | 0,963 | 0,97136699 | 1,001 |  |  |  |  | 1,059 | 1,100 | 1,099 | 0,0910   |
| ID: 1430 | 1193 | 0,16451236 | 1,085 | 0,52663 | 1,041 | 0,24665469 | 1,043 |  |  |  |  | 1,146 | 1,101 | 1,056 | 4,2614   |
| ID: 1432 | 1194 | 0,82569858 | 1,010 | 0,29201 | 1,054 | 0,35440707 | 0,959 |  |  |  |  | 1,267 | 1,202 | 1,254 | -4,1467  |
| ID: 1433 | 1195 | 0,23594077 | 1,356 | 0,05584 | 1,874 | 0,41307825 | 0,723 |  |  |  |  | 1,726 | 0,921 | 1,273 | -27,6512 |
| ID: 1434 | 1196 | 0,95422745 | 1,000 | 0,82352 | 0,979 | 0,81596085 | 1,021 |  |  |  |  | 0,992 | 1,013 | 0,992 | 2,1169   |
| ID: 1435 | 1197 | 0,00541723 | 1,223 | 0,54981 | 1,061 | 0,24071533 | 1,153 |  |  |  |  | 1,049 | 0,989 | 0,858 | 15,2681  |
| ID: 1436 | 1198 | 0,68531332 | 1,028 | 0,24198 | 1,091 | 0,33577119 | 0,942 |  |  |  |  | 1,223 | 1,121 | 1,190 | -5,7983  |
| ID: 1437 | 1199 | 0,43666866 | 1,192 | 0,26456 | 0,844 | 0,0477732  | 1,413 |  |  |  |  | 1,079 | 1,279 | 0,905 | 41,3260  |
| ID: 1438 | 1200 | 0,91558987 | 0,996 | 0,69399 | 1,026 | 0,53314108 | 0,971 |  |  |  |  | 1,250 | 1,218 | 1,255 | -2,9482  |
| ID: 1439 | 1201 | 0,86141867 | 1,007 | 0,96726 | 1,002 | 0,90731226 | 1,005 |  |  |  |  | 1,118 | 1,116 | 1,110 | 0,5405   |
| ID: 1440 | 1202 | 0,8011676  | 1,012 | 0,27791 | 1,082 | 0,21443447 | 0,936 |  |  |  |  | 1,152 | 1,065 | 1,138 | -6,4148  |
| ID: 1441 | 1203 | 0,52395521 | 1,031 | 0,11583 | 0,904 | 0,05363357 | 1,140 |  |  |  |  | 1,098 | 1,214 | 1,065 | 13,9906  |
| ID: 1443 | 1204 | 0,70603057 | 0,962 | 0,35141 | 1,153 | 0,14429196 | 0,835 |  |  |  |  | 0,762 | 0,661 | 0,792 | -16,5404 |
| ID: 1444 | 1205 | 0,40452749 | 0,966 | 0,60396 | 0,986 | 0,63617057 | 0,980 |  |  |  |  | 1,053 | 1,068 | 1,090 | -2,0183  |
| ID: 1445 | 1206 | 0,31662383 | 1,151 | 0,39331 | 1,152 | 0,88567736 | 0,999 |  |  |  |  | 0,968 | 0,84  | 0,841 | -0,1189  |
| ID: 1446 | 1207 | 0,94656059 | 1,010 | 0,63618 | 1,144 | 0,68777653 | 0,883 |  |  |  |  | 0,914 | 0,799 | 0,905 | -11,7127 |
| ID: 1447 | 1208 | 0,37811376 | 0,876 | 0,52071 | 0,916 | 0,71576985 | 0,956 |  |  |  |  | 0,987 | 1,077 | 1,127 | -4,4366  |
| ID: 1448 | 1209 | 0,57140183 | 0,907 | 0,81264 | 0,971 | 0,70347143 | 0,934 |  |  |  |  | 0,66  | 0,68  | 0,728 | -6,5934  |
| ID: 1450 | 1210 | 0,5542623  | 0,936 | 0,80749 | 0,977 | 0,68591139 | 0,958 |  |  |  |  | 0,934 | 0,956 | 0,998 | -4,2084  |
| ID: 1451 | 1211 | 0,29994841 | 1,050 | 0,93831 | 0,996 | 0,19428099 | 1,054 |  |  |  |  | 1,079 | 1,083 | 1,028 | 5,3502   |
| ID: 1452 | 1212 | 0,32782807 | 1,039 | 0,8147  | 1,011 | 0,28752873 | 1,028 |  |  |  |  | 1,148 | 1,136 | 1,105 | 2,8054   |
| ID: 1455 | 1213 | 0,91622982 | 0,989 | 0,6927  | 0,941 | 0,72952531 | 1,051 |  |  |  |  | 0,801 | 0,851 | 0,81  | 5,0617   |
| ID: 1456 | 1214 | 0,80968238 | 1,013 | 0,25637 | 1,063 | 0,19779838 | 0,953 |  |  |  |  | 1,174 | 1,104 | 1,159 | -4,7455  |
| ID: 1457 | 1215 | 0,06267832 | 0,759 | 0,46581 | 0,926 | 0,19082402 | 0,820 |  |  |  |  | 0,926 | 1,000 | 1,220 | -18,0328 |
| ID: 1458 | 1216 | 0,44571169 | 1,150 | 0,41486 | 0,877 | 0,1650369  | 1,312 |  |  |  |  | 0,781 | 0,891 | 0,679 | 31,2224  |
| ID: 1459 | 1217 | 0,54892094 | 0,832 | 0,61951 | 1,053 | 0,4066477  | 0,790 |  |  |  |  | 0,874 | 0,83  | 1,050 | -20,9524 |
| ID: 1460 | 1218 | 0,34497629 | 1,204 | 0,8414  | 0,509 | 0,9717732  | 2,366 |  |  |  |  | 0,786 | 1,545 | 0,653 | 136,6003 |
| ID: 1461 | 1219 | 0,89272787 | 1,047 | 0,3504  | 1,287 | 0,33038087 | 0,814 |  |  |  |  | 1,045 | 0,812 | 0,998 | -18,6373 |
| ID: 1462 | 1220 | 0,41963426 | 1,133 | 0,05856 | 1,357 | 0,38966875 | 0,835 |  |  |  |  | 0,886 | 0,653 | 0,782 | -16,4962 |
| ID: 1463 | 1221 | 0,62614656 | 1,030 | 0,79092 | 1,020 | 0,86216621 | 1,010 |  |  |  |  | 1,252 | 1,228 | 1,216 | 0,9868   |
| ID: 1465 | 1222 | 0,4807722  | 1,213 | 0,1847  | 1,578 | 0,35037523 | 0,769 |  |  |  |  | 1,185 | 0,751 | 0,977 | -23,1320 |
| ID: 1468 | 1223 | 0,0362167  | 1,855 | 0,0385  | 2,066 | 0,73841834 | 0,898 |  |  |  |  | 1,564 | 0,757 | 0,843 | -10,2017 |
| ID: 1469 | 1224 | 0,76713911 | 0,823 | 0,29857 | 0,370 | 0,38148315 | 2,222 |  |  |  |  | 0,722 | 1,949 | 0,877 | 122,2349 |
| ID: 1470 | 1225 | 0,93550341 | 0,934 | 0,41697 | 0,450 | 0,39702891 | 2,076 |  |  |  |  | 0,806 | 1,792 | 0,863 | 107,6477 |
| ID: 1471 | 1226 | 0,01304136 | 1,136 | 0,03263 | 1,137 | 0,96561    | 0,999 |  |  |  |  | 1,150 | 1,011 | 1,012 | -0,0988  |
| ID: 1472 | 1227 | 0,89265182 | 0,985 | 0,28657 | 0,950 | 0,57423113 | 1,037 |  |  |  |  | 1,003 | 1,056 | 1,018 | 3,7328   |

|          |      |            |       |         |       |            |       |  |  |  |  |       |       |       |          |
|----------|------|------------|-------|---------|-------|------------|-------|--|--|--|--|-------|-------|-------|----------|
| ID: 1473 | 1228 | 0,21239159 | 1,064 | 0,00116 | 1,191 | 0,02642495 | 0,893 |  |  |  |  | 1,083 | 0,909 | 1,018 | -10,7073 |
| ID: 1474 | 1229 | 0,10957164 | 1,212 | 0,22394 | 1,177 | 0,46087284 | 1,029 |  |  |  |  | 1,116 | 0,948 | 0,921 | 2,9316   |
| ID: 1476 | 1230 | 0,60235772 | 1,036 | 0,66171 | 1,036 | 0,96745119 | 1,000 |  |  |  |  | 1,139 | 1,099 | 1,099 | 0,0000   |
| ID: 1477 | 1231 | 0,5020247  | 0,973 | 0,52635 | 0,963 | 0,83794866 | 1,010 |  |  |  |  | 1,104 | 1,146 | 1,135 | 0,9692   |
| ID: 1479 | 1232 | 0,44746005 | 0,923 | 0,21323 | 0,891 | 0,55054306 | 1,037 |  |  |  |  | 0,953 | 1,070 | 1,032 | 3,6822   |
| ID: 1480 | 1233 | 0,14145475 | 1,178 | 0,02498 | 1,342 | 0,32751024 | 0,878 |  |  |  |  | 1,000 | 0,745 | 0,849 | -12,2497 |
| ID: 1482 | 1234 | 0,41904872 | 1,042 | 0,25281 | 1,044 | 0,99701357 | 0,998 |  |  |  |  | 1,051 | 1,007 | 1,009 | -0,1982  |
| ID: 1483 | 1235 | 0,47221852 | 0,966 | 0,24243 | 0,943 | 0,61508488 | 1,024 |  |  |  |  | 1,131 | 1,199 | 1,171 | 2,3911   |
| ID: 1484 | 1236 | 0,92521748 | 0,983 | 0,85956 | 1,036 | 0,77453151 | 0,949 |  |  |  |  | 1,243 | 1,200 | 1,265 | -5,1383  |
| ID: 1485 | 1237 | 0,52792298 | 1,093 | 0,86614 | 1,006 | 0,74291582 | 1,087 |  |  |  |  | 0,878 | 0,873 | 0,803 | 8,7173   |
| ID: 1486 | 1238 | 0,58928423 | 1,044 | 0,47946 | 1,079 | 0,63441375 | 0,968 |  |  |  |  | 0,969 | 0,898 | 0,928 | -3,2328  |
| ID: 1487 | 1239 | 0,21478525 | 1,180 | 0,79494 | 1,017 | 0,4911704  | 1,161 |  |  |  |  | 0,713 | 0,701 | 0,604 | 16,0596  |
| ID: 1488 | 1240 | 0,9939915  | 1,004 | 0,18194 | 1,105 | 0,06294086 | 0,908 |  |  |  |  | 1,096 | 0,992 | 1,092 | -9,1575  |
| ID: 1489 | 1241 | 0,28440146 | 0,887 | 0,48166 | 0,889 | 0,91199651 | 0,998 |  |  |  |  | 0,911 | 1,025 | 1,027 | -0,1947  |
| ID: 1490 | 1242 | 0,56775936 | 0,958 | 0,46605 | 0,929 | 0,72449795 | 1,031 |  |  |  |  | 1,007 | 1,084 | 1,051 | 3,1399   |
| ID: 1491 | 1243 | 0,69449986 | 1,110 | 0,73018 | 0,918 | 0,39133754 | 1,210 |  |  |  |  | 1,026 | 1,118 | 0,924 | 20,9957  |
| ID: 1492 | 1244 | 0,24948392 | 0,951 | 0,47261 | 0,973 | 0,61518053 | 0,977 |  |  |  |  | 1,224 | 1,258 | 1,287 | -2,2533  |
| ID: 1493 | 1245 | 0,34989319 | 1,087 | 0,22192 | 1,138 | 0,59094209 | 0,955 |  |  |  |  | 1,017 | 0,894 | 0,936 | -4,4872  |
| ID: 1494 | 1246 | 0,91426976 | 0,961 | 0,6348  | 1,098 | 0,5885656  | 0,875 |  |  |  |  | 0,949 | 0,864 | 0,987 | -12,4620 |
| ID: 1495 | 1247 | 0,470802   | 0,677 | 0,34945 | 1,170 | 0,24888901 | 0,578 |  |  |  |  | 0,86  | 0,735 | 1,271 | -42,1715 |
| ID: 1496 | 1248 | 0,46770095 | 1,087 | 0,72059 | 0,959 | 0,37020432 | 1,134 |  |  |  |  | 1,115 | 1,163 | 1,026 | 13,3528  |
| ID: 1497 | 1249 | 0,79052489 | 0,978 | 0,83562 | 1,029 | 0,60484748 | 0,951 |  |  |  |  | 1,080 | 1,050 | 1,104 | -4,8913  |
| ID: 1498 | 1250 | 0,84905148 | 1,079 | 0,27366 | 0,467 | 0,16678475 | 2,309 |  |  |  |  | 0,768 | 1,644 | 0,712 | 130,8989 |
| ID: 1499 | 1251 | 0,80312585 | 1,015 | 0,63562 | 1,033 | 0,74773699 | 0,983 |  |  |  |  | 0,999 | 0,967 | 0,984 | -1,7276  |
| ID: 1500 | 1252 | 0,62244523 | 1,062 | 0,47626 | 0,586 | 0,33148974 | 1,813 |  |  |  |  | 0,972 | 1,659 | 0,915 | 81,3115  |
| ID: 1501 | 1253 | 0,6717356  | 0,968 | 0,6348  | 0,927 | 0,79741136 | 1,044 |  |  |  |  | 0,849 | 0,916 | 0,877 | 4,4470   |
| ID: 1502 | 1254 | 0,54405082 | 1,077 | 0,29506 | 1,131 | 0,74181433 | 0,952 |  |  |  |  | 0,793 | 0,701 | 0,736 | -4,7554  |
| ID: 1503 | 1255 | 0,8856074  | 1,008 | 0,40053 | 1,045 | 0,56579298 | 0,965 |  |  |  |  | 1,195 | 1,144 | 1,185 | -3,4599  |
| ID: 1504 | 1256 | 0,73406473 | 0,986 | 0,88865 | 0,991 | 0,8919193  | 0,995 |  |  |  |  | 1,045 | 1,055 | 1,060 | -0,4717  |
| ID: 1505 | 1257 | 0,39740819 | 1,063 | 0,57785 | 0,969 | 0,09241582 | 1,098 |  |  |  |  | 1,056 | 1,090 | 0,993 | 9,7684   |
| ID: 1506 | 1258 | 0,50935095 | 1,040 | 0,88966 | 1,004 | 0,77088621 | 1,035 |  |  |  |  | 1,231 | 1,226 | 1,184 | 3,5473   |
| ID: 1509 | 1259 | 0,71652404 | 1,016 | 0,21451 | 1,100 | 0,86860088 | 0,924 |  |  |  |  | 1,015 | 0,923 | 0,999 | -7,6076  |
| ID: 1511 | 1260 | 0,42122979 | 1,145 | 0,96037 | 0,970 | 0,4584868  | 1,181 |  |  |  |  | 0,992 | 1,023 | 0,866 | 18,1293  |
| ID: 1512 | 1261 | 0,42439699 | 1,087 | 0,22376 | 1,098 | 0,97110799 | 0,990 |  |  |  |  | 1,079 | 0,983 | 0,993 | -1,0070  |
| ID: 1515 | 1262 | 0,66517932 | 1,035 | 0,84758 | 0,969 | 0,61967405 | 1,068 |  |  |  |  | 0,985 | 1,017 | 0,952 | 6,8277   |
| ID: 1516 | 1263 | 0,49782188 | 0,815 | 0,68318 | 1,039 | 0,39648455 | 0,784 |  |  |  |  | 0,979 | 0,942 | 1,201 | -21,5654 |
| ID: 1520 | 1264 | 0,07380359 | 1,241 | 0,02224 | 1,329 | 0,638849   | 0,934 |  |  |  |  | 1,419 | 1,068 | 1,143 | -6,5617  |
| ID: 1521 | 1265 | 0,84052399 | 1,006 | 0,45529 | 0,973 | 0,39806128 | 1,034 |  |  |  |  | 1,094 | 1,124 | 1,087 | 3,4039   |
| ID: 1522 | 1266 | 0,38199132 | 0,678 | 0,99536 | 1,024 | 0,36028745 | 0,662 |  |  |  |  | 1,017 | 0,993 | 1,500 | -33,8000 |
| ID: 1523 | 1267 | 0,69102109 | 0,922 | 0,04243 | 1,284 | 0,06262625 | 0,718 |  |  |  |  | 0,895 | 0,697 | 0,971 | -28,2183 |

|          |             |            |       |         |       |            |       |  |  |  |  |       |       |       |          |
|----------|-------------|------------|-------|---------|-------|------------|-------|--|--|--|--|-------|-------|-------|----------|
| ID: 1525 | <b>1268</b> | 0,89513074 | 0,989 | 0,22737 | 1,115 | 0,19106537 | 0,886 |  |  |  |  | 1,478 | 1,325 | 1,495 | -11,3712 |
| ID: 1527 | <b>1269</b> | 0,6376994  | 1,073 | 0,65589 | 1,077 | 0,98212925 | 0,997 |  |  |  |  | 0,939 | 0,872 | 0,875 | -0,3429  |
| ID: 1528 | <b>1270</b> | 0,13478563 | 0,778 | 0,26102 | 0,829 | 0,67164129 | 0,938 |  |  |  |  | 1,049 | 1,265 | 1,349 | -6,2268  |
| ID: 1529 | <b>1271</b> | 0,63538728 | 1,046 | 0,95618 | 1,003 | 0,32965555 | 1,043 |  |  |  |  | 1,164 | 1,161 | 1,113 | 4,3127   |
| ID: 1530 | <b>1272</b> | 0,88600208 | 1,031 | 0,62825 | 0,949 | 0,43513053 | 1,086 |  |  |  |  | 1,146 | 1,208 | 1,112 | 8,6331   |
| ID: 1531 | <b>1273</b> | 0,95236769 | 1,005 | 0,5975  | 0,978 | 0,32471759 | 1,028 |  |  |  |  | 1,104 | 1,129 | 1,098 | 2,8233   |
| ID: 1532 | <b>1274</b> | 0,27987156 | 0,935 | 0,68966 | 0,832 | 0,88918663 | 1,123 |  |  |  |  | 1,115 | 1,340 | 1,193 | 12,3219  |
| ID: 1533 | <b>1275</b> | 0,58336095 | 1,082 | 0,75564 | 1,027 | 0,95379708 | 1,054 |  |  |  |  | 0,946 | 0,921 | 0,874 | 5,3776   |
| ID: 1535 | <b>1276</b> | 0,25697755 | 0,758 | 0,04777 | 0,717 | 0,63989915 | 1,057 |  |  |  |  | 0,849 | 1,184 | 1,120 | 5,7143   |
| ID: 1536 | <b>1277</b> | 0,55007232 | 0,813 | 0,60542 | 0,937 | 0,75626493 | 0,868 |  |  |  |  | 0,819 | 0,874 | 1,007 | -13,2075 |
| ID: 1537 | <b>1278</b> | 0,99319459 | 1,020 | 0,81977 | 0,986 | 0,57788932 | 1,034 |  |  |  |  | 0,948 | 0,961 | 0,929 | 3,4446   |
| ID: 1538 | <b>1279</b> | 0,08917835 | 1,114 | 0,34935 | 1,057 | 0,16034561 | 1,055 |  |  |  |  | 1,042 | 0,986 | 0,935 | 5,4545   |
| ID: 1539 | <b>1280</b> | 0,37561599 | 0,810 | 0,47716 | 0,919 | 0,64074935 | 0,882 |  |  |  |  | 0,746 | 0,812 | 0,921 | -11,8350 |
| ID: 1541 | <b>1281</b> | 0,66179154 | 0,859 | 0,89842 | 0,939 | 0,78416678 | 0,915 |  |  |  |  | 0,929 | 0,989 | 1,081 | -8,5106  |
| ID: 1542 | <b>1282</b> | 0,07345153 | 1,118 | 0,21475 | 1,109 | 0,95122535 | 1,008 |  |  |  |  | 0,958 | 0,864 | 0,857 | 0,8168   |
| ID: 1544 | <b>1283</b> | 0,55359935 | 0,941 | 0,60557 | 1,069 | 0,36803157 | 0,880 |  |  |  |  | 0,943 | 0,882 | 1,002 | -11,9760 |
| ID: 1545 | <b>1284</b> | 0,43898297 | 1,035 | 0,42284 | 0,969 | 0,06858823 | 1,067 |  |  |  |  | 1,014 | 1,046 | 0,98  | 6,7347   |
| ID: 1546 | <b>1285</b> | 0,87134737 | 0,985 | 0,74938 | 0,933 | 0,79501741 | 1,056 |  |  |  |  | 1,223 | 1,311 | 1,241 | 5,6406   |
| ID: 1548 | <b>1286</b> | 0,99045551 | 1,006 | 0,95807 | 0,993 | 0,94108349 | 1,013 |  |  |  |  | 0,831 | 0,837 | 0,826 | 1,3317   |
| ID: 1552 | <b>1287</b> | 0,54721663 | 0,960 | 0,46151 | 0,940 | 0,72049661 | 1,021 |  |  |  |  | 1,094 | 1,164 | 1,140 | 2,1053   |
| ID: 1561 | <b>1288</b> | 0,00658219 | 1,368 | 0,92147 | 0,999 | 9,0753E-05 | 1,369 |  |  |  |  | 1,126 | 1,127 | 0,823 | 36,9380  |
| ID: 1562 | <b>1289</b> | 0,76089592 | 1,014 | 0,06228 | 1,088 | 0,35628701 | 0,933 |  |  |  |  | 0,993 | 0,913 | 0,979 | -6,7416  |
| ID: 1563 | <b>1290</b> | 0,47854161 | 1,246 | 0,18314 | 1,516 | 0,36157216 | 0,822 |  |  |  |  | 0,693 | 0,457 | 0,556 | -17,8058 |
| ID: 1564 | <b>1291</b> | 0,97264037 | 0,970 | 0,94884 | 1,008 | 0,94179347 | 0,963 |  |  |  |  | 0,649 | 0,644 | 0,669 | -3,7369  |
| ID: 1566 | <b>1292</b> | 0,74195924 | 1,078 | 0,40827 | 1,207 | 0,52554794 | 0,894 |  |  |  |  | 0,852 | 0,706 | 0,79  | -10,6329 |
