# Supplementary material for: Sublethal Exposure Effects of the Neonicotinoid Clothianidin Strongly Modify the Brain Transcriptome and Proteome in the Male Moth Agrotis ipsilon
Source: MDPI journal article supplement (doi:10.3390/insects12020152), 2021-02-11
Supplement: s1 [file s1]

| TRINITY CODE             | sampleA | sampleB | logFC      | logCPM     | PValue   | FDR      |
|--------------------------|---------|---------|------------|------------|----------|----------|
| TRINITY_DN25122_c0_g1_i1 | dmso    | control | 10,6640277 | 1,90508919 | 1,68E-48 | 1,28E-45 |
| TRINITY_DN36952_c0_g1_i1 | dmso    | control | 9,29488898 | 0,59679319 | 1,15E-23 | 1,88E-21 |
| TRINITY_DN18250_c0_g1_i1 | dmso    | control | 9,19400457 | 0,50333148 | 6,43E-23 | 9,77E-21 |
| TRINITY_DN4321_c0_g1_i1  | dmso    | control | 8,68806415 | 0,02634119 | 4,04E-20 | 4,78E-18 |
| TRINITY_DN30866_c0_g1_i1 | dmso    | control | 8,58128291 | -0,0736318 | 6,34E-19 | 6,64E-17 |
| TRINITY_DN6887_c0_g1_i1  | dmso    | control | 5,90098246 | 2,82913333 | 1,84E-59 | 2,41E-56 |
| TRINITY_DN42652_c0_g1_i1 | dmso    | control | 5,80881397 | -0,3991358 | 9,63E-14 | 5,63E-12 |
| TRINITY_DN21355_c0_g1_i1 | dmso    | control | 5,56224706 | 1,02874623 | 4,04E-26 | 7,72E-24 |
| TRINITY_DN9441_c0_g1_i1  | dmso    | control | 5,52397279 | 0,98493676 | 1,53E-19 | 1,71E-17 |
| TRINITY_DN25183_c0_g1_i1 | dmso    | control | 5,50066191 | 0,0994009  | 1,93E-17 | 1,71E-15 |
| TRINITY_DN21744_c0_g1_i1 | dmso    | control | 5,48146831 | 0,08540881 | 8,82E-18 | 8,12E-16 |
| TRINITY_DN15414_c0_g1_i1 | dmso    | control | 5,35339094 | 1,11941811 | 6,51E-28 | 1,54E-25 |
| TRINITY_DN24048_c0_g1_i1 | dmso    | control | 5,2921991  | 1,07988128 | 6,21E-27 | 1,32E-24 |
| TRINITY_DN24800_c0_g1_i1 | dmso    | control | 5,25616325 | 0,39294582 | 5,36E-19 | 5,69E-17 |
| TRINITY_DN26211_c0_g1_i1 | dmso    | control | 5,22062452 | -0,1391093 | 1,62E-14 | 1,05E-12 |
| TRINITY_DN12087_c0_g1_i1 | dmso    | control | 5,20150958 | 2,04041247 | 2,00E-40 | 1,11E-37 |
| TRINITY_DN7730_c0_g1_i1  | dmso    | control | 5,11670493 | 1,35839763 | 3,91E-30 | 1,13E-27 |
| TRINITY_DN7478_c0_g1_i1  | dmso    | control | 4,94137295 | 2,40357482 | 9,84E-44 | 6,18E-41 |
| TRINITY_DN19844_c0_g1_i1 | dmso    | control | 4,90916897 | 2,3070805  | 5,25E-42 | 3,03E-39 |
| TRINITY_DN43861_c0_g1_i1 | dmso    | control | 4,87988615 | 0,39982216 | 1,49E-18 | 1,49E-16 |
| TRINITY_DN13627_c0_g1_i1 | dmso    | control | 4,76615755 | 1,36640545 | 1,03E-27 | 2,37E-25 |
| TRINITY_DN13899_c0_g1_i1 | dmso    | control | 4,70509227 | 3,30924624 | 6,06E-67 | 2,19E-63 |
| TRINITY_DN15148_c0_g1_i1 | dmso    | control | 4,6848804  | 3,54573907 | 3,04E-63 | 6,27E-60 |
| TRINITY_DN33832_c0_g1_i1 | dmso    | control | 4,60001212 | -0,2108762 | 4,31E-13 | 2,35E-11 |
| TRINITY_DN4579_c0_g1_i1  | dmso    | control | 4,51458775 | -0,2853569 | 1,47E-12 | 7,37E-11 |
| TRINITY_DN28220_c0_g1_i1 | dmso    | control | 4,45774    | -0,3462589 | 4,32E-12 | 1,97E-10 |
| TRINITY_DN32597_c0_g1_i1 | dmso    | control | 4,36179729 | 2,89552187 | 5,34E-50 | 4,28E-47 |
| TRINITY_DN33490_c0_g1_i1 | dmso    | control | 4,30083428 | 0,17044338 | 2,66E-14 | 1,69E-12 |
| TRINITY_DN3014_c0_g1_i1  | dmso    | control | 4,2839123  | 3,2479122  | 1,34E-60 | 1,95E-57 |
| TRINITY_DN7585_c0_g1_i1  | dmso    | control | 4,23764156 | 2,48919626 | 1,81E-34 | 7,06E-32 |

|                          |      |         |            |            |          |          |
|--------------------------|------|---------|------------|------------|----------|----------|
| TRINITY_DN35882_c0_g1_i1 | dmso | control | 4,21003425 | 1,80322437 | 4,39E-31 | 1,29E-28 |
| TRINITY_DN57543_c0_g1_i1 | dmso | control | 4,19915324 | -0,5515206 | 3,20E-10 | 1,09E-08 |
| TRINITY_DN17038_c0_g1_i1 | dmso | control | 4,13624194 | 1,71545873 | 6,96E-27 | 1,46E-24 |
| TRINITY_DN56314_c0_g1_i1 | dmso | control | 4,09867378 | 0,90891123 | 1,70E-19 | 1,87E-17 |
| TRINITY_DN12532_c0_g1_i1 | dmso | control | 4,08262099 | 1,33725127 | 2,46E-22 | 3,45E-20 |
| TRINITY_DN3942_c0_g1_i1  | dmso | control | 4,00472372 | 0,34592512 | 1,65E-15 | 1,18E-13 |
| TRINITY_DN24435_c0_g1_i1 | dmso | control | 3,98021512 | 1,14457669 | 8,55E-19 | 8,76E-17 |
| TRINITY_DN14610_c0_g1_i1 | dmso | control | 3,967074   | 0,64476855 | 4,94E-17 | 4,25E-15 |
| TRINITY_DN1732_c0_g1_i1  | dmso | control | 3,95103075 | 1,9177001  | 5,62E-28 | 1,38E-25 |
| TRINITY_DN22265_c0_g1_i1 | dmso | control | 3,93412935 | 1,89360842 | 2,07E-25 | 3,83E-23 |
| TRINITY_DN27243_c0_g1_i1 | dmso | control | 3,91332138 | 2,20134294 | 4,60E-32 | 1,54E-29 |
| TRINITY_DN28411_c0_g1_i1 | dmso | control | 3,87803475 | 0,04363143 | 1,91E-12 | 9,30E-11 |
| TRINITY_DN3777_c0_g1_i1  | dmso | control | 3,86588719 | 2,21633011 | 4,81E-09 | 1,32E-07 |
| TRINITY_DN3118_c0_g1_i1  | dmso | control | 3,80083774 | 1,51284142 | 2,14E-22 | 3,08E-20 |
| TRINITY_DN5661_c0_g1_i1  | dmso | control | 3,7270885  | 6,64211005 | 6,69E-34 | 2,42E-31 |
| TRINITY_DN33851_c0_g1_i1 | dmso | control | 3,71625535 | 1,29074575 | 3,55E-20 | 4,23E-18 |
| TRINITY_DN54531_c0_g1_i1 | dmso | control | 3,69535875 | 0,66723849 | 7,21E-17 | 6,13E-15 |
| TRINITY_DN22788_c0_g1_i1 | dmso | control | 3,66734223 | 2,58718398 | 4,93E-37 | 2,23E-34 |
| TRINITY_DN19460_c0_g1_i1 | dmso | control | 3,66176989 | 4,23063356 | 2,29E-59 | 2,76E-56 |
| TRINITY_DN23319_c0_g1_i1 | dmso | control | 3,65609928 | -0,1490026 | 2,04E-10 | 7,14E-09 |
| TRINITY_DN34107_c0_g1_i1 | dmso | control | 3,63117515 | 2,44989738 | 8,95E-27 | 1,85E-24 |
| TRINITY_DN13418_c0_g1_i1 | dmso | control | 3,60178281 | -0,0228025 | 3,43E-12 | 1,59E-10 |
| TRINITY_DN22273_c0_g1_i1 | dmso | control | 3,59577979 | 3,78041297 | 1,35E-60 | 1,95E-57 |
| TRINITY_DN16982_c0_g1_i1 | dmso | control | 3,59007726 | 2,47808455 | 2,67E-34 | 1,02E-31 |
| TRINITY_DN33188_c0_g1_i1 | dmso | control | 3,56026125 | 1,48308407 | 1,02E-21 | 1,40E-19 |
| TRINITY_DN152_c0_g1_i1   | dmso | control | 3,51534236 | 5,19652097 | 3,45E-33 | 1,22E-30 |
| TRINITY_DN34410_c0_g1_i1 | dmso | control | 3,43692204 | 0,00631153 | 2,09E-10 | 7,29E-09 |
| TRINITY_DN39107_c0_g1_i1 | dmso | control | 3,42803799 | 0,31583598 | 1,57E-12 | 7,76E-11 |
| TRINITY_DN25236_c0_g1_i1 | dmso | control | 3,36290965 | 3,71423563 | 7,24E-45 | 5,23E-42 |
| TRINITY_DN13988_c0_g1_i1 | dmso | control | 3,36132614 | 0,71707894 | 3,55E-14 | 2,21E-12 |
| TRINITY_DN44422_c0_g1_i1 | dmso | control | 3,30816476 | -0,0674004 | 2,71E-09 | 7,91E-08 |

|                          |      |         |            |            |          |          |
|--------------------------|------|---------|------------|------------|----------|----------|
| TRINITY_DN3362_c0_g1_i1  | dmso | control | 3,30083451 | 1,7616712  | 3,99E-19 | 4,30E-17 |
| TRINITY_DN21762_c0_g1_i1 | dmso | control | 3,26213243 | 0,03070443 | 4,66E-11 | 1,81E-09 |
| TRINITY_DN19726_c0_g1_i1 | dmso | control | 3,21512904 | 1,94916362 | 4,54E-23 | 6,97E-21 |
| TRINITY_DN12473_c0_g1_i1 | dmso | control | 3,16963383 | 5,54772136 | 1,26E-12 | 6,47E-11 |
| TRINITY_DN6435_c0_g1_i1  | dmso | control | 3,1650692  | 4,64205417 | 3,00E-40 | 1,61E-37 |
| TRINITY_DN45980_c0_g1_i1 | dmso | control | 3,14524208 | -0,3758013 | 6,40E-08 | 1,47E-06 |
| TRINITY_DN22516_c0_g1_i1 | dmso | control | 3,14149087 | 1,59222562 | 5,17E-20 | 6,02E-18 |
| TRINITY_DN11756_c0_g1_i1 | dmso | control | 3,13564145 | 4,24721406 | 6,67E-53 | 6,88E-50 |
| TRINITY_DN8591_c0_g1_i1  | dmso | control | 3,13535966 | -0,3749302 | 1,43E-07 | 3,06E-06 |
| TRINITY_DN4317_c0_g1_i1  | dmso | control | 3,11836406 | 0,65830837 | 1,64E-13 | 9,34E-12 |
| TRINITY_DN19951_c0_g1_i1 | dmso | control | 3,0920087  | 0,64473471 | 2,49E-13 | 1,40E-11 |
| TRINITY_DN42973_c0_g1_i1 | dmso | control | 3,07057488 | 0,54954161 | 9,83E-10 | 3,08E-08 |
| TRINITY_DN2310_c0_g1_i1  | dmso | control | 3,02990314 | 2,41776128 | 5,57E-27 | 1,20E-24 |
| TRINITY_DN12898_c0_g1_i1 | dmso | control | 3,00680544 | 3,5396557  | 2,89E-37 | 1,35E-34 |
| TRINITY_DN32323_c0_g1_i1 | dmso | control | 2,97487617 | 2,03772494 | 3,37E-15 | 2,35E-13 |
| TRINITY_DN1781_c0_g1_i1  | dmso | control | 2,92658667 | 5,30333271 | 7,13E-78 | 3,43E-74 |
| TRINITY_DN23130_c0_g1_i1 | dmso | control | 2,92238341 | 2,48485393 | 8,93E-25 | 1,59E-22 |
| TRINITY_DN14897_c0_g1_i1 | dmso | control | 2,88754618 | -0,1492245 | 1,43E-08 | 3,68E-07 |
| TRINITY_DN45753_c0_g1_i1 | dmso | control | 2,85904824 | 1,30648205 | 9,04E-16 | 6,80E-14 |
| TRINITY_DN13280_c0_g1_i1 | dmso | control | 2,8402165  | 3,04287076 | 2,94E-12 | 1,39E-10 |
| TRINITY_DN33480_c0_g1_i1 | dmso | control | 2,8090417  | 1,82023413 | 1,60E-19 | 1,78E-17 |
| TRINITY_DN8633_c0_g1_i1  | dmso | control | 2,7995424  | 1,45957499 | 2,47E-16 | 1,99E-14 |
| TRINITY_DN36970_c0_g1_i1 | dmso | control | 2,79641257 | 0,29573937 | 3,58E-10 | 1,21E-08 |
| TRINITY_DN12869_c0_g1_i1 | dmso | control | 2,79491289 | 1,41585819 | 3,18E-15 | 2,24E-13 |
| TRINITY_DN21333_c0_g1_i1 | dmso | control | 2,76665884 | 3,7210083  | 1,67E-27 | 3,65E-25 |
| TRINITY_DN22745_c0_g1_i1 | dmso | control | 2,76116415 | 2,790649   | 1,12E-27 | 2,52E-25 |
| TRINITY_DN29317_c0_g1_i1 | dmso | control | 2,75508265 | 1,6706653  | 1,48E-15 | 1,07E-13 |
| TRINITY_DN6474_c0_g1_i1  | dmso | control | 2,74684064 | 3,04546414 | 1,76E-31 | 5,65E-29 |
| TRINITY_DN12761_c0_g1_i1 | dmso | control | 2,70320486 | 2,18193035 | 4,27E-08 | 1,00E-06 |
| TRINITY_DN37877_c0_g1_i1 | dmso | control | 2,6823359  | -0,1788554 | 2,04E-07 | 4,20E-06 |
| TRINITY_DN16776_c0_g1_i1 | dmso | control | 2,67487116 | 0,29085229 | 3,47E-09 | 9,80E-08 |

|                          |      |         |            |            |          |          |
|--------------------------|------|---------|------------|------------|----------|----------|
| TRINITY_DN43259_c0_g1_i1 | dmso | control | 2,64446475 | 2,82597495 | 6,94E-23 | 1,04E-20 |
| TRINITY_DN348_c0_g1_i1   | dmso | control | 2,63367394 | 3,38668475 | 1,11E-22 | 1,61E-20 |
| TRINITY_DN20488_c0_g1_i1 | dmso | control | 2,6299605  | 1,3442514  | 6,16E-09 | 1,67E-07 |
| TRINITY_DN32931_c0_g1_i1 | dmso | control | 2,60651961 | 8,02676543 | 3,13E-51 | 2,66E-48 |
| TRINITY_DN3145_c0_g1_i1  | dmso | control | 2,57556874 | 2,66140126 | 1,44E-23 | 2,31E-21 |
| TRINITY_DN12322_c0_g1_i1 | dmso | control | 2,56789494 | 5,50463563 | 8,00E-52 | 7,22E-49 |
| TRINITY_DN36775_c0_g1_i1 | dmso | control | 2,53892848 | 0,00938299 | 1,18E-07 | 2,58E-06 |
| TRINITY_DN48332_c0_g1_i1 | dmso | control | 2,53776509 | 0,44570409 | 5,87E-08 | 1,35E-06 |
| TRINITY_DN33132_c0_g1_i1 | dmso | control | 2,5157502  | 3,24947524 | 1,28E-19 | 1,47E-17 |
| TRINITY_DN27989_c0_g1_i1 | dmso | control | 2,4951253  | 3,33079921 | 3,84E-14 | 2,37E-12 |
| TRINITY_DN33970_c0_g1_i1 | dmso | control | 2,48651159 | 1,15104571 | 3,88E-12 | 1,78E-10 |
| TRINITY_DN3935_c0_g1_i1  | dmso | control | 2,48608792 | 0,12119813 | 1,15E-07 | 2,53E-06 |
| TRINITY_DN7768_c0_g1_i1  | dmso | control | 2,47489413 | 3,81124567 | 2,18E-29 | 5,93E-27 |
| TRINITY_DN27739_c0_g1_i1 | dmso | control | 2,47460318 | 0,61175017 | 1,59E-09 | 4,80E-08 |
| TRINITY_DN11315_c0_g1_i1 | dmso | control | 2,43549278 | 5,69944504 | 8,03E-67 | 2,32E-63 |
| TRINITY_DN43484_c0_g1_i1 | dmso | control | 2,42957491 | -0,0690437 | 4,25E-07 | 8,14E-06 |
| TRINITY_DN24088_c0_g1_i1 | dmso | control | 2,42488824 | 1,55614863 | 2,57E-12 | 1,23E-10 |
| TRINITY_DN29453_c0_g1_i1 | dmso | control | 2,41577587 | -0,4088009 | 2,51E-06 | 4,01E-05 |
| TRINITY_DN9129_c0_g1_i1  | dmso | control | 2,41239622 | 1,04896673 | 1,40E-10 | 5,07E-09 |
| TRINITY_DN12755_c0_g1_i1 | dmso | control | 2,40999489 | 3,94718964 | 1,00E-22 | 1,49E-20 |
| TRINITY_DN22307_c0_g1_i1 | dmso | control | 2,40605989 | 1,32799968 | 3,15E-12 | 1,48E-10 |
| TRINITY_DN3473_c0_g1_i1  | dmso | control | 2,40134127 | 1,34588262 | 2,80E-12 | 1,33E-10 |
| TRINITY_DN26733_c0_g1_i1 | dmso | control | 2,39089409 | 1,05896212 | 2,02E-10 | 7,10E-09 |
| TRINITY_DN60644_c0_g1_i1 | dmso | control | 2,38091851 | -0,2041713 | 1,81E-06 | 2,99E-05 |
| TRINITY_DN13676_c0_g1_i1 | dmso | control | 2,37887239 | 1,9381353  | 2,24E-09 | 6,62E-08 |
| TRINITY_DN13233_c0_g1_i1 | dmso | control | 2,37378437 | 4,58514707 | 3,90E-31 | 1,17E-28 |
| TRINITY_DN41128_c0_g1_i1 | dmso | control | 2,37263153 | 0,7042469  | 6,37E-10 | 2,07E-08 |
| TRINITY_DN20952_c0_g1_i1 | dmso | control | 2,37009275 | 0,77980081 | 3,11E-09 | 8,86E-08 |
| TRINITY_DN33019_c0_g1_i1 | dmso | control | 2,36924951 | 6,33837051 | 9,33E-65 | 2,25E-61 |
| TRINITY_DN12013_c0_g1_i1 | dmso | control | 2,36006947 | 5,66322393 | 1,60E-37 | 7,72E-35 |
| TRINITY_DN19147_c0_g1_i1 | dmso | control | 2,35352995 | 3,30292256 | 5,11E-07 | 9,55E-06 |

|                          |      |         |            |            |          |            |
|--------------------------|------|---------|------------|------------|----------|------------|
| TRINITY_DN34826_c0_g1_i1 | dmso | control | 2,33417177 | 2,77646338 | 7,77E-21 | 9,75E-19   |
| TRINITY_DN14619_c0_g1_i1 | dmso | control | 2,32324772 | 1,66314398 | 1,55E-12 | 7,66E-11   |
| TRINITY_DN17802_c0_g1_i1 | dmso | control | 2,31292767 | -0,376998  | 3,79E-06 | 5,76E-05   |
| TRINITY_DN19662_c0_g1_i1 | dmso | control | 2,30818451 | 2,21873423 | 3,25E-16 | 2,60E-14   |
| TRINITY_DN30315_c0_g1_i1 | dmso | control | 2,30739183 | -0,2817127 | 2,58E-06 | 4,10E-05   |
| TRINITY_DN37332_c0_g1_i1 | dmso | control | 2,27876169 | 0,57075682 | 5,82E-08 | 1,35E-06   |
| TRINITY_DN1656_c0_g1_i1  | dmso | control | 2,27412438 | 5,38489097 | 2,50E-28 | 6,22E-26   |
| TRINITY_DN23818_c0_g1_i1 | dmso | control | 2,2721407  | 3,04854151 | 2,11E-23 | 3,28E-21   |
| TRINITY_DN15334_c0_g1_i1 | dmso | control | 2,26786021 | 0,71244686 | 4,76E-09 | 1,31E-07   |
| TRINITY_DN36204_c0_g1_i1 | dmso | control | 2,25477171 | 1,62262594 | 4,54E-10 | 1,50E-08   |
| TRINITY_DN2849_c0_g1_i1  | dmso | control | 2,23013533 | 3,30037565 | 4,60E-18 | 4,31E-16   |
| TRINITY_DN51975_c0_g1_i1 | dmso | control | 2,22894488 | 1,36968145 | 3,37E-09 | 9,53E-08   |
| TRINITY_DN19454_c0_g1_i1 | dmso | control | 2,20326866 | 0,16932722 | 2,39E-05 | 0,00029867 |
| TRINITY_DN4305_c0_g1_i1  | dmso | control | 2,19413666 | 0,04108324 | 1,95E-06 | 3,18E-05   |
| TRINITY_DN7774_c0_g1_i1  | dmso | control | 2,19265311 | 1,59629199 | 1,36E-11 | 5,80E-10   |
| TRINITY_DN25984_c0_g1_i1 | dmso | control | 2,19070373 | 2,86431228 | 1,47E-19 | 1,66E-17   |
| TRINITY_DN45070_c0_g1_i1 | dmso | control | 2,16194305 | 2,18508797 | 4,27E-15 | 2,95E-13   |
| TRINITY_DN25709_c0_g1_i1 | dmso | control | 2,15960175 | -0,1191399 | 7,22E-06 | 0,00010415 |
| TRINITY_DN2887_c0_g1_i1  | dmso | control | 2,14211142 | 2,69130465 | 8,29E-19 | 8,61E-17   |
| TRINITY_DN15183_c0_g1_i1 | dmso | control | 2,13762807 | 3,78320985 | 6,56E-22 | 9,02E-20   |
| TRINITY_DN8798_c0_g1_i1  | dmso | control | 2,13420423 | 0,5663384  | 5,94E-08 | 1,37E-06   |
| TRINITY_DN43825_c0_g1_i1 | dmso | control | 2,12304296 | 0,73332748 | 1,79E-08 | 4,49E-07   |
| TRINITY_DN643_c0_g1_i1   | dmso | control | 2,12266401 | 6,19580736 | 3,94E-09 | 1,10E-07   |
| TRINITY_DN17103_c0_g1_i1 | dmso | control | 2,10742167 | 4,81257535 | 3,40E-36 | 1,45E-33   |
| TRINITY_DN25898_c0_g1_i1 | dmso | control | 2,10557573 | 1,55753273 | 3,37E-08 | 8,03E-07   |
| TRINITY_DN45291_c0_g1_i1 | dmso | control | 2,10515602 | 1,22436785 | 2,89E-09 | 8,32E-08   |
| TRINITY_DN20432_c0_g1_i1 | dmso | control | 2,10441919 | 6,49429971 | 1,85E-24 | 3,23E-22   |
| TRINITY_DN20292_c0_g1_i1 | dmso | control | 2,09394891 | 2,88756482 | 4,03E-17 | 3,50E-15   |
| TRINITY_DN15687_c0_g1_i1 | dmso | control | 2,06652181 | 2,97423084 | 2,26E-11 | 9,29E-10   |
| TRINITY_DN15824_c0_g1_i1 | dmso | control | 2,05547821 | 0,74417957 | 6,20E-07 | 1,14E-05   |
| TRINITY_DN20090_c0_g1_i1 | dmso | control | 2,05430339 | 1,3936269  | 2,19E-08 | 5,41E-07   |

|                          |      |         |            |            |            |            |
|--------------------------|------|---------|------------|------------|------------|------------|
| TRINITY_DN6200_c0_g1_i1  | dmso | control | 2,04862947 | 4,56239209 | 3,13E-09   | 8,89E-08   |
| TRINITY_DN21833_c0_g1_i1 | dmso | control | 2,04628563 | 0,88528987 | 1,80E-06   | 2,98E-05   |
| TRINITY_DN20896_c0_g1_i1 | dmso | control | 2,04457925 | 1,96725427 | 9,18E-13   | 4,88E-11   |
| TRINITY_DN7782_c0_g1_i1  | dmso | control | 2,04225232 | 3,77797389 | 1,16E-14   | 7,70E-13   |
| TRINITY_DN32348_c0_g1_i1 | dmso | control | 2,04100098 | 3,04602984 | 1,05E-09   | 3,27E-08   |
| TRINITY_DN6357_c0_g1_i1  | dmso | control | 2,03997992 | 6,07370996 | 2,16E-58   | 2,40E-55   |
| TRINITY_DN42547_c0_g1_i1 | dmso | control | 2,03524433 | 1,30009062 | 4,92E-06   | 7,35E-05   |
| TRINITY_DN35429_c0_g1_i1 | dmso | control | 2,02180884 | 0,01206838 | 1,02E-05   | 0,00014289 |
| TRINITY_DN3648_c0_g1_i1  | dmso | control | 2,02060041 | 2,36930137 | 4,40E-12   | 2,00E-10   |
| TRINITY_DN19691_c0_g1_i1 | dmso | control | 2,01898175 | 0,70905392 | 7,52E-05   | 0,00082007 |
| TRINITY_DN14084_c0_g1_i1 | dmso | control | 2,01224931 | 3,82207164 | 1,47E-16   | 1,20E-14   |
| TRINITY_DN33258_c0_g1_i1 | dmso | control | 2,01119621 | 3,66818799 | 1,10E-22   | 1,61E-20   |
| TRINITY_DN1182_c0_g1_i1  | dmso | control | 2,0034369  | 1,77988824 | 3,82E-11   | 1,51E-09   |
| TRINITY_DN13928_c0_g1_i1 | dmso | control | 1,99695338 | 2,17238232 | 3,38E-10   | 1,15E-08   |
| TRINITY_DN2132_c0_g1_i1  | dmso | control | 1,99201193 | 3,9121807  | 1,80E-10   | 6,35E-09   |
| TRINITY_DN48528_c0_g1_i1 | dmso | control | 1,98934011 | -0,3455519 | 3,46E-05   | 0,00041463 |
| TRINITY_DN15154_c0_g1_i1 | dmso | control | 1,98316479 | 2,82479183 | 3,30E-15   | 2,32E-13   |
| TRINITY_DN4469_c0_g1_i1  | dmso | control | 1,98121548 | 1,45860375 | 0,00019062 | 0,00180914 |
| TRINITY_DN37203_c0_g1_i1 | dmso | control | 1,97490593 | -0,4234368 | 4,19E-05   | 0,00049045 |
| TRINITY_DN34140_c0_g1_i1 | dmso | control | 1,97348695 | 0,10870849 | 8,67E-06   | 0,00012238 |
| TRINITY_DN34978_c0_g1_i1 | dmso | control | 1,96889761 | 0,78174832 | 1,84E-07   | 3,85E-06   |
| TRINITY_DN24207_c0_g1_i1 | dmso | control | 1,96379386 | 2,42369915 | 3,08E-11   | 1,23E-09   |
| TRINITY_DN49208_c0_g1_i1 | dmso | control | 1,95199417 | -0,1928089 | 1,93E-05   | 0,00024828 |
| TRINITY_DN24866_c0_g1_i1 | dmso | control | 1,93548555 | 0,07150248 | 1,14E-05   | 0,000158   |
| TRINITY_DN24304_c0_g1_i1 | dmso | control | 1,93152755 | 1,07622454 | 1,42E-06   | 2,42E-05   |
| TRINITY_DN42477_c0_g1_i1 | dmso | control | 1,92805976 | 1,73565379 | 5,13E-11   | 1,97E-09   |
| TRINITY_DN23881_c0_g1_i1 | dmso | control | 1,9278007  | 3,6765304  | 9,51E-21   | 1,18E-18   |
| TRINITY_DN2168_c0_g1_i1  | dmso | control | 1,92468715 | 4,53143292 | 2,74E-09   | 7,98E-08   |
| TRINITY_DN42014_c0_g1_i1 | dmso | control | 1,9238329  | 0,79181301 | 2,97E-07   | 5,87E-06   |
| TRINITY_DN59535_c0_g1_i1 | dmso | control | 1,90345672 | -0,2381455 | 5,51E-05   | 0,00062577 |
| TRINITY_DN26141_c0_g1_i1 | dmso | control | 1,90154699 | 0,76506212 | 2,35E-07   | 4,76E-06   |

|                          |      |         |            |            |            |            |
|--------------------------|------|---------|------------|------------|------------|------------|
| TRINITY_DN27690_c0_g1_i1 | dmso | control | 1,89810672 | 1,52577441 | 1,89E-07   | 3,94E-06   |
| TRINITY_DN8508_c0_g1_i1  | dmso | control | 1,8966663  | 2,52615372 | 3,56E-10   | 1,20E-08   |
| TRINITY_DN23634_c0_g1_i1 | dmso | control | 1,88178113 | 0,74784371 | 4,34E-07   | 8,28E-06   |
| TRINITY_DN37515_c0_g1_i1 | dmso | control | 1,86884712 | 1,2622122  | 3,73E-06   | 5,69E-05   |
| TRINITY_DN5732_c0_g1_i1  | dmso | control | 1,86699681 | 3,62608598 | 4,23E-12   | 1,93E-10   |
| TRINITY_DN13564_c0_g1_i1 | dmso | control | 1,85464331 | 2,70426601 | 3,63E-12   | 1,68E-10   |
| TRINITY_DN23156_c0_g1_i1 | dmso | control | 1,84471021 | 2,82176103 | 6,58E-14   | 3,96E-12   |
| TRINITY_DN3872_c0_g1_i1  | dmso | control | 1,84430166 | 4,89136094 | 5,13E-21   | 6,56E-19   |
| TRINITY_DN20769_c0_g1_i1 | dmso | control | 1,84325512 | 2,09339268 | 5,06E-11   | 1,95E-09   |
| TRINITY_DN2550_c0_g1_i1  | dmso | control | 1,84102246 | 3,81518217 | 3,97E-22   | 5,52E-20   |
| TRINITY_DN19802_c0_g1_i1 | dmso | control | 1,84048483 | 3,74105053 | 2,19E-19   | 2,40E-17   |
| TRINITY_DN14516_c0_g1_i1 | dmso | control | 1,83932551 | 3,07764241 | 1,59E-14   | 1,04E-12   |
| TRINITY_DN41630_c0_g1_i1 | dmso | control | 1,83787315 | 0,20338588 | 0,00010203 | 0,00106315 |
| TRINITY_DN12964_c0_g1_i1 | dmso | control | 1,83148368 | 3,89146564 | 1,22E-15   | 8,97E-14   |
| TRINITY_DN7136_c0_g1_i1  | dmso | control | 1,83030234 | 2,99388987 | 6,12E-16   | 4,78E-14   |
| TRINITY_DN32174_c0_g1_i1 | dmso | control | 1,82576747 | -0,2610069 | 0,00021805 | 0,00202681 |
| TRINITY_DN19388_c0_g1_i1 | dmso | control | 1,82214104 | 2,54370316 | 1,25E-12   | 6,47E-11   |
| TRINITY_DN22249_c0_g1_i1 | dmso | control | 1,81674726 | 0,35435078 | 5,75E-05   | 0,0006513  |
| TRINITY_DN32817_c0_g1_i1 | dmso | control | 1,8079575  | 2,13797327 | 7,97E-11   | 2,98E-09   |
| TRINITY_DN15279_c0_g1_i1 | dmso | control | 1,7995688  | 2,25588453 | 7,23E-12   | 3,21E-10   |
| TRINITY_DN43533_c0_g1_i1 | dmso | control | 1,79150906 | 0,38855212 | 6,40E-06   | 9,34E-05   |
| TRINITY_DN42403_c0_g1_i1 | dmso | control | 1,78609835 | 0,41554011 | 2,78E-05   | 0,00034203 |
| TRINITY_DN41921_c0_g1_i1 | dmso | control | 1,78559809 | 0,26073606 | 0,00026296 | 0,00238734 |
| TRINITY_DN36956_c0_g1_i1 | dmso | control | 1,78532307 | 0,1715158  | 3,92E-05   | 0,00046341 |
| TRINITY_DN3363_c0_g1_i1  | dmso | control | 1,78246009 | 1,30152681 | 1,28E-06   | 2,18E-05   |
| TRINITY_DN49125_c0_g1_i1 | dmso | control | 1,78131325 | 0,57284576 | 2,94E-05   | 0,00035831 |
| TRINITY_DN32912_c0_g1_i1 | dmso | control | 1,77733902 | 3,46422705 | 2,60E-12   | 1,24E-10   |
| TRINITY_DN63705_c0_g1_i1 | dmso | control | 1,77604951 | 0,07566521 | 0,00019349 | 0,00183352 |
| TRINITY_DN9481_c0_g1_i1  | dmso | control | 1,77512851 | -0,1927107 | 0,00012304 | 0,00124902 |
| TRINITY_DN32468_c0_g1_i1 | dmso | control | 1,77416681 | 2,28337968 | 1,48E-07   | 3,16E-06   |
| TRINITY_DN12336_c0_g1_i1 | dmso | control | 1,77287855 | 3,98787719 | 1,30E-18   | 1,30E-16   |

|                          |      |         |            |            |            |            |
|--------------------------|------|---------|------------|------------|------------|------------|
| TRINITY_DN13682_c0_g1_i1 | dmso | control | 1,76393277 | 4,68398303 | 1,43E-27   | 3,17E-25   |
| TRINITY_DN19621_c0_g1_i1 | dmso | control | 1,76319993 | 2,42814762 | 5,43E-05   | 0,00061797 |
| TRINITY_DN17591_c0_g1_i1 | dmso | control | 1,75874274 | 0,53931287 | 4,61E-05   | 0,00053346 |
| TRINITY_DN14987_c0_g1_i1 | dmso | control | 1,75153836 | 2,14418955 | 1,95E-10   | 6,84E-09   |
| TRINITY_DN1313_c0_g1_i1  | dmso | control | 1,74669016 | 4,26519799 | 2,21E-21   | 2,91E-19   |
| TRINITY_DN28963_c0_g1_i1 | dmso | control | 1,74042746 | 0,73161127 | 1,92E-06   | 3,15E-05   |
| TRINITY_DN5094_c0_g1_i1  | dmso | control | 1,73975646 | 4,85528373 | 5,53E-29   | 1,43E-26   |
| TRINITY_DN11781_c0_g1_i1 | dmso | control | 1,73903121 | 4,73527466 | 1,38E-26   | 2,80E-24   |
| TRINITY_DN3043_c0_g1_i1  | dmso | control | 1,73689988 | 4,37331248 | 9,38E-09   | 2,49E-07   |
| TRINITY_DN25687_c0_g1_i1 | dmso | control | 1,73388843 | 0,86517108 | 1,21E-05   | 0,00016696 |
| TRINITY_DN2802_c0_g1_i1  | dmso | control | 1,73102909 | 4,27998161 | 2,42E-21   | 3,14E-19   |
| TRINITY_DN10854_c0_g1_i1 | dmso | control | 1,72991233 | 6,4349028  | 6,65E-36   | 2,67E-33   |
| TRINITY_DN15081_c0_g1_i1 | dmso | control | 1,7282076  | 2,02746342 | 2,59E-09   | 7,61E-08   |
| TRINITY_DN11126_c0_g1_i1 | dmso | control | 1,72819267 | 3,90056263 | 8,37E-19   | 8,64E-17   |
| TRINITY_DN14029_c0_g1_i1 | dmso | control | 1,72783766 | 1,84799845 | 2,46E-09   | 7,26E-08   |
| TRINITY_DN17088_c0_g1_i1 | dmso | control | 1,72226543 | 0,91413342 | 0,00033051 | 0,00292001 |
| TRINITY_DN12344_c0_g1_i1 | dmso | control | 1,72192644 | 3,18953841 | 7,28E-15   | 4,98E-13   |
| TRINITY_DN17302_c0_g1_i1 | dmso | control | 1,71694074 | 0,85290703 | 9,78E-07   | 1,71E-05   |
| TRINITY_DN22752_c0_g1_i1 | dmso | control | 1,71522386 | 1,62947126 | 6,89E-09   | 1,86E-07   |
| TRINITY_DN16748_c0_g1_i1 | dmso | control | 1,71355392 | 2,20395261 | 1,48E-10   | 5,32E-09   |
| TRINITY_DN12123_c0_g1_i1 | dmso | control | 1,71084599 | 3,80995665 | 1,94E-18   | 1,89E-16   |
| TRINITY_DN13576_c0_g1_i1 | dmso | control | 1,71022786 | 1,52631408 | 7,61E-07   | 1,37E-05   |
| TRINITY_DN1492_c0_g1_i1  | dmso | control | 1,70008388 | 7,7969178  | 4,17E-38   | 2,08E-35   |
| TRINITY_DN6396_c0_g1_i1  | dmso | control | 1,69992495 | 3,14625557 | 2,73E-11   | 1,10E-09   |
| TRINITY_DN349_c0_g1_i1   | dmso | control | 1,6968641  | 6,29562263 | 1,61E-17   | 1,45E-15   |
| TRINITY_DN11835_c0_g1_i1 | dmso | control | 1,69600953 | 3,37188751 | 4,36E-13   | 2,37E-11   |
| TRINITY_DN13043_c0_g1_i1 | dmso | control | 1,69412852 | 3,24370636 | 4,61E-14   | 2,81E-12   |
| TRINITY_DN2953_c0_g1_i1  | dmso | control | 1,69344438 | 1,68408639 | 2,64E-08   | 6,41E-07   |
| TRINITY_DN30327_c0_g1_i1 | dmso | control | 1,68731881 | -0,1030556 | 0,000238   | 0,00218977 |
| TRINITY_DN28942_c0_g1_i1 | dmso | control | 1,68588581 | 0,00793236 | 0,00012738 | 0,00128315 |
| TRINITY_DN60799_c0_g1_i1 | dmso | control | 1,68381381 | -0,2516115 | 0,000257   | 0,00234072 |



|                          |      |         |            |            |            |            |
|--------------------------|------|---------|------------|------------|------------|------------|
| TRINITY_DN28060_c0_g1_i1 | dmso | control | 1,67562324 | -0,0167262 | 0,00016666 | 0,00161244 |
| TRINITY_DN40777_c0_g1_i1 | dmso | control | 1,6738833  | 0,06013969 | 8,21E-05   | 0,00088093 |
| TRINITY_DN12428_c0_g1_i1 | dmso | control | 1,67039912 | 3,51982115 | 2,46E-13   | 1,39E-11   |
| TRINITY_DN21813_c0_g1_i1 | dmso | control | 1,66937221 | 3,8552871  | 7,71E-16   | 5,89E-14   |
| TRINITY_DN8410_c0_g1_i1  | dmso | control | 1,6645799  | -0,0498768 | 0,00017072 | 0,00164736 |
| TRINITY_DN44412_c0_g1_i1 | dmso | control | 1,66225604 | 0,39575672 | 9,37E-05   | 0,00099009 |
| TRINITY_DN12904_c0_g1_i1 | dmso | control | 1,66102502 | 3,25579408 | 1,12E-13   | 6,53E-12   |
| TRINITY_DN39817_c0_g1_i1 | dmso | control | 1,65217641 | 1,61495833 | 0,00059004 | 0,00476149 |
| TRINITY_DN35358_c0_g1_i1 | dmso | control | 1,64991753 | 0,98455884 | 1,77E-05   | 0,00023072 |
| TRINITY_DN33134_c0_g1_i1 | dmso | control | 1,64723202 | 3,4289179  | 7,38E-16   | 5,67E-14   |
| TRINITY_DN3343_c0_g1_i1  | dmso | control | 1,64310842 | 4,17043582 | 3,18E-13   | 1,77E-11   |
| TRINITY_DN27795_c0_g1_i1 | dmso | control | 1,64203393 | 2,8464505  | 4,55E-12   | 2,06E-10   |
| TRINITY_DN9184_c0_g1_i1  | dmso | control | 1,64013721 | 3,77629443 | 2,25E-15   | 1,59E-13   |
| TRINITY_DN8611_c0_g1_i1  | dmso | control | 1,63806345 | 1,48382116 | 1,35E-07   | 2,92E-06   |
| TRINITY_DN55625_c0_g1_i1 | dmso | control | 1,63686152 | -0,0123738 | 0,000181   | 0,00173145 |
| TRINITY_DN40948_c0_g1_i1 | dmso | control | 1,63411505 | 0,3596979  | 2,97E-05   | 0,00036113 |
| TRINITY_DN9565_c0_g1_i1  | dmso | control | 1,63289265 | 1,06577909 | 0,00602458 | 0,03123654 |
| TRINITY_DN32511_c0_g1_i1 | dmso | control | 1,63015586 | 3,93600614 | 1,30E-10   | 4,72E-09   |
| TRINITY_DN22383_c0_g1_i1 | dmso | control | 1,62703207 | 3,65514895 | 1,63E-08   | 4,13E-07   |
| TRINITY_DN4685_c0_g1_i1  | dmso | control | 1,61839936 | 7,07563474 | 4,47E-39   | 2,31E-36   |
| TRINITY_DN25584_c0_g1_i1 | dmso | control | 1,61839734 | 2,38368145 | 1,24E-09   | 3,80E-08   |
| TRINITY_DN22598_c0_g1_i1 | dmso | control | 1,61397991 | 1,23176451 | 1,72E-05   | 0,00022475 |
| TRINITY_DN24214_c0_g1_i1 | dmso | control | 1,60617643 | 2,52032193 | 2,91E-10   | 1,00E-08   |
| TRINITY_DN11191_c0_g1_i1 | dmso | control | 1,6030225  | 5,133323   | 4,51E-20   | 5,30E-18   |
| TRINITY_DN19830_c0_g1_i1 | dmso | control | 1,59849287 | 2,30227301 | 1,54E-09   | 4,66E-08   |
| TRINITY_DN30519_c0_g1_i1 | dmso | control | 1,59822896 | -0,2523006 | 0,00065549 | 0,00521968 |
| TRINITY_DN34339_c0_g1_i1 | dmso | control | 1,58658634 | 0,70143091 | 3,14E-05   | 0,00038132 |
| TRINITY_DN23017_c0_g1_i1 | dmso | control | 1,58627512 | 0,50612664 | 7,48E-05   | 0,00081683 |
| TRINITY_DN6849_c0_g1_i1  | dmso | control | 1,58621258 | 4,24499203 | 9,11E-20   | 1,05E-17   |
| TRINITY_DN7831_c0_g1_i1  | dmso | control | 1,58606053 | 2,48906235 | 2,91E-10   | 1,00E-08   |
| TRINITY_DN5269_c0_g1_i1  | dmso | control | 1,58314437 | 5,72381585 | 5,15E-24   | 8,64E-22   |

|                          |      |         |            |            |            |            |
|--------------------------|------|---------|------------|------------|------------|------------|
| TRINITY_DN10160_c0_g1_i1 | dmso | control | 1,58279331 | -0,1895464 | 0,00037973 | 0,00327277 |
| TRINITY_DN25087_c0_g1_i1 | dmso | control | 1,58063607 | 3,34959018 | 1,32E-14   | 8,73E-13   |
| TRINITY_DN12195_c0_g1_i1 | dmso | control | 1,57927592 | 2,59357682 | 4,45E-09   | 1,24E-07   |
| TRINITY_DN27022_c0_g1_i1 | dmso | control | 1,57903848 | 3,14751204 | 8,94E-14   | 5,25E-12   |
| TRINITY_DN27626_c0_g1_i1 | dmso | control | 1,5759709  | 1,29179574 | 1,93E-06   | 3,16E-05   |
| TRINITY_DN22943_c0_g1_i1 | dmso | control | 1,57069082 | 2,9493184  | 2,19E-11   | 9,05E-10   |
| TRINITY_DN9308_c0_g1_i1  | dmso | control | 1,56451365 | 1,9147704  | 5,14E-08   | 1,19E-06   |
| TRINITY_DN562_c0_g1_i1   | dmso | control | 1,56127343 | 6,27116174 | 4,06E-26   | 7,72E-24   |
| TRINITY_DN24653_c0_g1_i1 | dmso | control | 1,55677124 | 2,33553652 | 1,90E-09   | 5,68E-08   |
| TRINITY_DN7900_c0_g1_i1  | dmso | control | 1,55634803 | 1,2194705  | 4,23E-05   | 0,00049422 |
| TRINITY_DN47973_c0_g1_i1 | dmso | control | 1,54506365 | 0,01301378 | 0,00060918 | 0,00489874 |
| TRINITY_DN6643_c0_g1_i1  | dmso | control | 1,54451542 | 4,01396049 | 8,27E-16   | 6,26E-14   |
| TRINITY_DN20401_c0_g1_i1 | dmso | control | 1,5419703  | 0,93661774 | 2,15E-05   | 0,00027245 |
| TRINITY_DN19664_c0_g1_i1 | dmso | control | 1,54104903 | 4,63032619 | 2,22E-07   | 4,52E-06   |
| TRINITY_DN826_c0_g1_i1   | dmso | control | 1,53719147 | 7,82886013 | 1,76E-23   | 2,79E-21   |
| TRINITY_DN6269_c0_g1_i1  | dmso | control | 1,53139468 | 5,91656983 | 3,51E-31   | 1,08E-28   |
| TRINITY_DN3582_c0_g1_i1  | dmso | control | 1,52752208 | 2,8149451  | 3,10E-11   | 1,23E-09   |
| TRINITY_DN2721_c0_g1_i1  | dmso | control | 1,52734178 | 5,30726378 | 1,79E-18   | 1,76E-16   |
| TRINITY_DN615_c0_g1_i1   | dmso | control | 1,52601114 | 5,82998922 | 6,39E-28   | 1,54E-25   |
| TRINITY_DN27439_c0_g1_i1 | dmso | control | 1,52437246 | 1,37447334 | 3,06E-06   | 4,76E-05   |
| TRINITY_DN7961_c0_g1_i1  | dmso | control | 1,5241341  | 2,41897465 | 2,64E-07   | 5,30E-06   |
| TRINITY_DN35505_c0_g1_i1 | dmso | control | 1,52280112 | 0,73606418 | 3,30E-05   | 0,00039704 |
| TRINITY_DN8889_c0_g1_i1  | dmso | control | 1,51894348 | 0,84056095 | 2,99E-05   | 0,00036421 |
| TRINITY_DN13740_c0_g1_i1 | dmso | control | 1,51767845 | 3,86045791 | 7,20E-16   | 5,56E-14   |
| TRINITY_DN3039_c0_g1_i1  | dmso | control | 1,51718279 | 3,52400722 | 3,84E-13   | 2,11E-11   |
| TRINITY_DN3649_c0_g1_i1  | dmso | control | 1,51605279 | 4,7723785  | 2,20E-20   | 2,69E-18   |
| TRINITY_DN9976_c0_g1_i1  | dmso | control | 1,51536995 | 1,04292206 | 0,01357277 | 0,05891187 |
| TRINITY_DN33105_c0_g1_i1 | dmso | control | 1,51318143 | 1,04783199 | 6,00E-06   | 8,80E-05   |
| TRINITY_DN6060_c0_g1_i1  | dmso | control | 1,51102119 | 5,2896518  | 3,21E-26   | 6,36E-24   |
| TRINITY_DN9398_c0_g1_i1  | dmso | control | 1,50784485 | 2,50185166 | 8,54E-10   | 2,72E-08   |
| TRINITY_DN23062_c0_g1_i1 | dmso | control | 1,50639223 | 3,81425462 | 7,21E-15   | 4,96E-13   |

|                          |      |         |            |            |            |            |
|--------------------------|------|---------|------------|------------|------------|------------|
| TRINITY_DN5078_c0_g1_i1  | dmso | control | 1,50505773 | 7,06917029 | 5,60E-33   | 1,93E-30   |
| TRINITY_DN13466_c0_g1_i1 | dmso | control | 1,50426021 | 2,16723612 | 4,32E-08   | 1,02E-06   |
| TRINITY_DN3569_c0_g1_i1  | dmso | control | 1,50418885 | 2,48491289 | 8,81E-10   | 2,79E-08   |
| TRINITY_DN49595_c0_g1_i1 | dmso | control | 1,50372287 | 0,09535876 | 0,00029891 | 0,00267684 |
| TRINITY_DN23576_c0_g1_i1 | dmso | control | 1,50363731 | 1,65151155 | 5,73E-07   | 1,06E-05   |
| TRINITY_DN1717_c0_g1_i1  | dmso | control | 1,50213824 | 3,67590623 | 4,51E-10   | 1,49E-08   |
| TRINITY_DN922_c0_g1_i1   | dmso | control | 1,50185559 | 10,3499376 | 8,76E-45   | 6,03E-42   |
| TRINITY_DN1427_c0_g1_i1  | dmso | control | 1,50182942 | 3,21250267 | 5,01E-09   | 1,37E-07   |
| TRINITY_DN21652_c0_g1_i1 | dmso | control | 1,4972815  | 1,6236403  | 4,70E-07   | 8,86E-06   |
| TRINITY_DN12376_c0_g1_i1 | dmso | control | 1,49725267 | 4,20578158 | 2,97E-17   | 2,60E-15   |
| TRINITY_DN21960_c0_g1_i1 | dmso | control | 1,49640674 | 1,82529067 | 6,08E-07   | 1,12E-05   |
| TRINITY_DN36905_c0_g1_i1 | dmso | control | 1,49445413 | 0,13272878 | 0,00042024 | 0,00356452 |
| TRINITY_DN30586_c0_g1_i1 | dmso | control | 1,49284666 | -0,0666684 | 0,00073445 | 0,00573153 |
| TRINITY_DN20888_c0_g1_i1 | dmso | control | 1,49143373 | 2,78249232 | 1,17E-10   | 4,29E-09   |
| TRINITY_DN6980_c0_g1_i1  | dmso | control | 1,48638612 | 3,25737874 | 4,03E-10   | 1,34E-08   |
| TRINITY_DN30308_c0_g1_i1 | dmso | control | 1,48621818 | 2,27154757 | 1,09E-08   | 2,88E-07   |
| TRINITY_DN19130_c0_g1_i1 | dmso | control | 1,4852049  | 3,36911625 | 5,65E-13   | 3,05E-11   |
| TRINITY_DN12484_c0_g1_i1 | dmso | control | 1,48360759 | 4,72170363 | 8,29E-12   | 3,64E-10   |
| TRINITY_DN38192_c0_g1_i1 | dmso | control | 1,48104157 | 4,24632847 | 1,62E-17   | 1,45E-15   |
| TRINITY_DN22067_c0_g1_i1 | dmso | control | 1,48081733 | 1,60907774 | 1,80E-06   | 2,98E-05   |
| TRINITY_DN6877_c0_g1_i1  | dmso | control | 1,48002626 | 2,82539379 | 4,32E-11   | 1,69E-09   |
| TRINITY_DN23151_c0_g1_i1 | dmso | control | 1,47072029 | -0,1469406 | 0,00064083 | 0,00512274 |
| TRINITY_DN13300_c0_g1_i1 | dmso | control | 1,47047741 | 2,80758955 | 5,36E-09   | 1,46E-07   |
| TRINITY_DN24400_c0_g1_i1 | dmso | control | 1,46877097 | 1,39293916 | 0,00010548 | 0,00109463 |
| TRINITY_DN35071_c0_g1_i1 | dmso | control | 1,46790046 | 0,60945284 | 0,00013843 | 0,00138285 |
| TRINITY_DN50209_c0_g1_i1 | dmso | control | 1,46768455 | 0,22714729 | 0,00133629 | 0,00944359 |
| TRINITY_DN41736_c0_g1_i1 | dmso | control | 1,46668083 | 1,70255288 | 3,71E-07   | 7,16E-06   |
| TRINITY_DN17930_c0_g1_i1 | dmso | control | 1,46560429 | 0,20030389 | 0,00060942 | 0,00489874 |
| TRINITY_DN6394_c0_g1_i1  | dmso | control | 1,46466616 | 3,11125673 | 7,60E-11   | 2,85E-09   |
| TRINITY_DN31951_c0_g1_i1 | dmso | control | 1,46402273 | 2,53716787 | 1,07E-09   | 3,33E-08   |
| TRINITY_DN8557_c0_g1_i1  | dmso | control | 1,46322893 | 0,78120904 | 0,00043069 | 0,00364247 |

|                          |      |         |            |            |            |            |
|--------------------------|------|---------|------------|------------|------------|------------|
| TRINITY_DN13187_c0_g1_i1 | dmso | control | 1,46297552 | 3,92376841 | 9,55E-16   | 7,08E-14   |
| TRINITY_DN23093_c0_g1_i1 | dmso | control | 1,46094125 | 4,33841699 | 1,34E-16   | 1,10E-14   |
| TRINITY_DN22968_c0_g1_i1 | dmso | control | 1,45536692 | 3,18525402 | 1,44E-10   | 5,17E-09   |
| TRINITY_DN9091_c0_g1_i1  | dmso | control | 1,45525849 | 0,4554617  | 0,00080972 | 0,00622568 |
| TRINITY_DN30628_c0_g1_i1 | dmso | control | 1,44856598 | 2,89955886 | 1,03E-10   | 3,85E-09   |
| TRINITY_DN14980_c0_g1_i1 | dmso | control | 1,4445473  | 2,66505669 | 2,92E-09   | 8,38E-08   |
| TRINITY_DN27008_c0_g1_i1 | dmso | control | 1,44209861 | 2,29782105 | 4,38E-07   | 8,34E-06   |
| TRINITY_DN21756_c0_g1_i1 | dmso | control | 1,44012967 | 3,11246128 | 7,36E-08   | 1,67E-06   |
| TRINITY_DN36818_c0_g1_i1 | dmso | control | 1,43808988 | 2,01814065 | 8,23E-05   | 0,0008821  |
| TRINITY_DN11040_c0_g1_i1 | dmso | control | 1,43786132 | 4,93067099 | 7,26E-14   | 4,35E-12   |
| TRINITY_DN11101_c0_g1_i1 | dmso | control | 1,43779737 | 5,81830283 | 2,44E-22   | 3,45E-20   |
| TRINITY_DN24119_c0_g1_i1 | dmso | control | 1,42910903 | 0,52092931 | 0,00061777 | 0,00495276 |
| TRINITY_DN19990_c0_g1_i1 | dmso | control | 1,42805591 | 7,35393137 | 1,12E-28   | 2,83E-26   |
| TRINITY_DN22423_c0_g1_i1 | dmso | control | 1,4257083  | 1,43653645 | 1,17E-05   | 0,00016206 |
| TRINITY_DN12548_c0_g1_i1 | dmso | control | 1,42408304 | 2,97883651 | 6,86E-11   | 2,60E-09   |
| TRINITY_DN21137_c0_g1_i1 | dmso | control | 1,42298979 | 2,08514356 | 1,50E-07   | 3,19E-06   |
| TRINITY_DN27712_c0_g1_i1 | dmso | control | 1,42254134 | -0,3126184 | 0,00281329 | 0,01717581 |
| TRINITY_DN33643_c0_g1_i1 | dmso | control | 1,42076888 | 1,45750282 | 3,24E-06   | 5,01E-05   |
| TRINITY_DN2880_c0_g1_i1  | dmso | control | 1,41843292 | 5,793832   | 3,29E-24   | 5,59E-22   |
| TRINITY_DN13879_c0_g1_i1 | dmso | control | 1,4171526  | 1,40594469 | 1,21E-05   | 0,00016659 |
| TRINITY_DN28225_c0_g1_i1 | dmso | control | 1,41668991 | 0,17485555 | 0,00058762 | 0,0047474  |
| TRINITY_DN34421_c0_g1_i1 | dmso | control | 1,41530359 | 1,41735047 | 5,11E-06   | 7,62E-05   |
| TRINITY_DN9439_c0_g1_i1  | dmso | control | 1,40947565 | 1,84910032 | 5,38E-06   | 7,96E-05   |
| TRINITY_DN22182_c0_g1_i1 | dmso | control | 1,40927895 | 1,99585307 | 1,54E-07   | 3,28E-06   |
| TRINITY_DN24909_c0_g1_i1 | dmso | control | 1,40472051 | 0,59975009 | 0,00031914 | 0,00283434 |
| TRINITY_DN2075_c0_g1_i1  | dmso | control | 1,40077849 | 2,10377441 | 8,94E-07   | 1,58E-05   |
| TRINITY_DN2124_c0_g1_i1  | dmso | control | 1,39426553 | 3,80185659 | 4,14E-07   | 7,94E-06   |
| TRINITY_DN26440_c0_g1_i1 | dmso | control | 1,39424167 | 0,98862496 | 3,51E-05   | 0,00042041 |
| TRINITY_DN1464_c0_g1_i1  | dmso | control | 1,39412626 | 7,83109891 | 4,22E-34   | 1,56E-31   |
| TRINITY_DN2377_c0_g1_i1  | dmso | control | 1,39255834 | 5,55210156 | 1,47E-11   | 6,24E-10   |
| TRINITY_DN3951_c0_g1_i1  | dmso | control | 1,38903565 | 3,45749814 | 6,36E-12   | 2,83E-10   |

|                          |      |         |            |            |            |            |
|--------------------------|------|---------|------------|------------|------------|------------|
| TRINITY_DN36717_c0_g1_i1 | dmso | control | 1,38730931 | 1,71845512 | 5,24E-06   | 7,79E-05   |
| TRINITY_DN33961_c0_g1_i1 | dmso | control | 1,38654759 | 1,07085117 | 3,28E-05   | 0,00039452 |
| TRINITY_DN17520_c0_g1_i1 | dmso | control | 1,38500342 | 1,38857177 | 3,60E-05   | 0,00042971 |
| TRINITY_DN4732_c0_g1_i1  | dmso | control | 1,38435141 | 3,60438525 | 9,65E-11   | 3,60E-09   |
| TRINITY_DN14845_c0_g1_i1 | dmso | control | 1,38096028 | 3,90575046 | 9,36E-13   | 4,93E-11   |
| TRINITY_DN2708_c0_g1_i1  | dmso | control | 1,38059049 | 2,67949163 | 4,51E-08   | 1,06E-06   |
| TRINITY_DN24832_c0_g1_i1 | dmso | control | 1,37966261 | 2,55428018 | 1,84E-07   | 3,85E-06   |
| TRINITY_DN37404_c0_g1_i1 | dmso | control | 1,37953848 | 0,09349816 | 0,00079408 | 0,00612481 |
| TRINITY_DN11954_c0_g1_i1 | dmso | control | 1,37943397 | 2,39919197 | 3,25E-06   | 5,03E-05   |
| TRINITY_DN15312_c0_g1_i1 | dmso | control | 1,37825997 | 0,88550207 | 0,00012909 | 0,00129945 |
| TRINITY_DN4632_c0_g1_i1  | dmso | control | 1,37809855 | 5,72023878 | 8,02E-17   | 6,77E-15   |
| TRINITY_DN37431_c0_g1_i1 | dmso | control | 1,371032   | 0,68771913 | 0,00016875 | 0,00163162 |
| TRINITY_DN3113_c0_g1_i1  | dmso | control | 1,36856064 | 5,25756184 | 2,63E-18   | 2,51E-16   |
| TRINITY_DN3128_c0_g1_i1  | dmso | control | 1,36802697 | 4,01059329 | 7,95E-12   | 3,51E-10   |
| TRINITY_DN7258_c0_g1_i1  | dmso | control | 1,36571013 | 2,62628776 | 1,10E-06   | 1,90E-05   |
| TRINITY_DN9677_c0_g1_i1  | dmso | control | 1,36440765 | 0,8460415  | 0,0013506  | 0,00952612 |
| TRINITY_DN10583_c0_g1_i1 | dmso | control | 1,3625894  | 1,11375022 | 0,00025285 | 0,00231019 |
| TRINITY_DN16695_c0_g1_i1 | dmso | control | 1,36206863 | 1,85080239 | 1,07E-05   | 0,00014921 |
| TRINITY_DN9977_c0_g1_i1  | dmso | control | 1,36193629 | 0,68819122 | 0,00012711 | 0,00128218 |
| TRINITY_DN9518_c0_g1_i1  | dmso | control | 1,35905473 | 1,85219038 | 4,77E-06   | 7,15E-05   |
| TRINITY_DN6124_c0_g1_i1  | dmso | control | 1,3578855  | 5,28990741 | 2,06E-20   | 2,55E-18   |
| TRINITY_DN3834_c0_g1_i1  | dmso | control | 1,3536886  | 0,91369479 | 0,00011445 | 0,00117414 |
| TRINITY_DN19407_c0_g1_i1 | dmso | control | 1,35206718 | 4,84676142 | 2,12E-10   | 7,38E-09   |
| TRINITY_DN7953_c0_g1_i1  | dmso | control | 1,34877578 | 7,18740381 | 1,01E-27   | 2,36E-25   |
| TRINITY_DN22523_c0_g1_i1 | dmso | control | 1,34754292 | 0,16867917 | 0,00144136 | 0,01004173 |
| TRINITY_DN11220_c0_g1_i1 | dmso | control | 1,34332774 | 4,39347556 | 1,06E-12   | 5,49E-11   |
| TRINITY_DN14304_c0_g1_i1 | dmso | control | 1,3431381  | 2,62880465 | 1,73E-06   | 2,88E-05   |
| TRINITY_DN38474_c0_g1_i1 | dmso | control | 1,33949125 | 0,08760238 | 0,00177534 | 0,01190116 |
| TRINITY_DN8965_c0_g1_i1  | dmso | control | 1,33805389 | 2,02730063 | 3,26E-05   | 0,000393   |
| TRINITY_DN37494_c0_g1_i1 | dmso | control | 1,33661186 | 2,48100554 | 2,10E-07   | 4,30E-06   |
| TRINITY_DN9427_c0_g1_i1  | dmso | control | 1,33328751 | 4,54435553 | 9,10E-17   | 7,60E-15   |

|                          |      |         |            |            |            |            |
|--------------------------|------|---------|------------|------------|------------|------------|
| TRINITY_DN22536_c0_g1_i1 | dmso | control | 1,3330922  | 1,1607189  | 6,95E-05   | 0,00076482 |
| TRINITY_DN38770_c0_g1_i1 | dmso | control | 1,33172524 | -0,1560892 | 0,00528724 | 0,02819278 |
| TRINITY_DN24868_c0_g1_i1 | dmso | control | 1,32770663 | 0,02197281 | 0,00243123 | 0,01528244 |
| TRINITY_DN6242_c0_g1_i1  | dmso | control | 1,32455009 | 2,78402398 | 8,58E-09   | 2,28E-07   |
| TRINITY_DN39195_c0_g1_i1 | dmso | control | 1,32243026 | 3,2084293  | 6,53E-10   | 2,11E-08   |
| TRINITY_DN1626_c0_g1_i1  | dmso | control | 1,32101736 | 4,54407278 | 5,43E-11   | 2,08E-09   |
| TRINITY_DN6192_c0_g1_i1  | dmso | control | 1,31909623 | 3,288749   | 4,69E-07   | 8,85E-06   |
| TRINITY_DN24187_c0_g1_i1 | dmso | control | 1,3181046  | 1,46630288 | 5,00E-05   | 0,00057382 |
| TRINITY_DN2145_c0_g1_i1  | dmso | control | 1,31264644 | 4,32245044 | 1,14E-10   | 4,21E-09   |
| TRINITY_DN30926_c0_g1_i1 | dmso | control | 1,31149983 | -0,0543705 | 0,00209162 | 0,01354257 |
| TRINITY_DN14291_c0_g1_i1 | dmso | control | 1,3113291  | 2,70844866 | 3,20E-08   | 7,64E-07   |
| TRINITY_DN13771_c0_g1_i1 | dmso | control | 1,31076754 | 3,32833282 | 0,00019872 | 0,00187497 |
| TRINITY_DN19276_c0_g1_i1 | dmso | control | 1,30846178 | 4,16736622 | 2,66E-09   | 7,77E-08   |
| TRINITY_DN11557_c0_g1_i1 | dmso | control | 1,30451308 | 4,79084916 | 2,06E-13   | 1,17E-11   |
| TRINITY_DN22545_c0_g1_i1 | dmso | control | 1,30432993 | 2,10396326 | 6,68E-07   | 1,22E-05   |
| TRINITY_DN20945_c0_g1_i1 | dmso | control | 1,30319247 | 6,51717137 | 5,33E-18   | 4,96E-16   |
| TRINITY_DN41867_c0_g1_i1 | dmso | control | 1,3012752  | -0,1059447 | 0,00219382 | 0,01408433 |
| TRINITY_DN1222_c0_g1_i1  | dmso | control | 1,29780332 | 3,46980845 | 2,06E-07   | 4,23E-06   |
| TRINITY_DN37285_c0_g1_i1 | dmso | control | 1,29713746 | 1,77406055 | 5,35E-05   | 0,0006089  |
| TRINITY_DN29949_c0_g1_i1 | dmso | control | 1,29665065 | 0,97932073 | 0,00010429 | 0,00108381 |
| TRINITY_DN13936_c0_g1_i1 | dmso | control | 1,29633461 | 2,06063219 | 1,97E-06   | 3,21E-05   |
| TRINITY_DN43658_c0_g1_i1 | dmso | control | 1,2957035  | 0,17704414 | 0,00107427 | 0,00788908 |
| TRINITY_DN38490_c0_g1_i1 | dmso | control | 1,29555967 | 0,28026954 | 0,00274481 | 0,01682887 |
| TRINITY_DN43053_c0_g1_i1 | dmso | control | 1,294662   | 2,02987384 | 1,11E-06   | 1,91E-05   |
| TRINITY_DN16703_c0_g1_i1 | dmso | control | 1,29211771 | 0,00672405 | 0,00493784 | 0,02671428 |
| TRINITY_DN14152_c0_g1_i1 | dmso | control | 1,29164726 | 0,77125915 | 0,00908617 | 0,04299039 |
| TRINITY_DN23822_c0_g1_i1 | dmso | control | 1,29115574 | 4,0258372  | 5,86E-12   | 2,61E-10   |
| TRINITY_DN16834_c0_g1_i1 | dmso | control | 1,2908854  | 1,89303035 | 3,05E-06   | 4,76E-05   |
| TRINITY_DN17643_c0_g1_i1 | dmso | control | 1,28979246 | 0,03759095 | 0,00192552 | 0,01267739 |
| TRINITY_DN10402_c0_g1_i1 | dmso | control | 1,28868996 | 1,33946149 | 2,84E-05   | 0,00034826 |
| TRINITY_DN22504_c0_g1_i1 | dmso | control | 1,28619644 | 1,46923203 | 1,86E-05   | 0,00024118 |

|                          |      |         |            |            |            |            |
|--------------------------|------|---------|------------|------------|------------|------------|
| TRINITY_DN12657_c0_g1_i1 | dmso | control | 1,28490372 | 2,15675476 | 2,81E-06   | 4,43E-05   |
| TRINITY_DN3332_c0_g1_i1  | dmso | control | 1,28486396 | 1,95386475 | 0,02560529 | 0,09520421 |
| TRINITY_DN12506_c0_g1_i1 | dmso | control | 1,28437511 | 6,13548244 | 7,71E-26   | 1,45E-23   |
| TRINITY_DN34038_c0_g1_i1 | dmso | control | 1,28385686 | 3,07714701 | 4,93E-09   | 1,35E-07   |
| TRINITY_DN22855_c0_g1_i1 | dmso | control | 1,28023034 | 5,48800238 | 2,10E-18   | 2,03E-16   |
| TRINITY_DN11299_c0_g1_i1 | dmso | control | 1,27958567 | 6,28173925 | 1,42E-21   | 1,89E-19   |
| TRINITY_DN16865_c0_g1_i1 | dmso | control | 1,27618606 | 2,43922598 | 3,22E-06   | 4,99E-05   |
| TRINITY_DN22251_c0_g1_i1 | dmso | control | 1,26923429 | 2,6583037  | 2,69E-07   | 5,37E-06   |
| TRINITY_DN27454_c0_g1_i1 | dmso | control | 1,26863784 | 1,59182866 | 0,00330424 | 0,01956407 |
| TRINITY_DN33083_c0_g1_i1 | dmso | control | 1,26560261 | 4,52007673 | 2,24E-14   | 1,43E-12   |
| TRINITY_DN1561_c0_g1_i1  | dmso | control | 1,26290505 | 6,68725895 | 1,54E-24   | 2,71E-22   |
| TRINITY_DN26235_c0_g1_i1 | dmso | control | 1,26053438 | 1,98213996 | 2,11E-05   | 0,00026863 |
| TRINITY_DN1488_c0_g1_i1  | dmso | control | 1,25921757 | 3,4755699  | 4,62E-08   | 1,08E-06   |
| TRINITY_DN22210_c0_g1_i1 | dmso | control | 1,25812067 | -0,0760549 | 0,00370416 | 0,02137006 |
| TRINITY_DN20804_c0_g1_i1 | dmso | control | 1,25768836 | 1,99594165 | 3,08E-06   | 4,79E-05   |
| TRINITY_DN35600_c0_g1_i1 | dmso | control | 1,25453902 | 0,12628468 | 0,00386733 | 0,02208922 |
| TRINITY_DN7974_c0_g1_i1  | dmso | control | 1,25227373 | 1,98241185 | 4,37E-06   | 6,59E-05   |
| TRINITY_DN4445_c0_g1_i1  | dmso | control | 1,25198441 | 0,34098578 | 0,00403495 | 0,02283066 |
| TRINITY_DN39130_c0_g1_i1 | dmso | control | 1,25119867 | 2,23637938 | 3,00E-06   | 4,68E-05   |
| TRINITY_DN9281_c0_g1_i1  | dmso | control | 1,24999611 | 2,89002667 | 5,34E-06   | 7,93E-05   |
| TRINITY_DN17039_c0_g1_i1 | dmso | control | 1,24945002 | 2,3839159  | 9,38E-06   | 0,00013159 |
| TRINITY_DN6598_c0_g1_i1  | dmso | control | 1,24940888 | 5,75360791 | 2,31E-19   | 2,51E-17   |
| TRINITY_DN24368_c0_g1_i1 | dmso | control | 1,24708608 | 0,46879299 | 0,01290975 | 0,05685408 |
| TRINITY_DN21906_c0_g1_i1 | dmso | control | 1,24655846 | 1,47963885 | 2,68E-05   | 0,00033159 |
| TRINITY_DN33590_c0_g1_i1 | dmso | control | 1,24020617 | 3,64097002 | 3,10E-10   | 1,07E-08   |
| TRINITY_DN7278_c0_g1_i1  | dmso | control | 1,24015096 | 3,20607477 | 2,87E-08   | 6,92E-07   |
| TRINITY_DN4228_c0_g1_i1  | dmso | control | 1,2371869  | 3,56033898 | 1,23E-06   | 2,11E-05   |
| TRINITY_DN15493_c0_g1_i1 | dmso | control | 1,23636632 | 2,66782358 | 3,34E-06   | 5,14E-05   |
| TRINITY_DN12089_c0_g1_i1 | dmso | control | 1,23606312 | 4,43093322 | 1,01E-12   | 5,27E-11   |
| TRINITY_DN301_c0_g1_i1   | dmso | control | 1,23588242 | 6,06368685 | 1,17E-23   | 1,89E-21   |
| TRINITY_DN37330_c0_g1_i1 | dmso | control | 1,23488857 | 0,56333504 | 0,00084297 | 0,0064325  |

|                          |      |         |            |            |            |            |
|--------------------------|------|---------|------------|------------|------------|------------|
| TRINITY_DN15860_c0_g1_i1 | dmso | control | 1,22958372 | 3,87113795 | 1,96E-08   | 4,89E-07   |
| TRINITY_DN12609_c0_g1_i1 | dmso | control | 1,22930583 | 3,22186724 | 1,16E-08   | 3,04E-07   |
| TRINITY_DN24140_c0_g1_i1 | dmso | control | 1,22916476 | 0,57200482 | 0,00169971 | 0,01148378 |
| TRINITY_DN3501_c0_g1_i1  | dmso | control | 1,22804401 | 3,75676723 | 2,36E-10   | 8,18E-09   |
| TRINITY_DN13736_c0_g1_i1 | dmso | control | 1,22310113 | 4,13405237 | 3,17E-12   | 1,48E-10   |
| TRINITY_DN6932_c0_g1_i1  | dmso | control | 1,22265945 | 3,7978064  | 1,24E-10   | 4,53E-09   |
| TRINITY_DN13598_c0_g1_i1 | dmso | control | 1,22061255 | 3,67124066 | 3,94E-10   | 1,31E-08   |
| TRINITY_DN15255_c0_g1_i1 | dmso | control | 1,21903297 | 0,96989252 | 0,01154317 | 0,05196279 |
| TRINITY_DN1023_c0_g1_i1  | dmso | control | 1,21806911 | 5,16926161 | 2,05E-14   | 1,32E-12   |
| TRINITY_DN1448_c0_g1_i1  | dmso | control | 1,2173007  | 4,91001962 | 5,10E-12   | 2,29E-10   |
| TRINITY_DN672_c0_g1_i1   | dmso | control | 1,21596196 | 5,00981372 | 1,42E-12   | 7,18E-11   |
| TRINITY_DN32300_c0_g1_i1 | dmso | control | 1,21487641 | 5,87437222 | 1,36E-21   | 1,81E-19   |
| TRINITY_DN3742_c0_g1_i1  | dmso | control | 1,21442616 | 2,14692783 | 0,00444032 | 0,02464096 |
| TRINITY_DN36321_c0_g1_i1 | dmso | control | 1,21390851 | 1,47625129 | 0,00019911 | 0,00187737 |
| TRINITY_DN15157_c0_g1_i1 | dmso | control | 1,2135822  | 4,3110857  | 2,93E-11   | 1,18E-09   |
| TRINITY_DN8696_c0_g1_i1  | dmso | control | 1,21080522 | 1,37426869 | 0,00098636 | 0,00729954 |
| TRINITY_DN27622_c0_g1_i1 | dmso | control | 1,20846994 | 2,24408714 | 3,83E-05   | 0,00045432 |
| TRINITY_DN24991_c0_g1_i1 | dmso | control | 1,20600572 | 0,52858659 | 0,00162219 | 0,01105831 |
| TRINITY_DN16291_c0_g1_i1 | dmso | control | 1,20572585 | 0,83020623 | 0,00047371 | 0,0039527  |
| TRINITY_DN12305_c0_g1_i1 | dmso | control | 1,20327665 | 3,1991731  | 1,64E-08   | 4,15E-07   |
| TRINITY_DN7225_c0_g1_i1  | dmso | control | 1,20172875 | 3,22664872 | 5,28E-09   | 1,44E-07   |
| TRINITY_DN7866_c0_g1_i1  | dmso | control | 1,20004127 | 0,70906511 | 0,00075925 | 0,0058996  |
| TRINITY_DN6452_c0_g1_i1  | dmso | control | 1,19771746 | 2,36734998 | 0,00015267 | 0,0014982  |
| TRINITY_DN15667_c0_g1_i1 | dmso | control | 1,19709448 | 1,58828139 | 7,53E-05   | 0,00082012 |
| TRINITY_DN7932_c0_g1_i1  | dmso | control | 1,19677937 | 3,81263353 | 7,84E-08   | 1,76E-06   |
| TRINITY_DN7295_c0_g1_i1  | dmso | control | 1,19653476 | 3,7425722  | 2,06E-09   | 6,16E-08   |
| TRINITY_DN16069_c0_g1_i1 | dmso | control | 1,19610735 | 4,37936661 | 1,06E-10   | 3,93E-09   |
| TRINITY_DN25576_c0_g1_i1 | dmso | control | 1,19423081 | 1,37597403 | 0,0002725  | 0,0024648  |
| TRINITY_DN11458_c0_g1_i1 | dmso | control | 1,19397456 | 7,41210349 | 2,57E-17   | 2,26E-15   |
| TRINITY_DN7426_c0_g1_i1  | dmso | control | 1,19310412 | 1,81453691 | 1,59E-05   | 0,00020933 |
| TRINITY_DN8691_c0_g1_i1  | dmso | control | 1,18823559 | 7,53943086 | 2,97E-24   | 5,11E-22   |



|                          |      |         |            |            |            |            |
|--------------------------|------|---------|------------|------------|------------|------------|
| TRINITY_DN12148_c0_g1_i1 | dmso | control | 1,18700226 | 5,20259464 | 8,71E-17   | 7,32E-15   |
| TRINITY_DN7034_c0_g1_i1  | dmso | control | 1,18652436 | 3,99971101 | 6,87E-11   | 2,60E-09   |
| TRINITY_DN29208_c0_g1_i1 | dmso | control | 1,18537705 | 2,01710263 | 1,22E-05   | 0,00016735 |
| TRINITY_DN35637_c0_g1_i1 | dmso | control | 1,18400714 | 1,6481518  | 3,73E-05   | 0,00044395 |
| TRINITY_DN13656_c0_g1_i1 | dmso | control | 1,18397829 | 1,01039773 | 0,00050271 | 0,00415427 |
| TRINITY_DN41557_c0_g1_i1 | dmso | control | 1,18351947 | -0,0590264 | 0,00917353 | 0,04333277 |
| TRINITY_DN10200_c0_g1_i1 | dmso | control | 1,182574   | 0,91521808 | 0,00072664 | 0,00567979 |
| TRINITY_DN33333_c0_g1_i1 | dmso | control | 1,17782856 | 1,88714988 | 9,64E-05   | 0,00101522 |
| TRINITY_DN38912_c0_g1_i1 | dmso | control | 1,17345448 | 2,42691132 | 1,04E-05   | 0,00014463 |
| TRINITY_DN20885_c0_g1_i1 | dmso | control | 1,17158035 | 0,85970509 | 0,0006584  | 0,00523714 |
| TRINITY_DN6016_c0_g1_i1  | dmso | control | 1,1714354  | 5,28586607 | 3,76E-15   | 2,61E-13   |
| TRINITY_DN3085_c0_g1_i1  | dmso | control | 1,17068704 | 4,0004867  | 1,19E-09   | 3,65E-08   |
| TRINITY_DN22142_c0_g1_i1 | dmso | control | 1,16962781 | 1,28589211 | 0,00027201 | 0,00246194 |
| TRINITY_DN23366_c0_g1_i1 | dmso | control | 1,16914282 | 3,62495381 | 1,40E-09   | 4,26E-08   |
| TRINITY_DN45586_c0_g1_i1 | dmso | control | 1,16847686 | 0,01534533 | 0,00593785 | 0,0308533  |
| TRINITY_DN16415_c0_g1_i1 | dmso | control | 1,16669463 | 1,72283735 | 0,00287757 | 0,01750154 |
| TRINITY_DN25057_c0_g1_i1 | dmso | control | 1,16235375 | 0,47679837 | 0,00165195 | 0,01120301 |
| TRINITY_DN11908_c0_g1_i1 | dmso | control | 1,16213199 | 5,08634748 | 5,92E-14   | 3,59E-12   |
| TRINITY_DN3848_c0_g1_i1  | dmso | control | 1,16187647 | 3,18135849 | 3,05E-07   | 6,01E-06   |
| TRINITY_DN33066_c0_g1_i1 | dmso | control | 1,16141933 | 3,03764749 | 4,68E-08   | 1,09E-06   |
| TRINITY_DN39790_c0_g1_i1 | dmso | control | 1,1606411  | 0,94830444 | 0,0008642  | 0,00657018 |
| TRINITY_DN31404_c0_g1_i1 | dmso | control | 1,16060164 | 0,49770026 | 0,01378248 | 0,05948254 |
| TRINITY_DN2223_c0_g1_i1  | dmso | control | 1,15830414 | 3,8439654  | 7,02E-10   | 2,25E-08   |
| TRINITY_DN11330_c0_g1_i1 | dmso | control | 1,15791848 | 4,38479667 | 0,00272342 | 0,01671189 |
| TRINITY_DN22872_c0_g1_i1 | dmso | control | 1,15693569 | 4,03102876 | 7,54E-09   | 2,02E-07   |
| TRINITY_DN14040_c0_g1_i1 | dmso | control | 1,15291626 | 2,96256247 | 8,70E-07   | 1,54E-05   |
| TRINITY_DN42039_c0_g1_i1 | dmso | control | 1,15276661 | 1,85443057 | 0,00017976 | 0,00172216 |
| TRINITY_DN8305_c0_g1_i1  | dmso | control | 1,15114711 | 3,63976793 | 2,75E-07   | 5,47E-06   |
| TRINITY_DN1629_c0_g1_i1  | dmso | control | 1,15022752 | 2,90646215 | 5,71E-07   | 1,06E-05   |
| TRINITY_DN1731_c0_g1_i1  | dmso | control | 1,14812959 | 3,87383776 | 9,85E-10   | 3,08E-08   |
| TRINITY_DN2811_c0_g1_i1  | dmso | control | 1,14588311 | 4,94091341 | 1,18E-13   | 6,83E-12   |

|                          |      |         |            |            |            |            |
|--------------------------|------|---------|------------|------------|------------|------------|
| TRINITY_DN22339_c0_g1_i1 | dmso | control | 1,144633   | 2,25331376 | 4,36E-05   | 0,00050828 |
| TRINITY_DN6261_c0_g1_i1  | dmso | control | 1,14422178 | 6,12915758 | 4,66E-17   | 4,03E-15   |
| TRINITY_DN43481_c0_g1_i1 | dmso | control | 1,14349575 | 0,200966   | 0,00434375 | 0,02417938 |
| TRINITY_DN20318_c0_g1_i1 | dmso | control | 1,14277564 | 0,18916967 | 0,00397569 | 0,02258311 |
| TRINITY_DN2380_c0_g1_i1  | dmso | control | 1,14183821 | 2,94177956 | 1,56E-07   | 3,31E-06   |
| TRINITY_DN3691_c0_g1_i1  | dmso | control | 1,14037529 | 1,49513342 | 0,00033974 | 0,00298876 |
| TRINITY_DN17885_c0_g1_i1 | dmso | control | 1,14018124 | 1,37143159 | 0,00028157 | 0,00253953 |
| TRINITY_DN11797_c0_g1_i1 | dmso | control | 1,13918092 | 3,1868962  | 8,25E-07   | 1,47E-05   |
| TRINITY_DN22533_c0_g1_i1 | dmso | control | 1,13767299 | 0,20606086 | 0,00770057 | 0,03782566 |
| TRINITY_DN9315_c0_g1_i1  | dmso | control | 1,13721663 | 2,21284841 | 0,00254696 | 0,01585127 |
| TRINITY_DN3369_c0_g1_i1  | dmso | control | 1,13628085 | 3,89483692 | 1,72E-09   | 5,17E-08   |
| TRINITY_DN27699_c0_g1_i1 | dmso | control | 1,13613102 | 2,62668931 | 1,06E-06   | 1,84E-05   |
| TRINITY_DN43623_c0_g1_i1 | dmso | control | 1,13604654 | 0,75473776 | 0,00119454 | 0,00860174 |
| TRINITY_DN13557_c0_g1_i1 | dmso | control | 1,13581523 | 4,92117233 | 3,62E-06   | 5,53E-05   |
| TRINITY_DN14442_c0_g1_i1 | dmso | control | 1,13555192 | 0,6131885  | 0,00193942 | 0,01273456 |
| TRINITY_DN67742_c0_g1_i1 | dmso | control | 1,13458695 | 3,04474466 | 0,0133411  | 0,05818607 |
| TRINITY_DN36286_c0_g1_i1 | dmso | control | 1,13057885 | 1,28134887 | 0,00246164 | 0,01543224 |
| TRINITY_DN20431_c0_g1_i1 | dmso | control | 1,13017965 | 1,94617449 | 0,00011762 | 0,00120326 |
| TRINITY_DN2874_c0_g1_i1  | dmso | control | 1,13016458 | 4,60112313 | 3,67E-12   | 1,70E-10   |
| TRINITY_DN22701_c0_g1_i1 | dmso | control | 1,12859273 | 2,17224581 | 0,00094195 | 0,00701726 |
| TRINITY_DN21988_c0_g1_i1 | dmso | control | 1,12817729 | 1,51416986 | 0,00160353 | 0,01096404 |
| TRINITY_DN31699_c0_g1_i1 | dmso | control | 1,12708534 | -0,0955838 | 0,01153012 | 0,05193406 |
| TRINITY_DN19163_c0_g1_i1 | dmso | control | 1,12620401 | 4,11811061 | 1,48E-09   | 4,49E-08   |
| TRINITY_DN13658_c0_g1_i1 | dmso | control | 1,12587757 | 1,12413227 | 0,00214938 | 0,013873   |
| TRINITY_DN13823_c0_g1_i1 | dmso | control | 1,12375658 | 3,06408226 | 6,48E-07   | 1,18E-05   |
| TRINITY_DN6325_c0_g1_i1  | dmso | control | 1,12366628 | 3,74955963 | 8,28E-09   | 2,21E-07   |
| TRINITY_DN33476_c0_g1_i1 | dmso | control | 1,12351964 | 2,31756597 | 0,00030349 | 0,00271113 |
| TRINITY_DN20913_c0_g1_i1 | dmso | control | 1,12196121 | 1,70610902 | 0,00014423 | 0,00142995 |
| TRINITY_DN64957_c0_g1_i1 | dmso | control | 1,1218931  | 0,65313103 | 0,00243004 | 0,01528162 |
| TRINITY_DN579_c0_g1_i1   | dmso | control | 1,12126336 | 5,48885164 | 1,26E-15   | 9,21E-14   |
| TRINITY_DN12445_c0_g1_i1 | dmso | control | 1,11910872 | 3,13602739 | 0,00040311 | 0,0034406  |

|                          |      |         |            |            |            |            |
|--------------------------|------|---------|------------|------------|------------|------------|
| TRINITY_DN30320_c0_g1_i1 | dmso | control | 1,11818326 | 0,01332028 | 0,0063299  | 0,03242393 |
| TRINITY_DN4515_c0_g1_i1  | dmso | control | 1,11681032 | 3,15267549 | 1,45E-06   | 2,45E-05   |
| TRINITY_DN44037_c0_g1_i1 | dmso | control | 1,11524812 | 3,59835882 | 6,81E-09   | 1,84E-07   |
| TRINITY_DN12955_c0_g1_i1 | dmso | control | 1,11494948 | 4,81080953 | 5,25E-09   | 1,43E-07   |
| TRINITY_DN32582_c0_g1_i1 | dmso | control | 1,11334678 | 4,25395602 | 3,18E-06   | 4,93E-05   |
| TRINITY_DN28209_c0_g1_i1 | dmso | control | 1,11184186 | 0,55496805 | 0,00326966 | 0,01943633 |
| TRINITY_DN42307_c0_g1_i1 | dmso | control | 1,11050758 | 0,50626171 | 0,00368909 | 0,02131557 |
| TRINITY_DN4119_c0_g1_i1  | dmso | control | 1,11047257 | 1,77599648 | 0,01638233 | 0,06786427 |
| TRINITY_DN25407_c0_g1_i1 | dmso | control | 1,10964759 | 1,94757628 | 9,93E-05   | 0,00103896 |
| TRINITY_DN14260_c0_g1_i1 | dmso | control | 1,1090142  | 6,21235787 | 6,73E-16   | 5,23E-14   |
| TRINITY_DN27001_c0_g1_i1 | dmso | control | 1,10866413 | 2,40490643 | 0,0004698  | 0,00393423 |
| TRINITY_DN28243_c0_g1_i1 | dmso | control | 1,10792069 | 1,33233235 | 0,01412922 | 0,06050892 |
| TRINITY_DN18512_c0_g1_i1 | dmso | control | 1,10685886 | 1,96021364 | 4,60E-05   | 0,00053346 |
| TRINITY_DN46976_c0_g1_i1 | dmso | control | 1,10665106 | 1,63422481 | 0,00012646 | 0,0012774  |
| TRINITY_DN39967_c0_g1_i1 | dmso | control | 1,10504793 | -0,1322636 | 0,01057464 | 0,04855392 |
| TRINITY_DN12458_c0_g1_i1 | dmso | control | 1,10490675 | 4,5256935  | 1,35E-06   | 2,30E-05   |
| TRINITY_DN15328_c0_g1_i1 | dmso | control | 1,10489221 | 2,273189   | 0,00057548 | 0,00467277 |
| TRINITY_DN33295_c0_g1_i1 | dmso | control | 1,10386049 | 3,9873287  | 4,51E-06   | 6,78E-05   |
| TRINITY_DN3659_c0_g1_i1  | dmso | control | 1,1028724  | 3,82645925 | 1,35E-07   | 2,92E-06   |
| TRINITY_DN75509_c0_g1_i1 | dmso | control | 1,10274571 | 0,84037453 | 0,00845032 | 0,04076984 |
| TRINITY_DN7501_c0_g1_i1  | dmso | control | 1,10125571 | 3,57074792 | 2,05E-07   | 4,22E-06   |
| TRINITY_DN12598_c0_g1_i1 | dmso | control | 1,10053048 | 3,87605454 | 1,27E-08   | 3,31E-07   |
| TRINITY_DN31350_c0_g1_i1 | dmso | control | 1,1002473  | 0,66369985 | 0,00499189 | 0,02690593 |
| TRINITY_DN23873_c0_g1_i1 | dmso | control | 1,09744126 | 0,1371429  | 0,01508458 | 0,06360583 |
| TRINITY_DN18922_c0_g1_i1 | dmso | control | 1,09675676 | 4,94560493 | 1,21E-13   | 6,99E-12   |
| TRINITY_DN9970_c0_g1_i1  | dmso | control | 1,09651583 | 0,86532279 | 0,00675153 | 0,0340523  |
| TRINITY_DN32699_c0_g1_i1 | dmso | control | 1,09637303 | 2,19592557 | 0,00103946 | 0,00766069 |
| TRINITY_DN12652_c0_g1_i1 | dmso | control | 1,09551637 | 2,6035688  | 0,00086352 | 0,0065685  |
| TRINITY_DN8053_c0_g1_i1  | dmso | control | 1,09523887 | 2,80162497 | 9,30E-07   | 1,63E-05   |
| TRINITY_DN1556_c0_g1_i1  | dmso | control | 1,09418709 | 4,92887852 | 1,64E-06   | 2,75E-05   |
| TRINITY_DN35573_c0_g1_i1 | dmso | control | 1,09355661 | 1,3289317  | 0,00075634 | 0,00588198 |

|                          |      |         |            |            |            |            |
|--------------------------|------|---------|------------|------------|------------|------------|
| TRINITY_DN8662_c0_g1_i1  | dmso | control | 1,09279768 | 1,00070325 | 0,00681712 | 0,03431362 |
| TRINITY_DN14984_c0_g1_i1 | dmso | control | 1,09266387 | 1,39763653 | 0,00046655 | 0,00391137 |
| TRINITY_DN22166_c0_g1_i1 | dmso | control | 1,09247022 | 0,40943153 | 0,00817948 | 0,0397285  |
| TRINITY_DN27757_c0_g1_i1 | dmso | control | 1,09135542 | 1,49638253 | 0,00830583 | 0,04019356 |
| TRINITY_DN9581_c0_g1_i1  | dmso | control | 1,09059052 | 3,15695702 | 4,54E-07   | 8,61E-06   |
| TRINITY_DN7451_c0_g1_i1  | dmso | control | 1,0883016  | 1,60492652 | 0,01609349 | 0,06701369 |
| TRINITY_DN30980_c0_g1_i1 | dmso | control | 1,08819207 | 0,64884485 | 0,00596028 | 0,03093647 |
| TRINITY_DN4951_c0_g1_i1  | dmso | control | 1,08800327 | 6,02508774 | 1,08E-16   | 8,96E-15   |
| TRINITY_DN19301_c0_g1_i1 | dmso | control | 1,08646999 | 2,8490003  | 3,20E-06   | 4,96E-05   |
| TRINITY_DN20482_c0_g1_i1 | dmso | control | 1,08630809 | 3,17243365 | 4,31E-07   | 8,23E-06   |
| TRINITY_DN17907_c0_g1_i1 | dmso | control | 1,08602046 | 4,51259543 | 6,63E-11   | 2,52E-09   |
| TRINITY_DN2099_c0_g1_i1  | dmso | control | 1,08519349 | 3,28799806 | 2,43E-07   | 4,89E-06   |
| TRINITY_DN13052_c0_g1_i1 | dmso | control | 1,08442554 | 5,28052251 | 1,75E-10   | 6,20E-09   |
| TRINITY_DN3220_c0_g1_i1  | dmso | control | 1,08413771 | 1,56272849 | 0,00019618 | 0,00185334 |
| TRINITY_DN12537_c0_g1_i1 | dmso | control | 1,08339806 | 2,83181599 | 2,11E-05   | 0,00026819 |
| TRINITY_DN15431_c0_g1_i1 | dmso | control | 1,08331493 | 4,25343925 | 4,06E-08   | 9,57E-07   |
| TRINITY_DN54254_c0_g1_i1 | dmso | control | 1,0823828  | -0,1692319 | 0,02119994 | 0,08276571 |
| TRINITY_DN20016_c0_g1_i1 | dmso | control | 1,08089234 | 3,9356643  | 4,65E-06   | 6,97E-05   |
| TRINITY_DN7382_c0_g1_i1  | dmso | control | 1,07802949 | 4,60256285 | 1,37E-11   | 5,86E-10   |
| TRINITY_DN63568_c0_g1_i1 | dmso | control | 1,07662594 | 2,57506491 | 1,47E-05   | 0,00019641 |
| TRINITY_DN23042_c0_g1_i1 | dmso | control | 1,07547603 | 2,36009967 | 1,68E-05   | 0,00021944 |
| TRINITY_DN2330_c0_g1_i1  | dmso | control | 1,07483076 | 2,99221056 | 2,61E-05   | 0,0003233  |
| TRINITY_DN3276_c0_g1_i1  | dmso | control | 1,07325335 | 1,53560116 | 0,00551435 | 0,0291562  |
| TRINITY_DN20682_c0_g1_i1 | dmso | control | 1,07058419 | 2,88115545 | 0,00025647 | 0,0023374  |
| TRINITY_DN33920_c0_g1_i1 | dmso | control | 1,0704375  | 0,50890898 | 0,00886124 | 0,04220265 |
| TRINITY_DN14131_c0_g1_i1 | dmso | control | 1,06911721 | 4,51053859 | 6,91E-11   | 2,61E-09   |
| TRINITY_DN4704_c0_g1_i1  | dmso | control | 1,0689154  | 9,53510274 | 2,15E-22   | 3,08E-20   |
| TRINITY_DN15269_c0_g1_i1 | dmso | control | 1,06847538 | 0,51899906 | 0,00606005 | 0,03139794 |
| TRINITY_DN32944_c0_g1_i1 | dmso | control | 1,06820714 | 2,70892045 | 8,50E-06   | 0,00012055 |
| TRINITY_DN10393_c0_g1_i1 | dmso | control | 1,06781725 | 0,49574734 | 0,00723605 | 0,03604301 |
| TRINITY_DN1857_c0_g1_i1  | dmso | control | 1,06595653 | 4,55002531 | 5,02E-10   | 1,65E-08   |

|                          |      |         |            |            |            |            |
|--------------------------|------|---------|------------|------------|------------|------------|
| TRINITY_DN33707_c0_g1_i1 | dmso | control | 1,06518149 | 0,86611831 | 0,0025451  | 0,01584652 |
| TRINITY_DN4050_c0_g1_i1  | dmso | control | 1,0626783  | 1,24977602 | 0,00259982 | 0,01611774 |
| TRINITY_DN4668_c0_g1_i1  | dmso | control | 1,06250729 | 3,60728444 | 3,66E-08   | 8,66E-07   |
| TRINITY_DN21625_c0_g1_i1 | dmso | control | 1,05942888 | 1,99464066 | 0,00016528 | 0,00160238 |
| TRINITY_DN10193_c0_g1_i1 | dmso | control | 1,05930777 | 0,52377243 | 0,00751477 | 0,03711141 |
| TRINITY_DN975_c0_g1_i1   | dmso | control | 1,05923421 | 5,19925381 | 6,17E-14   | 3,73E-12   |
| TRINITY_DN19986_c0_g1_i1 | dmso | control | 1,05689331 | 0,33946107 | 0,01448671 | 0,06156534 |
| TRINITY_DN3997_c0_g1_i1  | dmso | control | 1,05526285 | 2,88745603 | 1,73E-06   | 2,89E-05   |
| TRINITY_DN34766_c0_g1_i1 | dmso | control | 1,05519888 | 0,10350061 | 0,01827032 | 0,07392572 |
| TRINITY_DN60488_c0_g1_i1 | dmso | control | 1,05467821 | 0,59227066 | 0,00875898 | 0,04183979 |
| TRINITY_DN4344_c0_g1_i1  | dmso | control | 1,05430686 | 5,40628989 | 7,47E-14   | 4,46E-12   |
| TRINITY_DN15986_c0_g1_i1 | dmso | control | 1,05425135 | 1,174937   | 0,00209372 | 0,01355009 |
| TRINITY_DN8240_c0_g1_i1  | dmso | control | 1,05368039 | 1,63200439 | 0,00031965 | 0,0028362  |
| TRINITY_DN14979_c0_g1_i1 | dmso | control | 1,05325915 | 2,06332693 | 0,00018522 | 0,00176721 |
| TRINITY_DN28421_c0_g1_i1 | dmso | control | 1,05320477 | 0,26057114 | 0,00819017 | 0,03976706 |
| TRINITY_DN13094_c0_g1_i1 | dmso | control | 1,05244524 | 4,39659207 | 6,35E-10   | 2,07E-08   |
| TRINITY_DN597_c0_g1_i1   | dmso | control | 1,05236    | 5,13055793 | 2,00E-12   | 9,69E-11   |
| TRINITY_DN22213_c0_g1_i1 | dmso | control | 1,05097132 | 8,26894385 | 4,88E-07   | 9,15E-06   |
| TRINITY_DN33962_c0_g1_i1 | dmso | control | 1,0509397  | 1,16897629 | 0,00127865 | 0,0091346  |
| TRINITY_DN26401_c0_g1_i1 | dmso | control | 1,04758219 | 0,43853779 | 0,01667427 | 0,06885643 |
| TRINITY_DN10263_c0_g1_i1 | dmso | control | 1,04745476 | 5,37651901 | 4,83E-11   | 1,87E-09   |
| TRINITY_DN15586_c0_g1_i1 | dmso | control | 1,04742071 | 0,64421928 | 0,01108719 | 0,05036305 |
| TRINITY_DN6487_c0_g1_i1  | dmso | control | 1,04718182 | 2,81613541 | 9,81E-05   | 0,00102875 |
| TRINITY_DN13593_c0_g1_i1 | dmso | control | 1,04649752 | 0,05071126 | 0,00939963 | 0,04424168 |
| TRINITY_DN6550_c0_g1_i1  | dmso | control | 1,04623134 | 3,7356854  | 2,47E-08   | 6,04E-07   |
| TRINITY_DN13575_c0_g1_i1 | dmso | control | 1,04531529 | 4,16683335 | 3,19E-08   | 7,62E-07   |
| TRINITY_DN3360_c0_g1_i1  | dmso | control | 1,04444831 | 1,2653212  | 0,00164816 | 0,0111878  |
| TRINITY_DN5107_c0_g1_i1  | dmso | control | 1,04361039 | 4,55001519 | 2,80E-08   | 6,76E-07   |
| TRINITY_DN7619_c0_g1_i1  | dmso | control | 1,04314855 | 2,58662454 | 0,00547019 | 0,02897577 |
| TRINITY_DN3845_c0_g1_i1  | dmso | control | 1,04291865 | 2,44285422 | 5,65E-05   | 0,00063981 |
| TRINITY_DN14717_c0_g1_i1 | dmso | control | 1,04246858 | 2,22430514 | 0,00010756 | 0,0011122  |

|                          |      |         |            |            |            |            |
|--------------------------|------|---------|------------|------------|------------|------------|
| TRINITY_DN80_c0_g1_i1    | dmso | control | 1,04239288 | 8,03159473 | 2,84E-20   | 3,45E-18   |
| TRINITY_DN14159_c0_g1_i1 | dmso | control | 1,04087805 | 3,76635153 | 3,44E-07   | 6,68E-06   |
| TRINITY_DN45102_c0_g1_i1 | dmso | control | 1,04081503 | 0,60227982 | 0,00731119 | 0,0363546  |
| TRINITY_DN26979_c0_g1_i1 | dmso | control | 1,03957534 | 0,22703234 | 0,01587299 | 0,06629875 |
| TRINITY_DN2659_c0_g1_i1  | dmso | control | 1,03883781 | 3,64677092 | 9,25E-07   | 1,63E-05   |
| TRINITY_DN2932_c0_g1_i1  | dmso | control | 1,03872266 | 1,71527071 | 0,00072777 | 0,00568559 |
| TRINITY_DN4878_c0_g1_i1  | dmso | control | 1,03818166 | 5,39077377 | 6,18E-11   | 2,36E-09   |
| TRINITY_DN314_c0_g1_i1   | dmso | control | 1,03759908 | 9,15773828 | 6,21E-18   | 5,75E-16   |
| TRINITY_DN9950_c0_g1_i1  | dmso | control | 1,03729255 | 2,22420167 | 0,00014609 | 0,00144637 |
| TRINITY_DN278_c0_g1_i1   | dmso | control | 1,03566074 | 7,63776253 | 3,38E-20   | 4,07E-18   |
| TRINITY_DN3163_c0_g1_i1  | dmso | control | 1,03414716 | 5,84294942 | 3,68E-16   | 2,92E-14   |
| TRINITY_DN194_c0_g1_i1   | dmso | control | 1,03349552 | 8,35947133 | 1,44E-14   | 9,46E-13   |
| TRINITY_DN22291_c0_g1_i1 | dmso | control | 1,03256019 | 1,38592498 | 0,0005553  | 0,00452923 |
| TRINITY_DN23723_c0_g1_i1 | dmso | control | 1,0312777  | 0,58120095 | 0,00687279 | 0,03455531 |
| TRINITY_DN16752_c0_g1_i1 | dmso | control | 1,03069802 | 5,14983291 | 4,11E-11   | 1,62E-09   |
| TRINITY_DN43976_c0_g1_i1 | dmso | control | 1,03059712 | 1,07090389 | 0,00157777 | 0,01081248 |
| TRINITY_DN38497_c0_g1_i1 | dmso | control | 1,03015577 | 1,60112479 | 0,00075502 | 0,00587937 |
| TRINITY_DN62771_c0_g1_i1 | dmso | control | 1,02931898 | 0,04627803 | 0,02277545 | 0,08724248 |
| TRINITY_DN7357_c0_g1_i1  | dmso | control | 1,02919675 | 4,99268132 | 2,01E-11   | 8,35E-10   |
| TRINITY_DN6462_c0_g1_i1  | dmso | control | 1,02861146 | 3,93300151 | 9,54E-08   | 2,12E-06   |
| TRINITY_DN26291_c0_g1_i1 | dmso | control | 1,02854102 | 1,45695087 | 0,0008418  | 0,00642697 |
| TRINITY_DN22117_c0_g1_i1 | dmso | control | 1,02833941 | 2,4472444  | 0,00028326 | 0,00255096 |
| TRINITY_DN14528_c0_g1_i1 | dmso | control | 1,02824714 | 1,88106035 | 0,00031191 | 0,00277602 |
| TRINITY_DN4484_c0_g1_i1  | dmso | control | 1,02824543 | 0,42144812 | 0,0235995  | 0,08963838 |
| TRINITY_DN26866_c0_g1_i1 | dmso | control | 1,02813483 | 0,92492525 | 0,00251582 | 0,01571843 |
| TRINITY_DN36936_c0_g1_i1 | dmso | control | 1,02585964 | 0,60299831 | 0,00451171 | 0,02497955 |
| TRINITY_DN11301_c0_g1_i1 | dmso | control | 1,02471377 | 5,11157815 | 4,80E-12   | 2,16E-10   |
| TRINITY_DN9577_c0_g1_i1  | dmso | control | 1,0245579  | 3,01340613 | 2,12E-06   | 3,43E-05   |
| TRINITY_DN25958_c0_g1_i1 | dmso | control | 1,02436335 | 2,82613155 | 5,23E-05   | 0,00059655 |
| TRINITY_DN7906_c0_g1_i1  | dmso | control | 1,02385561 | 1,4096426  | 0,00058606 | 0,00474024 |
| TRINITY_DN8430_c0_g1_i1  | dmso | control | 1,02311681 | 1,96836796 | 0,00147259 | 0,0102267  |

|                          |      |         |            |            |            |            |
|--------------------------|------|---------|------------|------------|------------|------------|
| TRINITY_DN11385_c0_g1_i1 | dmso | control | 1,02290483 | 7,13785401 | 4,94E-13   | 2,67E-11   |
| TRINITY_DN12564_c0_g1_i1 | dmso | control | 1,02247463 | 4,45927735 | 6,76E-10   | 2,17E-08   |
| TRINITY_DN17236_c0_g1_i1 | dmso | control | 1,02201672 | 1,1069251  | 0,00150398 | 0,01039471 |
| TRINITY_DN10400_c0_g1_i1 | dmso | control | 1,02057864 | 3,08987238 | 1,21E-06   | 2,09E-05   |
| TRINITY_DN790_c0_g1_i1   | dmso | control | 1,01732892 | 5,28705931 | 2,74E-11   | 1,10E-09   |
| TRINITY_DN33456_c0_g1_i1 | dmso | control | 1,01640501 | 1,06628774 | 0,002069   | 0,01344459 |
| TRINITY_DN7976_c0_g1_i1  | dmso | control | 1,01574769 | 3,57351866 | 1,98E-07   | 4,10E-06   |
| TRINITY_DN15702_c0_g1_i1 | dmso | control | 1,01506155 | 4,08619149 | 1,59E-05   | 0,00020967 |
| TRINITY_DN13633_c0_g1_i1 | dmso | control | 1,01416552 | 0,68962991 | 0,00570011 | 0,0299411  |
| TRINITY_DN9374_c0_g1_i1  | dmso | control | 1,01357051 | 7,19611543 | 9,41E-19   | 9,57E-17   |
| TRINITY_DN2673_c0_g1_i1  | dmso | control | 1,01347106 | 3,05172904 | 6,68E-05   | 0,00073958 |
| TRINITY_DN19593_c0_g1_i1 | dmso | control | 1,0133998  | 3,1485004  | 5,46E-06   | 8,06E-05   |
| TRINITY_DN20080_c0_g1_i1 | dmso | control | 1,01275153 | 2,22687088 | 0,00011801 | 0,00120555 |
| TRINITY_DN37826_c0_g1_i1 | dmso | control | 1,01141347 | 1,36855899 | 0,00244698 | 0,0153681  |
| TRINITY_DN9311_c0_g1_i1  | dmso | control | 1,01010206 | 1,05377646 | 0,00519823 | 0,02775914 |
| TRINITY_DN1769_c0_g1_i1  | dmso | control | 1,01002925 | 5,04245281 | 9,55E-12   | 4,17E-10   |
| TRINITY_DN40642_c0_g1_i1 | dmso | control | 1,00967317 | 0,25577274 | 0,00937357 | 0,04413338 |
| TRINITY_DN35771_c0_g1_i1 | dmso | control | 1,00864279 | 0,20945686 | 0,01026423 | 0,04739987 |
| TRINITY_DN7849_c0_g1_i1  | dmso | control | 1,00751481 | 4,22903274 | 6,91E-09   | 1,86E-07   |
| TRINITY_DN12329_c0_g1_i1 | dmso | control | 1,00671381 | 1,56064605 | 0,00047394 | 0,0039527  |
| TRINITY_DN13559_c0_g1_i1 | dmso | control | 1,00611269 | 4,09959371 | 3,02E-07   | 5,96E-06   |
| TRINITY_DN7979_c0_g1_i1  | dmso | control | 1,00489531 | 2,80560314 | 1,23E-05   | 0,0001693  |
| TRINITY_DN20281_c0_g1_i1 | dmso | control | 1,00463664 | 2,20004389 | 0,00040712 | 0,00347154 |
| TRINITY_DN22465_c0_g1_i1 | dmso | control | 1,00437491 | 2,64909789 | 0,00016131 | 0,00157444 |
| TRINITY_DN295_c0_g1_i1   | dmso | control | 0,99936603 | 6,07515769 | 9,46E-10   | 2,98E-08   |
| TRINITY_DN2898_c0_g1_i1  | dmso | control | 0,99885207 | 1,45360445 | 0,00114507 | 0,00829931 |
| TRINITY_DN17905_c0_g1_i1 | dmso | control | 0,99871633 | 1,74662096 | 0,00062249 | 0,00498714 |
| TRINITY_DN21570_c0_g1_i1 | dmso | control | 0,99756361 | 0,60484015 | 0,00819529 | 0,03977853 |
| TRINITY_DN14078_c0_g1_i1 | dmso | control | 0,99722162 | 4,25190933 | 1,15E-08   | 3,04E-07   |
| TRINITY_DN10004_c0_g1_i1 | dmso | control | 0,9957979  | 3,0012857  | 1,61E-05   | 0,00021162 |
| TRINITY_DN27635_c0_g1_i1 | dmso | control | 0,99535321 | 2,23304078 | 9,97E-05   | 0,00104159 |

|                          |      |         |            |            |            |            |
|--------------------------|------|---------|------------|------------|------------|------------|
| TRINITY_DN22165_c0_g1_i1 | dmso | control | 0,99481323 | 3,38218802 | 9,73E-07   | 1,70E-05   |
| TRINITY_DN23041_c0_g1_i1 | dmso | control | 0,99432609 | 0,73640151 | 0,01271051 | 0,0562338  |
| TRINITY_DN19671_c0_g1_i1 | dmso | control | 0,9937614  | 4,87949389 | 1,12E-10   | 4,12E-09   |
| TRINITY_DN12286_c0_g1_i1 | dmso | control | 0,99360802 | 2,72833107 | 1,93E-05   | 0,00024828 |
| TRINITY_DN14311_c0_g1_i1 | dmso | control | 0,99271247 | 2,68534789 | 8,20E-05   | 0,00088028 |
| TRINITY_DN40665_c0_g1_i1 | dmso | control | 0,99157016 | 0,18042926 | 0,01440481 | 0,06130744 |
| TRINITY_DN4754_c0_g1_i1  | dmso | control | 0,98901114 | 5,23817514 | 6,46E-10   | 2,09E-08   |
| TRINITY_DN3304_c0_g1_i1  | dmso | control | 0,98686728 | 4,21364759 | 2,29E-08   | 5,64E-07   |
| TRINITY_DN19794_c0_g1_i1 | dmso | control | 0,9866729  | 3,03107648 | 2,17E-05   | 0,00027455 |
| TRINITY_DN12520_c0_g1_i1 | dmso | control | 0,986473   | 1,47330385 | 0,00303974 | 0,01831069 |
| TRINITY_DN29938_c0_g1_i1 | dmso | control | 0,98609858 | 0,26597214 | 0,01081758 | 0,04948066 |
| TRINITY_DN44160_c0_g1_i1 | dmso | control | 0,98582822 | 0,33877705 | 0,00989371 | 0,04611639 |
| TRINITY_DN27011_c0_g1_i1 | dmso | control | 0,98380462 | 1,36462151 | 0,00254228 | 0,01584652 |
| TRINITY_DN9826_c0_g1_i1  | dmso | control | 0,98317412 | 6,64135217 | 9,34E-13   | 4,93E-11   |
| TRINITY_DN16871_c0_g1_i1 | dmso | control | 0,98261679 | 0,73230996 | 0,00980656 | 0,04579883 |
| TRINITY_DN34799_c0_g1_i1 | dmso | control | 0,98128195 | 1,39644762 | 0,00473484 | 0,02587831 |
| TRINITY_DN50056_c0_g1_i1 | dmso | control | 0,98079683 | 1,89422977 | 0,00072957 | 0,00569654 |
| TRINITY_DN70037_c0_g1_i1 | dmso | control | 0,9807792  | -0,11676   | 0,02093292 | 0,08194471 |
| TRINITY_DN11634_c0_g1_i1 | dmso | control | 0,98052735 | 3,4165528  | 1,93E-06   | 3,16E-05   |
| TRINITY_DN14262_c0_g1_i1 | dmso | control | 0,98040942 | 2,86944805 | 2,57E-05   | 0,00031975 |
| TRINITY_DN35943_c0_g1_i1 | dmso | control | 0,97921739 | 1,228153   | 0,00419877 | 0,02352648 |
| TRINITY_DN10826_c0_g1_i1 | dmso | control | 0,97917498 | 3,56149498 | 3,93E-06   | 5,94E-05   |
| TRINITY_DN15819_c0_g1_i1 | dmso | control | 0,97660447 | 3,09415665 | 2,53E-05   | 0,00031561 |
| TRINITY_DN20007_c0_g1_i1 | dmso | control | 0,97568692 | 1,5952368  | 0,00136335 | 0,00960197 |
| TRINITY_DN15627_c0_g1_i1 | dmso | control | 0,97387074 | 2,68003721 | 0,00013967 | 0,00139234 |
| TRINITY_DN14971_c0_g1_i1 | dmso | control | 0,97149938 | 3,71104448 | 4,29E-05   | 0,00050113 |
| TRINITY_DN25545_c0_g1_i1 | dmso | control | 0,97104608 | 1,00503153 | 0,01729798 | 0,07084471 |
| TRINITY_DN8807_c0_g1_i1  | dmso | control | 0,97082335 | 0,95436118 | 0,01409784 | 0,06044621 |
| TRINITY_DN23016_c0_g1_i1 | dmso | control | 0,9704446  | 1,55967847 | 0,00952916 | 0,04473473 |
| TRINITY_DN24922_c0_g1_i1 | dmso | control | 0,9693832  | 1,14082583 | 0,0022235  | 0,01422427 |
| TRINITY_DN8911_c0_g1_i1  | dmso | control | 0,96903506 | 2,7153166  | 3,88E-05   | 0,00045932 |



|                          |      |         |            |            |            |            |
|--------------------------|------|---------|------------|------------|------------|------------|
| TRINITY_DN36445_c0_g1_i1 | dmso | control | 0,96824286 | 2,96689118 | 0,0022249  | 0,01422694 |
| TRINITY_DN21811_c0_g1_i1 | dmso | control | 0,96424925 | 2,71775697 | 9,75E-05   | 0,00102538 |
| TRINITY_DN19914_c0_g1_i1 | dmso | control | 0,96152827 | 3,10303916 | 7,88E-06   | 0,0001128  |
| TRINITY_DN40285_c0_g1_i1 | dmso | control | 0,95938196 | 1,52297206 | 0,00108149 | 0,00792986 |
| TRINITY_DN14918_c0_g1_i1 | dmso | control | 0,95790551 | 1,44935275 | 0,00131148 | 0,00931593 |
| TRINITY_DN3791_c0_g1_i1  | dmso | control | 0,95779807 | 2,2281721  | 0,00043473 | 0,00367021 |
| TRINITY_DN19591_c0_g1_i1 | dmso | control | 0,95721447 | 4,29752517 | 1,04E-05   | 0,0001444  |
| TRINITY_DN21129_c0_g1_i1 | dmso | control | 0,95714154 | 1,47484653 | 0,0020888  | 0,01353558 |
| TRINITY_DN651_c0_g1_i1   | dmso | control | 0,95678478 | 6,04109672 | 2,04E-08   | 5,07E-07   |
| TRINITY_DN22237_c0_g1_i1 | dmso | control | 0,95661417 | 0,84208481 | 0,00659097 | 0,03348668 |
| TRINITY_DN1125_c0_g1_i1  | dmso | control | 0,95610559 | 4,88818876 | 1,72E-10   | 6,09E-09   |
| TRINITY_DN41008_c0_g1_i1 | dmso | control | 0,95552031 | 0,57275912 | 0,0136207  | 0,05901349 |
| TRINITY_DN11130_c0_g1_i1 | dmso | control | 0,9549767  | 6,32903763 | 1,30E-15   | 9,43E-14   |
| TRINITY_DN56_c0_g1_i1    | dmso | control | 0,95488124 | 6,23946046 | 1,49E-06   | 2,52E-05   |
| TRINITY_DN50313_c0_g1_i1 | dmso | control | 0,95439671 | 3,0636788  | 0,00017506 | 0,00168136 |
| TRINITY_DN7848_c0_g1_i1  | dmso | control | 0,95414939 | 3,51075416 | 1,61E-06   | 2,71E-05   |
| TRINITY_DN22156_c0_g1_i1 | dmso | control | 0,95335262 | 1,87710802 | 0,00038435 | 0,00330279 |
| TRINITY_DN15472_c0_g1_i1 | dmso | control | 0,95298603 | 0,8453457  | 0,00554595 | 0,02926973 |
| TRINITY_DN7367_c0_g1_i1  | dmso | control | 0,95253071 | 3,5232822  | 7,67E-07   | 1,38E-05   |
| TRINITY_DN16904_c0_g1_i1 | dmso | control | 0,95240347 | 0,73920704 | 0,00716612 | 0,03575634 |
| TRINITY_DN21429_c0_g1_i1 | dmso | control | 0,95072545 | 2,43702055 | 0,00328022 | 0,01947733 |
| TRINITY_DN5968_c0_g1_i1  | dmso | control | 0,95025968 | 3,6275907  | 1,30E-05   | 0,00017711 |
| TRINITY_DN8952_c0_g1_i1  | dmso | control | 0,9494109  | 7,11830386 | 5,81E-16   | 4,56E-14   |
| TRINITY_DN13829_c0_g1_i1 | dmso | control | 0,94901216 | 2,78271196 | 0,0003605  | 0,00313237 |
| TRINITY_DN17600_c0_g1_i1 | dmso | control | 0,94899858 | 4,37668133 | 2,71E-06   | 4,30E-05   |
| TRINITY_DN18561_c0_g1_i1 | dmso | control | 0,94800556 | 3,14232411 | 5,08E-05   | 0,00058131 |
| TRINITY_DN21521_c0_g1_i1 | dmso | control | 0,94709065 | 2,33713716 | 0,00012273 | 0,00124744 |
| TRINITY_DN10669_c0_g1_i1 | dmso | control | 0,94673338 | 2,89956097 | 1,29E-05   | 0,00017568 |
| TRINITY_DN33583_c0_g1_i1 | dmso | control | 0,9465168  | 2,10070062 | 0,00086128 | 0,00655493 |
| TRINITY_DN3507_c0_g1_i1  | dmso | control | 0,94629771 | 1,69938218 | 0,00083414 | 0,00637633 |
| TRINITY_DN9282_c0_g1_i1  | dmso | control | 0,94609196 | 5,9169197  | 3,76E-14   | 2,33E-12   |

|                          |      |         |            |            |            |            |
|--------------------------|------|---------|------------|------------|------------|------------|
| TRINITY_DN37754_c0_g1_i1 | dmso | control | 0,94529428 | 0,14683545 | 0,02037464 | 0,08028142 |
| TRINITY_DN75534_c0_g1_i1 | dmso | control | 0,94502858 | 1,18725224 | 0,00335103 | 0,0197624  |
| TRINITY_DN19207_c0_g1_i1 | dmso | control | 0,94395974 | 4,4249349  | 0,0007018  | 0,00551251 |
| TRINITY_DN213_c0_g1_i1   | dmso | control | 0,94382679 | 5,86690621 | 1,49E-12   | 7,43E-11   |
| TRINITY_DN21668_c0_g1_i1 | dmso | control | 0,94375243 | 1,13947382 | 0,00268879 | 0,01653454 |
| TRINITY_DN46_c0_g1_i1    | dmso | control | 0,94241071 | 8,40779486 | 1,48E-05   | 0,00019769 |
| TRINITY_DN3775_c0_g1_i1  | dmso | control | 0,94230974 | 1,7132171  | 0,00263732 | 0,01629432 |
| TRINITY_DN6343_c0_g1_i1  | dmso | control | 0,94230387 | 7,18854864 | 1,90E-11   | 7,95E-10   |
| TRINITY_DN52677_c0_g1_i1 | dmso | control | 0,94223962 | 0,01186871 | 0,02080222 | 0,08149935 |
| TRINITY_DN12346_c0_g1_i1 | dmso | control | 0,94213538 | 3,8399902  | 0,00015901 | 0,00155405 |
| TRINITY_DN1167_c0_g1_i1  | dmso | control | 0,94168586 | 5,55929141 | 1,39E-12   | 7,07E-11   |
| TRINITY_DN6379_c0_g1_i1  | dmso | control | 0,94000226 | 4,17104186 | 2,25E-07   | 4,56E-06   |
| TRINITY_DN46543_c0_g1_i1 | dmso | control | 0,93935645 | 3,35395861 | 4,43E-06   | 6,66E-05   |
| TRINITY_DN10091_c0_g1_i1 | dmso | control | 0,93928731 | 3,32674042 | 2,55E-06   | 4,06E-05   |
| TRINITY_DN3703_c0_g1_i1  | dmso | control | 0,9387208  | 1,30240959 | 0,00664097 | 0,03364741 |
| TRINITY_DN44681_c0_g1_i1 | dmso | control | 0,93860678 | 4,9715402  | 0,00043334 | 0,00366272 |
| TRINITY_DN29984_c0_g1_i1 | dmso | control | 0,93845761 | 1,23216638 | 0,00306644 | 0,01845495 |
| TRINITY_DN19073_c0_g1_i1 | dmso | control | 0,93823317 | 5,93010202 | 1,17E-11   | 5,05E-10   |
| TRINITY_DN22602_c0_g1_i1 | dmso | control | 0,93788278 | 0,89655792 | 0,00549898 | 0,02908562 |
| TRINITY_DN1921_c0_g1_i1  | dmso | control | 0,93787463 | 4,63742891 | 2,13E-06   | 3,45E-05   |
| TRINITY_DN7008_c0_g1_i1  | dmso | control | 0,93638941 | 2,26457556 | 0,0003989  | 0,00340864 |
| TRINITY_DN20033_c0_g1_i1 | dmso | control | 0,93439565 | 2,55860542 | 7,24E-05   | 0,00079391 |
| TRINITY_DN20309_c0_g1_i1 | dmso | control | 0,93319573 | 3,60969572 | 7,01E-05   | 0,00077106 |
| TRINITY_DN17608_c0_g1_i1 | dmso | control | 0,93319517 | 3,29530734 | 7,73E-06   | 0,00011093 |
| TRINITY_DN11586_c0_g1_i1 | dmso | control | 0,93110622 | 3,82742866 | 4,55E-07   | 8,62E-06   |
| TRINITY_DN11690_c0_g1_i1 | dmso | control | 0,92963993 | 2,1507005  | 0,00205171 | 0,01334996 |
| TRINITY_DN21369_c0_g1_i1 | dmso | control | 0,9289341  | 1,69002704 | 0,00126657 | 0,00905725 |
| TRINITY_DN1829_c0_g1_i1  | dmso | control | 0,92584742 | 3,73507177 | 5,55E-07   | 1,03E-05   |
| TRINITY_DN18375_c0_g1_i1 | dmso | control | 0,92575005 | 4,52764436 | 5,93E-05   | 0,0006667  |
| TRINITY_DN1271_c0_g1_i1  | dmso | control | 0,92435698 | 3,0703589  | 7,33E-05   | 0,00080174 |
| TRINITY_DN6354_c0_g1_i1  | dmso | control | 0,92402324 | 0,38423253 | 0,01359412 | 0,05895137 |

|                          |      |         |            |            |            |            |
|--------------------------|------|---------|------------|------------|------------|------------|
| TRINITY_DN16917_c0_g1_i1 | dmso | control | 0,92392276 | 0,13644023 | 0,02432426 | 0,0915317  |
| TRINITY_DN27400_c0_g1_i1 | dmso | control | 0,92375497 | 0,80430069 | 0,00899662 | 0,04266452 |
| TRINITY_DN589_c0_g1_i1   | dmso | control | 0,92278477 | 4,38846926 | 4,89E-07   | 9,16E-06   |
| TRINITY_DN12358_c0_g1_i1 | dmso | control | 0,92250427 | 0,74991838 | 0,00895045 | 0,04254333 |
| TRINITY_DN5957_c0_g1_i1  | dmso | control | 0,92225283 | 5,18918858 | 2,93E-06   | 4,60E-05   |
| TRINITY_DN12949_c0_g1_i1 | dmso | control | 0,92129123 | 3,56849655 | 0,00021638 | 0,00201657 |
| TRINITY_DN19561_c0_g1_i1 | dmso | control | 0,92103273 | 2,74192916 | 0,00017291 | 0,00166399 |
| TRINITY_DN16620_c0_g1_i1 | dmso | control | 0,92096747 | 2,76067619 | 3,74E-05   | 0,00044395 |
| TRINITY_DN32964_c0_g1_i1 | dmso | control | 0,92037182 | 4,31209703 | 0,00037622 | 0,0032464  |
| TRINITY_DN11234_c0_g1_i1 | dmso | control | 0,91951124 | 5,61731246 | 8,67E-10   | 2,75E-08   |
| TRINITY_DN10829_c0_g1_i1 | dmso | control | 0,9191968  | 3,78965307 | 1,43E-06   | 2,43E-05   |
| TRINITY_DN25358_c0_g1_i1 | dmso | control | 0,91903317 | 1,62760182 | 0,00251974 | 0,01573615 |
| TRINITY_DN11941_c0_g1_i1 | dmso | control | 0,91882036 | 1,42304039 | 0,00518023 | 0,02771422 |
| TRINITY_DN7273_c0_g1_i1  | dmso | control | 0,91846574 | 2,93708713 | 2,79E-05   | 0,00034211 |
| TRINITY_DN20389_c0_g1_i1 | dmso | control | 0,91842545 | 1,64705382 | 0,00486214 | 0,0263937  |
| TRINITY_DN18762_c0_g1_i1 | dmso | control | 0,91696898 | 6,28254656 | 2,26E-13   | 1,28E-11   |
| TRINITY_DN19679_c0_g1_i1 | dmso | control | 0,91651729 | 2,60267882 | 0,00012167 | 0,00123771 |
| TRINITY_DN5820_c0_g1_i1  | dmso | control | 0,91624776 | 8,45502538 | 4,79E-10   | 1,58E-08   |
| TRINITY_DN23459_c0_g1_i1 | dmso | control | 0,91602426 | 2,41827654 | 0,00151703 | 0,01047488 |
| TRINITY_DN5049_c0_g1_i1  | dmso | control | 0,91368978 | 6,61653128 | 1,22E-13   | 6,99E-12   |
| TRINITY_DN2088_c0_g1_i1  | dmso | control | 0,9119619  | 2,80077263 | 7,63E-05   | 0,00082843 |
| TRINITY_DN15628_c0_g1_i1 | dmso | control | 0,91173336 | 1,37355239 | 0,00504484 | 0,02711036 |
| TRINITY_DN33674_c0_g1_i1 | dmso | control | 0,91148158 | 3,92113009 | 3,15E-07   | 6,17E-06   |
| TRINITY_DN6289_c0_g1_i1  | dmso | control | 0,9109476  | 4,65193353 | 3,72E-09   | 1,04E-07   |
| TRINITY_DN33078_c0_g1_i1 | dmso | control | 0,91094615 | 3,29073334 | 8,27E-05   | 0,0008851  |
| TRINITY_DN22381_c0_g1_i1 | dmso | control | 0,91094485 | 3,76676102 | 8,66E-06   | 0,00012238 |
| TRINITY_DN10395_c0_g1_i1 | dmso | control | 0,91089548 | 2,884604   | 0,00053265 | 0,00438022 |
| TRINITY_DN4834_c0_g1_i1  | dmso | control | 0,91032496 | 2,66804636 | 0,00114044 | 0,00826992 |
| TRINITY_DN15082_c0_g1_i1 | dmso | control | 0,90731381 | 1,46367574 | 0,00365582 | 0,02116463 |
| TRINITY_DN8164_c0_g1_i1  | dmso | control | 0,9072843  | 3,2795898  | 8,26E-06   | 0,0001176  |
| TRINITY_DN12805_c0_g1_i1 | dmso | control | 0,90649152 | 2,46447287 | 0,00061206 | 0,0049145  |

|                          |      |         |            |            |            |            |
|--------------------------|------|---------|------------|------------|------------|------------|
| TRINITY_DN15495_c0_g1_i1 | dmso | control | 0,90475531 | 0,94977483 | 0,00761204 | 0,03750202 |
| TRINITY_DN5060_c0_g1_i1  | dmso | control | 0,90469598 | 1,94806131 | 0,00426896 | 0,02382734 |
| TRINITY_DN2038_c0_g1_i1  | dmso | control | 0,9028432  | 3,71316804 | 1,67E-06   | 2,79E-05   |
| TRINITY_DN26547_c0_g1_i1 | dmso | control | 0,90092137 | 0,10970861 | 0,02537833 | 0,09460386 |
| TRINITY_DN18940_c0_g1_i1 | dmso | control | 0,9007095  | 5,53829662 | 1,07E-11   | 4,66E-10   |
| TRINITY_DN8493_c0_g1_i1  | dmso | control | 0,899749   | 0,80801269 | 0,01152022 | 0,05192185 |
| TRINITY_DN2226_c0_g1_i1  | dmso | control | 0,89943389 | 5,42066818 | 3,84E-11   | 1,52E-09   |
| TRINITY_DN8366_c0_g1_i1  | dmso | control | 0,89934556 | 1,90612537 | 0,00274999 | 0,01685038 |
| TRINITY_DN36418_c0_g1_i1 | dmso | control | 0,89838953 | 0,76232053 | 0,01358816 | 0,05894325 |
| TRINITY_DN2917_c0_g1_i1  | dmso | control | 0,89824425 | 1,36123424 | 0,00464314 | 0,02549226 |
| TRINITY_DN2240_c0_g1_i1  | dmso | control | 0,89689245 | 6,34882861 | 4,61E-12   | 2,08E-10   |
| TRINITY_DN810_c0_g1_i1   | dmso | control | 0,89648639 | 5,87215108 | 2,92E-09   | 8,38E-08   |
| TRINITY_DN10063_c0_g1_i1 | dmso | control | 0,89621355 | 1,06201457 | 0,01487845 | 0,0629892  |
| TRINITY_DN2523_c0_g1_i1  | dmso | control | 0,89566201 | 2,87432144 | 0,00020204 | 0,00190007 |
| TRINITY_DN7132_c0_g1_i1  | dmso | control | 0,89506869 | 3,41553559 | 1,10E-05   | 0,00015331 |
| TRINITY_DN1838_c0_g1_i1  | dmso | control | 0,89454473 | 4,61745507 | 3,65E-08   | 8,66E-07   |
| TRINITY_DN1118_c0_g1_i1  | dmso | control | 0,89340913 | 4,15279275 | 7,94E-05   | 0,00085771 |
| TRINITY_DN13558_c0_g1_i1 | dmso | control | 0,89333764 | 1,74862189 | 0,0201525  | 0,07972521 |
| TRINITY_DN25381_c0_g1_i1 | dmso | control | 0,89172016 | 1,56724297 | 0,01104918 | 0,05025435 |
| TRINITY_DN27449_c0_g1_i1 | dmso | control | 0,8911641  | 0,70091939 | 0,01148503 | 0,05177942 |
| TRINITY_DN1012_c0_g1_i1  | dmso | control | 0,88957485 | 5,19525337 | 6,05E-09   | 1,64E-07   |
| TRINITY_DN8712_c0_g1_i1  | dmso | control | 0,88848424 | 0,43174254 | 0,02632431 | 0,09717728 |
| TRINITY_DN23174_c0_g1_i1 | dmso | control | 0,8884637  | 2,09508285 | 0,00060701 | 0,00488482 |
| TRINITY_DN4926_c0_g1_i1  | dmso | control | 0,8883671  | 6,38973093 | 0,00010863 | 0,00112162 |
| TRINITY_DN19024_c0_g1_i1 | dmso | control | 0,88726887 | 5,82944712 | 2,89E-06   | 4,54E-05   |
| TRINITY_DN33371_c0_g1_i1 | dmso | control | 0,88669609 | 3,57023465 | 3,18E-05   | 0,00038395 |
| TRINITY_DN1211_c0_g1_i1  | dmso | control | 0,88664596 | 4,80684632 | 5,13E-08   | 1,19E-06   |
| TRINITY_DN23381_c0_g1_i1 | dmso | control | 0,88660963 | 1,4283297  | 0,01555382 | 0,06512318 |
| TRINITY_DN5181_c0_g1_i1  | dmso | control | 0,88605391 | 5,08561292 | 1,92E-07   | 4,00E-06   |
| TRINITY_DN53404_c0_g1_i1 | dmso | control | 0,88451219 | 1,56318794 | 0,01364795 | 0,05909612 |
| TRINITY_DN1942_c0_g1_i1  | dmso | control | 0,88441928 | 8,08956635 | 1,29E-12   | 6,56E-11   |

|                          |      |         |            |            |            |            |
|--------------------------|------|---------|------------|------------|------------|------------|
| TRINITY_DN5822_c0_g1_i1  | dmso | control | 0,88299862 | 3,96383577 | 0,00114005 | 0,00826992 |
| TRINITY_DN34606_c0_g1_i1 | dmso | control | 0,88297179 | 1,90180304 | 0,00113636 | 0,00825597 |
| TRINITY_DN2469_c0_g1_i1  | dmso | control | 0,88210449 | 2,76996324 | 0,00011136 | 0,00114821 |
| TRINITY_DN1021_c0_g1_i1  | dmso | control | 0,88176641 | 4,83147138 | 1,34E-08   | 3,47E-07   |
| TRINITY_DN2414_c0_g1_i1  | dmso | control | 0,88097497 | 2,3212104  | 0,00173482 | 0,01168275 |
| TRINITY_DN32716_c0_g1_i1 | dmso | control | 0,88083408 | 2,29769811 | 0,00086113 | 0,00655493 |
| TRINITY_DN17399_c0_g1_i1 | dmso | control | 0,88004678 | 2,88555193 | 0,00013904 | 0,00138799 |
| TRINITY_DN2617_c0_g1_i1  | dmso | control | 0,87998879 | 6,21313996 | 8,15E-12   | 3,59E-10   |
| TRINITY_DN21121_c0_g1_i1 | dmso | control | 0,87958898 | 2,2001368  | 0,00132779 | 0,0094019  |
| TRINITY_DN17986_c0_g1_i1 | dmso | control | 0,87957153 | 0,50918298 | 0,01596373 | 0,06662699 |
| TRINITY_DN20664_c0_g1_i1 | dmso | control | 0,87867501 | 3,07799161 | 0,00013112 | 0,00131676 |
| TRINITY_DN138_c0_g1_i1   | dmso | control | 0,87794258 | 4,82323963 | 6,90E-07   | 1,25E-05   |
| TRINITY_DN5424_c0_g1_i1  | dmso | control | 0,87760906 | 4,83463836 | 1,21E-07   | 2,65E-06   |
| TRINITY_DN17338_c0_g1_i1 | dmso | control | 0,87680707 | 0,83757445 | 0,01432622 | 0,061099   |
| TRINITY_DN20229_c0_g1_i1 | dmso | control | 0,87656712 | 1,30866777 | 0,0055322  | 0,02922921 |
| TRINITY_DN31288_c0_g1_i1 | dmso | control | 0,8764256  | 0,23527352 | 0,02604932 | 0,09643323 |
| TRINITY_DN3675_c0_g1_i1  | dmso | control | 0,8761599  | 2,49432698 | 0,00107953 | 0,00791964 |
| TRINITY_DN10687_c0_g1_i1 | dmso | control | 0,87613333 | 5,2087068  | 2,81E-07   | 5,57E-06   |
| TRINITY_DN14059_c0_g1_i1 | dmso | control | 0,87583574 | 1,20441386 | 0,00460944 | 0,02537478 |
| TRINITY_DN24725_c0_g1_i1 | dmso | control | 0,87567331 | 4,5314234  | 4,46E-07   | 8,49E-06   |
| TRINITY_DN6632_c0_g1_i1  | dmso | control | 0,87477543 | 3,57993936 | 2,87E-05   | 0,00035148 |
| TRINITY_DN33792_c0_g1_i1 | dmso | control | 0,87413111 | 2,78334122 | 0,00010591 | 0,00109747 |
| TRINITY_DN2918_c0_g1_i1  | dmso | control | 0,8737077  | 4,34374778 | 6,05E-07   | 1,11E-05   |
| TRINITY_DN22732_c0_g1_i1 | dmso | control | 0,8735184  | 2,43725552 | 0,00221759 | 0,01419908 |
| TRINITY_DN8265_c0_g1_i1  | dmso | control | 0,87171118 | 2,70519134 | 0,00014831 | 0,00146538 |
| TRINITY_DN20969_c0_g1_i1 | dmso | control | 0,87055457 | 1,20216852 | 0,00611032 | 0,03157909 |
| TRINITY_DN2461_c0_g1_i1  | dmso | control | 0,86992543 | 3,83172227 | 1,55E-05   | 0,00020541 |
| TRINITY_DN1871_c0_g1_i1  | dmso | control | 0,86975097 | 2,32116162 | 0,0049069  | 0,0266067  |
| TRINITY_DN2375_c0_g1_i1  | dmso | control | 0,86954229 | 3,55258585 | 1,15E-05   | 0,00015976 |
| TRINITY_DN16788_c0_g1_i1 | dmso | control | 0,86888095 | 2,52330534 | 0,00023787 | 0,00218977 |
| TRINITY_DN28948_c0_g1_i1 | dmso | control | 0,8687346  | 1,79411633 | 0,0019169  | 0,01265525 |

|                          |      |         |            |            |            |            |
|--------------------------|------|---------|------------|------------|------------|------------|
| TRINITY_DN22609_c0_g1_i1 | dmso | control | 0,86836391 | 2,6202298  | 0,00027084 | 0,00245438 |
| TRINITY_DN19346_c0_g1_i1 | dmso | control | 0,86734543 | 3,45466749 | 3,45E-05   | 0,0004143  |
| TRINITY_DN13178_c0_g1_i1 | dmso | control | 0,86704658 | 4,8133148  | 1,84E-06   | 3,03E-05   |
| TRINITY_DN5275_c0_g1_i1  | dmso | control | 0,86621212 | 4,4380622  | 2,65E-07   | 5,31E-06   |
| TRINITY_DN4088_c0_g1_i1  | dmso | control | 0,86598776 | 4,55881743 | 2,74E-05   | 0,00033806 |
| TRINITY_DN9227_c0_g1_i1  | dmso | control | 0,86517749 | 2,5349355  | 0,00047333 | 0,0039527  |
| TRINITY_DN11978_c0_g1_i1 | dmso | control | 0,86435964 | 5,65483547 | 2,45E-11   | 1,00E-09   |
| TRINITY_DN42870_c0_g1_i1 | dmso | control | 0,86429313 | 3,70276766 | 1,49E-05   | 0,00019853 |
| TRINITY_DN23051_c0_g1_i1 | dmso | control | 0,86373296 | 1,503239   | 0,00448372 | 0,02483409 |
| TRINITY_DN21667_c0_g1_i1 | dmso | control | 0,86331439 | 3,06968495 | 5,80E-05   | 0,00065474 |
| TRINITY_DN31509_c0_g1_i1 | dmso | control | 0,86327551 | 0,62095681 | 0,02423848 | 0,09134485 |
| TRINITY_DN7756_c0_g1_i1  | dmso | control | 0,86297745 | 3,15524905 | 3,17E-05   | 0,00038389 |
| TRINITY_DN22927_c0_g1_i1 | dmso | control | 0,86205756 | 2,61780438 | 0,00261433 | 0,0161938  |
| TRINITY_DN14583_c0_g1_i1 | dmso | control | 0,86202498 | 0,68537944 | 0,01539847 | 0,06467895 |
| TRINITY_DN449_c0_g1_i1   | dmso | control | 0,86147326 | 6,66585891 | 2,94E-11   | 1,18E-09   |
| TRINITY_DN9890_c0_g1_i1  | dmso | control | 0,86114694 | 1,16604605 | 0,01146343 | 0,05172348 |
| TRINITY_DN7691_c0_g1_i1  | dmso | control | 0,86084205 | 2,88876314 | 0,00073749 | 0,0057511  |
| TRINITY_DN19430_c0_g1_i1 | dmso | control | 0,86023453 | 5,22788466 | 2,18E-09   | 6,49E-08   |
| TRINITY_DN10276_c0_g1_i1 | dmso | control | 0,85996104 | 4,41497051 | 1,64E-07   | 3,46E-06   |
| TRINITY_DN7375_c0_g1_i1  | dmso | control | 0,85874572 | 4,11066109 | 4,56E-06   | 6,85E-05   |
| TRINITY_DN1746_c0_g1_i1  | dmso | control | 0,85845233 | 5,51722083 | 3,04E-07   | 5,98E-06   |
| TRINITY_DN12315_c0_g1_i1 | dmso | control | 0,8577428  | 0,66497505 | 0,02498532 | 0,09344707 |
| TRINITY_DN8702_c0_g1_i1  | dmso | control | 0,85712229 | 3,28277912 | 0,00047597 | 0,00396507 |
| TRINITY_DN25465_c0_g1_i1 | dmso | control | 0,85687843 | 4,25049837 | 7,00E-07   | 1,27E-05   |
| TRINITY_DN30641_c0_g1_i1 | dmso | control | 0,85559705 | 2,57551368 | 0,00029463 | 0,00264183 |
| TRINITY_DN12275_c0_g1_i1 | dmso | control | 0,85415675 | 3,46719766 | 5,07E-05   | 0,00057985 |
| TRINITY_DN12308_c0_g1_i1 | dmso | control | 0,85400982 | 4,41177317 | 8,25E-07   | 1,47E-05   |
| TRINITY_DN22083_c0_g1_i1 | dmso | control | 0,8536384  | 7,86727002 | 1,27E-12   | 6,51E-11   |
| TRINITY_DN23534_c0_g1_i1 | dmso | control | 0,8534853  | 3,15807144 | 0,00139536 | 0,00977497 |
| TRINITY_DN10454_c0_g1_i1 | dmso | control | 0,85340534 | 1,52260111 | 0,00358423 | 0,02084308 |
| TRINITY_DN2093_c0_g1_i1  | dmso | control | 0,85302057 | 5,77520626 | 1,13E-07   | 2,49E-06   |

|                          |      |         |            |            |            |            |
|--------------------------|------|---------|------------|------------|------------|------------|
| TRINITY_DN22554_c0_g1_i1 | dmso | control | 0,85186648 | 1,50833335 | 0,00662873 | 0,03360898 |
| TRINITY_DN26671_c0_g1_i1 | dmso | control | 0,85016458 | 1,21391415 | 0,00825799 | 0,04001563 |
| TRINITY_DN14674_c0_g1_i1 | dmso | control | 0,85012776 | 1,96421373 | 0,00571624 | 0,02999395 |
| TRINITY_DN7959_c0_g1_i1  | dmso | control | 0,85008084 | 3,20920824 | 0,0002222  | 0,00206412 |
| TRINITY_DN13251_c0_g1_i1 | dmso | control | 0,84981373 | 2,14342288 | 0,00171729 | 0,01159169 |
| TRINITY_DN3154_c0_g1_i1  | dmso | control | 0,84978511 | 3,32504519 | 6,08E-05   | 0,00068206 |
| TRINITY_DN13873_c0_g1_i1 | dmso | control | 0,84903478 | 1,62231121 | 0,01983643 | 0,07878116 |
| TRINITY_DN21192_c0_g1_i1 | dmso | control | 0,84800151 | 2,06943005 | 0,00885798 | 0,04220265 |
| TRINITY_DN2061_c0_g1_i1  | dmso | control | 0,84795498 | 2,69825516 | 0,01790492 | 0,07275289 |
| TRINITY_DN19546_c0_g1_i1 | dmso | control | 0,84672582 | 2,8857871  | 0,00014244 | 0,00141609 |
| TRINITY_DN296_c0_g1_i1   | dmso | control | 0,84602221 | 4,46879172 | 4,87E-05   | 0,000561   |
| TRINITY_DN2034_c0_g1_i1  | dmso | control | 0,84477636 | 6,0823093  | 1,77E-11   | 7,44E-10   |
| TRINITY_DN13287_c0_g1_i1 | dmso | control | 0,84344431 | 2,99222205 | 8,99E-05   | 0,00095236 |
| TRINITY_DN7257_c0_g1_i1  | dmso | control | 0,84320866 | 3,53163923 | 3,74E-05   | 0,00044395 |
| TRINITY_DN21749_c0_g1_i1 | dmso | control | 0,84257357 | 1,6806754  | 0,00890282 | 0,04235879 |
| TRINITY_DN13562_c0_g1_i1 | dmso | control | 0,84204354 | 1,5941657  | 0,00379807 | 0,02177106 |
| TRINITY_DN46489_c0_g1_i1 | dmso | control | 0,84152537 | 0,66778324 | 0,01738912 | 0,07113732 |
| TRINITY_DN13637_c0_g1_i1 | dmso | control | 0,84065061 | 2,38296014 | 0,00895944 | 0,04257209 |
| TRINITY_DN9003_c0_g1_i1  | dmso | control | 0,84056837 | 3,55881102 | 1,30E-05   | 0,00017638 |
| TRINITY_DN12263_c0_g1_i1 | dmso | control | 0,8403307  | 3,72648911 | 0,00041785 | 0,00355256 |
| TRINITY_DN19317_c0_g1_i1 | dmso | control | 0,83980768 | 4,8134182  | 0,00030563 | 0,0027252  |
| TRINITY_DN3760_c0_g1_i1  | dmso | control | 0,83951985 | 3,70814862 | 1,51E-05   | 0,00020116 |
| TRINITY_DN1562_c0_g1_i1  | dmso | control | 0,83930163 | 4,93997948 | 1,29E-05   | 0,00017604 |
| TRINITY_DN32745_c0_g1_i1 | dmso | control | 0,83929505 | 3,41061072 | 0,0002291  | 0,0021241  |
| TRINITY_DN5920_c0_g1_i1  | dmso | control | 0,83900519 | 4,35388084 | 5,16E-07   | 9,61E-06   |
| TRINITY_DN8367_c0_g1_i1  | dmso | control | 0,83849245 | 2,73194461 | 0,00019547 | 0,00184786 |
| TRINITY_DN6601_c0_g1_i1  | dmso | control | 0,83817272 | 2,51856584 | 0,01823412 | 0,07379992 |
| TRINITY_DN7079_c0_g1_i1  | dmso | control | 0,83618593 | 2,25148577 | 0,00287797 | 0,01750154 |
| TRINITY_DN1545_c0_g1_i1  | dmso | control | 0,83588584 | 5,38874076 | 2,98E-08   | 7,17E-07   |
| TRINITY_DN8311_c0_g1_i1  | dmso | control | 0,83554229 | 2,86698013 | 0,00365412 | 0,02116429 |
| TRINITY_DN20906_c0_g1_i1 | dmso | control | 0,835218   | 3,07606975 | 8,92E-05   | 0,00094587 |

|                          |      |         |            |            |            |            |
|--------------------------|------|---------|------------|------------|------------|------------|
| TRINITY_DN17092_c0_g1_i1 | dmso | control | 0,83496187 | 1,01952754 | 0,01993633 | 0,07902951 |
| TRINITY_DN18858_c0_g1_i1 | dmso | control | 0,83474204 | 6,81881167 | 9,41E-13   | 4,94E-11   |
| TRINITY_DN2773_c0_g1_i1  | dmso | control | 0,834667   | 3,05109633 | 0,00036079 | 0,00313237 |
| TRINITY_DN11550_c0_g1_i1 | dmso | control | 0,83453849 | 4,63336843 | 1,35E-06   | 2,30E-05   |
| TRINITY_DN2050_c0_g1_i1  | dmso | control | 0,8338299  | 4,34876371 | 7,73E-05   | 0,00083855 |
| TRINITY_DN120_c0_g1_i1   | dmso | control | 0,83350526 | 7,62524859 | 9,44E-05   | 0,00099572 |
| TRINITY_DN3503_c0_g1_i1  | dmso | control | 0,83334094 | 4,04646521 | 0,00057691 | 0,00467911 |
| TRINITY_DN27161_c0_g1_i1 | dmso | control | 0,83291552 | 1,63960426 | 0,00426331 | 0,02380501 |
| TRINITY_DN1445_c0_g1_i1  | dmso | control | 0,83272954 | 7,36662413 | 7,92E-05   | 0,00085693 |
| TRINITY_DN15054_c0_g1_i1 | dmso | control | 0,83243409 | 2,43106933 | 0,00095165 | 0,0070822  |
| TRINITY_DN34367_c0_g1_i1 | dmso | control | 0,83231806 | 4,63324785 | 4,29E-07   | 8,21E-06   |
| TRINITY_DN33017_c0_g1_i1 | dmso | control | 0,83189428 | 4,94245143 | 7,26E-08   | 1,65E-06   |
| TRINITY_DN8858_c0_g1_i1  | dmso | control | 0,83161537 | 1,00095125 | 0,0129499  | 0,05696143 |
| TRINITY_DN6815_c0_g1_i1  | dmso | control | 0,83080455 | 2,63836505 | 0,00078428 | 0,00606796 |
| TRINITY_DN23463_c0_g1_i1 | dmso | control | 0,83071269 | 2,5623916  | 0,00080435 | 0,00619013 |
| TRINITY_DN1822_c0_g1_i1  | dmso | control | 0,82976002 | 5,47738167 | 7,70E-10   | 2,47E-08   |
| TRINITY_DN13594_c0_g1_i1 | dmso | control | 0,82939544 | 2,3689515  | 0,0033047  | 0,01956407 |
| TRINITY_DN6917_c0_g1_i1  | dmso | control | 0,82864392 | 4,74540368 | 4,39E-06   | 6,62E-05   |
| TRINITY_DN6925_c0_g1_i1  | dmso | control | 0,82863918 | 3,32643861 | 3,18E-05   | 0,00038409 |
| TRINITY_DN3603_c0_g1_i1  | dmso | control | 0,82855813 | 1,32997972 | 0,0086211  | 0,04133147 |
| TRINITY_DN27749_c0_g1_i1 | dmso | control | 0,8282682  | 0,64721086 | 0,02250965 | 0,0865226  |
| TRINITY_DN14598_c0_g1_i1 | dmso | control | 0,82734535 | 3,33602218 | 7,10E-05   | 0,00077996 |
| TRINITY_DN25822_c0_g1_i1 | dmso | control | 0,8271599  | 2,04646163 | 0,00473674 | 0,02587831 |
| TRINITY_DN20419_c0_g1_i1 | dmso | control | 0,82675302 | 2,94488649 | 0,00013117 | 0,00131676 |
| TRINITY_DN8051_c0_g1_i1  | dmso | control | 0,82655626 | 2,20880663 | 0,0087586  | 0,04183979 |
| TRINITY_DN15094_c0_g1_i1 | dmso | control | 0,82602088 | 1,09657692 | 0,01841695 | 0,07435238 |
| TRINITY_DN20230_c0_g1_i1 | dmso | control | 0,82511512 | 5,0841265  | 2,40E-07   | 4,86E-06   |
| TRINITY_DN15436_c0_g1_i1 | dmso | control | 0,82495593 | 1,00183389 | 0,01320969 | 0,05775241 |
| TRINITY_DN22515_c0_g1_i1 | dmso | control | 0,8228965  | 0,64204762 | 0,02186031 | 0,08465744 |
| TRINITY_DN22795_c0_g1_i1 | dmso | control | 0,82221005 | 2,91925294 | 0,0022155  | 0,01419195 |
| TRINITY_DN854_c0_g1_i1   | dmso | control | 0,82217667 | 4,22154765 | 5,87E-05   | 0,00066106 |



|                          |      |         |            |            |            |            |
|--------------------------|------|---------|------------|------------|------------|------------|
| TRINITY_DN35647_c0_g1_i1 | dmso | control | 0,8221464  | 3,42000121 | 0,00077324 | 0,00598577 |
| TRINITY_DN2384_c0_g1_i1  | dmso | control | 0,82179586 | 3,52920013 | 2,06E-05   | 0,00026341 |
| TRINITY_DN3688_c0_g1_i1  | dmso | control | 0,82022555 | 1,75876864 | 0,01494146 | 0,0631819  |
| TRINITY_DN10267_c0_g1_i1 | dmso | control | 0,81683063 | 5,06339847 | 1,30E-08   | 3,36E-07   |
| TRINITY_DN11951_c0_g1_i1 | dmso | control | 0,81679462 | 3,24891186 | 0,00081684 | 0,00626285 |
| TRINITY_DN3069_c0_g1_i1  | dmso | control | 0,81609957 | 2,61929575 | 0,00259924 | 0,01611774 |
| TRINITY_DN36505_c0_g1_i1 | dmso | control | 0,81502128 | 1,02015125 | 0,01639162 | 0,06788329 |
| TRINITY_DN18340_c0_g1_i1 | dmso | control | 0,81373347 | 5,90608936 | 4,76E-10   | 1,57E-08   |
| TRINITY_DN19570_c0_g1_i1 | dmso | control | 0,81284586 | 3,98048209 | 0,00329701 | 0,01953664 |
| TRINITY_DN16194_c0_g1_i1 | dmso | control | 0,81201024 | 1,48513628 | 0,00571253 | 0,02999395 |
| TRINITY_DN33634_c0_g1_i1 | dmso | control | 0,81173526 | 4,59460223 | 1,55E-05   | 0,00020541 |
| TRINITY_DN3072_c0_g1_i1  | dmso | control | 0,81122785 | 4,33141391 | 2,18E-05   | 0,00027551 |
| TRINITY_DN6534_c0_g1_i1  | dmso | control | 0,81099837 | 5,63993761 | 4,61E-07   | 8,72E-06   |
| TRINITY_DN186_c0_g1_i1   | dmso | control | 0,81079737 | 4,31518946 | 7,12E-06   | 0,00010299 |
| TRINITY_DN8419_c0_g1_i1  | dmso | control | 0,81004262 | 0,93206553 | 0,01877748 | 0,07544792 |
| TRINITY_DN38826_c0_g1_i1 | dmso | control | 0,81003449 | 2,86801547 | 0,00090183 | 0,0067743  |
| TRINITY_DN9060_c0_g1_i1  | dmso | control | 0,80928896 | 3,72275751 | 4,01E-05   | 0,00047215 |
| TRINITY_DN15575_c0_g1_i1 | dmso | control | 0,80886    | 1,1592837  | 0,02345865 | 0,0891972  |
| TRINITY_DN26613_c0_g1_i1 | dmso | control | 0,80713861 | 1,23348224 | 0,01686321 | 0,06950809 |
| TRINITY_DN27142_c0_g1_i1 | dmso | control | 0,80653773 | 0,84540226 | 0,01758723 | 0,0718054  |
| TRINITY_DN29499_c0_g1_i1 | dmso | control | 0,80550357 | 0,9243379  | 0,02007922 | 0,07948599 |
| TRINITY_DN6111_c0_g1_i1  | dmso | control | 0,80524544 | 6,10019234 | 1,75E-06   | 2,90E-05   |
| TRINITY_DN10541_c0_g1_i1 | dmso | control | 0,8042603  | 3,14075549 | 0,0002711  | 0,00245521 |
| TRINITY_DN5417_c0_g1_i1  | dmso | control | 0,80321291 | 5,23696124 | 3,31E-08   | 7,89E-07   |
| TRINITY_DN20537_c0_g1_i1 | dmso | control | 0,80278887 | 2,62746464 | 0,02469627 | 0,09261103 |
| TRINITY_DN781_c0_g1_i1   | dmso | control | 0,8021053  | 7,39247837 | 3,49E-07   | 6,78E-06   |
| TRINITY_DN20602_c0_g1_i1 | dmso | control | 0,8018571  | 1,28775423 | 0,01114616 | 0,05058883 |
| TRINITY_DN12388_c0_g1_i1 | dmso | control | 0,80144429 | 2,41858099 | 0,00118076 | 0,00852381 |
| TRINITY_DN33407_c0_g1_i1 | dmso | control | 0,80124589 | 1,64859653 | 0,00669349 | 0,03384232 |
| TRINITY_DN76929_c0_g1_i1 | dmso | control | 0,8005746  | 3,88706606 | 1,28E-05   | 0,00017455 |
| TRINITY_DN10937_c0_g1_i1 | dmso | control | 0,80037698 | 7,00479563 | 2,29E-12   | 1,10E-10   |

|                          |      |         |            |            |            |            |
|--------------------------|------|---------|------------|------------|------------|------------|
| TRINITY_DN33317_c0_g1_i1 | dmso | control | 0,79892093 | 1,80143535 | 0,01251906 | 0,05559109 |
| TRINITY_DN39813_c0_g1_i1 | dmso | control | 0,79854118 | 1,01864948 | 0,01447407 | 0,06156534 |
| TRINITY_DN12580_c0_g1_i1 | dmso | control | 0,79837693 | 3,42625665 | 0,0002562  | 0,0023364  |
| TRINITY_DN33172_c0_g1_i1 | dmso | control | 0,79820601 | 1,99879878 | 0,00352935 | 0,02063499 |
| TRINITY_DN23706_c0_g1_i1 | dmso | control | 0,79782448 | 2,62372357 | 0,00057598 | 0,00467414 |
| TRINITY_DN54100_c0_g1_i1 | dmso | control | 0,79778839 | 1,0708072  | 0,01813413 | 0,07351882 |
| TRINITY_DN15485_c0_g1_i1 | dmso | control | 0,79649546 | 1,46676747 | 0,01570448 | 0,06567781 |
| TRINITY_DN4977_c0_g1_i1  | dmso | control | 0,79632801 | 6,32937446 | 4,62E-09   | 1,28E-07   |
| TRINITY_DN23059_c0_g1_i1 | dmso | control | 0,79483336 | 2,80103825 | 0,00092446 | 0,0069089  |
| TRINITY_DN9095_c0_g1_i1  | dmso | control | 0,79468431 | 3,36696927 | 0,00012665 | 0,00127845 |
| TRINITY_DN20435_c0_g1_i1 | dmso | control | 0,79449719 | 2,71644692 | 0,00333835 | 0,01970678 |
| TRINITY_DN12780_c0_g1_i1 | dmso | control | 0,79436665 | 4,48212969 | 1,27E-06   | 2,17E-05   |
| TRINITY_DN5881_c0_g1_i1  | dmso | control | 0,79426716 | 5,65428594 | 7,55E-08   | 1,70E-06   |
| TRINITY_DN293_c0_g1_i1   | dmso | control | 0,79306852 | 6,08538846 | 1,34E-08   | 3,47E-07   |
| TRINITY_DN34408_c0_g1_i1 | dmso | control | 0,79085331 | 1,93544878 | 0,00423236 | 0,02367792 |
| TRINITY_DN43638_c0_g1_i1 | dmso | control | 0,79032495 | 1,2605035  | 0,02554423 | 0,09502612 |
| TRINITY_DN1789_c0_g1_i1  | dmso | control | 0,79017187 | 1,26946938 | 0,01161558 | 0,05220506 |
| TRINITY_DN19162_c0_g1_i1 | dmso | control | 0,78981419 | 4,22751134 | 2,18E-05   | 0,00027567 |
| TRINITY_DN22660_c0_g1_i1 | dmso | control | 0,78965349 | 3,13563817 | 0,00024538 | 0,00224759 |
| TRINITY_DN8039_c0_g1_i1  | dmso | control | 0,78895246 | 2,14141097 | 0,00295119 | 0,01785919 |
| TRINITY_DN7228_c0_g1_i1  | dmso | control | 0,78890766 | 3,898734   | 1,17E-05   | 0,00016191 |
| TRINITY_DN38596_c0_g1_i1 | dmso | control | 0,78859181 | 1,0003821  | 0,02206715 | 0,08511614 |
| TRINITY_DN13483_c0_g1_i1 | dmso | control | 0,7881575  | 3,07383923 | 0,00021005 | 0,00196509 |
| TRINITY_DN11208_c0_g1_i1 | dmso | control | 0,7861098  | 4,95671043 | 0,00066897 | 0,00530369 |
| TRINITY_DN11675_c0_g1_i1 | dmso | control | 0,78605575 | 3,98924964 | 0,00015182 | 0,00149291 |
| TRINITY_DN40799_c0_g1_i1 | dmso | control | 0,78575025 | 0,69940934 | 0,02394361 | 0,09067161 |
| TRINITY_DN2628_c0_g1_i1  | dmso | control | 0,78519707 | 5,87346573 | 3,41E-07   | 6,64E-06   |
| TRINITY_DN20232_c0_g1_i1 | dmso | control | 0,78454957 | 3,47042409 | 7,93E-05   | 0,00085771 |
| TRINITY_DN33430_c0_g1_i1 | dmso | control | 0,78429778 | 3,18642022 | 0,00011962 | 0,00121937 |
| TRINITY_DN1697_c0_g1_i1  | dmso | control | 0,78354596 | 6,11055073 | 2,91E-06   | 4,56E-05   |
| TRINITY_DN30714_c0_g1_i1 | dmso | control | 0,78337565 | 1,49808814 | 0,00742421 | 0,03676952 |

|                          |      |         |            |            |            |            |
|--------------------------|------|---------|------------|------------|------------|------------|
| TRINITY_DN6087_c0_g1_i1  | dmso | control | 0,78277336 | 5,0360993  | 1,75E-05   | 0,00022871 |
| TRINITY_DN10045_c0_g1_i1 | dmso | control | 0,78249382 | 2,38945958 | 0,00134996 | 0,00952612 |
| TRINITY_DN12625_c0_g1_i1 | dmso | control | 0,78138109 | 3,41124699 | 0,00075657 | 0,00588198 |
| TRINITY_DN11656_c0_g1_i1 | dmso | control | 0,78121976 | 3,67866863 | 0,00035783 | 0,00311222 |
| TRINITY_DN20627_c0_g1_i1 | dmso | control | 0,78061364 | 3,07937028 | 0,00510636 | 0,02740714 |
| TRINITY_DN13941_c0_g1_i1 | dmso | control | 0,78036562 | 1,31870065 | 0,0161965  | 0,06740375 |
| TRINITY_DN23045_c0_g1_i1 | dmso | control | 0,78011166 | 2,03892892 | 0,00356085 | 0,02075726 |
| TRINITY_DN43423_c0_g1_i1 | dmso | control | 0,77996669 | 0,86885151 | 0,02218102 | 0,08547816 |
| TRINITY_DN2180_c0_g1_i1  | dmso | control | 0,77959014 | 3,71688878 | 5,84E-05   | 0,00065891 |
| TRINITY_DN3046_c0_g1_i1  | dmso | control | 0,77859185 | 4,64438261 | 0,00034551 | 0,00302418 |
| TRINITY_DN22068_c0_g1_i1 | dmso | control | 0,77857154 | 4,58766425 | 1,77E-05   | 0,00023072 |
| TRINITY_DN6291_c0_g1_i1  | dmso | control | 0,77784468 | 4,80243458 | 4,47E-07   | 8,50E-06   |
| TRINITY_DN5946_c0_g1_i1  | dmso | control | 0,77776383 | 3,4658246  | 0,00012529 | 0,00126647 |
| TRINITY_DN3193_c0_g1_i1  | dmso | control | 0,77769087 | 4,15107539 | 1,35E-05   | 0,00018274 |
| TRINITY_DN20205_c0_g1_i1 | dmso | control | 0,77644416 | 2,49025639 | 0,00133163 | 0,00941991 |
| TRINITY_DN29991_c0_g1_i1 | dmso | control | 0,77498384 | 1,55991763 | 0,00886586 | 0,04221071 |
| TRINITY_DN12399_c0_g1_i1 | dmso | control | 0,77470254 | 4,30205702 | 0,00034565 | 0,00302418 |
| TRINITY_DN11523_c0_g1_i1 | dmso | control | 0,77449827 | 2,65202539 | 0,00092516 | 0,00690999 |
| TRINITY_DN21986_c0_g1_i1 | dmso | control | 0,77449688 | 1,56127281 | 0,01348296 | 0,05866305 |
| TRINITY_DN32668_c0_g1_i1 | dmso | control | 0,77369279 | 2,74495064 | 0,00079417 | 0,00612481 |
| TRINITY_DN6665_c0_g1_i1  | dmso | control | 0,77356481 | 4,34495438 | 8,00E-06   | 0,00011422 |
| TRINITY_DN21792_c0_g1_i1 | dmso | control | 0,77334507 | 6,81766089 | 1,50E-11   | 6,35E-10   |
| TRINITY_DN3632_c0_g1_i1  | dmso | control | 0,77291701 | 3,5128114  | 8,07E-05   | 0,00086919 |
| TRINITY_DN276_c0_g1_i1   | dmso | control | 0,77206301 | 5,62552805 | 4,58E-09   | 1,27E-07   |
| TRINITY_DN78375_c0_g1_i1 | dmso | control | 0,77198709 | 2,03666182 | 0,00801701 | 0,03908913 |
| TRINITY_DN22610_c0_g1_i1 | dmso | control | 0,77088597 | 2,0571348  | 0,01040844 | 0,04793855 |
| TRINITY_DN8149_c0_g1_i1  | dmso | control | 0,77069421 | 1,07714164 | 0,02027886 | 0,0800565  |
| TRINITY_DN5598_c0_g1_i1  | dmso | control | 0,77061693 | 4,98626711 | 5,94E-05   | 0,00066749 |
| TRINITY_DN180_c0_g1_i1   | dmso | control | 0,77041834 | 6,16575275 | 3,53E-09   | 9,94E-08   |
| TRINITY_DN23682_c0_g1_i1 | dmso | control | 0,77010674 | 1,23783962 | 0,02228896 | 0,08583419 |
| TRINITY_DN20473_c0_g1_i1 | dmso | control | 0,76944879 | 5,31476565 | 1,65E-07   | 3,47E-06   |

|                          |      |         |            |            |            |            |
|--------------------------|------|---------|------------|------------|------------|------------|
| TRINITY_DN6619_c0_g1_i1  | dmso | control | 0,76929941 | 1,75462763 | 0,00548693 | 0,02904091 |
| TRINITY_DN5197_c0_g1_i1  | dmso | control | 0,76766313 | 5,92568979 | 2,60E-09   | 7,63E-08   |
| TRINITY_DN34973_c0_g1_i1 | dmso | control | 0,76722993 | 2,48247604 | 0,00373235 | 0,02150533 |
| TRINITY_DN11010_c0_g1_i1 | dmso | control | 0,76695666 | 4,79960769 | 8,83E-07   | 1,56E-05   |
| TRINITY_DN11268_c0_g1_i1 | dmso | control | 0,76675277 | 3,93090436 | 1,72E-05   | 0,00022475 |
| TRINITY_DN12073_c0_g1_i1 | dmso | control | 0,76609503 | 3,58302872 | 0,00011896 | 0,00121352 |
| TRINITY_DN6761_c0_g1_i1  | dmso | control | 0,76492046 | 4,17977881 | 0,02576179 | 0,09564617 |
| TRINITY_DN7076_c0_g1_i1  | dmso | control | 0,7647673  | 4,10485588 | 8,16E-05   | 0,00087768 |
| TRINITY_DN7642_c0_g1_i1  | dmso | control | 0,76446776 | 2,90474388 | 0,00540446 | 0,02870127 |
| TRINITY_DN23347_c0_g1_i1 | dmso | control | 0,7639473  | 2,87633935 | 0,01004809 | 0,04659897 |
| TRINITY_DN34034_c0_g1_i1 | dmso | control | 0,7636005  | 1,9106395  | 0,00649173 | 0,03306523 |
| TRINITY_DN6247_c0_g1_i1  | dmso | control | 0,76336795 | 4,97515951 | 7,77E-05   | 0,00084128 |
| TRINITY_DN5666_c0_g1_i1  | dmso | control | 0,76295741 | 2,89833458 | 0,00342537 | 0,02011519 |
| TRINITY_DN654_c0_g1_i1   | dmso | control | 0,76290406 | 4,8037147  | 0,00033049 | 0,00292001 |
| TRINITY_DN12972_c0_g1_i1 | dmso | control | 0,76267054 | 4,23774529 | 2,88E-05   | 0,00035171 |
| TRINITY_DN9115_c0_g1_i1  | dmso | control | 0,7609522  | 1,97338733 | 0,02127537 | 0,08292571 |
| TRINITY_DN32767_c0_g1_i1 | dmso | control | 0,7604028  | 1,42839867 | 0,01385385 | 0,05968354 |
| TRINITY_DN7908_c0_g1_i1  | dmso | control | 0,76010673 | 4,18110265 | 1,00E-05   | 0,00014038 |
| TRINITY_DN2483_c0_g1_i1  | dmso | control | 0,75961308 | 3,10001196 | 0,00044254 | 0,00372302 |
| TRINITY_DN9930_c0_g1_i1  | dmso | control | 0,75938839 | 3,26292515 | 0,00013951 | 0,00139173 |
| TRINITY_DN20676_c0_g1_i1 | dmso | control | 0,75915225 | 2,3609903  | 0,02025093 | 0,07997263 |
| TRINITY_DN1845_c0_g1_i1  | dmso | control | 0,75827976 | 4,08755893 | 1,80E-05   | 0,0002335  |
| TRINITY_DN11178_c0_g1_i1 | dmso | control | 0,75802804 | 4,72794659 | 9,21E-06   | 0,00012926 |
| TRINITY_DN19603_c0_g1_i1 | dmso | control | 0,75787248 | 3,21861352 | 0,00049233 | 0,00408013 |
| TRINITY_DN15207_c0_g1_i1 | dmso | control | 0,75785518 | 2,67887323 | 0,00510765 | 0,02740714 |
| TRINITY_DN22594_c0_g1_i1 | dmso | control | 0,7569249  | 1,21433416 | 0,01702712 | 0,06996108 |
| TRINITY_DN19377_c0_g1_i1 | dmso | control | 0,75636824 | 4,21807825 | 1,11E-05   | 0,00015436 |
| TRINITY_DN11630_c0_g1_i1 | dmso | control | 0,75597946 | 5,35100962 | 2,43E-05   | 0,0003025  |
| TRINITY_DN6657_c0_g1_i1  | dmso | control | 0,75465755 | 1,9685631  | 0,00747911 | 0,03696057 |
| TRINITY_DN6246_c0_g1_i1  | dmso | control | 0,75432609 | 4,57308077 | 1,70E-06   | 2,83E-05   |
| TRINITY_DN8451_c0_g1_i1  | dmso | control | 0,7540999  | 3,77333663 | 0,00194308 | 0,0127523  |

|                          |      |         |            |            |            |            |
|--------------------------|------|---------|------------|------------|------------|------------|
| TRINITY_DN13756_c0_g1_i1 | dmso | control | 0,75396405 | 1,76780421 | 0,01355077 | 0,0588864  |
| TRINITY_DN37220_c0_g1_i1 | dmso | control | 0,7537703  | 2,65384847 | 0,0068914  | 0,03461275 |
| TRINITY_DN20544_c0_g1_i1 | dmso | control | 0,75307432 | 3,38005375 | 0,00165116 | 0,01120291 |
| TRINITY_DN6408_c0_g1_i1  | dmso | control | 0,7514384  | 5,62335983 | 1,92E-06   | 3,15E-05   |
| TRINITY_DN20677_c0_g1_i1 | dmso | control | 0,75060416 | 3,77404051 | 0,00088942 | 0,00670895 |
| TRINITY_DN6117_c0_g1_i1  | dmso | control | 0,75038248 | 5,04207988 | 2,01E-07   | 4,15E-06   |
| TRINITY_DN344_c0_g1_i1   | dmso | control | 0,75004228 | 6,61399762 | 8,39E-07   | 1,49E-05   |
| TRINITY_DN19752_c0_g1_i1 | dmso | control | 0,74968712 | 2,00445942 | 0,01145264 | 0,05171411 |
| TRINITY_DN2018_c0_g1_i1  | dmso | control | 0,74960075 | 5,04071885 | 3,82E-06   | 5,80E-05   |
| TRINITY_DN6939_c0_g1_i1  | dmso | control | 0,74950227 | 5,49380025 | 2,09E-08   | 5,19E-07   |
| TRINITY_DN12268_c0_g1_i1 | dmso | control | 0,74858816 | 6,67047073 | 3,45E-10   | 1,17E-08   |
| TRINITY_DN4681_c0_g1_i1  | dmso | control | 0,74744303 | 2,94540481 | 0,00072279 | 0,00565584 |
| TRINITY_DN5714_c0_g1_i1  | dmso | control | 0,74730192 | 3,35108362 | 0,00048251 | 0,00400833 |
| TRINITY_DN15966_c0_g1_i1 | dmso | control | 0,74518398 | 2,83941139 | 0,00129605 | 0,00923146 |
| TRINITY_DN15868_c0_g1_i1 | dmso | control | 0,74435713 | 1,56813139 | 0,00952907 | 0,04473473 |
| TRINITY_DN2472_c0_g1_i1  | dmso | control | 0,74375031 | 3,52629717 | 0,00016186 | 0,00157688 |
| TRINITY_DN3539_c0_g1_i1  | dmso | control | 0,74368774 | 2,02469532 | 0,01550618 | 0,0649802  |
| TRINITY_DN19605_c0_g1_i1 | dmso | control | 0,74236861 | 3,12434625 | 0,00032839 | 0,00290486 |
| TRINITY_DN7498_c0_g1_i1  | dmso | control | 0,74202476 | 3,63665687 | 0,00011836 | 0,00120831 |
| TRINITY_DN6602_c0_g1_i1  | dmso | control | 0,74151679 | 3,27329943 | 0,00043991 | 0,00370307 |
| TRINITY_DN497_c0_g1_i1   | dmso | control | 0,74073956 | 8,68759832 | 3,84E-10   | 1,29E-08   |
| TRINITY_DN20715_c0_g1_i1 | dmso | control | 0,74045723 | 3,25275797 | 0,00617515 | 0,03184578 |
| TRINITY_DN3240_c0_g1_i1  | dmso | control | 0,7397399  | 5,05187366 | 2,76E-07   | 5,48E-06   |
| TRINITY_DN9954_c0_g1_i1  | dmso | control | 0,73958002 | 1,82515548 | 0,00627237 | 0,03222061 |
| TRINITY_DN7484_c0_g1_i1  | dmso | control | 0,73853018 | 3,73438832 | 6,51E-05   | 0,00072486 |
| TRINITY_DN7595_c0_g1_i1  | dmso | control | 0,73845225 | 3,19442891 | 0,00133938 | 0,00946079 |
| TRINITY_DN7423_c0_g1_i1  | dmso | control | 0,73824679 | 3,84533787 | 5,25E-05   | 0,00059821 |
| TRINITY_DN22576_c0_g1_i1 | dmso | control | 0,73690821 | 3,83875099 | 8,21E-05   | 0,00088093 |
| TRINITY_DN9597_c0_g1_i1  | dmso | control | 0,7360494  | 1,82010063 | 0,0066812  | 0,03380385 |
| TRINITY_DN17083_c0_g1_i1 | dmso | control | 0,73589956 | 3,59355282 | 0,00048255 | 0,00400833 |
| TRINITY_DN17781_c0_g1_i1 | dmso | control | 0,73568376 | 1,80235344 | 0,01108017 | 0,05034699 |

|                          |      |         |            |            |            |            |
|--------------------------|------|---------|------------|------------|------------|------------|
| TRINITY_DN18909_c0_g1_i1 | dmso | control | 0,73442382 | 4,44729918 | 1,25E-05   | 0,00017129 |
| TRINITY_DN20794_c0_g1_i1 | dmso | control | 0,73427796 | 1,78214152 | 0,01367988 | 0,05919889 |
| TRINITY_DN7050_c0_g1_i1  | dmso | control | 0,7337389  | 4,3139045  | 0,00216974 | 0,01396695 |
| TRINITY_DN6076_c0_g1_i1  | dmso | control | 0,73311704 | 6,06118255 | 1,66E-08   | 4,19E-07   |
| TRINITY_DN12170_c0_g1_i1 | dmso | control | 0,73261426 | 4,38842528 | 3,73E-05   | 0,00044395 |
| TRINITY_DN23575_c0_g1_i1 | dmso | control | 0,73260254 | 1,51457035 | 0,01621012 | 0,06744102 |
| TRINITY_DN6901_c0_g1_i1  | dmso | control | 0,73235044 | 4,4979473  | 1,40E-05   | 0,00018896 |
| TRINITY_DN19362_c0_g1_i1 | dmso | control | 0,73233847 | 6,31732381 | 2,17E-09   | 6,48E-08   |
| TRINITY_DN2585_c0_g1_i1  | dmso | control | 0,73210546 | 4,93000292 | 0,00392327 | 0,02235568 |
| TRINITY_DN32869_c0_g1_i1 | dmso | control | 0,73166395 | 3,69533151 | 0,00014969 | 0,00147699 |
| TRINITY_DN6596_c0_g1_i1  | dmso | control | 0,73099286 | 3,33747267 | 0,00498998 | 0,02690567 |
| TRINITY_DN9407_c0_g1_i1  | dmso | control | 0,72862911 | 3,27484057 | 0,0006425  | 0,0051304  |
| TRINITY_DN20112_c0_g1_i1 | dmso | control | 0,72748371 | 2,07311515 | 0,00512849 | 0,02747813 |
| TRINITY_DN5223_c0_g1_i1  | dmso | control | 0,72742411 | 6,38843548 | 5,94E-10   | 1,94E-08   |
| TRINITY_DN26871_c0_g1_i1 | dmso | control | 0,72696903 | 2,01116701 | 0,02107322 | 0,08236001 |
| TRINITY_DN45881_c0_g1_i1 | dmso | control | 0,72574758 | 1,34355239 | 0,01849022 | 0,0746065  |
| TRINITY_DN10850_c0_g1_i1 | dmso | control | 0,72548504 | 4,96837053 | 1,56E-05   | 0,00020691 |
| TRINITY_DN12431_c0_g1_i1 | dmso | control | 0,72521934 | 4,61293083 | 1,66E-05   | 0,00021823 |
| TRINITY_DN8877_c0_g1_i1  | dmso | control | 0,72498337 | 2,75057311 | 0,00110299 | 0,00805088 |
| TRINITY_DN4854_c0_g1_i1  | dmso | control | 0,72424119 | 6,63050842 | 1,56E-08   | 3,95E-07   |
| TRINITY_DN1870_c0_g1_i1  | dmso | control | 0,7236956  | 1,7474624  | 0,01275861 | 0,05636028 |
| TRINITY_DN7086_c0_g1_i1  | dmso | control | 0,72306763 | 3,61122643 | 0,00079795 | 0,0061474  |
| TRINITY_DN2218_c0_g1_i1  | dmso | control | 0,72284346 | 3,36330141 | 0,00129423 | 0,00922307 |
| TRINITY_DN21098_c0_g1_i1 | dmso | control | 0,7223612  | 2,52791938 | 0,00435648 | 0,02422226 |
| TRINITY_DN12726_c0_g1_i1 | dmso | control | 0,7218084  | 4,36574197 | 4,54E-05   | 0,00052689 |
| TRINITY_DN13914_c0_g1_i1 | dmso | control | 0,7216684  | 2,10828944 | 0,01095342 | 0,04995964 |
| TRINITY_DN34611_c0_g1_i1 | dmso | control | 0,72166155 | 3,6159856  | 0,00014627 | 0,00144713 |
| TRINITY_DN5878_c0_g1_i1  | dmso | control | 0,72138796 | 4,07736937 | 0,00065694 | 0,00522835 |
| TRINITY_DN2053_c0_g1_i1  | dmso | control | 0,72113572 | 5,84048301 | 1,21E-08   | 3,16E-07   |
| TRINITY_DN17794_c0_g1_i1 | dmso | control | 0,72070166 | 3,67763851 | 0,00453803 | 0,02510604 |
| TRINITY_DN12165_c0_g1_i1 | dmso | control | 0,72030337 | 2,18376274 | 0,00501392 | 0,02698437 |

|                          |      |         |            |            |            |            |
|--------------------------|------|---------|------------|------------|------------|------------|
| TRINITY_DN28264_c0_g1_i1 | dmso | control | 0,71926564 | 3,41263122 | 0,00035369 | 0,00308521 |
| TRINITY_DN6429_c0_g1_i1  | dmso | control | 0,71922189 | 4,422518   | 7,12E-05   | 0,00078168 |
| TRINITY_DN19271_c0_g1_i1 | dmso | control | 0,71914679 | 3,20533283 | 0,00218765 | 0,0140572  |
| TRINITY_DN31674_c0_g1_i1 | dmso | control | 0,71881222 | 2,48949889 | 0,00455293 | 0,02515954 |
| TRINITY_DN21851_c0_g1_i1 | dmso | control | 0,71850242 | 3,9425144  | 0,00010811 | 0,0011171  |
| TRINITY_DN990_c0_g1_i1   | dmso | control | 0,71789247 | 5,3988646  | 7,37E-05   | 0,00080608 |
| TRINITY_DN17105_c0_g1_i1 | dmso | control | 0,71700588 | 2,54320012 | 0,00706769 | 0,03537521 |
| TRINITY_DN11736_c0_g1_i1 | dmso | control | 0,71665489 | 3,51865386 | 0,00120385 | 0,00866019 |
| TRINITY_DN763_c0_g1_i1   | dmso | control | 0,71634872 | 7,21287543 | 1,34E-10   | 4,86E-09   |
| TRINITY_DN13606_c0_g1_i1 | dmso | control | 0,71625305 | 2,37442723 | 0,00581714 | 0,03040107 |
| TRINITY_DN9473_c0_g1_i1  | dmso | control | 0,71622151 | 3,59238874 | 0,00018916 | 0,00179728 |
| TRINITY_DN12840_c0_g1_i1 | dmso | control | 0,71612708 | 3,66685371 | 0,00018925 | 0,00179728 |
| TRINITY_DN428_c0_g1_i1   | dmso | control | 0,71547292 | 8,87051623 | 1,60E-10   | 5,75E-09   |
| TRINITY_DN11548_c0_g1_i1 | dmso | control | 0,71547217 | 3,09367542 | 0,00565053 | 0,02971311 |
| TRINITY_DN11282_c0_g1_i1 | dmso | control | 0,71467146 | 4,64846307 | 0,0002029  | 0,00190685 |
| TRINITY_DN5618_c0_g1_i1  | dmso | control | 0,71401163 | 6,65513725 | 3,34E-09   | 9,46E-08   |
| TRINITY_DN6666_c0_g1_i1  | dmso | control | 0,71361815 | 5,64831015 | 2,38E-06   | 3,81E-05   |
| TRINITY_DN16708_c0_g1_i1 | dmso | control | 0,71337173 | 1,91442898 | 0,00768921 | 0,03780486 |
| TRINITY_DN1157_c0_g1_i1  | dmso | control | 0,71326918 | 4,92886922 | 0,00070505 | 0,00553201 |
| TRINITY_DN6327_c0_g1_i1  | dmso | control | 0,71251475 | 2,3804637  | 0,00658491 | 0,03346907 |
| TRINITY_DN6700_c0_g1_i1  | dmso | control | 0,71186784 | 2,08294126 | 0,01081393 | 0,04947963 |
| TRINITY_DN4264_c0_g1_i1  | dmso | control | 0,70981196 | 6,45290941 | 1,10E-08   | 2,89E-07   |
| TRINITY_DN13867_c0_g1_i1 | dmso | control | 0,70976275 | 2,69360162 | 0,00233646 | 0,01477676 |
| TRINITY_DN18924_c0_g1_i1 | dmso | control | 0,70974319 | 5,81354862 | 7,41E-08   | 1,68E-06   |
| TRINITY_DN6538_c0_g1_i1  | dmso | control | 0,7094168  | 4,00962948 | 7,54E-05   | 0,00082024 |
| TRINITY_DN6287_c0_g1_i1  | dmso | control | 0,70925542 | 3,60518363 | 0,00024255 | 0,00222595 |
| TRINITY_DN4144_c0_g1_i1  | dmso | control | 0,70873919 | 2,66052767 | 0,00529567 | 0,02822727 |
| TRINITY_DN32840_c0_g1_i1 | dmso | control | 0,70830719 | 3,52291226 | 0,00049276 | 0,00408139 |
| TRINITY_DN11015_c0_g1_i1 | dmso | control | 0,70794432 | 9,504789   | 2,63E-11   | 1,06E-09   |
| TRINITY_DN18927_c0_g1_i1 | dmso | control | 0,70790103 | 4,96045665 | 1,62E-06   | 2,71E-05   |
| TRINITY_DN12774_c0_g1_i1 | dmso | control | 0,70757915 | 4,5215183  | 1,59E-05   | 0,00020933 |

|                          |      |         |            |            |            |            |
|--------------------------|------|---------|------------|------------|------------|------------|
| TRINITY_DN16418_c0_g1_i1 | dmso | control | 0,70739316 | 2,4822582  | 0,0051688  | 0,02766331 |
| TRINITY_DN12382_c0_g1_i1 | dmso | control | 0,70670476 | 2,76182928 | 0,00584235 | 0,03047374 |
| TRINITY_DN9288_c0_g1_i1  | dmso | control | 0,7062027  | 3,96480202 | 6,34E-05   | 0,00070805 |
| TRINITY_DN9075_c0_g1_i1  | dmso | control | 0,70563421 | 2,32786888 | 0,00574684 | 0,03012086 |
| TRINITY_DN1242_c0_g1_i1  | dmso | control | 0,70547064 | 8,01236785 | 8,36E-10   | 2,67E-08   |
| TRINITY_DN15800_c0_g1_i1 | dmso | control | 0,70485251 | 2,81879871 | 0,00231032 | 0,0146307  |
| TRINITY_DN23_c0_g1_i1    | dmso | control | 0,70473618 | 5,18644844 | 0,00015138 | 0,00148959 |
| TRINITY_DN14535_c0_g1_i1 | dmso | control | 0,70465193 | 3,51624846 | 0,01633307 | 0,06775221 |
| TRINITY_DN11855_c0_g1_i1 | dmso | control | 0,70455563 | 3,30688141 | 0,00161716 | 0,01104489 |
| TRINITY_DN25495_c0_g1_i1 | dmso | control | 0,70437374 | 2,28164834 | 0,01146432 | 0,05172348 |
| TRINITY_DN6787_c0_g1_i1  | dmso | control | 0,70302542 | 4,33198758 | 0,00092453 | 0,0069089  |
| TRINITY_DN1162_c0_g1_i1  | dmso | control | 0,70085081 | 3,50888017 | 0,02067301 | 0,08119101 |
| TRINITY_DN11936_c0_g1_i1 | dmso | control | 0,70006184 | 4,30580399 | 7,38E-05   | 0,00080608 |
| TRINITY_DN8738_c0_g1_i1  | dmso | control | 0,69991689 | 1,74407032 | 0,01175122 | 0,05267793 |
| TRINITY_DN13826_c0_g1_i1 | dmso | control | 0,69966419 | 3,21260984 | 0,00128465 | 0,00917288 |
| TRINITY_DN15397_c0_g1_i1 | dmso | control | 0,69887435 | 3,01470513 | 0,00176718 | 0,01186746 |
| TRINITY_DN34567_c0_g1_i1 | dmso | control | 0,69870743 | 2,06400256 | 0,00878182 | 0,04192116 |
| TRINITY_DN11129_c0_g1_i1 | dmso | control | 0,69865451 | 3,83301486 | 0,00059218 | 0,00477612 |
| TRINITY_DN13845_c0_g1_i1 | dmso | control | 0,69862023 | 3,34541569 | 0,0022428  | 0,01431606 |
| TRINITY_DN2972_c0_g1_i1  | dmso | control | 0,69821651 | 4,17357627 | 6,22E-05   | 0,00069702 |
| TRINITY_DN6460_c0_g1_i1  | dmso | control | 0,69749932 | 3,72853761 | 0,00017451 | 0,00167826 |
| TRINITY_DN9009_c0_g1_i1  | dmso | control | 0,69718267 | 3,72447869 | 0,00394353 | 0,02244456 |
| TRINITY_DN20302_c0_g1_i1 | dmso | control | 0,69701899 | 4,1290227  | 0,00057967 | 0,00469882 |
| TRINITY_DN6541_c0_g1_i1  | dmso | control | 0,69681785 | 4,62009217 | 0,00040905 | 0,00348396 |
| TRINITY_DN5563_c0_g1_i1  | dmso | control | 0,69660505 | 4,27970083 | 3,17E-05   | 0,00038395 |
| TRINITY_DN13472_c0_g1_i1 | dmso | control | 0,69561758 | 5,39519047 | 9,22E-07   | 1,63E-05   |
| TRINITY_DN12697_c0_g1_i1 | dmso | control | 0,69503405 | 5,8007964  | 6,76E-07   | 1,23E-05   |
| TRINITY_DN18949_c0_g1_i1 | dmso | control | 0,69371366 | 4,89113018 | 5,30E-06   | 7,86E-05   |
| TRINITY_DN29890_c0_g1_i1 | dmso | control | 0,69299241 | 3,81829449 | 0,0003723  | 0,00321642 |
| TRINITY_DN5248_c0_g1_i1  | dmso | control | 0,69226633 | 6,91067569 | 1,43E-08   | 3,68E-07   |
| TRINITY_DN22370_c0_g1_i1 | dmso | control | 0,6907973  | 1,89376947 | 0,01451962 | 0,06166888 |



|                          |      |         |            |            |            |            |
|--------------------------|------|---------|------------|------------|------------|------------|
| TRINITY_DN11741_c0_g1_i1 | dmso | control | 0,6900833  | 5,91097472 | 2,64E-07   | 5,30E-06   |
| TRINITY_DN2204_c0_g1_i1  | dmso | control | 0,68996144 | 6,11743524 | 2,19E-06   | 3,53E-05   |
| TRINITY_DN6608_c0_g1_i1  | dmso | control | 0,68988357 | 3,55386431 | 0,00123574 | 0,00885871 |
| TRINITY_DN3186_c0_g1_i1  | dmso | control | 0,68980036 | 3,11628061 | 0,01004356 | 0,04659897 |
| TRINITY_DN15802_c0_g1_i1 | dmso | control | 0,68926135 | 2,34797676 | 0,01987013 | 0,07885644 |
| TRINITY_DN6514_c0_g1_i1  | dmso | control | 0,68898153 | 2,51819255 | 0,0036274  | 0,02105173 |
| TRINITY_DN3146_c0_g1_i1  | dmso | control | 0,688327   | 2,88867321 | 0,00158152 | 0,0108322  |
| TRINITY_DN7502_c0_g1_i1  | dmso | control | 0,68765553 | 4,48940331 | 0,00052396 | 0,00432    |
| TRINITY_DN7151_c0_g1_i1  | dmso | control | 0,68703624 | 7,16783174 | 8,42E-06   | 0,00011959 |
| TRINITY_DN6126_c0_g1_i1  | dmso | control | 0,68652926 | 6,29748656 | 1,31E-07   | 2,85E-06   |
| TRINITY_DN2993_c0_g1_i1  | dmso | control | 0,68649683 | 3,28656469 | 0,00063411 | 0,00507464 |
| TRINITY_DN684_c0_g1_i1   | dmso | control | 0,68628314 | 9,54675072 | 3,24E-10   | 1,10E-08   |
| TRINITY_DN6036_c0_g1_i1  | dmso | control | 0,68543741 | 3,91185764 | 0,00011283 | 0,00116005 |
| TRINITY_DN15839_c0_g1_i1 | dmso | control | 0,68465441 | 4,36824083 | 0,00068511 | 0,0054075  |
| TRINITY_DN11521_c0_g1_i1 | dmso | control | 0,68455006 | 3,32478532 | 0,00052685 | 0,00433638 |
| TRINITY_DN37138_c0_g1_i1 | dmso | control | 0,68312283 | 1,86226417 | 0,01634543 | 0,06775221 |
| TRINITY_DN46182_c0_g1_i1 | dmso | control | 0,68203271 | 1,38782053 | 0,02410314 | 0,09100101 |
| TRINITY_DN13632_c0_g1_i1 | dmso | control | 0,68193226 | 2,34958681 | 0,01432314 | 0,061099   |
| TRINITY_DN11491_c0_g1_i1 | dmso | control | 0,68185538 | 6,97217046 | 2,31E-06   | 3,71E-05   |
| TRINITY_DN5313_c0_g1_i1  | dmso | control | 0,68120527 | 7,05476282 | 4,13E-09   | 1,15E-07   |
| TRINITY_DN19126_c0_g1_i1 | dmso | control | 0,68050059 | 4,45165491 | 1,95E-05   | 0,00024976 |
| TRINITY_DN7237_c0_g1_i1  | dmso | control | 0,68046275 | 2,38563971 | 0,00543605 | 0,02883533 |
| TRINITY_DN5824_c0_g1_i1  | dmso | control | 0,67988805 | 7,74051289 | 2,65E-07   | 5,31E-06   |
| TRINITY_DN23013_c0_g1_i1 | dmso | control | 0,67953223 | 3,08983434 | 0,0013472  | 0,00951139 |
| TRINITY_DN2641_c0_g1_i1  | dmso | control | 0,67789984 | 1,68022682 | 0,02424554 | 0,09134763 |
| TRINITY_DN7245_c0_g1_i1  | dmso | control | 0,67770285 | 3,38658072 | 0,00281313 | 0,01717581 |
| TRINITY_DN308_c0_g1_i1   | dmso | control | 0,67766489 | 5,05674005 | 3,16E-05   | 0,00038348 |
| TRINITY_DN19620_c0_g1_i1 | dmso | control | 0,67747515 | 2,87339146 | 0,00468204 | 0,02567654 |
| TRINITY_DN13537_c0_g1_i1 | dmso | control | 0,67707298 | 3,88690484 | 0,00021715 | 0,00202107 |
| TRINITY_DN2631_c0_g1_i1  | dmso | control | 0,67684292 | 3,85319165 | 0,00055646 | 0,00453361 |
| TRINITY_DN14631_c0_g1_i1 | dmso | control | 0,67602464 | 2,58169238 | 0,0065729  | 0,03341975 |

|                          |      |         |            |            |            |            |
|--------------------------|------|---------|------------|------------|------------|------------|
| TRINITY_DN23735_c0_g1_i1 | dmso | control | 0,67596129 | 1,87914433 | 0,01316073 | 0,05759063 |
| TRINITY_DN8654_c0_g1_i1  | dmso | control | 0,6757765  | 6,04077098 | 2,19E-07   | 4,46E-06   |
| TRINITY_DN1652_c0_g1_i1  | dmso | control | 0,67542483 | 7,75495248 | 1,18E-09   | 3,65E-08   |
| TRINITY_DN5736_c0_g1_i1  | dmso | control | 0,6752002  | 5,89712951 | 4,56E-07   | 8,64E-06   |
| TRINITY_DN5136_c0_g1_i1  | dmso | control | 0,67344922 | 5,92243306 | 1,08E-07   | 2,39E-06   |
| TRINITY_DN20388_c0_g1_i1 | dmso | control | 0,67286066 | 2,4833042  | 0,01512139 | 0,06373751 |
| TRINITY_DN17028_c0_g1_i1 | dmso | control | 0,67276452 | 2,14130599 | 0,01795209 | 0,07290356 |
| TRINITY_DN1029_c0_g1_i1  | dmso | control | 0,67229746 | 3,57474887 | 0,00050312 | 0,00415527 |
| TRINITY_DN2219_c0_g1_i1  | dmso | control | 0,67198734 | 2,10637233 | 0,00915712 | 0,04328355 |
| TRINITY_DN5882_c0_g1_i1  | dmso | control | 0,67158159 | 6,97681337 | 1,85E-05   | 0,00023881 |
| TRINITY_DN11059_c0_g1_i1 | dmso | control | 0,67055499 | 5,07908226 | 2,67E-05   | 0,00033032 |
| TRINITY_DN6471_c0_g1_i1  | dmso | control | 0,6705291  | 4,60709537 | 3,93E-05   | 0,00046397 |
| TRINITY_DN7210_c0_g1_i1  | dmso | control | 0,67019332 | 3,07078758 | 0,02167962 | 0,08411554 |
| TRINITY_DN5014_c0_g1_i1  | dmso | control | 0,66905443 | 4,98969134 | 1,82E-05   | 0,00023628 |
| TRINITY_DN15222_c0_g1_i1 | dmso | control | 0,66830302 | 2,54736889 | 0,00926719 | 0,04373232 |
| TRINITY_DN2781_c0_g1_i1  | dmso | control | 0,66788406 | 4,77497561 | 0,00034071 | 0,00299547 |
| TRINITY_DN720_c0_g1_i1   | dmso | control | 0,66755566 | 8,54996353 | 9,53E-10   | 2,99E-08   |
| TRINITY_DN9149_c0_g1_i1  | dmso | control | 0,66701945 | 3,9036644  | 0,00043986 | 0,00370307 |
| TRINITY_DN11739_c0_g1_i1 | dmso | control | 0,66652903 | 3,2131286  | 0,00161889 | 0,01104624 |
| TRINITY_DN11701_c0_g1_i1 | dmso | control | 0,66566974 | 5,64185895 | 7,73E-06   | 0,00011093 |
| TRINITY_DN19979_c0_g1_i1 | dmso | control | 0,66480868 | 4,17582458 | 0,00018824 | 0,00179046 |
| TRINITY_DN3067_c0_g1_i1  | dmso | control | 0,66319968 | 5,01017469 | 0,00469098 | 0,02570605 |
| TRINITY_DN12707_c0_g1_i1 | dmso | control | 0,66218906 | 3,53165135 | 0,01551365 | 0,06499266 |
| TRINITY_DN20870_c0_g1_i1 | dmso | control | 0,66214965 | 2,63679738 | 0,00414048 | 0,02327207 |
| TRINITY_DN6035_c0_g1_i1  | dmso | control | 0,66197489 | 6,9981789  | 7,01E-08   | 1,60E-06   |
| TRINITY_DN19484_c0_g1_i1 | dmso | control | 0,66124736 | 2,89923639 | 0,00244675 | 0,0153681  |
| TRINITY_DN7938_c0_g1_i1  | dmso | control | 0,66086283 | 2,27849693 | 0,01371774 | 0,05927394 |
| TRINITY_DN13216_c0_g1_i1 | dmso | control | 0,66045937 | 4,47100313 | 6,85E-05   | 0,00075571 |
| TRINITY_DN3428_c0_g1_i1  | dmso | control | 0,65997679 | 4,52870104 | 0,00023259 | 0,00214957 |
| TRINITY_DN10959_c0_g1_i1 | dmso | control | 0,65988136 | 6,09510699 | 2,36E-06   | 3,79E-05   |
| TRINITY_DN12405_c0_g1_i1 | dmso | control | 0,65964071 | 3,98426526 | 0,00310545 | 0,01862885 |

|                          |      |         |            |            |            |            |
|--------------------------|------|---------|------------|------------|------------|------------|
| TRINITY_DN19856_c0_g1_i1 | dmso | control | 0,6594433  | 4,03392488 | 0,00081536 | 0,00625487 |
| TRINITY_DN32726_c0_g1_i1 | dmso | control | 0,65905303 | 6,27975625 | 3,80E-08   | 8,97E-07   |
| TRINITY_DN2441_c0_g1_i1  | dmso | control | 0,65870841 | 2,64526105 | 0,01767691 | 0,07213079 |
| TRINITY_DN6519_c0_g1_i1  | dmso | control | 0,6572566  | 3,08670729 | 0,0019799  | 0,01295859 |
| TRINITY_DN11116_c0_g1_i1 | dmso | control | 0,6570016  | 8,46218244 | 3,92E-09   | 1,10E-07   |
| TRINITY_DN12797_c0_g1_i1 | dmso | control | 0,65681794 | 2,13230362 | 0,02115475 | 0,08263396 |
| TRINITY_DN20303_c0_g1_i1 | dmso | control | 0,65542311 | 1,76415531 | 0,02413657 | 0,0910796  |
| TRINITY_DN5611_c0_g1_i1  | dmso | control | 0,65479811 | 6,75168362 | 1,58E-07   | 3,34E-06   |
| TRINITY_DN6743_c0_g1_i1  | dmso | control | 0,65479232 | 6,4995076  | 1,33E-07   | 2,88E-06   |
| TRINITY_DN21922_c0_g1_i1 | dmso | control | 0,65381476 | 2,11680906 | 0,01026115 | 0,04739987 |
| TRINITY_DN12194_c0_g1_i1 | dmso | control | 0,65330243 | 4,60751168 | 3,15E-05   | 0,00038194 |
| TRINITY_DN2260_c0_g1_i1  | dmso | control | 0,65250925 | 3,22704002 | 0,00338625 | 0,01990819 |
| TRINITY_DN10997_c0_g1_i1 | dmso | control | 0,6521663  | 6,0407218  | 0,00017979 | 0,00172216 |
| TRINITY_DN20364_c0_g1_i1 | dmso | control | 0,6520968  | 1,7670711  | 0,02284659 | 0,08741697 |
| TRINITY_DN1823_c0_g1_i1  | dmso | control | 0,65192239 | 3,95137199 | 0,00066363 | 0,00527584 |
| TRINITY_DN5058_c0_g1_i1  | dmso | control | 0,65155833 | 6,24624222 | 8,36E-06   | 0,00011888 |
| TRINITY_DN2760_c0_g1_i1  | dmso | control | 0,65147074 | 3,71656809 | 0,00061781 | 0,00495276 |
| TRINITY_DN1791_c0_g1_i1  | dmso | control | 0,64910589 | 4,16499217 | 0,00583453 | 0,0304589  |
| TRINITY_DN20202_c0_g1_i1 | dmso | control | 0,64855195 | 3,72746646 | 0,0010034  | 0,00741007 |
| TRINITY_DN26019_c0_g1_i1 | dmso | control | 0,64822813 | 2,96270069 | 0,02185266 | 0,08465048 |
| TRINITY_DN23769_c0_g1_i1 | dmso | control | 0,64785791 | 2,77232399 | 0,00505128 | 0,02713491 |
| TRINITY_DN12377_c0_g1_i1 | dmso | control | 0,64768503 | 2,11489817 | 0,01492333 | 0,06312618 |
| TRINITY_DN75603_c0_g1_i1 | dmso | control | 0,64674234 | 2,10674326 | 0,01503212 | 0,06349094 |
| TRINITY_DN23518_c0_g1_i1 | dmso | control | 0,64665582 | 1,75809476 | 0,01949138 | 0,0776698  |
| TRINITY_DN5927_c0_g1_i1  | dmso | control | 0,6460739  | 4,29752149 | 0,00108366 | 0,00792986 |
| TRINITY_DN6347_c0_g1_i1  | dmso | control | 0,64518372 | 4,43569158 | 0,0002939  | 0,00263687 |
| TRINITY_DN4673_c0_g1_i1  | dmso | control | 0,64517709 | 5,64079171 | 0,00099415 | 0,0073493  |
| TRINITY_DN77083_c0_g1_i1 | dmso | control | 0,64444482 | 2,65725991 | 0,00528076 | 0,0281686  |
| TRINITY_DN7403_c0_g1_i1  | dmso | control | 0,64419655 | 4,97983938 | 6,01E-05   | 0,00067501 |
| TRINITY_DN5011_c0_g1_i1  | dmso | control | 0,64414103 | 6,61220609 | 7,23E-08   | 1,64E-06   |
| TRINITY_DN10949_c0_g1_i1 | dmso | control | 0,64407176 | 6,26672811 | 1,44E-05   | 0,00019344 |

|                          |      |         |            |            |            |            |
|--------------------------|------|---------|------------|------------|------------|------------|
| TRINITY_DN20412_c0_g1_i1 | dmso | control | 0,64365848 | 8,54615421 | 7,05E-08   | 1,61E-06   |
| TRINITY_DN8315_c0_g1_i1  | dmso | control | 0,64356604 | 6,23124109 | 7,21E-06   | 0,00010415 |
| TRINITY_DN3034_c0_g1_i1  | dmso | control | 0,64243173 | 7,35007792 | 1,45E-08   | 3,71E-07   |
| TRINITY_DN23467_c0_g1_i1 | dmso | control | 0,64242528 | 4,37019269 | 0,00017014 | 0,00164282 |
| TRINITY_DN19394_c0_g1_i1 | dmso | control | 0,64233302 | 7,35001815 | 8,18E-07   | 1,46E-05   |
| TRINITY_DN2465_c0_g1_i1  | dmso | control | 0,64208034 | 3,66218929 | 0,00149765 | 0,01036087 |
| TRINITY_DN4774_c0_g1_i1  | dmso | control | 0,64187948 | 9,40436785 | 2,92E-09   | 8,38E-08   |
| TRINITY_DN19824_c0_g1_i1 | dmso | control | 0,6413845  | 8,07013338 | 8,42E-08   | 1,89E-06   |
| TRINITY_DN936_c0_g1_i1   | dmso | control | 0,64122361 | 6,26230076 | 3,59E-06   | 5,49E-05   |
| TRINITY_DN2340_c0_g1_i1  | dmso | control | 0,63935822 | 4,81055803 | 3,77E-05   | 0,00044738 |
| TRINITY_DN7319_c0_g1_i1  | dmso | control | 0,63870749 | 4,6354174  | 8,67E-05   | 0,00092235 |
| TRINITY_DN5594_c0_g1_i1  | dmso | control | 0,63857614 | 6,62964831 | 1,10E-07   | 2,43E-06   |
| TRINITY_DN13535_c0_g1_i1 | dmso | control | 0,63810621 | 5,05149511 | 1,80E-05   | 0,0002337  |
| TRINITY_DN10799_c0_g1_i1 | dmso | control | 0,63783226 | 7,98970249 | 1,53E-08   | 3,90E-07   |
| TRINITY_DN14974_c0_g1_i1 | dmso | control | 0,63688639 | 2,9007284  | 0,00530794 | 0,02826141 |
| TRINITY_DN3233_c0_g1_i1  | dmso | control | 0,63614936 | 3,37043206 | 0,00355134 | 0,0207102  |
| TRINITY_DN19589_c0_g1_i1 | dmso | control | 0,63568708 | 4,39415011 | 0,00018019 | 0,00172487 |
| TRINITY_DN30406_c0_g1_i1 | dmso | control | 0,63557503 | 2,63789153 | 0,00611934 | 0,03159178 |
| TRINITY_DN29790_c0_g1_i1 | dmso | control | 0,63543013 | 3,22321874 | 0,00199738 | 0,0130553  |
| TRINITY_DN2928_c0_g1_i1  | dmso | control | 0,63541076 | 3,69129587 | 0,00090242 | 0,00677521 |
| TRINITY_DN14672_c0_g1_i1 | dmso | control | 0,63495091 | 7,35623846 | 6,32E-07   | 1,16E-05   |
| TRINITY_DN5742_c0_g1_i1  | dmso | control | 0,63442877 | 5,42184083 | 1,46E-05   | 0,00019612 |
| TRINITY_DN13211_c0_g1_i1 | dmso | control | 0,63413846 | 3,95446633 | 0,00036084 | 0,00313237 |
| TRINITY_DN7722_c0_g1_i1  | dmso | control | 0,63393302 | 2,30788044 | 0,0109412  | 0,04991964 |
| TRINITY_DN6524_c0_g1_i1  | dmso | control | 0,633925   | 3,02368766 | 0,02121868 | 0,08279411 |
| TRINITY_DN6053_c0_g1_i1  | dmso | control | 0,63352012 | 6,01804443 | 3,10E-07   | 6,08E-06   |
| TRINITY_DN789_c0_g1_i1   | dmso | control | 0,63268103 | 3,47607902 | 0,01958962 | 0,07799672 |
| TRINITY_DN2847_c0_g1_i1  | dmso | control | 0,63259234 | 2,40474877 | 0,01447541 | 0,06156534 |
| TRINITY_DN26357_c0_g1_i1 | dmso | control | 0,63241851 | 2,25155342 | 0,0194035  | 0,07738364 |
| TRINITY_DN26009_c0_g1_i1 | dmso | control | 0,63239266 | 3,74500223 | 0,0025506  | 0,01586029 |
| TRINITY_DN2534_c0_g1_i1  | dmso | control | 0,63219943 | 3,24264978 | 0,00628083 | 0,03224939 |

|                          |      |         |            |            |            |            |
|--------------------------|------|---------|------------|------------|------------|------------|
| TRINITY_DN22329_c0_g1_i1 | dmso | control | 0,63208518 | 5,36737983 | 6,90E-05   | 0,00076015 |
| TRINITY_DN5571_c0_g1_i1  | dmso | control | 0,63152604 | 4,9052682  | 0,0001228  | 0,00124744 |
| TRINITY_DN20294_c0_g1_i1 | dmso | control | 0,63083148 | 4,90939118 | 0,00484445 | 0,02631744 |
| TRINITY_DN11580_c0_g1_i1 | dmso | control | 0,63078474 | 6,13388867 | 5,79E-07   | 1,07E-05   |
| TRINITY_DN2024_c0_g1_i1  | dmso | control | 0,63045135 | 4,30661379 | 0,00038573 | 0,00331263 |
| TRINITY_DN27388_c0_g1_i1 | dmso | control | 0,63008299 | 2,77966728 | 0,02133289 | 0,08308265 |
| TRINITY_DN8939_c0_g1_i1  | dmso | control | 0,62955078 | 1,80513245 | 0,02564207 | 0,09527535 |
| TRINITY_DN20999_c0_g1_i1 | dmso | control | 0,62953734 | 2,45489659 | 0,01001671 | 0,04654815 |
| TRINITY_DN12090_c0_g1_i1 | dmso | control | 0,62947552 | 5,64558396 | 1,41E-06   | 2,41E-05   |
| TRINITY_DN8138_c0_g1_i1  | dmso | control | 0,62909438 | 4,07927417 | 0,00075971 | 0,00589998 |
| TRINITY_DN11213_c0_g1_i1 | dmso | control | 0,62897686 | 7,85624381 | 1,07E-07   | 2,37E-06   |
| TRINITY_DN10294_c0_g1_i1 | dmso | control | 0,62802454 | 2,67144014 | 0,00634985 | 0,03251456 |
| TRINITY_DN1219_c0_g1_i1  | dmso | control | 0,62746181 | 7,06697756 | 1,56E-07   | 3,31E-06   |
| TRINITY_DN10217_c0_g1_i1 | dmso | control | 0,62674708 | 3,51721053 | 0,01502344 | 0,06347283 |
| TRINITY_DN7084_c0_g1_i1  | dmso | control | 0,62642134 | 4,35037966 | 0,00016312 | 0,00158246 |
| TRINITY_DN8382_c0_g1_i1  | dmso | control | 0,62601144 | 3,56774406 | 0,00167433 | 0,01134412 |
| TRINITY_DN2209_c0_g1_i1  | dmso | control | 0,62358028 | 6,00272055 | 7,73E-07   | 1,39E-05   |
| TRINITY_DN7649_c0_g1_i1  | dmso | control | 0,62358011 | 5,16048439 | 0,00047449 | 0,00395501 |
| TRINITY_DN896_c0_g1_i1   | dmso | control | 0,62347745 | 8,01004404 | 1,18E-08   | 3,11E-07   |
| TRINITY_DN29213_c0_g1_i1 | dmso | control | 0,62326377 | 5,83018753 | 1,94E-06   | 3,17E-05   |
| TRINITY_DN14914_c0_g1_i1 | dmso | control | 0,62306738 | 3,81205798 | 0,00200533 | 0,0131013  |
| TRINITY_DN26851_c0_g1_i1 | dmso | control | 0,62277217 | 4,18016345 | 0,00024602 | 0,00225208 |
| TRINITY_DN66001_c0_g1_i1 | dmso | control | 0,62195911 | 2,12626726 | 0,01714924 | 0,07037521 |
| TRINITY_DN2557_c0_g1_i1  | dmso | control | 0,62189084 | 3,04981861 | 0,00460654 | 0,02536848 |
| TRINITY_DN13755_c0_g1_i1 | dmso | control | 0,62187486 | 8,52422468 | 9,48E-07   | 1,66E-05   |
| TRINITY_DN3295_c0_g1_i1  | dmso | control | 0,62184792 | 4,22009308 | 0,00031457 | 0,0027963  |
| TRINITY_DN30677_c0_g1_i1 | dmso | control | 0,62142861 | 2,1684706  | 0,02301057 | 0,08797403 |
| TRINITY_DN11332_c0_g1_i1 | dmso | control | 0,62107334 | 4,62324197 | 0,00838006 | 0,04049846 |
| TRINITY_DN14638_c0_g1_i1 | dmso | control | 0,62072565 | 2,73269673 | 0,0057725  | 0,03020055 |
| TRINITY_DN14216_c0_g1_i1 | dmso | control | 0,6199981  | 2,7903561  | 0,00477573 | 0,02603514 |
| TRINITY_DN3525_c0_g1_i1  | dmso | control | 0,61974189 | 3,21989989 | 0,00225819 | 0,0143825  |

|                          |      |         |            |            |            |            |
|--------------------------|------|---------|------------|------------|------------|------------|
| TRINITY_DN2565_c0_g1_i1  | dmso | control | 0,61961672 | 2,37377446 | 0,01190998 | 0,05329606 |
| TRINITY_DN19421_c0_g1_i1 | dmso | control | 0,61956488 | 6,10224281 | 3,59E-07   | 6,95E-06   |
| TRINITY_DN20031_c0_g1_i1 | dmso | control | 0,61918862 | 2,64389529 | 0,01396912 | 0,06000607 |
| TRINITY_DN13246_c0_g1_i1 | dmso | control | 0,6191442  | 4,21133523 | 0,00972882 | 0,04547986 |
| TRINITY_DN35609_c0_g1_i1 | dmso | control | 0,61830817 | 2,30418891 | 0,01331212 | 0,05811228 |
| TRINITY_DN12893_c0_g1_i1 | dmso | control | 0,61808567 | 3,73900864 | 0,00100881 | 0,00744625 |
| TRINITY_DN4672_c0_g1_i1  | dmso | control | 0,61768883 | 3,99753851 | 0,00172538 | 0,01163544 |
| TRINITY_DN6655_c0_g1_i1  | dmso | control | 0,61679164 | 4,43171943 | 0,00011585 | 0,00118769 |
| TRINITY_DN21524_c0_g1_i1 | dmso | control | 0,61647851 | 2,56312011 | 0,0177019  | 0,07218042 |
| TRINITY_DN13253_c0_g1_i1 | dmso | control | 0,6162133  | 3,86546703 | 0,00144178 | 0,01004173 |
| TRINITY_DN435_c0_g1_i1   | dmso | control | 0,61605546 | 6,30462971 | 4,09E-05   | 0,00047958 |
| TRINITY_DN1968_c0_g1_i1  | dmso | control | 0,61571435 | 3,10235869 | 0,00353919 | 0,02065599 |
| TRINITY_DN4230_c0_g1_i1  | dmso | control | 0,61459708 | 5,06962724 | 1,83E-05   | 0,00023706 |
| TRINITY_DN1883_c0_g1_i1  | dmso | control | 0,61431135 | 3,6425649  | 0,00459904 | 0,02533684 |
| TRINITY_DN1450_c0_g1_i1  | dmso | control | 0,61393683 | 4,47424026 | 0,00060999 | 0,00490064 |
| TRINITY_DN366_c0_g1_i1   | dmso | control | 0,61283307 | 7,58614694 | 2,72E-07   | 5,42E-06   |
| TRINITY_DN33613_c0_g1_i1 | dmso | control | 0,61224455 | 2,81862873 | 0,00777754 | 0,03810944 |
| TRINITY_DN2386_c0_g1_i1  | dmso | control | 0,61203173 | 5,87501866 | 2,68E-06   | 4,27E-05   |
| TRINITY_DN6949_c0_g1_i1  | dmso | control | 0,61201289 | 5,16392413 | 7,59E-05   | 0,00082533 |
| TRINITY_DN6459_c0_g1_i1  | dmso | control | 0,61187426 | 2,97491039 | 0,00642851 | 0,03283587 |
| TRINITY_DN992_c0_g1_i1   | dmso | control | 0,61149453 | 6,23809236 | 3,13E-05   | 0,00038055 |
| TRINITY_DN6224_c0_g1_i1  | dmso | control | 0,61136821 | 3,00830645 | 0,00672933 | 0,0339878  |
| TRINITY_DN1698_c0_g1_i1  | dmso | control | 0,61119569 | 8,12050279 | 1,11E-07   | 2,45E-06   |
| TRINITY_DN98_c0_g1_i1    | dmso | control | 0,61084293 | 7,51524081 | 9,79E-08   | 2,18E-06   |
| TRINITY_DN7201_c0_g1_i1  | dmso | control | 0,61043492 | 4,68446103 | 9,49E-05   | 0,00100014 |
| TRINITY_DN11633_c0_g1_i1 | dmso | control | 0,60983711 | 3,68448952 | 0,00138927 | 0,00974172 |
| TRINITY_DN21352_c0_g1_i1 | dmso | control | 0,60934186 | 3,16059136 | 0,00456143 | 0,02519689 |
| TRINITY_DN3090_c0_g1_i1  | dmso | control | 0,60927198 | 5,94192051 | 0,00010454 | 0,00108563 |
| TRINITY_DN2247_c0_g1_i1  | dmso | control | 0,60718276 | 5,26769934 | 6,16E-05   | 0,00068991 |
| TRINITY_DN3279_c0_g1_i1  | dmso | control | 0,60713311 | 3,7534089  | 0,00289793 | 0,01758112 |
| TRINITY_DN2481_c0_g1_i1  | dmso | control | 0,60705846 | 5,10510381 | 0,00373542 | 0,02151442 |

|                          |      |         |            |            |            |            |
|--------------------------|------|---------|------------|------------|------------|------------|
| TRINITY_DN6386_c0_g1_i1  | dmso | control | 0,60669442 | 3,48830389 | 0,00329417 | 0,01953378 |
| TRINITY_DN8928_c0_g1_i1  | dmso | control | 0,60629534 | 6,40225592 | 2,12E-07   | 4,33E-06   |
| TRINITY_DN25023_c0_g1_i1 | dmso | control | 0,60563915 | 2,13190411 | 0,02125853 | 0,08290484 |
| TRINITY_DN21022_c0_g1_i1 | dmso | control | 0,60533054 | 3,60891689 | 0,00239947 | 0,01512229 |
| TRINITY_DN6823_c0_g1_i1  | dmso | control | 0,605185   | 5,47899324 | 6,45E-06   | 9,40E-05   |
| TRINITY_DN35382_c0_g1_i1 | dmso | control | 0,60512127 | 3,0540113  | 0,00976925 | 0,04563933 |
| TRINITY_DN10962_c0_g1_i1 | dmso | control | 0,60498789 | 3,58342819 | 0,00628244 | 0,03224939 |
| TRINITY_DN1884_c0_g1_i1  | dmso | control | 0,60495673 | 3,30551994 | 0,00263481 | 0,01628576 |
| TRINITY_DN5154_c0_g1_i1  | dmso | control | 0,60427396 | 8,46411438 | 2,00E-08   | 4,99E-07   |
| TRINITY_DN2871_c0_g1_i1  | dmso | control | 0,60413864 | 5,59855197 | 8,15E-05   | 0,00087744 |
| TRINITY_DN7287_c0_g1_i1  | dmso | control | 0,60379457 | 3,34702944 | 0,00376319 | 0,02163985 |
| TRINITY_DN6437_c0_g1_i1  | dmso | control | 0,60265312 | 4,42159702 | 0,00019357 | 0,00183352 |
| TRINITY_DN36723_c0_g1_i1 | dmso | control | 0,60257851 | 3,38275535 | 0,01544856 | 0,06479616 |
| TRINITY_DN6779_c0_g1_i1  | dmso | control | 0,60252055 | 4,61461998 | 0,00196929 | 0,01290087 |
| TRINITY_DN13969_c0_g1_i1 | dmso | control | 0,60249807 | 2,70035131 | 0,01413695 | 0,06052408 |
| TRINITY_DN9330_c0_g1_i1  | dmso | control | 0,60217185 | 3,12311307 | 0,00595635 | 0,03093647 |
| TRINITY_DN2274_c0_g1_i1  | dmso | control | 0,60205788 | 5,81628544 | 5,92E-05   | 0,00066601 |
| TRINITY_DN23639_c0_g1_i1 | dmso | control | 0,60155198 | 4,33861564 | 0,0166921  | 0,06891038 |
| TRINITY_DN1609_c0_g1_i1  | dmso | control | 0,60047813 | 4,57009708 | 0,00055464 | 0,00452765 |
| TRINITY_DN9672_c0_g1_i1  | dmso | control | 0,60027395 | 4,22768447 | 0,00091029 | 0,00682366 |
| TRINITY_DN11128_c0_g1_i1 | dmso | control | 0,60023125 | 3,96367777 | 0,00237386 | 0,01499363 |
| TRINITY_DN15446_c0_g1_i1 | dmso | control | 0,59946063 | 4,8712245  | 0,00012426 | 0,00125939 |
| TRINITY_DN1621_c0_g1_i1  | dmso | control | 0,59935594 | 3,70693048 | 0,00167751 | 0,01136035 |
| TRINITY_DN1740_c0_g1_i1  | dmso | control | 0,59751766 | 5,35716603 | 2,16E-05   | 0,00027357 |
| TRINITY_DN11325_c0_g1_i1 | dmso | control | 0,59725255 | 3,38522366 | 0,00476395 | 0,02600101 |
| TRINITY_DN14780_c0_g1_i1 | dmso | control | 0,59708247 | 3,30983663 | 0,01241602 | 0,05518444 |
| TRINITY_DN18698_c0_g1_i1 | dmso | control | 0,59702452 | 5,08936997 | 4,97E-05   | 0,00057139 |
| TRINITY_DN4542_c0_g1_i1  | dmso | control | 0,59651668 | 4,46875098 | 0,00019943 | 0,00187918 |
| TRINITY_DN5558_c0_g1_i1  | dmso | control | 0,59651092 | 4,70797341 | 0,00058609 | 0,00474024 |
| TRINITY_DN4765_c0_g1_i1  | dmso | control | 0,59614815 | 7,38158616 | 2,04E-07   | 4,20E-06   |
| TRINITY_DN20286_c0_g1_i1 | dmso | control | 0,59613898 | 3,43026056 | 0,01253218 | 0,05559808 |

|                          |      |         |            |            |            |            |
|--------------------------|------|---------|------------|------------|------------|------------|
| TRINITY_DN20808_c0_g1_i1 | dmso | control | 0,59542944 | 2,12599867 | 0,02692033 | 0,09889731 |
| TRINITY_DN1161_c0_g1_i1  | dmso | control | 0,59506738 | 6,21801284 | 1,61E-06   | 2,71E-05   |
| TRINITY_DN6232_c0_g1_i1  | dmso | control | 0,59426679 | 3,95788352 | 0,01192142 | 0,0533181  |
| TRINITY_DN3616_c0_g1_i1  | dmso | control | 0,59323542 | 3,84410184 | 0,00144841 | 0,01007814 |
| TRINITY_DN10803_c0_g1_i1 | dmso | control | 0,59319874 | 6,34660213 | 2,33E-05   | 0,00029273 |
| TRINITY_DN8386_c0_g1_i1  | dmso | control | 0,59303536 | 2,22906283 | 0,02611423 | 0,09662398 |
| TRINITY_DN27658_c0_g1_i1 | dmso | control | 0,5926689  | 8,56326863 | 7,06E-08   | 1,61E-06   |
| TRINITY_DN11938_c0_g1_i1 | dmso | control | 0,59260888 | 4,89556204 | 0,00033444 | 0,00294751 |
| TRINITY_DN9575_c0_g1_i1  | dmso | control | 0,59079467 | 4,27439817 | 0,00148209 | 0,01028281 |
| TRINITY_DN1333_c0_g1_i1  | dmso | control | 0,59071003 | 4,8315477  | 0,00010731 | 0,00111115 |
| TRINITY_DN1264_c0_g1_i1  | dmso | control | 0,58934549 | 5,82911492 | 5,57E-06   | 8,22E-05   |
| TRINITY_DN3218_c0_g1_i1  | dmso | control | 0,58851241 | 3,73123639 | 0,00640884 | 0,03274698 |
| TRINITY_DN1719_c0_g1_i1  | dmso | control | 0,58846883 | 5,01643959 | 0,0001252  | 0,00126647 |
| TRINITY_DN2722_c0_g1_i1  | dmso | control | 0,58817236 | 2,732685   | 0,01301384 | 0,05712089 |
| TRINITY_DN11606_c0_g1_i1 | dmso | control | 0,58754156 | 4,21317034 | 0,00227685 | 0,0144695  |
| TRINITY_DN40052_c0_g1_i1 | dmso | control | 0,58751102 | 2,55993824 | 0,01411374 | 0,06046055 |
| TRINITY_DN858_c0_g1_i1   | dmso | control | 0,58721846 | 6,90013905 | 8,31E-06   | 0,00011823 |
| TRINITY_DN19179_c0_g1_i1 | dmso | control | 0,58667944 | 5,77436931 | 3,33E-06   | 5,14E-05   |
| TRINITY_DN417_c0_g1_i1   | dmso | control | 0,58640543 | 6,06209484 | 0,00541411 | 0,02874196 |
| TRINITY_DN26937_c0_g1_i1 | dmso | control | 0,58613362 | 5,64136893 | 0,00011658 | 0,00119431 |
| TRINITY_DN74361_c0_g1_i1 | dmso | control | 0,58526059 | 3,43302866 | 0,01460272 | 0,06196719 |
| TRINITY_DN1038_c0_g1_i1  | dmso | control | 0,58427917 | 5,91553775 | 2,37E-05   | 0,00029686 |
| TRINITY_DN20916_c0_g1_i1 | dmso | control | 0,58414144 | 3,28771793 | 0,00991528 | 0,04617222 |
| TRINITY_DN2519_c0_g1_i1  | dmso | control | 0,58393731 | 5,58475078 | 0,0011799  | 0,00852182 |
| TRINITY_DN6562_c0_g1_i1  | dmso | control | 0,58385813 | 3,40843177 | 0,00749355 | 0,03701926 |
| TRINITY_DN24302_c0_g1_i1 | dmso | control | 0,58175471 | 2,33240946 | 0,02586233 | 0,09591305 |
| TRINITY_DN1646_c0_g1_i1  | dmso | control | 0,5813168  | 6,96231524 | 0,00250731 | 0,01567882 |
| TRINITY_DN12858_c0_g1_i1 | dmso | control | 0,58052988 | 2,82173831 | 0,00863326 | 0,04137606 |
| TRINITY_DN19938_c0_g1_i1 | dmso | control | 0,5797471  | 2,327626   | 0,02028431 | 0,0800565  |
| TRINITY_DN4814_c0_g1_i1  | dmso | control | 0,5797105  | 6,5821598  | 6,40E-06   | 9,34E-05   |
| TRINITY_DN19248_c0_g1_i1 | dmso | control | 0,57914952 | 5,07836318 | 0,00064201 | 0,00512935 |



|                          |      |         |            |            |            |            |
|--------------------------|------|---------|------------|------------|------------|------------|
| TRINITY_DN9883_c0_g1_i1  | dmso | control | 0,57880495 | 2,94026388 | 0,01123236 | 0,05092636 |
| TRINITY_DN19288_c0_g1_i1 | dmso | control | 0,57853812 | 4,17408869 | 0,00800795 | 0,039076   |
| TRINITY_DN14429_c0_g1_i1 | dmso | control | 0,57657063 | 3,66480202 | 0,01001473 | 0,04654815 |
| TRINITY_DN23409_c0_g1_i1 | dmso | control | 0,57619165 | 2,73850678 | 0,01875073 | 0,07537265 |
| TRINITY_DN23572_c0_g1_i1 | dmso | control | 0,57614748 | 5,2306966  | 0,00053612 | 0,00440265 |
| TRINITY_DN8709_c0_g1_i1  | dmso | control | 0,57565571 | 3,90584307 | 0,01182641 | 0,05293847 |
| TRINITY_DN23915_c0_g1_i1 | dmso | control | 0,57528145 | 3,24771526 | 0,00406486 | 0,02293628 |
| TRINITY_DN9138_c0_g1_i1  | dmso | control | 0,57463018 | 2,29470433 | 0,01983059 | 0,07878116 |
| TRINITY_DN3516_c0_g1_i1  | dmso | control | 0,57422892 | 2,39701    | 0,02564421 | 0,09527535 |
| TRINITY_DN7418_c0_g1_i1  | dmso | control | 0,57398354 | 2,5204952  | 0,02079644 | 0,08149881 |
| TRINITY_DN13032_c0_g1_i1 | dmso | control | 0,57379407 | 3,46859118 | 0,00453451 | 0,02509615 |
| TRINITY_DN8239_c0_g1_i1  | dmso | control | 0,57358564 | 3,61822013 | 0,00221994 | 0,01420779 |
| TRINITY_DN7098_c0_g1_i1  | dmso | control | 0,57349452 | 3,2043502  | 0,0045765  | 0,02526083 |
| TRINITY_DN41421_c0_g1_i1 | dmso | control | 0,57328256 | 3,47230961 | 0,00322991 | 0,01925552 |
| TRINITY_DN624_c0_g1_i1   | dmso | control | 0,57292087 | 5,81519647 | 3,22E-05   | 0,00038842 |
| TRINITY_DN1960_c0_g1_i1  | dmso | control | 0,57235226 | 3,67095527 | 0,00220034 | 0,01410811 |
| TRINITY_DN5477_c0_g1_i1  | dmso | control | 0,57232276 | 4,9160845  | 0,00014341 | 0,00142377 |
| TRINITY_DN13422_c0_g1_i1 | dmso | control | 0,5721925  | 4,8816158  | 0,00016189 | 0,00157688 |
| TRINITY_DN33764_c0_g1_i1 | dmso | control | 0,57122668 | 3,27181509 | 0,00504103 | 0,02709999 |
| TRINITY_DN15862_c0_g1_i1 | dmso | control | 0,57097414 | 6,49606592 | 7,97E-05   | 0,00086057 |
| TRINITY_DN1387_c0_g1_i1  | dmso | control | 0,56985774 | 4,66789802 | 0,00025207 | 0,00230599 |
| TRINITY_DN1479_c0_g1_i1  | dmso | control | 0,56975073 | 5,2259476  | 0,00163399 | 0,01110726 |
| TRINITY_DN4909_c0_g1_i1  | dmso | control | 0,56955891 | 5,61898794 | 0,00185706 | 0,0123278  |
| TRINITY_DN19772_c0_g1_i1 | dmso | control | 0,56950456 | 2,71924841 | 0,01268038 | 0,05613489 |
| TRINITY_DN19843_c0_g1_i1 | dmso | control | 0,56936777 | 2,15043202 | 0,0252925  | 0,09433261 |
| TRINITY_DN19519_c0_g1_i1 | dmso | control | 0,56934226 | 3,86259387 | 0,00296971 | 0,01794362 |
| TRINITY_DN14315_c0_g1_i1 | dmso | control | 0,56928839 | 3,17577154 | 0,00982243 | 0,04585813 |
| TRINITY_DN2031_c0_g1_i1  | dmso | control | 0,56908293 | 5,85906611 | 6,50E-06   | 9,45E-05   |
| TRINITY_DN8400_c0_g1_i1  | dmso | control | 0,56778131 | 3,80732609 | 0,00193748 | 0,01273291 |
| TRINITY_DN1394_c0_g1_i1  | dmso | control | 0,56749806 | 4,3668682  | 0,00882548 | 0,04210174 |
| TRINITY_DN1720_c0_g1_i1  | dmso | control | 0,56717577 | 3,84802676 | 0,00238341 | 0,01504736 |

|                          |      |         |            |            |            |            |
|--------------------------|------|---------|------------|------------|------------|------------|
| TRINITY_DN41_c0_g1_i1    | dmso | control | 0,56685612 | 5,84255992 | 1,28E-05   | 0,00017455 |
| TRINITY_DN18720_c0_g1_i1 | dmso | control | 0,56679869 | 6,39483871 | 4,78E-05   | 0,00055117 |
| TRINITY_DN11809_c0_g1_i1 | dmso | control | 0,56661187 | 4,69649567 | 0,00020486 | 0,00192157 |
| TRINITY_DN14129_c0_g1_i1 | dmso | control | 0,56639692 | 4,12028786 | 0,01538882 | 0,06465723 |
| TRINITY_DN3094_c0_g1_i1  | dmso | control | 0,56611547 | 4,83918644 | 0,00017178 | 0,00165535 |
| TRINITY_DN11717_c0_g1_i1 | dmso | control | 0,56589052 | 2,74168611 | 0,02033882 | 0,08018403 |
| TRINITY_DN22715_c0_g1_i1 | dmso | control | 0,56537565 | 2,75148775 | 0,01875315 | 0,07537265 |
| TRINITY_DN17140_c0_g1_i1 | dmso | control | 0,56535827 | 2,17750999 | 0,02432608 | 0,0915317  |
| TRINITY_DN6529_c0_g1_i1  | dmso | control | 0,56509108 | 4,9232672  | 0,00266682 | 0,01645545 |
| TRINITY_DN2078_c0_g1_i1  | dmso | control | 0,56485646 | 3,55187281 | 0,00384481 | 0,02199533 |
| TRINITY_DN5784_c0_g1_i1  | dmso | control | 0,56475581 | 4,6948478  | 0,00053991 | 0,00442124 |
| TRINITY_DN8092_c0_g1_i1  | dmso | control | 0,56443746 | 5,36731727 | 6,39E-05   | 0,00071283 |
| TRINITY_DN20864_c0_g1_i1 | dmso | control | 0,56389722 | 2,96057705 | 0,0148534  | 0,06290159 |
| TRINITY_DN22921_c0_g1_i1 | dmso | control | 0,56349872 | 3,65594529 | 0,01256473 | 0,05569116 |
| TRINITY_DN12825_c0_g1_i1 | dmso | control | 0,56346113 | 3,3720976  | 0,00418507 | 0,02345883 |
| TRINITY_DN1066_c0_g1_i1  | dmso | control | 0,5633914  | 6,19623501 | 6,48E-06   | 9,42E-05   |
| TRINITY_DN3983_c0_g1_i1  | dmso | control | 0,56305622 | 3,97437861 | 0,00374064 | 0,02153591 |
| TRINITY_DN14820_c0_g1_i1 | dmso | control | 0,562934   | 2,93843877 | 0,0177398  | 0,07224456 |
| TRINITY_DN12608_c0_g1_i1 | dmso | control | 0,56233835 | 3,03183644 | 0,01334896 | 0,05820275 |
| TRINITY_DN11681_c0_g1_i1 | dmso | control | 0,56199341 | 5,01595038 | 0,00028164 | 0,00253953 |
| TRINITY_DN9513_c0_g1_i1  | dmso | control | 0,56127777 | 4,84645084 | 0,00149025 | 0,01031465 |
| TRINITY_DN760_c0_g1_i1   | dmso | control | 0,56087924 | 7,11548932 | 2,99E-06   | 4,66E-05   |
| TRINITY_DN8113_c0_g1_i1  | dmso | control | 0,56045868 | 2,22770259 | 0,02365261 | 0,08981651 |
| TRINITY_DN7626_c0_g1_i1  | dmso | control | 0,55934691 | 5,57510572 | 6,24E-05   | 0,00069805 |
| TRINITY_DN5085_c0_g1_i1  | dmso | control | 0,55924178 | 5,56550415 | 2,82E-05   | 0,00034619 |
| TRINITY_DN23765_c0_g1_i1 | dmso | control | 0,55900648 | 3,26963219 | 0,0077013  | 0,03782566 |
| TRINITY_DN6857_c0_g1_i1  | dmso | control | 0,55876543 | 6,49232301 | 1,26E-05   | 0,00017228 |
| TRINITY_DN21043_c0_g1_i1 | dmso | control | 0,55706094 | 3,53615088 | 0,00372352 | 0,021463   |
| TRINITY_DN37572_c0_g1_i1 | dmso | control | 0,55661685 | 3,16631412 | 0,00660546 | 0,03350411 |
| TRINITY_DN8896_c0_g1_i1  | dmso | control | 0,55564904 | 3,46539449 | 0,00401356 | 0,02274454 |
| TRINITY_DN34259_c0_g1_i1 | dmso | control | 0,55499294 | 3,90365485 | 0,00493774 | 0,02671428 |

|                          |      |         |            |            |            |            |
|--------------------------|------|---------|------------|------------|------------|------------|
| TRINITY_DN1511_c0_g1_i1  | dmso | control | 0,55422271 | 6,31729248 | 2,78E-06   | 4,39E-05   |
| TRINITY_DN19180_c0_g1_i1 | dmso | control | 0,55392023 | 4,6012487  | 0,00060201 | 0,00484725 |
| TRINITY_DN2718_c0_g1_i1  | dmso | control | 0,55364754 | 3,79180637 | 0,00337368 | 0,01985728 |
| TRINITY_DN36227_c0_g1_i1 | dmso | control | 0,5532125  | 2,9210692  | 0,02189948 | 0,08474095 |
| TRINITY_DN2667_c0_g1_i1  | dmso | control | 0,55318542 | 4,26369537 | 0,002253   | 0,01436215 |
| TRINITY_DN1340_c0_g1_i1  | dmso | control | 0,55310224 | 5,94362272 | 2,24E-05   | 0,00028181 |
| TRINITY_DN8224_c0_g1_i1  | dmso | control | 0,55306794 | 5,32710677 | 5,60E-05   | 0,00063497 |
| TRINITY_DN9026_c0_g1_i1  | dmso | control | 0,55279621 | 4,35287657 | 0,00192355 | 0,01267593 |
| TRINITY_DN11976_c0_g1_i1 | dmso | control | 0,55096505 | 4,02048802 | 0,0017993  | 0,01203279 |
| TRINITY_DN17213_c0_g1_i1 | dmso | control | 0,55091152 | 5,25027373 | 0,0001012  | 0,00105543 |
| TRINITY_DN19881_c0_g1_i1 | dmso | control | 0,55078424 | 3,26399218 | 0,01294213 | 0,05695908 |
| TRINITY_DN1009_c0_g1_i1  | dmso | control | 0,55070054 | 7,10219671 | 5,99E-06   | 8,78E-05   |
| TRINITY_DN534_c0_g1_i1   | dmso | control | 0,55067911 | 6,45445995 | 0,00020113 | 0,00189394 |
| TRINITY_DN34173_c0_g1_i1 | dmso | control | 0,55025851 | 4,81133449 | 0,00119159 | 0,00858478 |
| TRINITY_DN34613_c0_g1_i1 | dmso | control | 0,55022104 | 4,12358169 | 0,01992413 | 0,07902363 |
| TRINITY_DN20643_c0_g1_i1 | dmso | control | 0,54989651 | 2,52778907 | 0,02075545 | 0,08136025 |
| TRINITY_DN6209_c0_g1_i1  | dmso | control | 0,54982216 | 5,64442506 | 2,55E-05   | 0,00031698 |
| TRINITY_DN2528_c0_g1_i1  | dmso | control | 0,54961633 | 3,51340808 | 0,00447509 | 0,02479583 |
| TRINITY_DN6309_c0_g1_i1  | dmso | control | 0,54917163 | 5,31385668 | 0,00023396 | 0,00216086 |
| TRINITY_DN7452_c0_g1_i1  | dmso | control | 0,5485939  | 3,19737535 | 0,0068872  | 0,03460368 |
| TRINITY_DN20212_c0_g1_i1 | dmso | control | 0,54855875 | 2,87455626 | 0,01987901 | 0,07886633 |
| TRINITY_DN4413_c0_g1_i1  | dmso | control | 0,54845301 | 3,15929266 | 0,00747367 | 0,03694631 |
| TRINITY_DN1654_c0_g1_i1  | dmso | control | 0,54773052 | 6,61953115 | 2,92E-05   | 0,00035658 |
| TRINITY_DN10542_c0_g1_i1 | dmso | control | 0,54765626 | 3,88275487 | 0,01333046 | 0,05815721 |
| TRINITY_DN21059_c0_g1_i1 | dmso | control | 0,54729976 | 3,14007549 | 0,0069622  | 0,03489557 |
| TRINITY_DN5835_c0_g1_i1  | dmso | control | 0,54728457 | 5,09927044 | 0,00162444 | 0,01106329 |
| TRINITY_DN78572_c0_g1_i1 | dmso | control | 0,54719809 | 4,30910045 | 0,00151029 | 0,01043335 |
| TRINITY_DN16493_c0_g1_i1 | dmso | control | 0,54690269 | 3,41367951 | 0,00482696 | 0,02625633 |
| TRINITY_DN5463_c0_g1_i1  | dmso | control | 0,54644277 | 4,82194807 | 0,0019814  | 0,01296255 |
| TRINITY_DN407_c0_g1_i1   | dmso | control | 0,54643904 | 5,02491081 | 0,02279995 | 0,08726689 |
| TRINITY_DN7865_c0_g1_i1  | dmso | control | 0,5457918  | 5,09243475 | 0,00014005 | 0,00139522 |

|                          |      |         |            |            |            |            |
|--------------------------|------|---------|------------|------------|------------|------------|
| TRINITY_DN4441_c0_g1_i1  | dmso | control | 0,54573065 | 3,7378315  | 0,00940631 | 0,04425866 |
| TRINITY_DN1693_c0_g1_i1  | dmso | control | 0,54553507 | 4,00842578 | 0,00673401 | 0,03399955 |
| TRINITY_DN2798_c0_g1_i1  | dmso | control | 0,54540034 | 5,65825723 | 0,0001622  | 0,00157778 |
| TRINITY_DN5051_c0_g1_i1  | dmso | control | 0,54512151 | 5,703795   | 0,00909917 | 0,04303328 |
| TRINITY_DN6684_c0_g1_i1  | dmso | control | 0,54500309 | 5,67290548 | 0,00047392 | 0,0039527  |
| TRINITY_DN16013_c0_g1_i1 | dmso | control | 0,54435422 | 4,53277583 | 0,00065108 | 0,00518742 |
| TRINITY_DN7167_c0_g1_i1  | dmso | control | 0,54429533 | 4,2095257  | 0,00533409 | 0,02837971 |
| TRINITY_DN21239_c0_g1_i1 | dmso | control | 0,54418176 | 4,7061509  | 0,00414527 | 0,02328995 |
| TRINITY_DN2813_c0_g1_i1  | dmso | control | 0,54388196 | 8,59915831 | 5,37E-07   | 9,98E-06   |
| TRINITY_DN3098_c0_g1_i1  | dmso | control | 0,54362863 | 3,28383934 | 0,02413321 | 0,0910796  |
| TRINITY_DN2014_c0_g1_i1  | dmso | control | 0,54291969 | 3,48787266 | 0,01417603 | 0,06065544 |
| TRINITY_DN406_c0_g1_i1   | dmso | control | 0,54287303 | 7,28807654 | 4,14E-05   | 0,00048502 |
| TRINITY_DN3275_c0_g1_i1  | dmso | control | 0,54262875 | 6,93990595 | 2,05E-06   | 3,33E-05   |
| TRINITY_DN20485_c0_g1_i1 | dmso | control | 0,54249162 | 3,64179205 | 0,00406141 | 0,02292579 |
| TRINITY_DN6031_c0_g1_i1  | dmso | control | 0,54227507 | 4,83115699 | 0,00036517 | 0,00316054 |
| TRINITY_DN12708_c0_g1_i1 | dmso | control | 0,54216576 | 3,14530709 | 0,01044355 | 0,04805896 |
| TRINITY_DN338_c0_g1_i1   | dmso | control | 0,54179622 | 8,7236038  | 2,05E-06   | 3,32E-05   |
| TRINITY_DN6517_c0_g1_i1  | dmso | control | 0,54148973 | 7,87363539 | 7,90E-07   | 1,42E-05   |
| TRINITY_DN5655_c0_g1_i1  | dmso | control | 0,54118376 | 4,80416619 | 0,00101788 | 0,00750934 |
| TRINITY_DN18868_c0_g1_i1 | dmso | control | 0,54071661 | 3,7614006  | 0,00357747 | 0,02081946 |
| TRINITY_DN6671_c0_g1_i1  | dmso | control | 0,54008081 | 8,31847528 | 4,72E-07   | 8,90E-06   |
| TRINITY_DN1106_c0_g1_i1  | dmso | control | 0,53930723 | 7,16111405 | 2,11E-06   | 3,42E-05   |
| TRINITY_DN19682_c0_g1_i1 | dmso | control | 0,53872365 | 4,76780676 | 0,00113443 | 0,008247   |
| TRINITY_DN11601_c0_g1_i1 | dmso | control | 0,53835939 | 5,36302888 | 0,01371363 | 0,0592739  |
| TRINITY_DN6204_c0_g1_i1  | dmso | control | 0,53820509 | 4,26104641 | 0,00304881 | 0,01835765 |
| TRINITY_DN11154_c0_g1_i1 | dmso | control | 0,53800392 | 4,95286144 | 0,00035362 | 0,00308521 |
| TRINITY_DN4657_c0_g1_i1  | dmso | control | 0,53784254 | 7,87362023 | 6,25E-06   | 9,13E-05   |
| TRINITY_DN2373_c0_g1_i1  | dmso | control | 0,53763355 | 5,26737362 | 0,00045825 | 0,00384847 |
| TRINITY_DN20498_c0_g1_i1 | dmso | control | 0,53710099 | 3,26950718 | 0,0071894  | 0,03583537 |
| TRINITY_DN3308_c0_g1_i1  | dmso | control | 0,5370848  | 4,64688559 | 0,0013193  | 0,00935098 |
| TRINITY_DN8783_c0_g1_i1  | dmso | control | 0,53704273 | 3,36026494 | 0,00636908 | 0,03258992 |

|                          |      |         |            |            |            |            |
|--------------------------|------|---------|------------|------------|------------|------------|
| TRINITY_DN577_c0_g1_i1   | dmso | control | 0,53604908 | 6,98839994 | 1,78E-06   | 2,96E-05   |
| TRINITY_DN8941_c0_g1_i1  | dmso | control | 0,5355148  | 2,94032708 | 0,02193552 | 0,0847951  |
| TRINITY_DN153_c0_g1_i1   | dmso | control | 0,53540093 | 6,1079395  | 0,00016631 | 0,00161018 |
| TRINITY_DN5491_c0_g1_i1  | dmso | control | 0,53532836 | 4,98744497 | 0,0013186  | 0,00935062 |
| TRINITY_DN21091_c0_g1_i1 | dmso | control | 0,53471663 | 3,78714197 | 0,00456636 | 0,02521449 |
| TRINITY_DN2687_c0_g1_i1  | dmso | control | 0,53459055 | 4,73776973 | 0,00071089 | 0,00557176 |
| TRINITY_DN6116_c0_g1_i1  | dmso | control | 0,53457781 | 6,19974958 | 0,00131178 | 0,00931593 |
| TRINITY_DN2192_c0_g1_i1  | dmso | control | 0,53406673 | 5,01267002 | 0,00029981 | 0,00268323 |
| TRINITY_DN6553_c0_g1_i1  | dmso | control | 0,53369863 | 3,62067348 | 0,00459708 | 0,02533568 |
| TRINITY_DN5230_c0_g1_i1  | dmso | control | 0,53328518 | 5,72469044 | 7,63E-05   | 0,00082843 |
| TRINITY_DN10836_c0_g1_i1 | dmso | control | 0,53291801 | 6,98081499 | 0,00047144 | 0,00394323 |
| TRINITY_DN11515_c0_g1_i1 | dmso | control | 0,53275574 | 5,51886975 | 0,00015558 | 0,00152264 |
| TRINITY_DN9284_c0_g1_i1  | dmso | control | 0,53250343 | 6,26207295 | 1,37E-05   | 0,00018445 |
| TRINITY_DN2110_c0_g1_i1  | dmso | control | 0,53196588 | 5,22786368 | 0,00235308 | 0,01487537 |
| TRINITY_DN13028_c0_g1_i1 | dmso | control | 0,5319374  | 3,76364288 | 0,00742518 | 0,03676952 |
| TRINITY_DN20321_c0_g1_i1 | dmso | control | 0,53151865 | 3,69775159 | 0,00482997 | 0,02625852 |
| TRINITY_DN4952_c0_g1_i1  | dmso | control | 0,53105937 | 4,8866067  | 0,0003617  | 0,00313425 |
| TRINITY_DN3532_c0_g1_i1  | dmso | control | 0,53029405 | 3,20797687 | 0,01175362 | 0,05267793 |
| TRINITY_DN39368_c0_g1_i1 | dmso | control | 0,53020467 | 3,02388997 | 0,01301358 | 0,05712089 |
| TRINITY_DN13357_c0_g1_i1 | dmso | control | 0,52990027 | 3,0267706  | 0,01506582 | 0,06359608 |
| TRINITY_DN1735_c0_g1_i1  | dmso | control | 0,52973282 | 4,4505156  | 0,020457   | 0,08054004 |
| TRINITY_DN20917_c0_g1_i1 | dmso | control | 0,52967497 | 3,7674081  | 0,00552158 | 0,02918378 |
| TRINITY_DN19434_c0_g1_i1 | dmso | control | 0,52942486 | 4,60515686 | 0,00464269 | 0,02549226 |
| TRINITY_DN6307_c0_g1_i1  | dmso | control | 0,52942437 | 3,82180528 | 0,00446562 | 0,02477186 |
| TRINITY_DN30588_c0_g1_i1 | dmso | control | 0,52939143 | 3,72398715 | 0,01041406 | 0,04793855 |
| TRINITY_DN3136_c0_g1_i1  | dmso | control | 0,52914844 | 4,19989454 | 0,00198707 | 0,01299374 |
| TRINITY_DN9175_c0_g1_i1  | dmso | control | 0,52895226 | 2,84141708 | 0,01689173 | 0,06953642 |
| TRINITY_DN19379_c0_g1_i1 | dmso | control | 0,52823831 | 3,7281451  | 0,00609261 | 0,03151012 |
| TRINITY_DN1039_c0_g1_i1  | dmso | control | 0,5281598  | 5,49372932 | 0,00226689 | 0,01442524 |
| TRINITY_DN685_c0_g1_i1   | dmso | control | 0,52811676 | 6,13587693 | 0,00494263 | 0,02673016 |
| TRINITY_DN3508_c0_g1_i1  | dmso | control | 0,52773138 | 4,85233083 | 0,0026868  | 0,01653454 |

|                          |      |         |            |            |            |            |
|--------------------------|------|---------|------------|------------|------------|------------|
| TRINITY_DN20084_c0_g1_i1 | dmso | control | 0,52746975 | 3,54358299 | 0,00545609 | 0,0289223  |
| TRINITY_DN6670_c0_g1_i1  | dmso | control | 0,52626863 | 4,7612323  | 0,00556268 | 0,02933657 |
| TRINITY_DN4431_c0_g1_i1  | dmso | control | 0,5251847  | 5,14239177 | 0,00021341 | 0,00199145 |
| TRINITY_DN5837_c0_g1_i1  | dmso | control | 0,52511631 | 4,69117267 | 0,00226276 | 0,0144053  |
| TRINITY_DN5865_c0_g1_i1  | dmso | control | 0,52498107 | 5,61956243 | 4,18E-05   | 0,00049001 |
| TRINITY_DN12291_c0_g1_i1 | dmso | control | 0,52369636 | 4,4732005  | 0,00530753 | 0,02826141 |
| TRINITY_DN5446_c0_g1_i1  | dmso | control | 0,52368997 | 6,11317893 | 1,54E-05   | 0,00020484 |
| TRINITY_DN6890_c0_g1_i1  | dmso | control | 0,52350615 | 5,26364598 | 0,00261595 | 0,01619694 |
| TRINITY_DN7872_c0_g1_i1  | dmso | control | 0,52242806 | 4,80263177 | 0,00266275 | 0,01643738 |
| TRINITY_DN3597_c0_g1_i1  | dmso | control | 0,52241964 | 4,27018891 | 0,00275065 | 0,01685038 |
| TRINITY_DN3381_c0_g1_i1  | dmso | control | 0,5212603  | 5,19708769 | 0,00035578 | 0,00310153 |
| TRINITY_DN10861_c0_g1_i1 | dmso | control | 0,52110191 | 7,10144926 | 6,20E-06   | 9,07E-05   |
| TRINITY_DN2212_c0_g1_i1  | dmso | control | 0,51976686 | 4,72911639 | 0,00095363 | 0,007086   |
| TRINITY_DN5535_c0_g1_i1  | dmso | control | 0,51935024 | 6,03836325 | 0,00121315 | 0,00871838 |
| TRINITY_DN686_c0_g1_i1   | dmso | control | 0,51926412 | 5,42555528 | 0,00013736 | 0,00137315 |
| TRINITY_DN9382_c0_g1_i1  | dmso | control | 0,51836628 | 3,5151847  | 0,01878233 | 0,07544792 |
| TRINITY_DN6371_c0_g1_i1  | dmso | control | 0,51810312 | 4,48296398 | 0,00369365 | 0,02133339 |
| TRINITY_DN5510_c0_g1_i1  | dmso | control | 0,51806444 | 5,03616233 | 0,0007669  | 0,0059399  |
| TRINITY_DN5773_c0_g1_i1  | dmso | control | 0,51766195 | 5,03511729 | 0,00041904 | 0,00355639 |
| TRINITY_DN2754_c0_g1_i1  | dmso | control | 0,51742243 | 4,96423272 | 0,00112935 | 0,00821423 |
| TRINITY_DN6615_c0_g1_i1  | dmso | control | 0,51660751 | 3,64133742 | 0,01915746 | 0,07661392 |
| TRINITY_DN15164_c0_g1_i1 | dmso | control | 0,5165485  | 3,52421812 | 0,00740673 | 0,03672851 |
| TRINITY_DN8575_c0_g1_i1  | dmso | control | 0,5163073  | 3,65372867 | 0,00698892 | 0,03499303 |
| TRINITY_DN6240_c0_g1_i1  | dmso | control | 0,51592508 | 4,38512073 | 0,01200603 | 0,05362619 |
| TRINITY_DN13714_c0_g1_i1 | dmso | control | 0,51553459 | 2,89340737 | 0,01897151 | 0,07603869 |
| TRINITY_DN2318_c0_g1_i1  | dmso | control | 0,51525153 | 2,97625622 | 0,02417393 | 0,09115284 |
| TRINITY_DN5703_c0_g1_i1  | dmso | control | 0,51507825 | 5,75176236 | 0,00011681 | 0,00119585 |
| TRINITY_DN21584_c0_g1_i1 | dmso | control | 0,51504491 | 4,54163219 | 0,00116481 | 0,00841701 |
| TRINITY_DN2265_c0_g1_i1  | dmso | control | 0,51467593 | 4,70922352 | 0,00481656 | 0,02621525 |
| TRINITY_DN2164_c0_g1_i1  | dmso | control | 0,51391415 | 4,98280914 | 0,00042884 | 0,00362891 |
| TRINITY_DN1785_c0_g1_i1  | dmso | control | 0,51338951 | 3,97397572 | 0,01181412 | 0,05289986 |

|                          |      |         |            |            |            |            |
|--------------------------|------|---------|------------|------------|------------|------------|
| TRINITY_DN4566_c0_g1_i1  | dmso | control | 0,51325453 | 5,57030642 | 0,00010208 | 0,00106315 |
| TRINITY_DN19681_c0_g1_i1 | dmso | control | 0,51290855 | 5,49158809 | 0,00026209 | 0,0023826  |
| TRINITY_DN34224_c0_g1_i1 | dmso | control | 0,51273595 | 5,1375833  | 0,00666999 | 0,03375891 |
| TRINITY_DN1338_c0_g1_i1  | dmso | control | 0,51257166 | 6,37380759 | 1,12E-05   | 0,00015489 |
| TRINITY_DN1743_c0_g1_i1  | dmso | control | 0,51214377 | 3,46366724 | 0,01296428 | 0,05700729 |
| TRINITY_DN10611_c0_g1_i1 | dmso | control | 0,51211718 | 3,07399417 | 0,01353931 | 0,05887277 |
| TRINITY_DN4683_c0_g1_i1  | dmso | control | 0,51209444 | 9,02833112 | 0,00038203 | 0,0032867  |
| TRINITY_DN18094_c0_g1_i1 | dmso | control | 0,51200698 | 3,82079626 | 0,01701286 | 0,06993477 |
| TRINITY_DN1098_c0_g1_i1  | dmso | control | 0,51177635 | 8,14574099 | 8,60E-05   | 0,00091654 |
| TRINITY_DN2347_c0_g1_i1  | dmso | control | 0,51143171 | 3,05770028 | 0,01368906 | 0,05920548 |
| TRINITY_DN5722_c0_g1_i1  | dmso | control | 0,51090632 | 6,30461327 | 9,73E-05   | 0,0010235  |
| TRINITY_DN8054_c0_g1_i1  | dmso | control | 0,50950373 | 4,35130275 | 0,00470657 | 0,02577192 |
| TRINITY_DN2427_c0_g1_i1  | dmso | control | 0,50905816 | 7,46553125 | 1,93E-05   | 0,00024889 |
| TRINITY_DN15980_c0_g1_i1 | dmso | control | 0,50890602 | 3,58856569 | 0,00770393 | 0,03782571 |
| TRINITY_DN6723_c0_g1_i1  | dmso | control | 0,50846311 | 5,01551647 | 0,00127767 | 0,00913211 |
| TRINITY_DN11393_c0_g1_i1 | dmso | control | 0,5084534  | 4,33111524 | 0,00229826 | 0,01456067 |
| TRINITY_DN1277_c0_g1_i1  | dmso | control | 0,5079948  | 3,1616306  | 0,02325564 | 0,08857235 |
| TRINITY_DN19823_c0_g1_i1 | dmso | control | 0,50749017 | 3,88608146 | 0,00492456 | 0,02666242 |
| TRINITY_DN13155_c0_g1_i1 | dmso | control | 0,50744506 | 3,66313423 | 0,01205962 | 0,05378242 |
| TRINITY_DN4674_c0_g1_i1  | dmso | control | 0,50668586 | 6,06951885 | 0,00894317 | 0,04252276 |
| TRINITY_DN12108_c0_g1_i1 | dmso | control | 0,50665102 | 3,96305785 | 0,00655368 | 0,03333375 |
| TRINITY_DN21270_c0_g1_i1 | dmso | control | 0,50639485 | 3,75334799 | 0,01129954 | 0,05118276 |
| TRINITY_DN19259_c0_g1_i1 | dmso | control | 0,50608447 | 4,63944749 | 0,00114861 | 0,00831665 |
| TRINITY_DN21277_c0_g1_i1 | dmso | control | 0,5054313  | 2,76167673 | 0,02223348 | 0,08564338 |
| TRINITY_DN5376_c0_g1_i1  | dmso | control | 0,50504916 | 5,65266505 | 8,24E-05   | 0,0008821  |
| TRINITY_DN1491_c0_g1_i1  | dmso | control | 0,50391918 | 6,24739061 | 9,80E-05   | 0,00102831 |
| TRINITY_DN2060_c0_g1_i1  | dmso | control | 0,50388885 | 4,26421741 | 0,00822065 | 0,03986148 |
| TRINITY_DN1537_c0_g1_i1  | dmso | control | 0,5034482  | 5,31295269 | 0,00576635 | 0,03019874 |
| TRINITY_DN10946_c0_g1_i1 | dmso | control | 0,50305072 | 6,29185292 | 0,00183142 | 0,0121968  |
| TRINITY_DN12823_c0_g1_i1 | dmso | control | 0,50266689 | 5,05087172 | 0,00063963 | 0,005116   |
| TRINITY_DN6631_c0_g1_i1  | dmso | control | 0,5026244  | 5,03242074 | 0,00473661 | 0,02587831 |

|                          |      |         |            |            |            |            |
|--------------------------|------|---------|------------|------------|------------|------------|
| TRINITY_DN7459_c0_g1_i1  | dmso | control | 0,50257911 | 6,46934109 | 2,69E-05   | 0,00033287 |
| TRINITY_DN7009_c0_g1_i1  | dmso | control | 0,50217345 | 5,35460241 | 0,00192112 | 0,01266574 |
| TRINITY_DN13369_c0_g1_i1 | dmso | control | 0,50193274 | 6,86227887 | 1,20E-05   | 0,000166   |
| TRINITY_DN2089_c0_g1_i1  | dmso | control | 0,50105601 | 4,62012781 | 0,00313976 | 0,01882682 |
| TRINITY_DN9249_c0_g1_i1  | dmso | control | 0,50081908 | 4,32358023 | 0,00386652 | 0,02208922 |
| TRINITY_DN6358_c0_g1_i1  | dmso | control | 0,50023988 | 3,74040245 | 0,00646116 | 0,03295601 |
| TRINITY_DN1929_c0_g1_i1  | dmso | control | 0,500177   | 3,94109754 | 0,00554242 | 0,02926181 |
| TRINITY_DN5583_c0_g1_i1  | dmso | control | 0,49981092 | 4,6429155  | 0,00562668 | 0,02960923 |
| TRINITY_DN22912_c0_g1_i1 | dmso | control | 0,49955207 | 7,94649532 | 0,0041218  | 0,02318512 |
| TRINITY_DN635_c0_g1_i1   | dmso | control | 0,49942131 | 3,16527778 | 0,02680993 | 0,09857086 |
| TRINITY_DN566_c0_g1_i1   | dmso | control | 0,49935843 | 6,72401593 | 2,11E-05   | 0,00026886 |
| TRINITY_DN1371_c0_g1_i1  | dmso | control | 0,49922666 | 6,53210108 | 0,00012984 | 0,00130604 |
| TRINITY_DN1249_c0_g1_i1  | dmso | control | 0,49919285 | 5,51869705 | 0,00037849 | 0,00326402 |
| TRINITY_DN11343_c0_g1_i1 | dmso | control | 0,49906223 | 4,88880319 | 0,00163043 | 0,01109353 |
| TRINITY_DN7444_c0_g1_i1  | dmso | control | 0,49871457 | 4,05639894 | 0,00868185 | 0,04154911 |
| TRINITY_DN11692_c0_g1_i1 | dmso | control | 0,49855475 | 5,34530074 | 0,00056861 | 0,00462477 |
| TRINITY_DN12975_c0_g1_i1 | dmso | control | 0,49851741 | 3,92287209 | 0,00496282 | 0,02680924 |
| TRINITY_DN12884_c0_g1_i1 | dmso | control | 0,49810532 | 3,27986288 | 0,0125532  | 0,05565716 |
| TRINITY_DN13326_c0_g1_i1 | dmso | control | 0,49804483 | 5,66165801 | 0,00024028 | 0,00220793 |
| TRINITY_DN11261_c0_g1_i1 | dmso | control | 0,49784114 | 5,08781419 | 0,00179391 | 0,01200236 |
| TRINITY_DN47808_c0_g1_i1 | dmso | control | 0,49769465 | 3,96490895 | 0,00495118 | 0,02676636 |
| TRINITY_DN6330_c0_g1_i1  | dmso | control | 0,49636069 | 4,47562088 | 0,01573764 | 0,06579745 |
| TRINITY_DN962_c0_g1_i1   | dmso | control | 0,49603096 | 5,11027352 | 0,00958187 | 0,04492378 |
| TRINITY_DN3159_c0_g1_i1  | dmso | control | 0,49599274 | 3,21445156 | 0,01424247 | 0,06084961 |
| TRINITY_DN205_c0_g1_i1   | dmso | control | 0,49573082 | 5,6598125  | 0,00018139 | 0,00173296 |
| TRINITY_DN6751_c0_g1_i1  | dmso | control | 0,49551103 | 3,58440348 | 0,00959095 | 0,04495176 |
| TRINITY_DN2899_c0_g1_i1  | dmso | control | 0,4945907  | 5,71908945 | 0,00144323 | 0,010047   |
| TRINITY_DN10780_c0_g1_i1 | dmso | control | 0,49434151 | 8,55052187 | 0,0003434  | 0,00301057 |
| TRINITY_DN22106_c0_g1_i1 | dmso | control | 0,49404347 | 5,02041415 | 0,00533686 | 0,028384   |
| TRINITY_DN12395_c0_g1_i1 | dmso | control | 0,4928418  | 4,40811054 | 0,01306032 | 0,05727272 |
| TRINITY_DN14382_c0_g1_i1 | dmso | control | 0,49251211 | 3,30045538 | 0,02074479 | 0,08134051 |



|                          |      |         |            |            |            |            |
|--------------------------|------|---------|------------|------------|------------|------------|
| TRINITY_DN7744_c0_g1_i1  | dmso | control | 0,49229937 | 3,96171902 | 0,00805693 | 0,03922561 |
| TRINITY_DN1956_c0_g1_i1  | dmso | control | 0,49116631 | 4,56463471 | 0,00153896 | 0,01060098 |
| TRINITY_DN12218_c0_g1_i1 | dmso | control | 0,49106664 | 3,40937453 | 0,01107507 | 0,05034699 |
| TRINITY_DN11099_c0_g1_i1 | dmso | control | 0,49083417 | 5,61441554 | 0,00015246 | 0,00149715 |
| TRINITY_DN5763_c0_g1_i1  | dmso | control | 0,48943114 | 4,83349951 | 0,003101   | 0,01862533 |
| TRINITY_DN14753_c0_g1_i1 | dmso | control | 0,4892872  | 6,15460333 | 0,00019499 | 0,00184573 |
| TRINITY_DN3594_c0_g1_i1  | dmso | control | 0,48832649 | 2,99829387 | 0,02426613 | 0,09135372 |
| TRINITY_DN1707_c0_g1_i1  | dmso | control | 0,48830799 | 6,37492973 | 0,00647646 | 0,03300652 |
| TRINITY_DN1578_c0_g1_i1  | dmso | control | 0,48808517 | 6,92942591 | 0,00014926 | 0,00147372 |
| TRINITY_DN12987_c0_g1_i1 | dmso | control | 0,48769821 | 4,05568633 | 0,01046021 | 0,04808967 |
| TRINITY_DN20380_c0_g1_i1 | dmso | control | 0,4865866  | 5,55201024 | 0,00025236 | 0,00230722 |
| TRINITY_DN2741_c0_g1_i1  | dmso | control | 0,48650649 | 3,5554958  | 0,01950353 | 0,07769676 |
| TRINITY_DN6603_c0_g1_i1  | dmso | control | 0,48572079 | 4,96279025 | 0,00647791 | 0,03300652 |
| TRINITY_DN14128_c0_g1_i1 | dmso | control | 0,48559876 | 3,6932453  | 0,00948347 | 0,04457816 |
| TRINITY_DN13563_c0_g1_i1 | dmso | control | 0,48534381 | 3,8138332  | 0,01521203 | 0,06406351 |
| TRINITY_DN2062_c0_g1_i1  | dmso | control | 0,48479846 | 6,07401746 | 0,0002268  | 0,00210415 |
| TRINITY_DN18638_c0_g1_i1 | dmso | control | 0,48462526 | 3,32069224 | 0,02487463 | 0,09318308 |
| TRINITY_DN9179_c0_g1_i1  | dmso | control | 0,48452891 | 3,68182211 | 0,01318117 | 0,05766264 |
| TRINITY_DN12867_c0_g1_i1 | dmso | control | 0,48395167 | 3,80851216 | 0,00877876 | 0,04192037 |
| TRINITY_DN3549_c0_g1_i1  | dmso | control | 0,4833551  | 4,87267419 | 0,00136057 | 0,00958702 |
| TRINITY_DN43130_c0_g1_i1 | dmso | control | 0,48284904 | 4,69643189 | 0,01543804 | 0,06478865 |
| TRINITY_DN11789_c0_g1_i1 | dmso | control | 0,48233128 | 5,33515846 | 0,001288   | 0,00918774 |
| TRINITY_DN1406_c0_g1_i1  | dmso | control | 0,48185453 | 4,03072013 | 0,0058437  | 0,03047374 |
| TRINITY_DN7583_c0_g1_i1  | dmso | control | 0,4812482  | 4,89947753 | 0,00203379 | 0,01325127 |
| TRINITY_DN1481_c0_g1_i1  | dmso | control | 0,48079036 | 5,38709234 | 0,00078684 | 0,0060845  |
| TRINITY_DN426_c0_g1_i1   | dmso | control | 0,48075175 | 8,06318796 | 1,68E-05   | 0,00021944 |
| TRINITY_DN1256_c0_g1_i1  | dmso | control | 0,48004215 | 6,64016887 | 3,71E-05   | 0,00044168 |
| TRINITY_DN3494_c0_g1_i1  | dmso | control | 0,47985186 | 4,05184831 | 0,00586725 | 0,03058193 |
| TRINITY_DN4851_c0_g1_i1  | dmso | control | 0,47981244 | 4,86993157 | 0,00131171 | 0,00931593 |
| TRINITY_DN12394_c0_g1_i1 | dmso | control | 0,47927729 | 5,66787823 | 0,00092645 | 0,00691608 |
| TRINITY_DN54638_c0_g1_i1 | dmso | control | 0,47861579 | 4,18519717 | 0,00563578 | 0,02964633 |

|                          |      |         |            |            |            |            |
|--------------------------|------|---------|------------|------------|------------|------------|
| TRINITY_DN7494_c0_g1_i1  | dmso | control | 0,47855407 | 5,76940471 | 0,01440184 | 0,06130744 |
| TRINITY_DN35063_c0_g1_i1 | dmso | control | 0,47839897 | 3,49433815 | 0,02600912 | 0,09633377 |
| TRINITY_DN5942_c0_g1_i1  | dmso | control | 0,47779883 | 5,4474914  | 0,00047009 | 0,00393423 |
| TRINITY_DN13120_c0_g1_i1 | dmso | control | 0,4772983  | 3,5994243  | 0,01177173 | 0,05272638 |
| TRINITY_DN5437_c0_g1_i1  | dmso | control | 0,47720019 | 8,97473777 | 0,00046986 | 0,00393423 |
| TRINITY_DN5918_c0_g1_i1  | dmso | control | 0,47691936 | 5,57205941 | 0,00038267 | 0,00329025 |
| TRINITY_DN19596_c0_g1_i1 | dmso | control | 0,4767351  | 3,36257598 | 0,02305682 | 0,08808669 |
| TRINITY_DN20418_c0_g1_i1 | dmso | control | 0,47645996 | 5,1494466  | 0,01177092 | 0,05272638 |
| TRINITY_DN679_c0_g1_i1   | dmso | control | 0,47644789 | 6,58476072 | 5,25E-05   | 0,00059805 |
| TRINITY_DN21083_c0_g1_i1 | dmso | control | 0,4763671  | 3,75900267 | 0,01137738 | 0,05143858 |
| TRINITY_DN5972_c0_g1_i1  | dmso | control | 0,47541788 | 4,80455462 | 0,00190198 | 0,01257799 |
| TRINITY_DN11502_c0_g1_i1 | dmso | control | 0,47520314 | 5,09907201 | 0,00083295 | 0,00637623 |
| TRINITY_DN2148_c0_g1_i1  | dmso | control | 0,4748765  | 5,36371922 | 0,00048884 | 0,00405592 |
| TRINITY_DN12321_c0_g1_i1 | dmso | control | 0,47466165 | 4,2550513  | 0,0133658  | 0,0582586  |
| TRINITY_DN818_c0_g1_i1   | dmso | control | 0,47464179 | 4,34332986 | 0,00405136 | 0,02287799 |
| TRINITY_DN37533_c0_g1_i1 | dmso | control | 0,47392459 | 4,82720682 | 0,00174611 | 0,01174234 |
| TRINITY_DN12834_c0_g1_i1 | dmso | control | 0,47383161 | 3,10005119 | 0,02610344 | 0,0966088  |
| TRINITY_DN20641_c0_g1_i1 | dmso | control | 0,4734274  | 3,00982168 | 0,02417491 | 0,09115284 |
| TRINITY_DN300_c0_g1_i1   | dmso | control | 0,47321261 | 4,70247652 | 0,00317958 | 0,01901038 |
| TRINITY_DN6627_c0_g1_i1  | dmso | control | 0,47282426 | 4,26390189 | 0,00497806 | 0,02688155 |
| TRINITY_DN894_c0_g1_i1   | dmso | control | 0,4728237  | 5,85323046 | 0,00037129 | 0,00321151 |
| TRINITY_DN8399_c0_g1_i1  | dmso | control | 0,4727875  | 4,92974548 | 0,00239001 | 0,01508243 |
| TRINITY_DN13877_c0_g1_i1 | dmso | control | 0,47270758 | 4,34030459 | 0,00365711 | 0,02116463 |
| TRINITY_DN2304_c0_g1_i1  | dmso | control | 0,47250416 | 4,2878295  | 0,00502787 | 0,02704937 |
| TRINITY_DN1770_c0_g1_i1  | dmso | control | 0,47173215 | 9,18741293 | 1,06E-05   | 0,00014689 |
| TRINITY_DN10323_c0_g1_i1 | dmso | control | 0,4716344  | 3,9058526  | 0,01097394 | 0,05000985 |
| TRINITY_DN13599_c0_g1_i1 | dmso | control | 0,47079955 | 4,69994996 | 0,00336748 | 0,01983012 |
| TRINITY_DN11030_c0_g1_i1 | dmso | control | 0,47065842 | 8,30751636 | 2,01E-05   | 0,00025767 |
| TRINITY_DN12114_c0_g1_i1 | dmso | control | 0,46935666 | 3,78894262 | 0,02641018 | 0,09741957 |
| TRINITY_DN26645_c0_g1_i1 | dmso | control | 0,46925975 | 4,01750241 | 0,01421194 | 0,06075508 |
| TRINITY_DN5848_c0_g1_i1  | dmso | control | 0,46919102 | 5,28313812 | 0,00185212 | 0,01231196 |

|                          |      |         |            |            |            |            |
|--------------------------|------|---------|------------|------------|------------|------------|
| TRINITY_DN5472_c0_g1_i1  | dmso | control | 0,46885874 | 6,9425923  | 0,00010258 | 0,00106679 |
| TRINITY_DN540_c0_g1_i1   | dmso | control | 0,46882734 | 4,16647968 | 0,00604863 | 0,03135001 |
| TRINITY_DN3765_c0_g1_i1  | dmso | control | 0,46871627 | 5,06681179 | 0,00107037 | 0,00786848 |
| TRINITY_DN20638_c0_g1_i1 | dmso | control | 0,46871106 | 4,62043077 | 0,00267152 | 0,01647744 |
| TRINITY_DN372_c0_g1_i1   | dmso | control | 0,46801517 | 5,19945269 | 0,00325027 | 0,01934493 |
| TRINITY_DN21155_c0_g1_i1 | dmso | control | 0,46794493 | 5,03573181 | 0,00669323 | 0,03384232 |
| TRINITY_DN19598_c0_g1_i1 | dmso | control | 0,46771896 | 5,75825245 | 0,00336422 | 0,01981901 |
| TRINITY_DN6139_c0_g1_i1  | dmso | control | 0,46758557 | 5,31458793 | 0,0022934  | 0,0145554  |
| TRINITY_DN11885_c0_g1_i1 | dmso | control | 0,46750425 | 4,72523534 | 0,00224234 | 0,01431606 |
| TRINITY_DN1525_c0_g1_i1  | dmso | control | 0,46705907 | 3,7861453  | 0,01312619 | 0,05750918 |
| TRINITY_DN430_c0_g1_i1   | dmso | control | 0,46702537 | 5,15855599 | 0,00209695 | 0,01356187 |
| TRINITY_DN594_c0_g1_i1   | dmso | control | 0,46607284 | 8,08083054 | 0,00083137 | 0,00636749 |
| TRINITY_DN471_c0_g1_i1   | dmso | control | 0,46600234 | 6,6632659  | 0,00089333 | 0,00673495 |
| TRINITY_DN5018_c0_g1_i1  | dmso | control | 0,46521133 | 5,77837222 | 0,00023782 | 0,00218977 |
| TRINITY_DN9109_c0_g1_i1  | dmso | control | 0,46397766 | 4,05628823 | 0,01283705 | 0,05658566 |
| TRINITY_DN2358_c0_g1_i1  | dmso | control | 0,46357263 | 3,39070934 | 0,02406124 | 0,09094024 |
| TRINITY_DN1074_c0_g1_i1  | dmso | control | 0,46312574 | 7,32482693 | 5,02E-05   | 0,00057642 |
| TRINITY_DN7681_c0_g1_i1  | dmso | control | 0,46198451 | 5,45745711 | 0,00103048 | 0,0075984  |
| TRINITY_DN13073_c0_g1_i1 | dmso | control | 0,46157698 | 4,89211854 | 0,00208691 | 0,01353025 |
| TRINITY_DN13881_c0_g1_i1 | dmso | control | 0,46070482 | 4,05990982 | 0,02266654 | 0,08693285 |
| TRINITY_DN2242_c0_g1_i1  | dmso | control | 0,46009942 | 5,27680364 | 0,00105061 | 0,007735   |
| TRINITY_DN4817_c0_g1_i1  | dmso | control | 0,45995535 | 7,19866311 | 0,00095068 | 0,00707862 |
| TRINITY_DN1168_c0_g1_i1  | dmso | control | 0,45983182 | 4,52414534 | 0,00842932 | 0,04069572 |
| TRINITY_DN1635_c0_g1_i1  | dmso | control | 0,45904983 | 4,49533632 | 0,01896971 | 0,07603869 |
| TRINITY_DN23253_c0_g1_i1 | dmso | control | 0,45869208 | 3,93429513 | 0,01658158 | 0,06851286 |
| TRINITY_DN5175_c0_g1_i1  | dmso | control | 0,45852446 | 6,68526255 | 0,00478635 | 0,02607045 |
| TRINITY_DN20304_c0_g1_i1 | dmso | control | 0,4583517  | 3,89681147 | 0,01083832 | 0,04954416 |
| TRINITY_DN2777_c0_g1_i1  | dmso | control | 0,458325   | 4,30425902 | 0,00729547 | 0,03628893 |
| TRINITY_DN5270_c0_g1_i1  | dmso | control | 0,45823825 | 6,3876103  | 8,69E-05   | 0,00092314 |
| TRINITY_DN2975_c0_g1_i1  | dmso | control | 0,45793942 | 3,67944501 | 0,01508554 | 0,06360583 |
| TRINITY_DN1443_c0_g1_i1  | dmso | control | 0,45789244 | 6,75418062 | 7,99E-05   | 0,00086244 |

|                          |      |         |            |            |            |            |
|--------------------------|------|---------|------------|------------|------------|------------|
| TRINITY_DN15691_c0_g1_i1 | dmso | control | 0,45779046 | 3,60989399 | 0,01687538 | 0,06950809 |
| TRINITY_DN1655_c0_g1_i1  | dmso | control | 0,45727017 | 5,9513083  | 0,00229231 | 0,0145549  |
| TRINITY_DN2743_c0_g1_i1  | dmso | control | 0,45714333 | 3,83495013 | 0,01161128 | 0,05220506 |
| TRINITY_DN13344_c0_g1_i1 | dmso | control | 0,45701137 | 4,86022252 | 0,00681759 | 0,03431362 |
| TRINITY_DN12314_c0_g1_i1 | dmso | control | 0,45670491 | 3,90259295 | 0,01728488 | 0,07081112 |
| TRINITY_DN11474_c0_g1_i1 | dmso | control | 0,45660486 | 5,1188237  | 0,00148631 | 0,01030218 |
| TRINITY_DN2504_c0_g1_i1  | dmso | control | 0,45576067 | 7,46855716 | 0,01101888 | 0,05016316 |
| TRINITY_DN6644_c0_g1_i1  | dmso | control | 0,45534087 | 4,09327902 | 0,02061125 | 0,08101482 |
| TRINITY_DN12734_c0_g1_i1 | dmso | control | 0,45478274 | 6,81952736 | 0,00287545 | 0,01750154 |
| TRINITY_DN1988_c0_g1_i1  | dmso | control | 0,45459597 | 7,95216533 | 4,36E-05   | 0,00050828 |
| TRINITY_DN6904_c0_g1_i1  | dmso | control | 0,45382626 | 3,93773741 | 0,01403436 | 0,06024211 |
| TRINITY_DN1043_c0_g1_i1  | dmso | control | 0,45374407 | 7,84471191 | 0,00067625 | 0,00535255 |
| TRINITY_DN7669_c0_g1_i1  | dmso | control | 0,45349292 | 4,97943544 | 0,00185936 | 0,01233736 |
| TRINITY_DN892_c0_g1_i1   | dmso | control | 0,45338533 | 7,68071772 | 3,31E-05   | 0,0003982  |
| TRINITY_DN1272_c0_g1_i1  | dmso | control | 0,4533038  | 4,57283451 | 0,00609193 | 0,03151012 |
| TRINITY_DN33117_c0_g1_i1 | dmso | control | 0,45326342 | 3,65492428 | 0,0168386  | 0,06945561 |
| TRINITY_DN33741_c0_g1_i1 | dmso | control | 0,45257359 | 7,70204459 | 0,00011145 | 0,00114828 |
| TRINITY_DN19002_c0_g1_i1 | dmso | control | 0,45243294 | 4,75043927 | 0,01626132 | 0,06757452 |
| TRINITY_DN13215_c0_g1_i1 | dmso | control | 0,45049676 | 4,30353383 | 0,01233471 | 0,05485679 |
| TRINITY_DN11199_c0_g1_i1 | dmso | control | 0,45024567 | 5,66929556 | 0,0126646  | 0,0560822  |
| TRINITY_DN12109_c0_g1_i1 | dmso | control | 0,44995738 | 3,74025472 | 0,01410338 | 0,06045204 |
| TRINITY_DN12773_c0_g1_i1 | dmso | control | 0,44992132 | 4,16199189 | 0,00872816 | 0,04173396 |
| TRINITY_DN20201_c0_g1_i1 | dmso | control | 0,44964116 | 4,02738971 | 0,01161196 | 0,05220506 |
| TRINITY_DN2276_c0_g1_i1  | dmso | control | 0,44957689 | 5,08165049 | 0,0044715  | 0,0247854  |
| TRINITY_DN12863_c0_g1_i1 | dmso | control | 0,44952158 | 4,25160439 | 0,01116795 | 0,05066614 |
| TRINITY_DN6179_c0_g1_i1  | dmso | control | 0,44932558 | 5,14402396 | 0,00341565 | 0,02007287 |
| TRINITY_DN5494_c0_g1_i1  | dmso | control | 0,44932084 | 6,02328868 | 0,00180309 | 0,01204627 |
| TRINITY_DN1094_c0_g1_i1  | dmso | control | 0,44909807 | 3,89316661 | 0,01298449 | 0,05703633 |
| TRINITY_DN955_c0_g1_i1   | dmso | control | 0,44869932 | 5,10873631 | 0,00368058 | 0,0212749  |
| TRINITY_DN24498_c0_g1_i1 | dmso | control | 0,44858141 | 3,93759298 | 0,02187393 | 0,08466478 |
| TRINITY_DN20814_c0_g1_i1 | dmso | control | 0,44678902 | 4,29198361 | 0,01410822 | 0,06045482 |

|                          |      |         |            |            |            |            |
|--------------------------|------|---------|------------|------------|------------|------------|
| TRINITY_DN14645_c0_g1_i1 | dmso | control | 0,4466107  | 3,52234421 | 0,02415867 | 0,09113919 |
| TRINITY_DN4810_c0_g1_i1  | dmso | control | 0,44635747 | 5,75454204 | 0,00263258 | 0,01627896 |
| TRINITY_DN12025_c0_g1_i1 | dmso | control | 0,44630716 | 4,67133397 | 0,00420423 | 0,02354793 |
| TRINITY_DN1510_c0_g1_i1  | dmso | control | 0,44567432 | 6,34202054 | 0,00180465 | 0,01204627 |
| TRINITY_DN20395_c0_g1_i1 | dmso | control | 0,4455169  | 9,24017398 | 2,38E-05   | 0,00029843 |
| TRINITY_DN2843_c0_g1_i1  | dmso | control | 0,44549493 | 4,44322902 | 0,00511523 | 0,02742797 |
| TRINITY_DN20003_c0_g1_i1 | dmso | control | 0,44473036 | 4,73511662 | 0,00639167 | 0,03268238 |
| TRINITY_DN987_c0_g1_i1   | dmso | control | 0,44468903 | 5,39620436 | 0,01039496 | 0,04789806 |
| TRINITY_DN14198_c0_g1_i1 | dmso | control | 0,44424217 | 5,64701988 | 0,00259769 | 0,01611774 |
| TRINITY_DN1582_c0_g1_i1  | dmso | control | 0,44353582 | 7,53650927 | 0,00283403 | 0,01727323 |
| TRINITY_DN12334_c0_g1_i1 | dmso | control | 0,44329847 | 4,42453777 | 0,0088602  | 0,04220265 |
| TRINITY_DN11619_c0_g1_i1 | dmso | control | 0,44312694 | 5,49123812 | 0,00097939 | 0,00725504 |
| TRINITY_DN19429_c0_g1_i1 | dmso | control | 0,44204594 | 5,52091665 | 0,00523258 | 0,02793222 |
| TRINITY_DN5123_c0_g1_i1  | dmso | control | 0,44181456 | 6,00779606 | 0,00043527 | 0,00367259 |
| TRINITY_DN727_c0_g1_i1   | dmso | control | 0,44133743 | 6,48074184 | 0,00180413 | 0,01204627 |
| TRINITY_DN6112_c0_g1_i1  | dmso | control | 0,44099519 | 4,69521048 | 0,00439782 | 0,02443328 |
| TRINITY_DN6012_c0_g1_i1  | dmso | control | 0,44065917 | 4,97821059 | 0,00464197 | 0,02549226 |
| TRINITY_DN2071_c0_g1_i1  | dmso | control | 0,43970187 | 7,62623038 | 0,00078962 | 0,00609949 |
| TRINITY_DN4391_c0_g1_i1  | dmso | control | 0,43949542 | 4,7005676  | 0,00512702 | 0,02747813 |
| TRINITY_DN2761_c0_g1_i1  | dmso | control | 0,43903649 | 5,2460298  | 0,00276582 | 0,01692894 |
| TRINITY_DN11376_c0_g1_i1 | dmso | control | 0,43786779 | 3,63494242 | 0,02348212 | 0,08926297 |
| TRINITY_DN432_c0_g1_i1   | dmso | control | 0,43764116 | 8,04758544 | 0,00477807 | 0,02603514 |
| TRINITY_DN1915_c0_g1_i1  | dmso | control | 0,43758572 | 5,35322828 | 0,00215891 | 0,01391588 |
| TRINITY_DN10910_c0_g1_i1 | dmso | control | 0,43713296 | 5,82767062 | 0,00715215 | 0,03573601 |
| TRINITY_DN5976_c0_g1_i1  | dmso | control | 0,43698086 | 3,90837414 | 0,01911794 | 0,07649826 |
| TRINITY_DN43928_c0_g1_i1 | dmso | control | 0,43691387 | 7,53441896 | 0,00015331 | 0,0015034  |
| TRINITY_DN11993_c0_g1_i1 | dmso | control | 0,43610816 | 6,29785141 | 0,00348327 | 0,02041212 |
| TRINITY_DN1122_c0_g1_i1  | dmso | control | 0,43610037 | 6,40919562 | 0,00224832 | 0,01433863 |
| TRINITY_DN29811_c0_g1_i1 | dmso | control | 0,43576146 | 7,51606185 | 0,00239414 | 0,01509528 |
| TRINITY_DN12009_c0_g1_i1 | dmso | control | 0,4356351  | 6,20292587 | 0,00679363 | 0,03422878 |
| TRINITY_DN21427_c0_g1_i1 | dmso | control | 0,43499126 | 3,54097882 | 0,0224798  | 0,08645388 |

|                          |      |         |            |            |            |            |
|--------------------------|------|---------|------------|------------|------------|------------|
| TRINITY_DN9484_c0_g1_i1  | dmso | control | 0,43470233 | 5,24037751 | 0,00333472 | 0,01970678 |
| TRINITY_DN33523_c0_g1_i1 | dmso | control | 0,43450721 | 3,76011464 | 0,02526967 | 0,09427179 |
| TRINITY_DN6115_c0_g1_i1  | dmso | control | 0,43395284 | 7,11090057 | 0,00023626 | 0,00218064 |
| TRINITY_DN4065_c0_g1_i1  | dmso | control | 0,43383324 | 3,77923624 | 0,0269726  | 0,09906411 |
| TRINITY_DN1598_c0_g1_i1  | dmso | control | 0,43335982 | 4,33949597 | 0,02576388 | 0,09564617 |
| TRINITY_DN21726_c0_g1_i1 | dmso | control | 0,43301553 | 4,96866905 | 0,01205504 | 0,05377858 |
| TRINITY_DN1343_c0_g1_i1  | dmso | control | 0,43269315 | 4,49146938 | 0,0143721  | 0,06126776 |
| TRINITY_DN1751_c0_g1_i1  | dmso | control | 0,4326168  | 4,91583824 | 0,00379049 | 0,02174487 |
| TRINITY_DN6260_c0_g1_i1  | dmso | control | 0,4324449  | 7,01636744 | 0,00038149 | 0,00328601 |
| TRINITY_DN8292_c0_g1_i1  | dmso | control | 0,43243443 | 4,32818857 | 0,01374009 | 0,05935277 |
| TRINITY_DN5929_c0_g1_i1  | dmso | control | 0,43230544 | 6,98178595 | 0,00014256 | 0,00141632 |
| TRINITY_DN5800_c0_g1_i1  | dmso | control | 0,43205939 | 6,01326614 | 0,0190412  | 0,07625453 |
| TRINITY_DN23968_c0_g1_i1 | dmso | control | 0,43178143 | 3,84762315 | 0,01773736 | 0,07224456 |
| TRINITY_DN6025_c0_g1_i1  | dmso | control | 0,431564   | 5,28993231 | 0,0020896  | 0,01353558 |
| TRINITY_DN1504_c0_g1_i1  | dmso | control | 0,43089142 | 7,09352653 | 0,00015002 | 0,00147918 |
| TRINITY_DN6186_c0_g1_i1  | dmso | control | 0,43061291 | 5,57931216 | 0,00831258 | 0,04021272 |
| TRINITY_DN5505_c0_g1_i1  | dmso | control | 0,42997991 | 5,75987681 | 0,0022951  | 0,01455985 |
| TRINITY_DN3825_c0_g1_i1  | dmso | control | 0,42995662 | 8,0932714  | 0,00055479 | 0,00452765 |
| TRINITY_DN19282_c0_g1_i1 | dmso | control | 0,42951486 | 4,7196989  | 0,01378249 | 0,05948254 |
| TRINITY_DN2127_c0_g1_i1  | dmso | control | 0,42935557 | 5,00675925 | 0,00310436 | 0,01862885 |
| TRINITY_DN11767_c0_g1_i1 | dmso | control | 0,42932561 | 6,17215126 | 0,00038622 | 0,00331485 |
| TRINITY_DN18701_c0_g1_i1 | dmso | control | 0,42839635 | 4,98396438 | 0,00380067 | 0,02177574 |
| TRINITY_DN5180_c0_g1_i1  | dmso | control | 0,42833583 | 7,62732146 | 0,00319952 | 0,01910587 |
| TRINITY_DN1411_c0_g1_i1  | dmso | control | 0,42832986 | 5,15483087 | 0,01776432 | 0,07232402 |
| TRINITY_DN1260_c0_g1_i1  | dmso | control | 0,42765964 | 4,22194643 | 0,01381325 | 0,0595797  |
| TRINITY_DN1046_c0_g1_i1  | dmso | control | 0,42725126 | 4,84275953 | 0,00848683 | 0,0408641  |
| TRINITY_DN3657_c0_g1_i1  | dmso | control | 0,42721967 | 5,60876273 | 0,00219336 | 0,01408433 |
| TRINITY_DN638_c0_g1_i1   | dmso | control | 0,42707012 | 7,65538376 | 9,64E-05   | 0,00101522 |
| TRINITY_DN11945_c0_g1_i1 | dmso | control | 0,42702961 | 7,16132827 | 0,00020849 | 0,00195309 |
| TRINITY_DN2996_c0_g1_i1  | dmso | control | 0,42632842 | 3,85820353 | 0,02615772 | 0,09673534 |
| TRINITY_DN4828_c0_g1_i1  | dmso | control | 0,42604357 | 6,9140941  | 0,0001607  | 0,00156952 |

|                          |      |         |            |            |            |            |
|--------------------------|------|---------|------------|------------|------------|------------|
| TRINITY_DN4298_c0_g1_i1  | dmso | control | 0,42589812 | 5,48066938 | 0,00129792 | 0,00924023 |
| TRINITY_DN15853_c0_g1_i1 | dmso | control | 0,42572693 | 4,18483523 | 0,01622335 | 0,06745718 |
| TRINITY_DN22130_c0_g1_i1 | dmso | control | 0,42527893 | 4,12632648 | 0,01385965 | 0,0596907  |
| TRINITY_DN2920_c0_g1_i1  | dmso | control | 0,42524191 | 4,51290083 | 0,01403773 | 0,06024211 |
| TRINITY_DN13444_c0_g1_i1 | dmso | control | 0,42508356 | 4,42981419 | 0,02242727 | 0,08627481 |
| TRINITY_DN11155_c0_g1_i1 | dmso | control | 0,4250702  | 4,08763341 | 0,0158087  | 0,06605631 |
| TRINITY_DN22902_c0_g1_i1 | dmso | control | 0,42506103 | 4,52635209 | 0,00800997 | 0,039076   |
| TRINITY_DN532_c0_g1_i1   | dmso | control | 0,42437652 | 6,80508635 | 0,00425343 | 0,0237682  |
| TRINITY_DN54685_c0_g1_i1 | dmso | control | 0,4243269  | 4,07667973 | 0,01670955 | 0,06896269 |
| TRINITY_DN10366_c0_g1_i1 | dmso | control | 0,42408578 | 3,84728    | 0,02193572 | 0,0847951  |
| TRINITY_DN759_c0_g1_i1   | dmso | control | 0,42396683 | 7,1119107  | 0,00086754 | 0,00658171 |
| TRINITY_DN12714_c0_g1_i1 | dmso | control | 0,42389137 | 6,10208266 | 0,0039054  | 0,02227141 |
| TRINITY_DN8223_c0_g1_i1  | dmso | control | 0,42386508 | 3,74012869 | 0,02071515 | 0,08129049 |
| TRINITY_DN4622_c0_g1_i1  | dmso | control | 0,42345089 | 6,83526915 | 0,00032448 | 0,00287197 |
| TRINITY_DN7773_c0_g1_i1  | dmso | control | 0,42340611 | 3,9169643  | 0,02480903 | 0,09296381 |
| TRINITY_DN10805_c0_g1_i1 | dmso | control | 0,42315322 | 6,09547818 | 0,00053915 | 0,00441751 |
| TRINITY_DN5965_c0_g1_i1  | dmso | control | 0,42311365 | 5,85067639 | 0,00073775 | 0,0057511  |
| TRINITY_DN3164_c0_g1_i1  | dmso | control | 0,4226406  | 4,03582741 | 0,0242602  | 0,09135372 |
| TRINITY_DN12277_c0_g1_i1 | dmso | control | 0,4224362  | 5,8353577  | 0,00908058 | 0,04299039 |
| TRINITY_DN12269_c0_g1_i1 | dmso | control | 0,42216121 | 5,68942385 | 0,00100017 | 0,00739001 |
| TRINITY_DN5788_c0_g1_i1  | dmso | control | 0,42135467 | 6,64581835 | 0,00258171 | 0,016033   |
| TRINITY_DN10753_c0_g1_i1 | dmso | control | 0,42132269 | 6,46062445 | 0,00080006 | 0,00616037 |
| TRINITY_DN5055_c0_g1_i1  | dmso | control | 0,42091434 | 7,49741733 | 0,00176877 | 0,01187259 |
| TRINITY_DN10911_c0_g1_i1 | dmso | control | 0,42085224 | 6,62211598 | 0,00054313 | 0,00444254 |
| TRINITY_DN5344_c0_g1_i1  | dmso | control | 0,42039764 | 4,41647715 | 0,01603571 | 0,06683087 |
| TRINITY_DN19066_c0_g1_i1 | dmso | control | 0,41985872 | 5,23552565 | 0,00714899 | 0,03573259 |
| TRINITY_DN12454_c0_g1_i1 | dmso | control | 0,41970873 | 6,06303044 | 0,00282484 | 0,01723178 |
| TRINITY_DN9356_c0_g1_i1  | dmso | control | 0,4193654  | 6,93034761 | 0,00036395 | 0,00315184 |
| TRINITY_DN19580_c0_g1_i1 | dmso | control | 0,41891978 | 5,569233   | 0,00172756 | 0,01164467 |
| TRINITY_DN15024_c0_g1_i1 | dmso | control | 0,41891729 | 4,6408271  | 0,01725304 | 0,07074087 |
| TRINITY_DN1430_c0_g1_i1  | dmso | control | 0,41701243 | 4,55856908 | 0,02443159 | 0,09183303 |

|                          |      |         |            |            |            |            |
|--------------------------|------|---------|------------|------------|------------|------------|
| TRINITY_DN11919_c0_g1_i1 | dmso | control | 0,41697464 | 3,84541694 | 0,02386753 | 0,09046616 |
| TRINITY_DN6881_c0_g1_i1  | dmso | control | 0,41668603 | 4,82969034 | 0,0062099  | 0,03197935 |
| TRINITY_DN13016_c0_g1_i1 | dmso | control | 0,41660633 | 3,97618738 | 0,0173887  | 0,07113732 |
| TRINITY_DN19201_c0_g1_i1 | dmso | control | 0,41652091 | 6,97347196 | 0,00030376 | 0,00271192 |
| TRINITY_DN16322_c0_g1_i1 | dmso | control | 0,41623349 | 6,71753411 | 0,01356609 | 0,05890057 |
| TRINITY_DN17202_c0_g1_i1 | dmso | control | 0,41579796 | 4,90537414 | 0,00853523 | 0,04101638 |
| TRINITY_DN6771_c0_g1_i1  | dmso | control | 0,41562852 | 5,88669053 | 0,00185566 | 0,0123278  |
| TRINITY_DN1085_c0_g1_i1  | dmso | control | 0,41532216 | 5,31857671 | 0,0033279  | 0,01967723 |
| TRINITY_DN7030_c0_g1_i1  | dmso | control | 0,41529023 | 4,13944591 | 0,0185327  | 0,07471529 |
| TRINITY_DN18875_c0_g1_i1 | dmso | control | 0,41458892 | 9,88630132 | 0,00156297 | 0,01073564 |
| TRINITY_DN14175_c0_g1_i1 | dmso | control | 0,41446557 | 3,91805584 | 0,02662931 | 0,09812764 |
| TRINITY_DN11538_c0_g1_i1 | dmso | control | 0,41417865 | 7,04065635 | 0,00050496 | 0,00416811 |
| TRINITY_DN5735_c0_g1_i1  | dmso | control | 0,41409956 | 5,32514939 | 0,00434126 | 0,02417485 |
| TRINITY_DN1437_c0_g1_i1  | dmso | control | 0,41409859 | 4,73116008 | 0,00729274 | 0,03628783 |
| TRINITY_DN73_c0_g1_i1    | dmso | control | 0,41394544 | 5,36150023 | 0,00498088 | 0,02688669 |
| TRINITY_DN7567_c0_g1_i1  | dmso | control | 0,41360483 | 4,3573687  | 0,01871851 | 0,07529628 |
| TRINITY_DN5481_c0_g1_i1  | dmso | control | 0,4134763  | 5,71190083 | 0,00207776 | 0,01348693 |
| TRINITY_DN6844_c0_g1_i1  | dmso | control | 0,41327093 | 6,03254322 | 0,01613434 | 0,06716443 |
| TRINITY_DN2100_c0_g1_i1  | dmso | control | 0,41304448 | 5,30206848 | 0,00738463 | 0,03665668 |
| TRINITY_DN5198_c0_g1_i1  | dmso | control | 0,41245777 | 5,76525347 | 0,00169706 | 0,01147121 |
| TRINITY_DN6270_c0_g1_i1  | dmso | control | 0,41228248 | 4,42207434 | 0,01251392 | 0,05558535 |
| TRINITY_DN4847_c0_g1_i1  | dmso | control | 0,41179949 | 9,31391348 | 0,00018574 | 0,00177101 |
| TRINITY_DN4680_c0_g1_i1  | dmso | control | 0,41169103 | 7,83981147 | 0,00016992 | 0,00164178 |
| TRINITY_DN1415_c0_g1_i1  | dmso | control | 0,41111988 | 6,71974035 | 0,00032413 | 0,00287071 |
| TRINITY_DN18981_c0_g1_i1 | dmso | control | 0,41109995 | 7,21291396 | 0,00231843 | 0,01466917 |
| TRINITY_DN13560_c0_g1_i1 | dmso | control | 0,41044846 | 5,838514   | 0,00104224 | 0,00767731 |
| TRINITY_DN18998_c0_g1_i1 | dmso | control | 0,41003406 | 4,38295588 | 0,01249992 | 0,05554023 |
| TRINITY_DN7414_c0_g1_i1  | dmso | control | 0,40983902 | 4,38233926 | 0,02186674 | 0,08465962 |
| TRINITY_DN7020_c0_g1_i1  | dmso | control | 0,40912274 | 4,6853303  | 0,01981753 | 0,07877272 |
| TRINITY_DN32457_c0_g1_i1 | dmso | control | 0,40894835 | 5,53563805 | 0,00933154 | 0,04394982 |
| TRINITY_DN5685_c0_g1_i1  | dmso | control | 0,40881661 | 5,27734964 | 0,00526752 | 0,02810837 |



|                          |      |         |            |            |            |            |
|--------------------------|------|---------|------------|------------|------------|------------|
| TRINITY_DN312_c0_g1_i1   | dmso | control | 0,40862    | 6,26971101 | 0,0008657  | 0,00657123 |
| TRINITY_DN1268_c0_g1_i1  | dmso | control | 0,40833629 | 5,87012017 | 0,0011373  | 0,00825597 |
| TRINITY_DN7580_c0_g1_i1  | dmso | control | 0,40799981 | 5,53586248 | 0,0061189  | 0,03159178 |
| TRINITY_DN11662_c0_g1_i1 | dmso | control | 0,40767733 | 5,06117761 | 0,01278193 | 0,05642879 |
| TRINITY_DN1245_c0_g1_i1  | dmso | control | 0,40688869 | 4,51392823 | 0,01387514 | 0,05970073 |
| TRINITY_DN5255_c0_g1_i1  | dmso | control | 0,40645526 | 7,76066375 | 0,00071343 | 0,00558864 |
| TRINITY_DN6081_c0_g1_i1  | dmso | control | 0,40624679 | 6,64743898 | 0,00052495 | 0,00432567 |
| TRINITY_DN13640_c0_g1_i1 | dmso | control | 0,40609927 | 3,95793179 | 0,02601732 | 0,09633947 |
| TRINITY_DN1515_c0_g1_i1  | dmso | control | 0,40461528 | 5,39818337 | 0,00698517 | 0,03498639 |
| TRINITY_DN2082_c0_g1_i1  | dmso | control | 0,40450555 | 6,56064992 | 0,00630041 | 0,03230719 |
| TRINITY_DN5241_c0_g1_i1  | dmso | control | 0,4033946  | 7,08324692 | 0,00559613 | 0,02946996 |
| TRINITY_DN2809_c0_g1_i1  | dmso | control | 0,4033037  | 5,79989616 | 0,00468539 | 0,02568521 |
| TRINITY_DN444_c0_g1_i1   | dmso | control | 0,40328516 | 8,92662203 | 0,00035735 | 0,00311222 |
| TRINITY_DN10843_c0_g1_i1 | dmso | control | 0,40325852 | 5,79683531 | 0,00163827 | 0,01113116 |
| TRINITY_DN12355_c0_g1_i1 | dmso | control | 0,40275254 | 6,29476933 | 0,00366094 | 0,02117835 |
| TRINITY_DN11871_c0_g1_i1 | dmso | control | 0,40264959 | 5,53295572 | 0,0032888  | 0,01951795 |
| TRINITY_DN6375_c0_g1_i1  | dmso | control | 0,40240967 | 4,28250346 | 0,01480527 | 0,06275299 |
| TRINITY_DN19560_c0_g1_i1 | dmso | control | 0,40202641 | 6,4120042  | 0,00123135 | 0,00883598 |
| TRINITY_DN5633_c0_g1_i1  | dmso | control | 0,40169389 | 5,33139087 | 0,01646696 | 0,06813671 |
| TRINITY_DN9085_c0_g1_i1  | dmso | control | 0,40126822 | 4,03648071 | 0,02082635 | 0,08157175 |
| TRINITY_DN4826_c0_g1_i1  | dmso | control | 0,40097726 | 8,31913172 | 0,00054695 | 0,00447126 |
| TRINITY_DN19028_c0_g1_i1 | dmso | control | 0,40087731 | 4,83684167 | 0,00741571 | 0,03676042 |
| TRINITY_DN2420_c0_g1_i1  | dmso | control | 0,40084771 | 6,58012611 | 0,00066861 | 0,00530368 |
| TRINITY_DN15589_c0_g1_i1 | dmso | control | 0,40002418 | 5,31161562 | 0,0095     | 0,04464136 |
| TRINITY_DN18741_c0_g1_i1 | dmso | control | 0,39979557 | 4,15069756 | 0,02455643 | 0,09218235 |
| TRINITY_DN11372_c0_g1_i1 | dmso | control | 0,39912201 | 5,04228371 | 0,00901785 | 0,04275117 |
| TRINITY_DN45590_c0_g1_i1 | dmso | control | 0,3980418  | 4,38939896 | 0,01866155 | 0,07510898 |
| TRINITY_DN10738_c0_g1_i1 | dmso | control | 0,39787628 | 7,21971188 | 0,00034104 | 0,00299658 |
| TRINITY_DN11446_c0_g1_i1 | dmso | control | 0,39759331 | 5,22305594 | 0,00573555 | 0,03007262 |
| TRINITY_DN10944_c0_g1_i1 | dmso | control | 0,39757138 | 4,26707428 | 0,02317084 | 0,08837174 |
| TRINITY_DN12174_c0_g1_i1 | dmso | control | 0,39698243 | 5,33346526 | 0,00458935 | 0,02530272 |

|                          |      |         |            |            |            |            |
|--------------------------|------|---------|------------|------------|------------|------------|
| TRINITY_DN7666_c0_g1_i1  | dmso | control | 0,39674327 | 5,39661609 | 0,0151928  | 0,06400115 |
| TRINITY_DN5663_c0_g1_i1  | dmso | control | 0,39566034 | 4,43997893 | 0,01787758 | 0,07270317 |
| TRINITY_DN12012_c0_g1_i1 | dmso | control | 0,39478909 | 4,78237396 | 0,01041184 | 0,04793855 |
| TRINITY_DN11107_c0_g1_i1 | dmso | control | 0,39405132 | 5,66961324 | 0,0026986  | 0,01658075 |
| TRINITY_DN1761_c0_g1_i1  | dmso | control | 0,39387382 | 5,20455329 | 0,00555582 | 0,02931113 |
| TRINITY_DN1907_c0_g1_i1  | dmso | control | 0,39351071 | 7,29236909 | 0,00039091 | 0,0033452  |
| TRINITY_DN11657_c0_g1_i1 | dmso | control | 0,39307819 | 5,83993986 | 0,0060734  | 0,03144452 |
| TRINITY_DN22816_c0_g1_i1 | dmso | control | 0,39268721 | 4,40051437 | 0,01713504 | 0,07035691 |
| TRINITY_DN10816_c0_g1_i1 | dmso | control | 0,39173146 | 7,68694847 | 0,00087564 | 0,00662924 |
| TRINITY_DN1135_c0_g1_i1  | dmso | control | 0,39139534 | 6,78484289 | 0,02106241 | 0,08234007 |
| TRINITY_DN2181_c0_g1_i1  | dmso | control | 0,39108465 | 4,67998293 | 0,02579139 | 0,09572369 |
| TRINITY_DN244_c0_g1_i1   | dmso | control | 0,39072948 | 8,2676153  | 0,00031446 | 0,0027963  |
| TRINITY_DN5482_c0_g1_i1  | dmso | control | 0,39058752 | 6,12520441 | 0,00248001 | 0,015535   |
| TRINITY_DN841_c0_g1_i1   | dmso | control | 0,39042676 | 5,70158279 | 0,00324496 | 0,01932129 |
| TRINITY_DN12740_c0_g1_i1 | dmso | control | 0,39008429 | 5,37817085 | 0,0058396  | 0,03047374 |
| TRINITY_DN5354_c0_g1_i1  | dmso | control | 0,38868971 | 8,58111304 | 0,00388208 | 0,02214718 |
| TRINITY_DN2281_c0_g1_i1  | dmso | control | 0,38844399 | 4,78450614 | 0,01558426 | 0,06520098 |
| TRINITY_DN6810_c0_g1_i1  | dmso | control | 0,38825763 | 5,51878852 | 0,0038019  | 0,02177574 |
| TRINITY_DN1611_c0_g1_i1  | dmso | control | 0,38807743 | 5,97406337 | 0,01066323 | 0,04886752 |
| TRINITY_DN18971_c0_g1_i1 | dmso | control | 0,38753853 | 8,93697216 | 0,00023911 | 0,00219855 |
| TRINITY_DN40_c0_g1_i1    | dmso | control | 0,38681773 | 8,27841886 | 0,00098641 | 0,00729954 |
| TRINITY_DN14180_c0_g1_i1 | dmso | control | 0,38637753 | 4,88921266 | 0,0226363  | 0,08684765 |
| TRINITY_DN34556_c0_g1_i1 | dmso | control | 0,38624516 | 6,13899289 | 0,00660288 | 0,03350411 |
| TRINITY_DN5114_c0_g1_i1  | dmso | control | 0,38623183 | 6,18734793 | 0,026811   | 0,09857086 |
| TRINITY_DN5360_c0_g1_i1  | dmso | control | 0,38619564 | 5,68780522 | 0,00315657 | 0,01888843 |
| TRINITY_DN1570_c0_g1_i1  | dmso | control | 0,3861862  | 5,08346875 | 0,01169897 | 0,05251447 |
| TRINITY_DN6207_c0_g1_i1  | dmso | control | 0,38581352 | 5,79262738 | 0,00222625 | 0,0142293  |
| TRINITY_DN2421_c0_g1_i1  | dmso | control | 0,38508039 | 5,94694705 | 0,00346387 | 0,02031491 |
| TRINITY_DN5709_c0_g1_i1  | dmso | control | 0,38457922 | 6,28302807 | 0,01644937 | 0,0680834  |
| TRINITY_DN4181_c0_g1_i1  | dmso | control | 0,38404492 | 6,28333804 | 0,00148471 | 0,01029604 |
| TRINITY_DN19251_c0_g1_i1 | dmso | control | 0,38385027 | 4,67811748 | 0,01698964 | 0,06987909 |

|                          |      |         |            |            |            |            |
|--------------------------|------|---------|------------|------------|------------|------------|
| TRINITY_DN2147_c0_g1_i1  | dmso | control | 0,38336188 | 6,74430376 | 0,01294542 | 0,05695908 |
| TRINITY_DN2490_c0_g1_i1  | dmso | control | 0,38303551 | 6,25220062 | 0,01643885 | 0,06805937 |
| TRINITY_DN436_c0_g1_i1   | dmso | control | 0,38227673 | 9,51882404 | 0,00026311 | 0,00238734 |
| TRINITY_DN11840_c0_g1_i1 | dmso | control | 0,3820831  | 4,86028221 | 0,01834349 | 0,07412765 |
| TRINITY_DN4815_c0_g1_i1  | dmso | control | 0,38177721 | 6,99668543 | 0,00063299 | 0,00506851 |
| TRINITY_DN1483_c0_g1_i1  | dmso | control | 0,38163421 | 6,18443914 | 0,00137948 | 0,00968252 |
| TRINITY_DN6034_c0_g1_i1  | dmso | control | 0,38149449 | 5,3468234  | 0,00554117 | 0,02926181 |
| TRINITY_DN19678_c0_g1_i1 | dmso | control | 0,38142145 | 4,97812646 | 0,01920734 | 0,07670722 |
| TRINITY_DN1000_c0_g1_i1  | dmso | control | 0,381055   | 7,75831161 | 0,00226942 | 0,01443494 |
| TRINITY_DN11170_c0_g1_i1 | dmso | control | 0,38075114 | 6,08675799 | 0,02278243 | 0,08724606 |
| TRINITY_DN5318_c0_g1_i1  | dmso | control | 0,38028637 | 6,18279499 | 0,00659302 | 0,03348668 |
| TRINITY_DN6018_c0_g1_i1  | dmso | control | 0,38026334 | 5,0349646  | 0,01529332 | 0,06433082 |
| TRINITY_DN10912_c0_g1_i1 | dmso | control | 0,38016103 | 5,50413466 | 0,00472282 | 0,02584132 |
| TRINITY_DN3730_c0_g1_i1  | dmso | control | 0,38014443 | 5,59618896 | 0,01492391 | 0,06312618 |
| TRINITY_DN28596_c0_g1_i1 | dmso | control | 0,37835603 | 6,36718649 | 0,00326115 | 0,01940168 |
| TRINITY_DN7067_c0_g1_i1  | dmso | control | 0,37682934 | 5,85388666 | 0,00255598 | 0,01588689 |
| TRINITY_DN20624_c0_g1_i1 | dmso | control | 0,3765444  | 6,32533752 | 0,00203143 | 0,01324188 |
| TRINITY_DN6211_c0_g1_i1  | dmso | control | 0,37617972 | 6,56877674 | 0,00418278 | 0,02345505 |
| TRINITY_DN3018_c0_g1_i1  | dmso | control | 0,37607776 | 8,28507514 | 0,00135621 | 0,00956095 |
| TRINITY_DN30689_c0_g1_i1 | dmso | control | 0,37546203 | 8,37238013 | 0,0015038  | 0,01039471 |
| TRINITY_DN8217_c0_g1_i1  | dmso | control | 0,37533288 | 5,24816153 | 0,01711269 | 0,07028512 |
| TRINITY_DN14560_c0_g1_i1 | dmso | control | 0,37516435 | 5,58876933 | 0,00764866 | 0,03764851 |
| TRINITY_DN311_c0_g1_i1   | dmso | control | 0,37482358 | 8,34619785 | 0,00076243 | 0,00591798 |
| TRINITY_DN20456_c0_g1_i1 | dmso | control | 0,37447579 | 4,30318119 | 0,02353086 | 0,08940118 |
| TRINITY_DN1601_c0_g1_i1  | dmso | control | 0,37440598 | 4,44020051 | 0,02409925 | 0,09100101 |
| TRINITY_DN5543_c0_g1_i1  | dmso | control | 0,3742936  | 6,43238527 | 0,00245525 | 0,01540662 |
| TRINITY_DN5387_c0_g1_i1  | dmso | control | 0,37424522 | 6,74410938 | 0,00989002 | 0,04611405 |
| TRINITY_DN32418_c0_g1_i1 | dmso | control | 0,37417505 | 5,09455494 | 0,01720257 | 0,07055397 |
| TRINITY_DN18668_c0_g1_i1 | dmso | control | 0,37384977 | 6,07131502 | 0,00757681 | 0,03736669 |
| TRINITY_DN9975_c0_g1_i1  | dmso | control | 0,37380167 | 4,79510051 | 0,02718555 | 0,09974479 |
| TRINITY_DN4967_c0_g1_i1  | dmso | control | 0,37348306 | 6,59113189 | 0,00161598 | 0,01104204 |

|                          |      |         |            |            |            |            |
|--------------------------|------|---------|------------|------------|------------|------------|
| TRINITY_DN11900_c0_g1_i1 | dmso | control | 0,37325519 | 5,06474216 | 0,00985831 | 0,04598102 |
| TRINITY_DN2136_c0_g1_i1  | dmso | control | 0,37325383 | 5,22054523 | 0,0082705  | 0,0400613  |
| TRINITY_DN1329_c0_g1_i1  | dmso | control | 0,3732322  | 6,01392195 | 0,00677633 | 0,0341633  |
| TRINITY_DN1738_c0_g1_i1  | dmso | control | 0,37287028 | 7,08373544 | 0,00132098 | 0,0093583  |
| TRINITY_DN1259_c0_g1_i1  | dmso | control | 0,37268819 | 7,94147077 | 0,00548852 | 0,02904091 |
| TRINITY_DN11205_c0_g1_i1 | dmso | control | 0,37264684 | 5,49182798 | 0,00515357 | 0,02760225 |
| TRINITY_DN11960_c0_g1_i1 | dmso | control | 0,37257664 | 6,38542286 | 0,00404074 | 0,02285375 |
| TRINITY_DN11121_c0_g1_i1 | dmso | control | 0,37170757 | 5,86058218 | 0,0150185  | 0,0634705  |
| TRINITY_DN1712_c0_g1_i1  | dmso | control | 0,37170205 | 5,85024776 | 0,00298643 | 0,01802717 |
| TRINITY_DN13653_c0_g1_i1 | dmso | control | 0,37150906 | 4,98884888 | 0,01302651 | 0,05715917 |
| TRINITY_DN2958_c0_g1_i1  | dmso | control | 0,37002032 | 5,34535896 | 0,01014653 | 0,04699153 |
| TRINITY_DN1452_c0_g1_i1  | dmso | control | 0,36991099 | 8,94990792 | 0,00111537 | 0,00812075 |
| TRINITY_DN17132_c0_g1_i1 | dmso | control | 0,36989702 | 4,57949087 | 0,02030607 | 0,08012052 |
| TRINITY_DN4988_c0_g1_i1  | dmso | control | 0,36920573 | 5,71429291 | 0,00447141 | 0,0247854  |
| TRINITY_DN315_c0_g1_i1   | dmso | control | 0,36882246 | 6,80182184 | 0,00140846 | 0,00984765 |
| TRINITY_DN6773_c0_g1_i1  | dmso | control | 0,36878333 | 4,4813784  | 0,02317426 | 0,08837174 |
| TRINITY_DN935_c0_g1_i1   | dmso | control | 0,3683302  | 6,423002   | 0,00250239 | 0,01565485 |
| TRINITY_DN18910_c0_g1_i1 | dmso | control | 0,36785669 | 4,35146321 | 0,02540433 | 0,09467637 |
| TRINITY_DN234_c0_g1_i1   | dmso | control | 0,3670496  | 7,17825989 | 0,00095346 | 0,007086   |
| TRINITY_DN5486_c0_g1_i1  | dmso | control | 0,36693298 | 6,71402606 | 0,00148727 | 0,0103039  |
| TRINITY_DN24887_c0_g1_i1 | dmso | control | 0,36682969 | 6,65318027 | 0,00950974 | 0,04467258 |
| TRINITY_DN18680_c0_g1_i1 | dmso | control | 0,36615248 | 6,36478658 | 0,00548837 | 0,02904091 |
| TRINITY_DN1108_c0_g1_i1  | dmso | control | 0,36571076 | 6,34110729 | 0,00215673 | 0,01390802 |
| TRINITY_DN5246_c0_g1_i1  | dmso | control | 0,36553312 | 7,70776029 | 0,00081322 | 0,00624837 |
| TRINITY_DN3420_c0_g1_i1  | dmso | control | 0,36549237 | 9,1432278  | 0,00085959 | 0,00655235 |
| TRINITY_DN2360_c0_g1_i1  | dmso | control | 0,36461213 | 5,26344828 | 0,02335575 | 0,08887613 |
| TRINITY_DN6166_c0_g1_i1  | dmso | control | 0,36429376 | 5,25390202 | 0,01067906 | 0,04892453 |
| TRINITY_DN144_c0_g1_i1   | dmso | control | 0,36327288 | 7,16520805 | 0,00217357 | 0,01397918 |
| TRINITY_DN8466_c0_g1_i1  | dmso | control | 0,36297493 | 6,68965567 | 0,00319718 | 0,01909978 |
| TRINITY_DN5514_c0_g1_i1  | dmso | control | 0,36287062 | 6,68986966 | 0,00162133 | 0,01105768 |
| TRINITY_DN5406_c0_g1_i1  | dmso | control | 0,36218056 | 8,06537742 | 0,00140722 | 0,00984375 |

|                          |      |         |            |            |            |            |
|--------------------------|------|---------|------------|------------|------------|------------|
| TRINITY_DN1796_c0_g1_i1  | dmso | control | 0,36168254 | 4,98333792 | 0,01633691 | 0,06775221 |
| TRINITY_DN4775_c0_g1_i1  | dmso | control | 0,3612701  | 7,18111698 | 0,00297011 | 0,01794362 |
| TRINITY_DN33661_c0_g1_i1 | dmso | control | 0,3611068  | 6,53393447 | 0,00621897 | 0,03201461 |
| TRINITY_DN1308_c0_g1_i1  | dmso | control | 0,36098551 | 5,40215803 | 0,00897986 | 0,04263518 |
| TRINITY_DN12284_c0_g1_i1 | dmso | control | 0,36076776 | 6,22322785 | 0,01275218 | 0,05635519 |
| TRINITY_DN1803_c0_g1_i1  | dmso | control | 0,36027021 | 6,12655341 | 0,01281049 | 0,05652031 |
| TRINITY_DN8_c0_g1_i1     | dmso | control | 0,3596183  | 7,23270823 | 0,00168673 | 0,01141209 |
| TRINITY_DN5530_c0_g1_i1  | dmso | control | 0,35900154 | 5,83694148 | 0,00492375 | 0,02666242 |
| TRINITY_DN2275_c0_g1_i1  | dmso | control | 0,35835647 | 7,92417998 | 0,00118291 | 0,00853278 |
| TRINITY_DN1539_c0_g1_i1  | dmso | control | 0,35736203 | 5,46604918 | 0,00930454 | 0,04387989 |
| TRINITY_DN2333_c0_g1_i1  | dmso | control | 0,35722416 | 7,35141776 | 0,00204481 | 0,01331107 |
| TRINITY_DN32359_c0_g1_i1 | dmso | control | 0,35696888 | 5,57806181 | 0,01104935 | 0,05025435 |
| TRINITY_DN13269_c0_g1_i1 | dmso | control | 0,35694648 | 6,22437145 | 0,00283771 | 0,01728838 |
| TRINITY_DN215_c0_g1_i1   | dmso | control | 0,35686986 | 7,65766513 | 0,0011475  | 0,00831272 |
| TRINITY_DN12247_c0_g1_i1 | dmso | control | 0,35493363 | 5,96694843 | 0,00482775 | 0,02625633 |
| TRINITY_DN10725_c0_g1_i1 | dmso | control | 0,35445836 | 9,01621215 | 0,00141986 | 0,00992253 |
| TRINITY_DN983_c0_g1_i1   | dmso | control | 0,35363224 | 8,29551714 | 0,00212403 | 0,01372782 |
| TRINITY_DN5456_c0_g1_i1  | dmso | control | 0,35341641 | 5,49248077 | 0,0077751  | 0,03810944 |
| TRINITY_DN1864_c0_g1_i1  | dmso | control | 0,3534002  | 4,77701619 | 0,02194191 | 0,0847951  |
| TRINITY_DN14808_c0_g1_i1 | dmso | control | 0,35203382 | 4,83919601 | 0,0249758  | 0,09344707 |
| TRINITY_DN20886_c0_g1_i1 | dmso | control | 0,35185095 | 5,53231825 | 0,02152877 | 0,08368758 |
| TRINITY_DN136_c0_g1_i1   | dmso | control | 0,35139227 | 7,7897841  | 0,0046721  | 0,02563176 |
| TRINITY_DN16697_c0_g1_i1 | dmso | control | 0,35136691 | 5,18661888 | 0,02617133 | 0,09676091 |
| TRINITY_DN21852_c0_g1_i1 | dmso | control | 0,35121161 | 5,61694092 | 0,01937734 | 0,07730066 |
| TRINITY_DN2210_c0_g1_i1  | dmso | control | 0,35110219 | 5,50867782 | 0,00836471 | 0,04043783 |
| TRINITY_DN26616_c0_g1_i1 | dmso | control | 0,3503933  | 5,76761689 | 0,00771491 | 0,03786674 |
| TRINITY_DN4890_c0_g1_i1  | dmso | control | 0,34937316 | 5,85086228 | 0,00577762 | 0,03021641 |
| TRINITY_DN11090_c0_g1_i1 | dmso | control | 0,34898128 | 5,07704443 | 0,01449987 | 0,06160312 |
| TRINITY_DN786_c0_g1_i1   | dmso | control | 0,3483214  | 8,35118787 | 0,0019395  | 0,01273456 |
| TRINITY_DN249_c0_g1_i1   | dmso | control | 0,34822088 | 8,02053946 | 0,00353441 | 0,0206448  |
| TRINITY_DN20372_c0_g1_i1 | dmso | control | 0,3474711  | 4,6069674  | 0,02542909 | 0,09470259 |

|                          |      |         |            |            |            |            |
|--------------------------|------|---------|------------|------------|------------|------------|
| TRINITY_DN6444_c0_g1_i1  | dmso | control | 0,34638794 | 5,70795093 | 0,02069718 | 0,08124206 |
| TRINITY_DN5492_c0_g1_i1  | dmso | control | 0,34607886 | 9,33749444 | 0,00201077 | 0,01313091 |
| TRINITY_DN6288_c0_g1_i1  | dmso | control | 0,34468175 | 6,26010164 | 0,00815577 | 0,03966296 |
| TRINITY_DN11269_c0_g1_i1 | dmso | control | 0,34434675 | 5,96114606 | 0,00681714 | 0,03431362 |
| TRINITY_DN6193_c0_g1_i1  | dmso | control | 0,34381771 | 7,7859246  | 0,00177476 | 0,01190116 |
| TRINITY_DN19280_c0_g1_i1 | dmso | control | 0,34355539 | 5,28007331 | 0,01421795 | 0,06076281 |
| TRINITY_DN5870_c0_g1_i1  | dmso | control | 0,34338082 | 6,60694982 | 0,00643277 | 0,03284599 |
| TRINITY_DN14061_c0_g1_i1 | dmso | control | 0,34232068 | 7,04407145 | 0,02020304 | 0,07986701 |
| TRINITY_DN1307_c0_g1_i1  | dmso | control | 0,3419612  | 4,86668973 | 0,02600562 | 0,09633377 |
| TRINITY_DN7370_c0_g1_i1  | dmso | control | 0,34184634 | 7,12393147 | 0,00303371 | 0,01828201 |
| TRINITY_DN5793_c0_g1_i1  | dmso | control | 0,34104473 | 5,68849387 | 0,01259922 | 0,05582693 |
| TRINITY_DN2019_c0_g1_i1  | dmso | control | 0,34080495 | 7,17501011 | 0,00608    | 0,03146741 |
| TRINITY_DN23671_c0_g1_i1 | dmso | control | 0,33989726 | 5,27888884 | 0,01438649 | 0,06129318 |
| TRINITY_DN881_c0_g1_i1   | dmso | control | 0,33980669 | 6,40030361 | 0,00329199 | 0,01952888 |
| TRINITY_DN132_c0_g1_i1   | dmso | control | 0,33948865 | 7,79532887 | 0,00709011 | 0,03546284 |
| TRINITY_DN6493_c0_g1_i1  | dmso | control | 0,33941472 | 5,53228062 | 0,01166406 | 0,05239036 |
| TRINITY_DN236_c0_g1_i1   | dmso | control | 0,33912749 | 6,33672634 | 0,00454147 | 0,02511544 |
| TRINITY_DN177_c0_g1_i1   | dmso | control | 0,33905484 | 9,08759223 | 0,00841312 | 0,04063106 |
| TRINITY_DN12177_c0_g1_i1 | dmso | control | 0,33897056 | 6,31805074 | 0,00575584 | 0,03015709 |
| TRINITY_DN12045_c0_g1_i1 | dmso | control | 0,33873949 | 5,90056    | 0,01839302 | 0,07427653 |
| TRINITY_DN2623_c0_g1_i1  | dmso | control | 0,33828577 | 4,66657641 | 0,02717466 | 0,09973019 |
| TRINITY_DN33040_c0_g1_i1 | dmso | control | 0,33817524 | 6,89966451 | 0,00760812 | 0,0374955  |
| TRINITY_DN5704_c0_g1_i1  | dmso | control | 0,3372294  | 5,21999484 | 0,01543092 | 0,06477758 |
| TRINITY_DN11397_c0_g1_i1 | dmso | control | 0,33719935 | 5,83947668 | 0,00847066 | 0,04082754 |
| TRINITY_DN12197_c0_g1_i1 | dmso | control | 0,33680624 | 6,83552354 | 0,00428208 | 0,0238821  |
| TRINITY_DN18679_c0_g1_i1 | dmso | control | 0,33638254 | 7,89959159 | 0,0029498  | 0,01785919 |
| TRINITY_DN14770_c0_g1_i1 | dmso | control | 0,3358221  | 5,56668022 | 0,01024767 | 0,04736884 |
| TRINITY_DN3110_c0_g1_i1  | dmso | control | 0,3336862  | 6,29674052 | 0,01049191 | 0,04822005 |
| TRINITY_DN11066_c0_g1_i1 | dmso | control | 0,33365487 | 6,24621125 | 0,00737768 | 0,03663476 |
| TRINITY_DN585_c0_g1_i1   | dmso | control | 0,33358144 | 7,98746862 | 0,00285526 | 0,01738795 |
| TRINITY_DN12135_c0_g1_i1 | dmso | control | 0,33328324 | 6,71857373 | 0,00415791 | 0,02333375 |

|                          |      |         |            |            |            |            |
|--------------------------|------|---------|------------|------------|------------|------------|
| TRINITY_DN11267_c0_g1_i1 | dmso | control | 0,33301608 | 5,27942114 | 0,0205785  | 0,08090811 |
| TRINITY_DN12316_c0_g1_i1 | dmso | control | 0,33223565 | 6,71779969 | 0,01129151 | 0,05116242 |
| TRINITY_DN4658_c0_g1_i1  | dmso | control | 0,33220917 | 9,55321812 | 0,02670476 | 0,09830538 |
| TRINITY_DN19467_c0_g1_i1 | dmso | control | 0,3318925  | 5,66838021 | 0,01380286 | 0,05955265 |
| TRINITY_DN19012_c0_g1_i1 | dmso | control | 0,33035826 | 6,56722559 | 0,0040939  | 0,02305514 |
| TRINITY_DN12620_c0_g1_i1 | dmso | control | 0,32964838 | 5,47481677 | 0,01345995 | 0,05861592 |
| TRINITY_DN2643_c0_g1_i1  | dmso | control | 0,32958572 | 7,25916362 | 0,00321938 | 0,01920858 |
| TRINITY_DN20064_c0_g1_i1 | dmso | control | 0,32896714 | 8,79418123 | 0,00296967 | 0,01794362 |
| TRINITY_DN8095_c0_g1_i1  | dmso | control | 0,32839711 | 5,15367299 | 0,02291131 | 0,08762347 |
| TRINITY_DN2496_c0_g1_i1  | dmso | control | 0,32801191 | 5,53986773 | 0,02033758 | 0,08018403 |
| TRINITY_DN1265_c0_g1_i1  | dmso | control | 0,3279548  | 6,30911721 | 0,00739679 | 0,03669184 |
| TRINITY_DN6410_c0_g1_i1  | dmso | control | 0,32754006 | 5,35681409 | 0,01629405 | 0,06763435 |
| TRINITY_DN633_c0_g1_i1   | dmso | control | 0,32740641 | 9,09770805 | 0,00362977 | 0,02105701 |
| TRINITY_DN12097_c0_g1_i1 | dmso | control | 0,32581803 | 6,29043195 | 0,00866018 | 0,04149132 |
| TRINITY_DN6129_c0_g1_i1  | dmso | control | 0,3256172  | 6,83242556 | 0,00670175 | 0,03386036 |
| TRINITY_DN129_c0_g1_i1   | dmso | control | 0,32557002 | 8,19041515 | 0,00990473 | 0,04615282 |
| TRINITY_DN5138_c0_g1_i1  | dmso | control | 0,32506191 | 6,41567106 | 0,00519691 | 0,02775914 |
| TRINITY_DN5947_c0_g1_i1  | dmso | control | 0,32501881 | 5,87300902 | 0,01389459 | 0,05975212 |
| TRINITY_DN5370_c0_g1_i1  | dmso | control | 0,3223503  | 7,57744398 | 0,00432543 | 0,02410525 |
| TRINITY_DN3531_c0_g1_i1  | dmso | control | 0,32095148 | 6,22637525 | 0,01001857 | 0,04654815 |
| TRINITY_DN21035_c0_g1_i1 | dmso | control | 0,32036643 | 6,28957181 | 0,02165871 | 0,08407531 |
| TRINITY_DN457_c0_g1_i1   | dmso | control | 0,31948072 | 7,55734911 | 0,01228224 | 0,05464029 |
| TRINITY_DN411_c0_g1_i1   | dmso | control | 0,31902594 | 8,24261642 | 0,00295789 | 0,01789228 |
| TRINITY_DN4818_c0_g1_i1  | dmso | control | 0,31880615 | 7,35070025 | 0,00820932 | 0,03981988 |
| TRINITY_DN2357_c0_g1_i1  | dmso | control | 0,31872768 | 6,44267751 | 0,00586868 | 0,03058193 |
| TRINITY_DN10752_c0_g1_i1 | dmso | control | 0,31871145 | 8,94067548 | 0,00404934 | 0,02287799 |
| TRINITY_DN4910_c0_g1_i1  | dmso | control | 0,31768854 | 5,85747628 | 0,01135386 | 0,05135873 |
| TRINITY_DN1379_c0_g1_i1  | dmso | control | 0,31741523 | 5,59363689 | 0,01651519 | 0,06827759 |
| TRINITY_DN1016_c0_g1_i1  | dmso | control | 0,31737743 | 6,80810608 | 0,00590078 | 0,03072705 |
| TRINITY_DN6813_c0_g1_i1  | dmso | control | 0,31730036 | 5,28656424 | 0,024043   | 0,09091652 |
| TRINITY_DN5039_c0_g1_i1  | dmso | control | 0,31668415 | 8,41631992 | 0,00809723 | 0,03940853 |

|                          |      |         |            |            |            |            |
|--------------------------|------|---------|------------|------------|------------|------------|
| TRINITY_DN2185_c0_g1_i1  | dmso | control | 0,31636275 | 5,50957087 | 0,0175257  | 0,0716352  |
| TRINITY_DN1861_c0_g1_i1  | dmso | control | 0,31553063 | 6,12309898 | 0,01309734 | 0,05740019 |
| TRINITY_DN2597_c0_g1_i1  | dmso | control | 0,31428667 | 5,73756683 | 0,02390907 | 0,09057607 |
| TRINITY_DN241_c0_g1_i1   | dmso | control | 0,31334868 | 8,18553242 | 0,02310819 | 0,08821294 |
| TRINITY_DN12031_c0_g1_i1 | dmso | control | 0,31316009 | 6,04400277 | 0,01009343 | 0,04677563 |
| TRINITY_DN390_c0_g1_i1   | dmso | control | 0,31295192 | 9,67443694 | 0,00387275 | 0,02210439 |
| TRINITY_DN7997_c0_g1_i1  | dmso | control | 0,31254229 | 5,90544013 | 0,02010022 | 0,07954732 |
| TRINITY_DN5552_c0_g1_i1  | dmso | control | 0,31224524 | 7,7108818  | 0,02001235 | 0,07928643 |
| TRINITY_DN676_c0_g1_i1   | dmso | control | 0,31210652 | 5,33512416 | 0,02648877 | 0,09768454 |
| TRINITY_DN941_c0_g1_i1   | dmso | control | 0,31050882 | 8,0240331  | 0,00407887 | 0,02297944 |
| TRINITY_DN32449_c0_g1_i1 | dmso | control | 0,31034528 | 6,51847723 | 0,01202732 | 0,05368806 |
| TRINITY_DN1757_c0_g1_i1  | dmso | control | 0,30972536 | 5,95381036 | 0,01631185 | 0,0676888  |
| TRINITY_DN7332_c0_g1_i1  | dmso | control | 0,30890274 | 7,02157369 | 0,00666525 | 0,03374679 |
| TRINITY_DN1460_c0_g1_i1  | dmso | control | 0,30730358 | 6,09155531 | 0,01829315 | 0,07397662 |
| TRINITY_DN5711_c0_g1_i1  | dmso | control | 0,30723777 | 7,18478099 | 0,01057005 | 0,04854828 |
| TRINITY_DN7099_c0_g1_i1  | dmso | control | 0,30581536 | 5,80954657 | 0,01557726 | 0,06520098 |
| TRINITY_DN3129_c0_g1_i1  | dmso | control | 0,30432309 | 7,63706269 | 0,00569609 | 0,02993091 |
| TRINITY_DN4954_c0_g1_i1  | dmso | control | 0,30415065 | 8,0755035  | 0,00782325 | 0,03830739 |
| TRINITY_DN1202_c0_g1_i1  | dmso | control | 0,30405318 | 6,00538339 | 0,01432457 | 0,061099   |
| TRINITY_DN19240_c0_g1_i1 | dmso | control | 0,30344639 | 7,12657942 | 0,01974593 | 0,07851087 |
| TRINITY_DN12487_c0_g1_i1 | dmso | control | 0,30309623 | 5,98333898 | 0,02532516 | 0,09443001 |
| TRINITY_DN1215_c0_g1_i1  | dmso | control | 0,30280828 | 6,14437405 | 0,01240774 | 0,05516463 |
| TRINITY_DN11144_c0_g1_i1 | dmso | control | 0,3027193  | 6,31370308 | 0,01170705 | 0,05253442 |
| TRINITY_DN1045_c0_g1_i1  | dmso | control | 0,30136016 | 5,90345182 | 0,01521914 | 0,06407477 |
| TRINITY_DN5303_c0_g1_i1  | dmso | control | 0,30100172 | 6,07077606 | 0,01481762 | 0,06276849 |
| TRINITY_DN6001_c0_g1_i1  | dmso | control | 0,30068917 | 6,39787684 | 0,02040951 | 0,0803969  |
| TRINITY_DN11602_c0_g1_i1 | dmso | control | 0,29953567 | 5,62440813 | 0,02015621 | 0,07972521 |
| TRINITY_DN1589_c0_g1_i1  | dmso | control | 0,29937767 | 6,57156573 | 0,02630606 | 0,09713472 |
| TRINITY_DN5161_c0_g1_i1  | dmso | control | 0,29937378 | 6,10545079 | 0,01448354 | 0,06156534 |
| TRINITY_DN541_c0_g1_i1   | dmso | control | 0,29932739 | 8,1604526  | 0,01215082 | 0,05414507 |
| TRINITY_DN11204_c0_g1_i1 | dmso | control | 0,29758383 | 5,72130464 | 0,01964925 | 0,07816949 |



|                          |      |         |            |            |            |            |
|--------------------------|------|---------|------------|------------|------------|------------|
| TRINITY_DN2047_c0_g1_i1  | dmso | control | 0,29676889 | 6,49286922 | 0,01463832 | 0,0621     |
| TRINITY_DN4877_c0_g1_i1  | dmso | control | 0,29571556 | 7,69727492 | 0,00767506 | 0,0377505  |
| TRINITY_DN10961_c0_g1_i1 | dmso | control | 0,29536635 | 8,01489387 | 0,01015465 | 0,04701407 |
| TRINITY_DN837_c0_g1_i1   | dmso | control | 0,29501073 | 6,81579688 | 0,00965387 | 0,04521731 |
| TRINITY_DN484_c0_g1_i1   | dmso | control | 0,29409739 | 7,87552229 | 0,0120459  | 0,05375441 |
| TRINITY_DN5538_c0_g1_i1  | dmso | control | 0,29396771 | 6,66053423 | 0,01698383 | 0,06987507 |
| TRINITY_DN18728_c0_g1_i1 | dmso | control | 0,29287292 | 8,26474326 | 0,0063612  | 0,03256112 |
| TRINITY_DN580_c0_g1_i1   | dmso | control | 0,2928137  | 6,67861116 | 0,0193528  | 0,0772241  |
| TRINITY_DN6185_c0_g1_i1  | dmso | control | 0,29272136 | 6,00368836 | 0,01960345 | 0,07803027 |
| TRINITY_DN5267_c0_g1_i1  | dmso | control | 0,29264969 | 8,53377329 | 0,00625254 | 0,0321416  |
| TRINITY_DN666_c0_g1_i1   | dmso | control | 0,29070736 | 7,48558244 | 0,00848213 | 0,04085857 |
| TRINITY_DN7039_c0_g1_i1  | dmso | control | 0,29056717 | 6,13298681 | 0,01682964 | 0,06943847 |
| TRINITY_DN6063_c0_g1_i1  | dmso | control | 0,28992496 | 7,05844856 | 0,01768386 | 0,07213876 |
| TRINITY_DN1432_c0_g1_i1  | dmso | control | 0,28926306 | 5,81625522 | 0,02496769 | 0,09344707 |
| TRINITY_DN1853_c0_g1_i1  | dmso | control | 0,288626   | 9,13510751 | 0,00787879 | 0,03855321 |
| TRINITY_DN5251_c0_g1_i1  | dmso | control | 0,28848329 | 6,5065958  | 0,0165714  | 0,06849038 |
| TRINITY_DN24_c0_g1_i1    | dmso | control | 0,28807189 | 7,5716966  | 0,01476831 | 0,06261468 |
| TRINITY_DN923_c0_g1_i1   | dmso | control | 0,28805567 | 7,94432249 | 0,00802274 | 0,03909868 |
| TRINITY_DN1053_c0_g1_i1  | dmso | control | 0,28750605 | 7,71561192 | 0,00898453 | 0,04263518 |
| TRINITY_DN2985_c0_g1_i1  | dmso | control | 0,2861707  | 7,85626621 | 0,0133253  | 0,05815227 |
| TRINITY_DN11044_c0_g1_i1 | dmso | control | 0,28605347 | 7,25246511 | 0,01280999 | 0,05652031 |
| TRINITY_DN971_c0_g1_i1   | dmso | control | 0,28552504 | 5,85648094 | 0,02640187 | 0,09741379 |
| TRINITY_DN1139_c0_g1_i1  | dmso | control | 0,28542584 | 7,70928534 | 0,00993326 | 0,04621125 |
| TRINITY_DN6188_c0_g1_i1  | dmso | control | 0,285395   | 6,28314026 | 0,02516908 | 0,09396934 |
| TRINITY_DN609_c0_g1_i1   | dmso | control | 0,28494797 | 7,39844729 | 0,01222991 | 0,05445776 |
| TRINITY_DN6189_c0_g1_i1  | dmso | control | 0,28445006 | 5,89368723 | 0,0239911  | 0,09076778 |
| TRINITY_DN5435_c0_g1_i1  | dmso | control | 0,28275152 | 7,12367035 | 0,01690457 | 0,06956881 |
| TRINITY_DN2438_c0_g1_i1  | dmso | control | 0,28264741 | 9,21813729 | 0,00717268 | 0,03576435 |
| TRINITY_DN44_c0_g1_i1    | dmso | control | 0,28251219 | 5,86989883 | 0,02321433 | 0,08846498 |
| TRINITY_DN18622_c0_g1_i1 | dmso | control | 0,28217708 | 6,72086549 | 0,0241825  | 0,09115769 |
| TRINITY_DN861_c0_g1_i1   | dmso | control | 0,28212089 | 11,0109809 | 0,01009279 | 0,04677563 |

|                          |      |         |            |            |            |            |
|--------------------------|------|---------|------------|------------|------------|------------|
| TRINITY_DN11008_c0_g1_i1 | dmso | control | 0,28209935 | 7,31065078 | 0,01021308 | 0,04723919 |
| TRINITY_DN2228_c0_g1_i1  | dmso | control | 0,28116561 | 5,78863275 | 0,02661509 | 0,09810027 |
| TRINITY_DN6284_c0_g1_i1  | dmso | control | 0,27920855 | 6,16117376 | 0,01870289 | 0,07525439 |
| TRINITY_DN5739_c0_g1_i1  | dmso | control | 0,27617212 | 5,96206443 | 0,02598186 | 0,09633163 |
| TRINITY_DN306_c0_g1_i1   | dmso | control | 0,27449469 | 7,67373436 | 0,01758484 | 0,0718054  |
| TRINITY_DN3673_c0_g1_i1  | dmso | control | 0,27426641 | 8,19569796 | 0,01060312 | 0,04865377 |
| TRINITY_DN1848_c0_g1_i1  | dmso | control | 0,27399071 | 6,48667416 | 0,02612938 | 0,09665528 |
| TRINITY_DN965_c0_g1_i1   | dmso | control | 0,27329866 | 7,49630779 | 0,02403333 | 0,09090375 |
| TRINITY_DN921_c0_g1_i1   | dmso | control | 0,27071283 | 8,51784919 | 0,01146546 | 0,05172348 |
| TRINITY_DN75_c0_g1_i1    | dmso | control | 0,27038793 | 7,92466188 | 0,01323652 | 0,05783472 |
| TRINITY_DN279_c0_g1_i1   | dmso | control | 0,2677333  | 8,34557362 | 0,01431855 | 0,061099   |
| TRINITY_DN369_c0_g1_i1   | dmso | control | 0,26728864 | 8,97911221 | 0,01140597 | 0,05154078 |
| TRINITY_DN1372_c0_g1_i1  | dmso | control | 0,26696697 | 6,91001372 | 0,01752484 | 0,0716352  |
| TRINITY_DN7063_c0_g1_i1  | dmso | control | 0,26666431 | 6,66524339 | 0,0235188  | 0,08937885 |
| TRINITY_DN365_c0_g1_i1   | dmso | control | 0,26626432 | 7,99905339 | 0,01628998 | 0,06763435 |
| TRINITY_DN2620_c0_g1_i1  | dmso | control | 0,26535762 | 7,14739205 | 0,01733333 | 0,07096939 |
| TRINITY_DN19562_c0_g1_i1 | dmso | control | 0,26417783 | 8,98192719 | 0,01538223 | 0,06464835 |
| TRINITY_DN4985_c0_g1_i1  | dmso | control | 0,26074806 | 6,96074658 | 0,01970416 | 0,07836635 |
| TRINITY_DN77_c0_g1_i1    | dmso | control | 0,25886253 | 9,4157282  | 0,02439101 | 0,09172825 |
| TRINITY_DN10688_c0_g1_i1 | dmso | control | 0,25813369 | 10,4219231 | 0,0127324  | 0,0563134  |
| TRINITY_DN12912_c0_g1_i1 | dmso | control | 0,25796704 | 7,14579443 | 0,02628835 | 0,09709414 |
| TRINITY_DN1031_c0_g1_i1  | dmso | control | 0,2571773  | 9,80954621 | 0,01852422 | 0,07470194 |
| TRINITY_DN5125_c0_g1_i1  | dmso | control | 0,25458527 | 8,06095344 | 0,01818698 | 0,07369172 |
| TRINITY_DN5713_c0_g1_i1  | dmso | control | 0,25451611 | 7,61476848 | 0,0199894  | 0,07921724 |
| TRINITY_DN4987_c0_g1_i1  | dmso | control | 0,25257169 | 8,84323495 | 0,01908479 | 0,07640794 |
| TRINITY_DN10749_c0_g1_i1 | dmso | control | 0,24847981 | 7,77207779 | 0,02599974 | 0,09633377 |
| TRINITY_DN142_c0_g1_i1   | dmso | control | 0,24308572 | 9,8683303  | 0,02209903 | 0,08519362 |
| TRINITY_DN2116_c0_g1_i1  | dmso | control | 0,24221709 | 8,57732943 | 0,02439813 | 0,09173112 |
| TRINITY_DN814_c0_g1_i1   | dmso | control | 0,24178869 | 8,43809543 | 0,02381587 | 0,09031772 |
| TRINITY_DN934_c0_g1_i1   | dmso | control | 0,23806331 | 10,8164713 | 0,02389258 | 0,09053735 |
| TRINITY_DN18733_c0_g1_i1 | dmso | control | -0,2440764 | 10,0508966 | 0,01928271 | 0,07698695 |

|                          |      |         |            |            |            |            |
|--------------------------|------|---------|------------|------------|------------|------------|
| TRINITY_DN857_c0_g1_i1   | dmso | control | -0,2452159 | 8,44374781 | 0,0244811  | 0,09194733 |
| TRINITY_DN12851_c0_g1_i1 | dmso | control | -0,2482612 | 7,67736712 | 0,02232458 | 0,08594843 |
| TRINITY_DN10497_c0_g1_i1 | dmso | control | -0,249637  | 7,23707394 | 0,02321545 | 0,08846498 |
| TRINITY_DN18616_c0_g1_i1 | dmso | control | -0,2497252 | 7,72829893 | 0,02316775 | 0,08837174 |
| TRINITY_DN10693_c0_g1_i1 | dmso | control | -0,2515492 | 8,48247758 | 0,01809533 | 0,07338209 |
| TRINITY_DN5743_c0_g1_i1  | dmso | control | -0,2515577 | 9,87156222 | 0,0164725  | 0,06814009 |
| TRINITY_DN4840_c0_g1_i1  | dmso | control | -0,2527918 | 7,92676547 | 0,02636836 | 0,09731502 |
| TRINITY_DN18769_c0_g1_i1 | dmso | control | -0,2535754 | 8,48294056 | 0,02628556 | 0,09709414 |
| TRINITY_DN1466_c0_g1_i1  | dmso | control | -0,2556951 | 8,45021196 | 0,01714342 | 0,07037131 |
| TRINITY_DN274_c0_g1_i1   | dmso | control | -0,255792  | 8,22045373 | 0,01727148 | 0,07077631 |
| TRINITY_DN13534_c0_g1_i1 | dmso | control | -0,2562141 | 8,64475983 | 0,02105378 | 0,08232873 |
| TRINITY_DN4996_c0_g1_i1  | dmso | control | -0,259277  | 9,87075007 | 0,01549176 | 0,0649386  |
| TRINITY_DN5755_c0_g1_i1  | dmso | control | -0,2600302 | 6,73881241 | 0,02313996 | 0,0883109  |
| TRINITY_DN4770_c0_g1_i1  | dmso | control | -0,2610746 | 6,51500432 | 0,02425661 | 0,09135372 |
| TRINITY_DN11307_c0_g1_i1 | dmso | control | -0,2613639 | 7,85133741 | 0,02713178 | 0,0995981  |
| TRINITY_DN11188_c0_g1_i1 | dmso | control | -0,261724  | 8,30892228 | 0,02154623 | 0,08371039 |
| TRINITY_DN19135_c0_g1_i1 | dmso | control | -0,2625725 | 7,02988929 | 0,02685031 | 0,09869027 |
| TRINITY_DN412_c0_g1_i1   | dmso | control | -0,2627249 | 6,57312995 | 0,02395725 | 0,09068722 |
| TRINITY_DN10819_c0_g1_i1 | dmso | control | -0,2629512 | 7,0290461  | 0,02208071 | 0,08514571 |
| TRINITY_DN34151_c0_g1_i1 | dmso | control | -0,2630556 | 9,68696219 | 0,0220499  | 0,08507234 |
| TRINITY_DN32309_c0_g1_i1 | dmso | control | -0,2635182 | 12,3337137 | 0,01917927 | 0,0766321  |
| TRINITY_DN1868_c0_g1_i1  | dmso | control | -0,2647501 | 8,68613697 | 0,01686838 | 0,06950809 |
| TRINITY_DN5280_c0_g1_i1  | dmso | control | -0,2662445 | 6,4807732  | 0,0215263  | 0,08368758 |
| TRINITY_DN5673_c0_g1_i1  | dmso | control | -0,2680302 | 7,48799987 | 0,02198913 | 0,0849059  |
| TRINITY_DN18731_c0_g1_i1 | dmso | control | -0,2698168 | 8,26193735 | 0,01342813 | 0,05851002 |
| TRINITY_DN18_c0_g1_i1    | dmso | control | -0,270655  | 8,4319754  | 0,01328465 | 0,05802745 |
| TRINITY_DN743_c0_g1_i1   | dmso | control | -0,2721281 | 8,3161998  | 0,02261926 | 0,08682839 |
| TRINITY_DN20631_c0_g1_i1 | dmso | control | -0,2725878 | 8,18874565 | 0,01407787 | 0,0603785  |
| TRINITY_DN19091_c0_g1_i1 | dmso | control | -0,2728898 | 6,26051231 | 0,02279022 | 0,08725278 |
| TRINITY_DN6182_c0_g1_i1  | dmso | control | -0,2728911 | 6,52862993 | 0,02557761 | 0,09512579 |
| TRINITY_DN330_c0_g1_i1   | dmso | control | -0,2736397 | 6,55132256 | 0,0182769  | 0,07393163 |

|                          |      |         |            |            |            |            |
|--------------------------|------|---------|------------|------------|------------|------------|
| TRINITY_DN5634_c0_g1_i1  | dmso | control | -0,2740943 | 6,98147911 | 0,01604452 | 0,06684831 |
| TRINITY_DN11441_c0_g1_i1 | dmso | control | -0,2745707 | 9,50246124 | 0,02285126 | 0,08741697 |
| TRINITY_DN174_c0_g1_i1   | dmso | control | -0,2752255 | 10,0463488 | 0,02376388 | 0,09016791 |
| TRINITY_DN467_c0_g1_i1   | dmso | control | -0,2761622 | 8,64027051 | 0,02166343 | 0,08407531 |
| TRINITY_DN11094_c0_g1_i1 | dmso | control | -0,2772285 | 6,98613891 | 0,02409258 | 0,09100101 |
| TRINITY_DN18948_c0_g1_i1 | dmso | control | -0,2787889 | 7,46860431 | 0,02129717 | 0,08298828 |
| TRINITY_DN32509_c0_g1_i1 | dmso | control | -0,2794529 | 9,9143461  | 0,01004599 | 0,04659897 |
| TRINITY_DN10954_c0_g1_i1 | dmso | control | -0,2795544 | 7,16902094 | 0,01308438 | 0,05736083 |
| TRINITY_DN334_c0_g1_i1   | dmso | control | -0,2813461 | 9,7029019  | 0,01030758 | 0,04756965 |
| TRINITY_DN10914_c0_g1_i1 | dmso | control | -0,281348  | 5,92208096 | 0,02398136 | 0,09075471 |
| TRINITY_DN1253_c0_g1_i1  | dmso | control | -0,2817424 | 6,92051398 | 0,01288993 | 0,05680141 |
| TRINITY_DN10831_c0_g1_i1 | dmso | control | -0,2819154 | 6,76595344 | 0,01289924 | 0,05682509 |
| TRINITY_DN11907_c0_g1_i1 | dmso | control | -0,2820751 | 6,6685154  | 0,01917981 | 0,0766321  |
| TRINITY_DN19548_c0_g1_i1 | dmso | control | -0,2839919 | 7,81345932 | 0,02181147 | 0,0845136  |
| TRINITY_DN12952_c0_g1_i1 | dmso | control | -0,2840908 | 6,60577922 | 0,01598417 | 0,06669306 |
| TRINITY_DN997_c0_g1_i1   | dmso | control | -0,2852453 | 7,41296049 | 0,01894522 | 0,07599657 |
| TRINITY_DN18896_c0_g1_i1 | dmso | control | -0,2858379 | 6,41398601 | 0,01624331 | 0,06752076 |
| TRINITY_DN2039_c0_g1_i1  | dmso | control | -0,2858584 | 6,42858826 | 0,02025198 | 0,07997263 |
| TRINITY_DN5533_c0_g1_i1  | dmso | control | -0,2866046 | 6,48826444 | 0,01384065 | 0,05964445 |
| TRINITY_DN11416_c0_g1_i1 | dmso | control | -0,2870462 | 7,35463041 | 0,01313598 | 0,05751718 |
| TRINITY_DN11702_c0_g1_i1 | dmso | control | -0,2870989 | 6,96931925 | 0,01292462 | 0,05690221 |
| TRINITY_DN5040_c0_g1_i1  | dmso | control | -0,2872383 | 7,41257497 | 0,00861324 | 0,04132124 |
| TRINITY_DN10698_c0_g1_i1 | dmso | control | -0,2884027 | 7,04442437 | 0,01406283 | 0,06033191 |
| TRINITY_DN151_c0_g1_i1   | dmso | control | -0,2885248 | 6,83161669 | 0,01438971 | 0,06129318 |
| TRINITY_DN466_c0_g1_i1   | dmso | control | -0,2890171 | 6,90984058 | 0,013031   | 0,05716148 |
| TRINITY_DN6253_c0_g1_i1  | dmso | control | -0,2892653 | 9,36599956 | 0,00946439 | 0,04451746 |
| TRINITY_DN5497_c0_g1_i1  | dmso | control | -0,2905031 | 6,21189114 | 0,01783865 | 0,0725653  |
| TRINITY_DN1119_c0_g1_i1  | dmso | control | -0,2907067 | 7,48657917 | 0,00968917 | 0,04533852 |
| TRINITY_DN322_c0_g1_i1   | dmso | control | -0,2914753 | 9,53152887 | 0,00817669 | 0,03972831 |
| TRINITY_DN11798_c0_g1_i1 | dmso | control | -0,2919088 | 5,84798037 | 0,01954303 | 0,07783266 |
| TRINITY_DN10763_c0_g1_i1 | dmso | control | -0,2919827 | 7,16099632 | 0,01930961 | 0,07707302 |

|                          |      |         |            |            |            |            |
|--------------------------|------|---------|------------|------------|------------|------------|
| TRINITY_DN1188_c0_g1_i1  | dmso | control | -0,2920277 | 6,74581203 | 0,02090683 | 0,08186477 |
| TRINITY_DN4667_c0_g1_i1  | dmso | control | -0,2938182 | 6,97547747 | 0,02329788 | 0,08869509 |
| TRINITY_DN10701_c0_g1_i1 | dmso | control | -0,2939526 | 7,57051133 | 0,0233675  | 0,08889744 |
| TRINITY_DN5077_c0_g1_i1  | dmso | control | -0,2944679 | 7,83120604 | 0,01039532 | 0,04789806 |
| TRINITY_DN124_c0_g1_i1   | dmso | control | -0,2954684 | 7,56665774 | 0,01103562 | 0,05022356 |
| TRINITY_DN1973_c0_g1_i1  | dmso | control | -0,2954852 | 7,19448912 | 0,00932598 | 0,0439437  |
| TRINITY_DN5466_c0_g1_i1  | dmso | control | -0,2958591 | 8,87230382 | 0,01532732 | 0,0644363  |
| TRINITY_DN13612_c0_g1_i1 | dmso | control | -0,2964299 | 6,80371857 | 0,0177285  | 0,07223928 |
| TRINITY_DN2491_c0_g1_i1  | dmso | control | -0,2966006 | 6,52291949 | 0,01002938 | 0,04658343 |
| TRINITY_DN19939_c0_g1_i1 | dmso | control | -0,2967185 | 7,23799588 | 0,01748957 | 0,071528   |
| TRINITY_DN18682_c0_g1_i1 | dmso | control | -0,2971445 | 5,56689821 | 0,02584458 | 0,09587184 |
| TRINITY_DN2978_c0_g1_i1  | dmso | control | -0,2973221 | 6,13924751 | 0,02263475 | 0,08684765 |
| TRINITY_DN6133_c0_g1_i1  | dmso | control | -0,2974656 | 8,06428878 | 0,01025929 | 0,04739987 |
| TRINITY_DN12234_c0_g1_i1 | dmso | control | -0,2978747 | 6,4134587  | 0,01131257 | 0,05122572 |
| TRINITY_DN9262_c0_g1_i1  | dmso | control | -0,2988455 | 6,69860273 | 0,01168726 | 0,05247825 |
| TRINITY_DN9_c0_g1_i1     | dmso | control | -0,2991191 | 11,1871802 | 0,00435096 | 0,02420085 |
| TRINITY_DN5045_c0_g1_i1  | dmso | control | -0,2997552 | 9,21148277 | 0,00707167 | 0,03538282 |
| TRINITY_DN561_c0_g1_i1   | dmso | control | -0,2999893 | 10,3387362 | 0,00640472 | 0,03273751 |
| TRINITY_DN10884_c0_g1_i1 | dmso | control | -0,3013998 | 6,16416326 | 0,01225201 | 0,0545394  |
| TRINITY_DN3177_c0_g1_i1  | dmso | control | -0,301543  | 7,66053826 | 0,01873075 | 0,07532453 |
| TRINITY_DN32524_c0_g1_i1 | dmso | control | -0,3017391 | 9,96545891 | 0,01029678 | 0,04753499 |
| TRINITY_DN9171_c0_g1_i1  | dmso | control | -0,3021216 | 6,76641021 | 0,01621903 | 0,06745718 |
| TRINITY_DN5557_c0_g1_i1  | dmso | control | -0,3025114 | 8,30102247 | 0,00907372 | 0,04297374 |
| TRINITY_DN468_c0_g1_i1   | dmso | control | -0,3025688 | 6,74824259 | 0,02446028 | 0,09189302 |
| TRINITY_DN19644_c0_g1_i1 | dmso | control | -0,3027294 | 6,39407036 | 0,01135616 | 0,05135873 |
| TRINITY_DN21735_c0_g1_i1 | dmso | control | -0,3031312 | 6,92082677 | 0,01154369 | 0,05196279 |
| TRINITY_DN1364_c0_g1_i1  | dmso | control | -0,3034888 | 5,52636981 | 0,02275363 | 0,08718201 |
| TRINITY_DN6401_c0_g1_i1  | dmso | control | -0,3035994 | 6,46528433 | 0,01366082 | 0,05913412 |
| TRINITY_DN3741_c0_g1_i1  | dmso | control | -0,3042657 | 5,49900175 | 0,02259764 | 0,08681377 |
| TRINITY_DN18657_c0_g1_i1 | dmso | control | -0,3044098 | 6,57907794 | 0,01252774 | 0,05559547 |
| TRINITY_DN12252_c0_g1_i1 | dmso | control | -0,3050457 | 6,30268134 | 0,02180028 | 0,08449291 |

|                          |      |         |            |            |            |            |
|--------------------------|------|---------|------------|------------|------------|------------|
| TRINITY_DN12059_c0_g1_i1 | dmso | control | -0,3051717 | 6,72125595 | 0,01165809 | 0,05237981 |
| TRINITY_DN1005_c0_g1_i1  | dmso | control | -0,3056174 | 6,64107652 | 0,00820768 | 0,03981988 |
| TRINITY_DN42_c0_g1_i1    | dmso | control | -0,3056939 | 8,77673038 | 0,00543344 | 0,02883398 |
| TRINITY_DN18776_c0_g1_i1 | dmso | control | -0,3064371 | 5,89420942 | 0,01686312 | 0,06950809 |
| TRINITY_DN20071_c0_g1_i1 | dmso | control | -0,3079206 | 7,37844098 | 0,00499498 | 0,02691252 |
| TRINITY_DN3168_c0_g1_i1  | dmso | control | -0,3079484 | 7,95593649 | 0,00874356 | 0,04179377 |
| TRINITY_DN18807_c0_g1_i1 | dmso | control | -0,3081854 | 8,17310458 | 0,01140712 | 0,05154078 |
| TRINITY_DN18689_c0_g1_i1 | dmso | control | -0,3088139 | 11,5138528 | 0,00377177 | 0,0216633  |
| TRINITY_DN11626_c0_g1_i1 | dmso | control | -0,3094463 | 7,17519289 | 0,00530059 | 0,0282431  |
| TRINITY_DN5632_c0_g1_i1  | dmso | control | -0,3094518 | 5,81214578 | 0,02072841 | 0,08129836 |
| TRINITY_DN4975_c0_g1_i1  | dmso | control | -0,3095027 | 6,49860195 | 0,00872513 | 0,04173327 |
| TRINITY_DN19034_c0_g1_i1 | dmso | control | -0,309539  | 6,11649889 | 0,01782002 | 0,07253034 |
| TRINITY_DN5425_c0_g1_i1  | dmso | control | -0,3097465 | 5,63917466 | 0,0166382  | 0,06872714 |
| TRINITY_DN32712_c0_g1_i1 | dmso | control | -0,3098654 | 7,08337612 | 0,00625902 | 0,0321635  |
| TRINITY_DN11317_c0_g1_i1 | dmso | control | -0,3112943 | 6,55912088 | 0,00921989 | 0,04352332 |
| TRINITY_DN5212_c0_g1_i1  | dmso | control | -0,3115997 | 6,68053073 | 0,01993655 | 0,07902951 |
| TRINITY_DN19608_c0_g1_i1 | dmso | control | -0,3118336 | 6,6079754  | 0,01114033 | 0,05058853 |
| TRINITY_DN2068_c0_g1_i1  | dmso | control | -0,3119832 | 6,04253555 | 0,01346924 | 0,0586213  |
| TRINITY_DN729_c0_g1_i1   | dmso | control | -0,312503  | 6,29387023 | 0,0131563  | 0,05758873 |
| TRINITY_DN4907_c0_g1_i1  | dmso | control | -0,3125281 | 6,1287278  | 0,02565757 | 0,0953005  |
| TRINITY_DN1281_c0_g1_i1  | dmso | control | -0,3126519 | 5,98721874 | 0,0154488  | 0,06479616 |
| TRINITY_DN61314_c0_g1_i1 | dmso | control | -0,313114  | 6,26112585 | 0,01517252 | 0,06393436 |
| TRINITY_DN11727_c0_g1_i1 | dmso | control | -0,313685  | 5,49511217 | 0,01771216 | 0,07219305 |
| TRINITY_DN6767_c0_g1_i1  | dmso | control | -0,3137139 | 6,89063255 | 0,01059288 | 0,04862221 |
| TRINITY_DN116_c0_g1_i1   | dmso | control | -0,3150806 | 8,3422909  | 0,00620457 | 0,03197469 |
| TRINITY_DN12243_c0_g1_i1 | dmso | control | -0,3165019 | 5,69273705 | 0,0134693  | 0,0586213  |
| TRINITY_DN32338_c0_g1_i1 | dmso | control | -0,3168638 | 5,51733871 | 0,02218467 | 0,08547816 |
| TRINITY_DN11331_c0_g1_i1 | dmso | control | -0,3184794 | 8,20129822 | 0,00367133 | 0,02122991 |
| TRINITY_DN11695_c0_g1_i1 | dmso | control | -0,3185772 | 5,91268232 | 0,02271035 | 0,08703928 |
| TRINITY_DN1303_c0_g1_i1  | dmso | control | -0,3187357 | 5,46931146 | 0,02406442 | 0,09094024 |
| TRINITY_DN446_c0_g1_i1   | dmso | control | -0,3188874 | 6,07969692 | 0,0136896  | 0,05920548 |

|                          |      |         |            |            |            |            |
|--------------------------|------|---------|------------|------------|------------|------------|
| TRINITY_DN19085_c0_g1_i1 | dmso | control | -0,3190118 | 8,04338507 | 0,01096194 | 0,04998269 |
| TRINITY_DN19265_c0_g1_i1 | dmso | control | -0,3191489 | 6,35942952 | 0,01396775 | 0,06000607 |
| TRINITY_DN11785_c0_g1_i1 | dmso | control | -0,3200105 | 6,44871452 | 0,00582799 | 0,03043578 |
| TRINITY_DN10759_c0_g1_i1 | dmso | control | -0,3206041 | 8,21671594 | 0,00278522 | 0,01704045 |
| TRINITY_DN6899_c0_g1_i1  | dmso | control | -0,3211435 | 5,70339019 | 0,01984118 | 0,07878116 |
| TRINITY_DN5244_c0_g1_i1  | dmso | control | -0,3215044 | 5,63030387 | 0,01322498 | 0,05780177 |
| TRINITY_DN2133_c0_g1_i1  | dmso | control | -0,3217296 | 6,81391235 | 0,0099208  | 0,04618306 |
| TRINITY_DN20125_c0_g1_i1 | dmso | control | -0,3219696 | 6,21232986 | 0,00645577 | 0,03294019 |
| TRINITY_DN18618_c0_g1_i1 | dmso | control | -0,3221296 | 6,53488672 | 0,00991436 | 0,04617222 |
| TRINITY_DN10906_c0_g1_i1 | dmso | control | -0,3228464 | 5,48262888 | 0,02330203 | 0,08869509 |
| TRINITY_DN12512_c0_g1_i1 | dmso | control | -0,3239407 | 5,60322341 | 0,01282123 | 0,05653315 |
| TRINITY_DN12830_c0_g1_i1 | dmso | control | -0,3240022 | 5,18055107 | 0,02127124 | 0,08292571 |
| TRINITY_DN470_c0_g1_i1   | dmso | control | -0,3244063 | 8,0859966  | 0,00342564 | 0,02011519 |
| TRINITY_DN18744_c0_g1_i1 | dmso | control | -0,3249485 | 6,65480008 | 0,00516233 | 0,02763896 |
| TRINITY_DN12901_c0_g1_i1 | dmso | control | -0,3250811 | 6,47276833 | 0,0066515  | 0,03368897 |
| TRINITY_DN11018_c0_g1_i1 | dmso | control | -0,3251398 | 9,32240723 | 0,00683623 | 0,03439545 |
| TRINITY_DN5508_c0_g1_i1  | dmso | control | -0,3255204 | 7,23145078 | 0,0036494  | 0,0211539  |
| TRINITY_DN5676_c0_g1_i1  | dmso | control | -0,325744  | 5,43459703 | 0,0214788  | 0,08358092 |
| TRINITY_DN5059_c0_g1_i1  | dmso | control | -0,3270239 | 6,85377476 | 0,00400664 | 0,02272315 |
| TRINITY_DN696_c0_g1_i1   | dmso | control | -0,3272667 | 10,5581823 | 0,00248619 | 0,01556698 |
| TRINITY_DN18821_c0_g1_i1 | dmso | control | -0,32747   | 6,53319413 | 0,00462031 | 0,02541521 |
| TRINITY_DN10692_c0_g1_i1 | dmso | control | -0,3275389 | 8,39415891 | 0,00254446 | 0,01584652 |
| TRINITY_DN1716_c0_g1_i1  | dmso | control | -0,3277334 | 7,43112652 | 0,00463691 | 0,02549226 |
| TRINITY_DN2475_c0_g1_i1  | dmso | control | -0,3283583 | 5,47678187 | 0,01361145 | 0,05899869 |
| TRINITY_DN18764_c0_g1_i1 | dmso | control | -0,3286435 | 7,96965134 | 0,00398281 | 0,02260579 |
| TRINITY_DN74_c0_g1_i1    | dmso | control | -0,3287168 | 6,16905002 | 0,01269362 | 0,05617627 |
| TRINITY_DN616_c0_g1_i1   | dmso | control | -0,3288003 | 6,15044145 | 0,00592515 | 0,03079844 |
| TRINITY_DN19839_c0_g1_i1 | dmso | control | -0,3293518 | 5,34823534 | 0,02003519 | 0,07935517 |
| TRINITY_DN32666_c0_g1_i1 | dmso | control | -0,3302566 | 5,86392893 | 0,02394684 | 0,09067161 |
| TRINITY_DN5902_c0_g1_i1  | dmso | control | -0,3304288 | 6,37445892 | 0,00772875 | 0,0379218  |
| TRINITY_DN18670_c0_g1_i1 | dmso | control | -0,3304644 | 7,00091901 | 0,01370421 | 0,0592509  |

|                          |      |         |            |            |            |            |
|--------------------------|------|---------|------------|------------|------------|------------|
| TRINITY_DN35128_c0_g1_i1 | dmso | control | -0,3308595 | 7,10489727 | 0,00684107 | 0,03440783 |
| TRINITY_DN19989_c0_g1_i1 | dmso | control | -0,3322392 | 5,04613597 | 0,02461065 | 0,09236186 |
| TRINITY_DN4642_c0_g1_i1  | dmso | control | -0,3324171 | 7,57802456 | 0,00379398 | 0,02175625 |
| TRINITY_DN5569_c0_g1_i1  | dmso | control | -0,3329874 | 5,46150618 | 0,01374712 | 0,05936536 |
| TRINITY_DN287_c0_g1_i1   | dmso | control | -0,3335054 | 9,60939176 | 0,00147044 | 0,01021671 |
| TRINITY_DN32312_c0_g1_i1 | dmso | control | -0,3342958 | 8,51776976 | 0,00883583 | 0,0421372  |
| TRINITY_DN1667_c0_g1_i1  | dmso | control | -0,3361619 | 5,64134328 | 0,00858611 | 0,04121847 |
| TRINITY_DN18675_c0_g1_i1 | dmso | control | -0,3362525 | 5,50594446 | 0,02325752 | 0,08857235 |
| TRINITY_DN11689_c0_g1_i1 | dmso | control | -0,3367445 | 5,34172908 | 0,02112303 | 0,08253236 |
| TRINITY_DN18753_c0_g1_i1 | dmso | control | -0,337457  | 10,8191746 | 0,00271438 | 0,0166635  |
| TRINITY_DN8736_c0_g1_i1  | dmso | control | -0,3385828 | 6,26876798 | 0,00439073 | 0,02440326 |
| TRINITY_DN145_c0_g1_i1   | dmso | control | -0,3386991 | 6,89971919 | 0,0026789  | 0,01650885 |
| TRINITY_DN5348_c0_g1_i1  | dmso | control | -0,338767  | 6,76378524 | 0,01862633 | 0,07501273 |
| TRINITY_DN18813_c0_g1_i1 | dmso | control | -0,3398256 | 7,48385372 | 0,00351409 | 0,02055934 |
| TRINITY_DN18686_c0_g1_i1 | dmso | control | -0,3399514 | 5,91204025 | 0,00624112 | 0,03210577 |
| TRINITY_DN19375_c0_g1_i1 | dmso | control | -0,3400086 | 6,17186675 | 0,01158941 | 0,05215236 |
| TRINITY_DN7472_c0_g1_i1  | dmso | control | -0,3404805 | 5,3926856  | 0,0158759  | 0,06629875 |
| TRINITY_DN1581_c0_g1_i1  | dmso | control | -0,340876  | 5,83456051 | 0,00805551 | 0,03922561 |
| TRINITY_DN19203_c0_g1_i1 | dmso | control | -0,3415729 | 5,6587547  | 0,00801807 | 0,03908913 |
| TRINITY_DN37632_c0_g1_i1 | dmso | control | -0,341646  | 6,61268633 | 0,00556482 | 0,02933717 |
| TRINITY_DN7731_c0_g1_i1  | dmso | control | -0,3419133 | 4,83269791 | 0,02561536 | 0,09521716 |
| TRINITY_DN949_c0_g1_i1   | dmso | control | -0,3421488 | 5,86359859 | 0,00630561 | 0,03231092 |
| TRINITY_DN18697_c0_g1_i1 | dmso | control | -0,3424998 | 5,81331027 | 0,00755746 | 0,03729675 |
| TRINITY_DN14621_c0_g1_i1 | dmso | control | -0,3425882 | 6,24763622 | 0,00384708 | 0,02199964 |
| TRINITY_DN976_c0_g1_i1   | dmso | control | -0,3426317 | 5,53798324 | 0,00892793 | 0,04246427 |
| TRINITY_DN11361_c0_g1_i1 | dmso | control | -0,3426469 | 6,20174367 | 0,00403508 | 0,02283066 |
| TRINITY_DN11143_c0_g1_i1 | dmso | control | -0,3428297 | 6,15705895 | 0,01390004 | 0,05975775 |
| TRINITY_DN19195_c0_g1_i1 | dmso | control | -0,3433052 | 6,25646314 | 0,00385024 | 0,02200896 |
| TRINITY_DN6511_c0_g1_i1  | dmso | control | -0,3433363 | 4,8846061  | 0,02675374 | 0,09846058 |
| TRINITY_DN6313_c0_g1_i1  | dmso | control | -0,3434415 | 5,64846307 | 0,00855726 | 0,04109913 |
| TRINITY_DN647_c0_g1_i1   | dmso | control | -0,3435102 | 10,7599873 | 0,00168574 | 0,01141077 |



|                          |      |         |            |            |            |            |
|--------------------------|------|---------|------------|------------|------------|------------|
| TRINITY_DN12332_c0_g1_i1 | dmso | control | -0,3447844 | 6,29413936 | 0,0051852  | 0,02772027 |
| TRINITY_DN5698_c0_g1_i1  | dmso | control | -0,3448968 | 5,79828376 | 0,00781015 | 0,03825621 |
| TRINITY_DN8616_c0_g1_i1  | dmso | control | -0,3452231 | 6,37543295 | 0,0069057  | 0,03466497 |
| TRINITY_DN268_c0_g1_i1   | dmso | control | -0,3456777 | 5,8698596  | 0,00850269 | 0,04092682 |
| TRINITY_DN4700_c0_g1_i1  | dmso | control | -0,3460988 | 10,2613805 | 0,0083836  | 0,04050206 |
| TRINITY_DN6911_c0_g1_i1  | dmso | control | -0,3474846 | 7,45619284 | 0,00215063 | 0,01387486 |
| TRINITY_DN20670_c0_g1_i1 | dmso | control | -0,3476405 | 5,73200068 | 0,00774701 | 0,03799848 |
| TRINITY_DN1508_c0_g1_i1  | dmso | control | -0,347905  | 7,32705322 | 0,00181512 | 0,01211058 |
| TRINITY_DN4956_c0_g1_i1  | dmso | control | -0,3483361 | 4,58792939 | 0,02467559 | 0,09255748 |
| TRINITY_DN10733_c0_g1_i1 | dmso | control | -0,3489052 | 7,13906714 | 0,00175618 | 0,01180457 |
| TRINITY_DN2094_c0_g1_i1  | dmso | control | -0,3489211 | 4,66442094 | 0,02543104 | 0,09470259 |
| TRINITY_DN6267_c0_g1_i1  | dmso | control | -0,3489988 | 6,25773661 | 0,00477315 | 0,02603514 |
| TRINITY_DN1240_c0_g1_i1  | dmso | control | -0,3499108 | 6,80454592 | 0,00726897 | 0,03619451 |
| TRINITY_DN1353_c0_g1_i1  | dmso | control | -0,3504045 | 5,62352229 | 0,01174459 | 0,05267016 |
| TRINITY_DN10775_c0_g1_i1 | dmso | control | -0,3504131 | 8,64091954 | 0,00189551 | 0,0125484  |
| TRINITY_DN5243_c0_g1_i1  | dmso | control | -0,3512806 | 6,00592374 | 0,00423905 | 0,0237062  |
| TRINITY_DN4769_c0_g1_i1  | dmso | control | -0,3513456 | 6,42188908 | 0,00382854 | 0,02191098 |
| TRINITY_DN4605_c0_g1_i1  | dmso | control | -0,3513997 | 5,66097731 | 0,00791835 | 0,0387219  |
| TRINITY_DN33035_c0_g1_i1 | dmso | control | -0,3517492 | 4,58903839 | 0,02321708 | 0,08846498 |
| TRINITY_DN6530_c0_g1_i1  | dmso | control | -0,3518741 | 6,24918487 | 0,0028098  | 0,017169   |
| TRINITY_DN4881_c0_g1_i1  | dmso | control | -0,3522085 | 6,83730775 | 0,00214022 | 0,01382622 |
| TRINITY_DN18806_c0_g1_i1 | dmso | control | -0,352297  | 5,739618   | 0,00613341 | 0,03165312 |
| TRINITY_DN793_c0_g1_i1   | dmso | control | -0,3532739 | 7,25886774 | 0,00183    | 0,01219298 |
| TRINITY_DN11636_c0_g1_i1 | dmso | control | -0,3533543 | 5,20701199 | 0,01363788 | 0,05907022 |
| TRINITY_DN4728_c0_g1_i1  | dmso | control | -0,353632  | 6,38682368 | 0,00416948 | 0,02338958 |
| TRINITY_DN5209_c0_g1_i1  | dmso | control | -0,3551804 | 5,51464213 | 0,0089933  | 0,04266278 |
| TRINITY_DN2072_c0_g1_i1  | dmso | control | -0,3565806 | 7,78023431 | 0,00407371 | 0,02295932 |
| TRINITY_DN32794_c0_g1_i1 | dmso | control | -0,3568827 | 5,02110661 | 0,01298667 | 0,05703633 |
| TRINITY_DN819_c0_g1_i1   | dmso | control | -0,356917  | 6,19084236 | 0,00362565 | 0,02105003 |
| TRINITY_DN4707_c0_g1_i1  | dmso | control | -0,3569554 | 7,75683227 | 0,00155355 | 0,01068485 |
| TRINITY_DN10785_c0_g1_i1 | dmso | control | -0,357448  | 9,60448686 | 0,00119513 | 0,00860174 |

|                          |      |         |            |            |            |            |
|--------------------------|------|---------|------------|------------|------------|------------|
| TRINITY_DN5913_c0_g1_i1  | dmso | control | -0,3591628 | 6,29206992 | 0,00302613 | 0,01824394 |
| TRINITY_DN12380_c0_g1_i1 | dmso | control | -0,359616  | 5,93251664 | 0,01161362 | 0,05220506 |
| TRINITY_DN2259_c0_g1_i1  | dmso | control | -0,3596758 | 6,08522503 | 0,00405085 | 0,02287799 |
| TRINITY_DN10840_c0_g1_i1 | dmso | control | -0,3601717 | 9,22607552 | 0,0008335  | 0,00637633 |
| TRINITY_DN4888_c0_g1_i1  | dmso | control | -0,3601825 | 9,14933719 | 0,00096585 | 0,00716571 |
| TRINITY_DN1834_c0_g1_i1  | dmso | control | -0,3602355 | 5,15208721 | 0,01523003 | 0,06410192 |
| TRINITY_DN13379_c0_g1_i1 | dmso | control | -0,3608193 | 5,20491864 | 0,01381866 | 0,05958523 |
| TRINITY_DN6461_c0_g1_i1  | dmso | control | -0,3611294 | 9,07130185 | 0,00110253 | 0,00805088 |
| TRINITY_DN5893_c0_g1_i1  | dmso | control | -0,3615032 | 5,09428118 | 0,01383278 | 0,05962833 |
| TRINITY_DN453_c0_g1_i1   | dmso | control | -0,3619675 | 4,91029861 | 0,02237931 | 0,08613619 |
| TRINITY_DN32556_c0_g1_i1 | dmso | control | -0,3628451 | 10,6145112 | 0,01016903 | 0,04706458 |
| TRINITY_DN12005_c0_g1_i1 | dmso | control | -0,3628514 | 5,20264528 | 0,01226247 | 0,05456914 |
| TRINITY_DN5314_c0_g1_i1  | dmso | control | -0,3635998 | 5,34808761 | 0,00910119 | 0,04303328 |
| TRINITY_DN20089_c0_g1_i1 | dmso | control | -0,3639081 | 5,1384576  | 0,01702895 | 0,06996108 |
| TRINITY_DN32605_c0_g1_i1 | dmso | control | -0,364035  | 6,37469581 | 0,00491394 | 0,02663484 |
| TRINITY_DN19609_c0_g1_i1 | dmso | control | -0,3642588 | 6,0640794  | 0,00461435 | 0,02539213 |
| TRINITY_DN4105_c0_g1_i1  | dmso | control | -0,3644765 | 5,53809747 | 0,00687723 | 0,03456562 |
| TRINITY_DN11203_c0_g1_i1 | dmso | control | -0,3650097 | 4,96617486 | 0,02489513 | 0,09321155 |
| TRINITY_DN18872_c0_g1_i1 | dmso | control | -0,3651621 | 7,2272029  | 0,00470555 | 0,02577192 |
| TRINITY_DN11110_c0_g1_i1 | dmso | control | -0,3658637 | 5,37588215 | 0,00815775 | 0,03966296 |
| TRINITY_DN19175_c0_g1_i1 | dmso | control | -0,3659842 | 9,79537487 | 0,00323522 | 0,01927124 |
| TRINITY_DN18750_c0_g1_i1 | dmso | control | -0,3661947 | 5,9877111  | 0,00397106 | 0,02257454 |
| TRINITY_DN32409_c0_g1_i1 | dmso | control | -0,3662041 | 6,62548534 | 0,00270403 | 0,01660701 |
| TRINITY_DN5384_c0_g1_i1  | dmso | control | -0,3666266 | 6,45636434 | 0,01687288 | 0,06950809 |
| TRINITY_DN18876_c0_g1_i1 | dmso | control | -0,3667141 | 7,08230406 | 0,00163389 | 0,01110726 |
| TRINITY_DN10734_c0_g1_i1 | dmso | control | -0,3671306 | 6,5759627  | 0,00403243 | 0,02283066 |
| TRINITY_DN20570_c0_g1_i1 | dmso | control | -0,3684931 | 5,91904666 | 0,00848286 | 0,04085857 |
| TRINITY_DN1905_c0_g1_i1  | dmso | control | -0,368603  | 4,36662378 | 0,02369385 | 0,08994946 |
| TRINITY_DN4969_c0_g1_i1  | dmso | control | -0,3694627 | 6,89926667 | 0,02723571 | 0,09990346 |
| TRINITY_DN55_c0_g1_i1    | dmso | control | -0,3696484 | 4,92435727 | 0,01458352 | 0,06190857 |
| TRINITY_DN5542_c0_g1_i1  | dmso | control | -0,3707799 | 6,76342627 | 0,00137661 | 0,00966944 |

|                          |      |         |            |            |            |            |
|--------------------------|------|---------|------------|------------|------------|------------|
| TRINITY_DN7003_c0_g1_i1  | dmso | control | -0,3708469 | 5,97743805 | 0,00415045 | 0,02330092 |
| TRINITY_DN753_c0_g1_i1   | dmso | control | -0,370965  | 6,84690924 | 0,00227086 | 0,01443773 |
| TRINITY_DN11370_c0_g1_i1 | dmso | control | -0,3711487 | 6,44547638 | 0,00338493 | 0,01990819 |
| TRINITY_DN4921_c0_g1_i1  | dmso | control | -0,3714748 | 9,38565269 | 0,005919   | 0,03077774 |
| TRINITY_DN21356_c0_g1_i1 | dmso | control | -0,3714794 | 5,18259414 | 0,0149181  | 0,06312618 |
| TRINITY_DN25409_c0_g1_i1 | dmso | control | -0,3715217 | 5,62125113 | 0,02380993 | 0,09031772 |
| TRINITY_DN20744_c0_g1_i1 | dmso | control | -0,372013  | 6,57268362 | 0,00173791 | 0,01169808 |
| TRINITY_DN10736_c0_g1_i1 | dmso | control | -0,3720713 | 8,83972959 | 0,00113737 | 0,00825597 |
| TRINITY_DN11738_c0_g1_i1 | dmso | control | -0,3722596 | 6,29258406 | 0,00492044 | 0,02666007 |
| TRINITY_DN10899_c0_g1_i1 | dmso | control | -0,3724367 | 10,2833556 | 0,00518355 | 0,02772027 |
| TRINITY_DN11230_c0_g1_i1 | dmso | control | -0,3724764 | 6,9401293  | 0,00209742 | 0,01356187 |
| TRINITY_DN5231_c0_g1_i1  | dmso | control | -0,372571  | 5,30862798 | 0,0135656  | 0,05890057 |
| TRINITY_DN199_c0_g1_i1   | dmso | control | -0,3727539 | 10,4536995 | 0,0042735  | 0,02384347 |
| TRINITY_DN18992_c0_g1_i1 | dmso | control | -0,3727746 | 6,23319195 | 0,00331381 | 0,01960997 |
| TRINITY_DN11879_c0_g1_i1 | dmso | control | -0,3728246 | 5,43185527 | 0,00576797 | 0,03019874 |
| TRINITY_DN11391_c0_g1_i1 | dmso | control | -0,3733931 | 5,09697318 | 0,01123762 | 0,05093422 |
| TRINITY_DN18840_c0_g1_i1 | dmso | control | -0,373775  | 6,95486373 | 0,00245738 | 0,0154133  |
| TRINITY_DN4104_c0_g1_i1  | dmso | control | -0,3739534 | 4,46631773 | 0,01914749 | 0,07659526 |
| TRINITY_DN4453_c0_g1_i1  | dmso | control | -0,3740856 | 5,56885233 | 0,00673714 | 0,03400347 |
| TRINITY_DN11189_c0_g1_i1 | dmso | control | -0,37416   | 8,06980702 | 0,00070698 | 0,00554412 |
| TRINITY_DN20655_c0_g1_i1 | dmso | control | -0,3742978 | 6,04047027 | 0,00289145 | 0,01755653 |
| TRINITY_DN11065_c0_g1_i1 | dmso | control | -0,3746861 | 4,62788205 | 0,01523577 | 0,0641074  |
| TRINITY_DN4902_c0_g1_i1  | dmso | control | -0,3754351 | 6,57701125 | 0,00260164 | 0,0161221  |
| TRINITY_DN1551_c0_g1_i1  | dmso | control | -0,3755395 | 4,33156508 | 0,02510789 | 0,09383176 |
| TRINITY_DN5717_c0_g1_i1  | dmso | control | -0,3758172 | 7,99691993 | 0,00133017 | 0,00941418 |
| TRINITY_DN19572_c0_g1_i1 | dmso | control | -0,376012  | 5,42915845 | 0,01397026 | 0,06000607 |
| TRINITY_DN6073_c0_g1_i1  | dmso | control | -0,3761603 | 5,33983248 | 0,0182227  | 0,07379992 |
| TRINITY_DN25790_c0_g1_i1 | dmso | control | -0,376319  | 6,8893406  | 0,00190396 | 0,01258131 |
| TRINITY_DN10858_c0_g1_i1 | dmso | control | -0,3769686 | 5,14070468 | 0,01080075 | 0,049435   |
| TRINITY_DN4736_c0_g1_i1  | dmso | control | -0,3771734 | 5,84454236 | 0,00275245 | 0,01685425 |
| TRINITY_DN14135_c0_g1_i1 | dmso | control | -0,3774932 | 4,74682552 | 0,01803097 | 0,07318273 |

|                          |      |         |            |            |            |            |
|--------------------------|------|---------|------------|------------|------------|------------|
| TRINITY_DN21357_c0_g1_i1 | dmso | control | -0,3783012 | 4,65213766 | 0,01427371 | 0,06096504 |
| TRINITY_DN1417_c0_g1_i1  | dmso | control | -0,3783443 | 6,57012777 | 0,00107575 | 0,00789597 |
| TRINITY_DN19053_c0_g1_i1 | dmso | control | -0,3783475 | 5,00276517 | 0,01084434 | 0,049556   |
| TRINITY_DN11038_c0_g1_i1 | dmso | control | -0,3787811 | 5,31359413 | 0,00670011 | 0,03386036 |
| TRINITY_DN761_c0_g1_i1   | dmso | control | -0,3790066 | 7,68167961 | 0,00057434 | 0,00466614 |
| TRINITY_DN1261_c0_g1_i1  | dmso | control | -0,3790701 | 7,5687891  | 0,00058565 | 0,00474024 |
| TRINITY_DN14576_c0_g1_i1 | dmso | control | -0,3797986 | 6,7768388  | 0,01355467 | 0,0588864  |
| TRINITY_DN267_c0_g1_i1   | dmso | control | -0,379826  | 8,17490959 | 0,00089767 | 0,00676063 |
| TRINITY_DN4981_c0_g1_i1  | dmso | control | -0,3815541 | 5,82948035 | 0,00321689 | 0,01920167 |
| TRINITY_DN10855_c0_g1_i1 | dmso | control | -0,3826714 | 7,55573396 | 0,00048836 | 0,00405424 |
| TRINITY_DN12219_c0_g1_i1 | dmso | control | -0,3836461 | 6,68463882 | 0,0030688  | 0,01845495 |
| TRINITY_DN4651_c0_g1_i1  | dmso | control | -0,3841173 | 8,58557233 | 0,00118326 | 0,00853278 |
| TRINITY_DN33094_c0_g1_i1 | dmso | control | -0,3845978 | 4,8766902  | 0,02445052 | 0,09188027 |
| TRINITY_DN15114_c0_g1_i1 | dmso | control | -0,3854579 | 5,26155021 | 0,0058045  | 0,03034598 |
| TRINITY_DN11058_c0_g1_i1 | dmso | control | -0,3857455 | 8,73367143 | 0,00067044 | 0,0053124  |
| TRINITY_DN5866_c0_g1_i1  | dmso | control | -0,3858016 | 7,21781585 | 0,00240681 | 0,01516196 |
| TRINITY_DN5746_c0_g1_i1  | dmso | control | -0,3858342 | 5,94199035 | 0,00731976 | 0,03638472 |
| TRINITY_DN8610_c0_g1_i1  | dmso | control | -0,3859166 | 8,46154702 | 0,00110847 | 0,00807867 |
| TRINITY_DN227_c0_g1_i1   | dmso | control | -0,3862357 | 7,53695662 | 0,00162759 | 0,01107945 |
| TRINITY_DN2030_c0_g1_i1  | dmso | control | -0,3869425 | 6,26382634 | 0,00131134 | 0,00931593 |
| TRINITY_DN5473_c0_g1_i1  | dmso | control | -0,3869733 | 5,20574348 | 0,0069655  | 0,03489999 |
| TRINITY_DN5087_c0_g1_i1  | dmso | control | -0,3871358 | 10,4521797 | 0,00019795 | 0,00186887 |
| TRINITY_DN18356_c0_g1_i1 | dmso | control | -0,3872392 | 4,57181217 | 0,01262857 | 0,05593981 |
| TRINITY_DN33651_c0_g1_i1 | dmso | control | -0,387319  | 5,75481298 | 0,00404563 | 0,02287247 |
| TRINITY_DN7169_c0_g1_i1  | dmso | control | -0,387403  | 4,37012567 | 0,01794385 | 0,07289057 |
| TRINITY_DN10894_c0_g1_i1 | dmso | control | -0,3881254 | 4,87572302 | 0,01091246 | 0,04982    |
| TRINITY_DN1650_c0_g1_i1  | dmso | control | -0,3882433 | 4,80430478 | 0,01387308 | 0,05970073 |
| TRINITY_DN5627_c0_g1_i1  | dmso | control | -0,3898364 | 4,85226684 | 0,01133035 | 0,05129015 |
| TRINITY_DN15556_c0_g1_i1 | dmso | control | -0,3900539 | 5,03258904 | 0,00744569 | 0,03683321 |
| TRINITY_DN1194_c0_g1_i1  | dmso | control | -0,3903718 | 7,4328377  | 0,00042466 | 0,00359781 |
| TRINITY_DN6026_c0_g1_i1  | dmso | control | -0,3907696 | 6,51270553 | 0,00177676 | 0,01190412 |

|                          |      |         |            |            |            |            |
|--------------------------|------|---------|------------|------------|------------|------------|
| TRINITY_DN739_c0_g1_i1   | dmso | control | -0,3910451 | 8,65674509 | 0,00031924 | 0,00283434 |
| TRINITY_DN582_c0_g1_i1   | dmso | control | -0,3911421 | 5,9936039  | 0,00477779 | 0,02603514 |
| TRINITY_DN4511_c0_g1_i1  | dmso | control | -0,3911883 | 4,96567623 | 0,01606637 | 0,06692004 |
| TRINITY_DN2041_c0_g1_i1  | dmso | control | -0,3912327 | 6,38727388 | 0,00093365 | 0,00696261 |
| TRINITY_DN708_c0_g1_i1   | dmso | control | -0,3914196 | 6,42130292 | 0,00156961 | 0,01077615 |
| TRINITY_DN4637_c0_g1_i1  | dmso | control | -0,3915124 | 6,62011373 | 0,00093456 | 0,00696578 |
| TRINITY_DN4163_c0_g1_i1  | dmso | control | -0,3916339 | 5,21670314 | 0,0104579  | 0,04808967 |
| TRINITY_DN2113_c0_g1_i1  | dmso | control | -0,3916341 | 7,18112319 | 0,00041579 | 0,00353713 |
| TRINITY_DN103_c0_g1_i1   | dmso | control | -0,3917785 | 10,6214797 | 0,00020949 | 0,00196119 |
| TRINITY_DN18579_c0_g1_i1 | dmso | control | -0,3917905 | 7,19447435 | 0,00072047 | 0,00564072 |
| TRINITY_DN795_c0_g1_i1   | dmso | control | -0,392459  | 7,96055541 | 0,00225816 | 0,0143825  |
| TRINITY_DN573_c0_g1_i1   | dmso | control | -0,3927861 | 5,85316346 | 0,00884494 | 0,04216673 |
| TRINITY_DN4033_c0_g1_i1  | dmso | control | -0,3928417 | 4,92565439 | 0,0093272  | 0,0439437  |
| TRINITY_DN7155_c0_g1_i1  | dmso | control | -0,3930229 | 5,28392844 | 0,00569115 | 0,0299158  |
| TRINITY_DN6349_c0_g1_i1  | dmso | control | -0,3935155 | 5,66873736 | 0,00193573 | 0,0127272  |
| TRINITY_DN5847_c0_g1_i1  | dmso | control | -0,3943848 | 4,67965772 | 0,02260883 | 0,08681377 |
| TRINITY_DN11_c0_g1_i1    | dmso | control | -0,3945757 | 8,55871884 | 0,00314693 | 0,01883851 |
| TRINITY_DN11749_c0_g1_i1 | dmso | control | -0,394912  | 4,04657136 | 0,0251437  | 0,09390624 |
| TRINITY_DN4711_c0_g1_i1  | dmso | control | -0,3953403 | 5,70923231 | 0,00220981 | 0,01416179 |
| TRINITY_DN13204_c0_g1_i1 | dmso | control | -0,3958027 | 5,44936375 | 0,00407077 | 0,02295169 |
| TRINITY_DN32299_c0_g1_i1 | dmso | control | -0,3959329 | 8,62002754 | 0,00281869 | 0,01720149 |
| TRINITY_DN11648_c0_g1_i1 | dmso | control | -0,3962542 | 6,14935563 | 0,00187021 | 0,01239226 |
| TRINITY_DN12139_c0_g1_i1 | dmso | control | -0,3965434 | 4,12539073 | 0,02523803 | 0,09417806 |
| TRINITY_DN4723_c0_g1_i1  | dmso | control | -0,3971068 | 9,86311204 | 0,00398013 | 0,02259947 |
| TRINITY_DN4608_c0_g1_i1  | dmso | control | -0,3978015 | 5,44867126 | 0,00328046 | 0,01947733 |
| TRINITY_DN4771_c0_g1_i1  | dmso | control | -0,3983295 | 8,75472283 | 0,00030402 | 0,00271256 |
| TRINITY_DN19138_c0_g1_i1 | dmso | control | -0,3984201 | 7,0387675  | 0,00038891 | 0,00333009 |
| TRINITY_DN11644_c0_g1_i1 | dmso | control | -0,3986504 | 6,57804394 | 0,00153245 | 0,01056119 |
| TRINITY_DN2775_c0_g1_i1  | dmso | control | -0,4000862 | 4,46964561 | 0,01836411 | 0,07418053 |
| TRINITY_DN5589_c0_g1_i1  | dmso | control | -0,4006321 | 5,36328995 | 0,00595889 | 0,03093647 |
| TRINITY_DN18912_c0_g1_i1 | dmso | control | -0,4014479 | 5,17573956 | 0,00471248 | 0,02579451 |

|                          |      |         |            |            |            |            |
|--------------------------|------|---------|------------|------------|------------|------------|
| TRINITY_DN11284_c0_g1_i1 | dmso | control | -0,4018016 | 6,25385292 | 0,00151952 | 0,01048334 |
| TRINITY_DN440_c0_g1_i1   | dmso | control | -0,4019708 | 5,75644996 | 0,00252346 | 0,01575257 |
| TRINITY_DN37432_c0_g1_i1 | dmso | control | -0,4022926 | 6,7187865  | 0,00139313 | 0,0097641  |
| TRINITY_DN19064_c0_g1_i1 | dmso | control | -0,4025025 | 6,72202571 | 0,00043876 | 0,00369853 |
| TRINITY_DN11111_c0_g1_i1 | dmso | control | -0,4032023 | 4,90094416 | 0,01508465 | 0,06360583 |
| TRINITY_DN8567_c0_g1_i1  | dmso | control | -0,4036232 | 4,20590568 | 0,01759538 | 0,07181839 |
| TRINITY_DN2852_c0_g1_i1  | dmso | control | -0,4037703 | 7,01693821 | 0,00091895 | 0,00688036 |
| TRINITY_DN19815_c0_g1_i1 | dmso | control | -0,4048265 | 3,89437983 | 0,02622561 | 0,09691197 |
| TRINITY_DN5991_c0_g1_i1  | dmso | control | -0,4051791 | 7,90673148 | 0,00036154 | 0,00313425 |
| TRINITY_DN10702_c0_g1_i1 | dmso | control | -0,4054982 | 8,48203933 | 0,00014437 | 0,00143034 |
| TRINITY_DN20005_c0_g1_i1 | dmso | control | -0,4056057 | 5,4910927  | 0,00399114 | 0,02264415 |
| TRINITY_DN785_c0_g1_i1   | dmso | control | -0,4056094 | 7,79260191 | 0,00038886 | 0,00333009 |
| TRINITY_DN4795_c0_g1_i1  | dmso | control | -0,4058463 | 5,36991256 | 0,00623775 | 0,03209988 |
| TRINITY_DN4253_c0_g1_i1  | dmso | control | -0,4060546 | 6,73140533 | 0,00059469 | 0,0047937  |
| TRINITY_DN12157_c0_g1_i1 | dmso | control | -0,4062184 | 5,00172724 | 0,00509014 | 0,02733347 |
| TRINITY_DN11685_c0_g1_i1 | dmso | control | -0,4065534 | 6,86349759 | 0,00129899 | 0,00924334 |
| TRINITY_DN4123_c0_g1_i1  | dmso | control | -0,4069997 | 8,63678423 | 0,00152106 | 0,01048767 |
| TRINITY_DN13711_c0_g1_i1 | dmso | control | -0,4076376 | 7,50818326 | 0,00065082 | 0,00518742 |
| TRINITY_DN6981_c0_g1_i1  | dmso | control | -0,4077482 | 6,62900537 | 0,00041841 | 0,00355317 |
| TRINITY_DN5349_c0_g1_i1  | dmso | control | -0,4078686 | 4,24791799 | 0,01592845 | 0,06649897 |
| TRINITY_DN20721_c0_g1_i1 | dmso | control | -0,4081661 | 5,15312367 | 0,00879901 | 0,04198935 |
| TRINITY_DN19324_c0_g1_i1 | dmso | control | -0,4082384 | 5,2363856  | 0,00827296 | 0,0400613  |
| TRINITY_DN7746_c0_g1_i1  | dmso | control | -0,4083076 | 5,39112421 | 0,00297811 | 0,01798445 |
| TRINITY_DN10952_c0_g1_i1 | dmso | control | -0,4084519 | 6,75861616 | 0,00047374 | 0,0039527  |
| TRINITY_DN11308_c0_g1_i1 | dmso | control | -0,4086139 | 7,18540736 | 0,0003467  | 0,0030297  |
| TRINITY_DN19037_c0_g1_i1 | dmso | control | -0,4086887 | 10,2056845 | 0,00868375 | 0,04154911 |
| TRINITY_DN1765_c0_g1_i1  | dmso | control | -0,4098047 | 5,47018299 | 0,00229669 | 0,01456067 |
| TRINITY_DN11676_c0_g1_i1 | dmso | control | -0,4106661 | 4,66301416 | 0,02310716 | 0,08821294 |
| TRINITY_DN510_c0_g1_i1   | dmso | control | -0,410741  | 5,95341344 | 0,00090006 | 0,00676678 |
| TRINITY_DN8278_c0_g1_i1  | dmso | control | -0,4107566 | 5,07664001 | 0,00644722 | 0,03290816 |
| TRINITY_DN8943_c0_g1_i1  | dmso | control | -0,410829  | 4,55886633 | 0,01917266 | 0,0766321  |

|                          |      |         |            |            |            |            |
|--------------------------|------|---------|------------|------------|------------|------------|
| TRINITY_DN13314_c0_g1_i1 | dmso | control | -0,4117839 | 5,63722638 | 0,0013184  | 0,00935062 |
| TRINITY_DN852_c0_g1_i1   | dmso | control | -0,4119578 | 6,70485852 | 0,00122924 | 0,00882525 |
| TRINITY_DN10991_c0_g1_i1 | dmso | control | -0,4123772 | 8,89054261 | 0,00108725 | 0,00795209 |
| TRINITY_DN23616_c0_g1_i1 | dmso | control | -0,412403  | 3,69767237 | 0,02551736 | 0,09495061 |
| TRINITY_DN1456_c0_g1_i1  | dmso | control | -0,4127563 | 7,08254709 | 0,00087836 | 0,00664636 |
| TRINITY_DN18941_c0_g1_i1 | dmso | control | -0,413324  | 4,81124287 | 0,00620897 | 0,03197935 |
| TRINITY_DN21829_c0_g1_i1 | dmso | control | -0,4134141 | 3,92782058 | 0,02067855 | 0,08119101 |
| TRINITY_DN28306_c0_g1_i1 | dmso | control | -0,4134527 | 4,08094815 | 0,01700727 | 0,06993167 |
| TRINITY_DN20448_c0_g1_i1 | dmso | control | -0,4158855 | 4,09128761 | 0,01962889 | 0,07811    |
| TRINITY_DN10761_c0_g1_i1 | dmso | control | -0,4168442 | 6,79124742 | 0,0024501  | 0,01538101 |
| TRINITY_DN3101_c0_g1_i1  | dmso | control | -0,4180464 | 4,06059324 | 0,02062168 | 0,08103379 |
| TRINITY_DN11751_c0_g1_i1 | dmso | control | -0,4182892 | 4,53126255 | 0,00692145 | 0,03471539 |
| TRINITY_DN18956_c0_g1_i1 | dmso | control | -0,4184879 | 6,23590754 | 0,00034659 | 0,0030297  |
| TRINITY_DN19189_c0_g1_i1 | dmso | control | -0,418866  | 6,48075901 | 0,00038799 | 0,00332608 |
| TRINITY_DN11048_c0_g1_i1 | dmso | control | -0,419016  | 5,70441371 | 0,00186189 | 0,01234847 |
| TRINITY_DN18946_c0_g1_i1 | dmso | control | -0,4193659 | 5,24003708 | 0,00955896 | 0,04484403 |
| TRINITY_DN15881_c0_g1_i1 | dmso | control | -0,4197651 | 4,3318642  | 0,01328987 | 0,05803269 |
| TRINITY_DN5728_c0_g1_i1  | dmso | control | -0,4214832 | 4,85697339 | 0,01192229 | 0,0533181  |
| TRINITY_DN6687_c0_g1_i1  | dmso | control | -0,4227937 | 5,16551471 | 0,00498756 | 0,02690267 |
| TRINITY_DN17872_c0_g1_i1 | dmso | control | -0,4228048 | 3,82796625 | 0,02600342 | 0,09633377 |
| TRINITY_DN3679_c0_g1_i1  | dmso | control | -0,4229967 | 4,29317663 | 0,01091613 | 0,04982101 |
| TRINITY_DN2521_c0_g1_i1  | dmso | control | -0,4232663 | 4,97085738 | 0,00365393 | 0,02116429 |
| TRINITY_DN6809_c0_g1_i1  | dmso | control | -0,4251526 | 4,78854404 | 0,01068706 | 0,04894564 |
| TRINITY_DN20735_c0_g1_i1 | dmso | control | -0,4255998 | 5,0926423  | 0,00370444 | 0,02137006 |
| TRINITY_DN4798_c0_g1_i1  | dmso | control | -0,4263128 | 10,0032748 | 0,00314597 | 0,01883851 |
| TRINITY_DN19023_c0_g1_i1 | dmso | control | -0,4263713 | 3,99954874 | 0,01649696 | 0,06822174 |
| TRINITY_DN14396_c0_g1_i1 | dmso | control | -0,4266049 | 5,14213315 | 0,00357873 | 0,02081946 |
| TRINITY_DN10703_c0_g1_i1 | dmso | control | -0,4285412 | 11,9257634 | 0,00067953 | 0,00537557 |
| TRINITY_DN4905_c0_g1_i1  | dmso | control | -0,4286074 | 6,8743441  | 0,00019547 | 0,00184786 |
| TRINITY_DN10883_c0_g1_i1 | dmso | control | -0,4286956 | 7,58468903 | 0,00025334 | 0,00231317 |
| TRINITY_DN218_c0_g1_i1   | dmso | control | -0,4289069 | 8,50108601 | 0,00021729 | 0,00202107 |

|                          |      |         |            |            |            |            |
|--------------------------|------|---------|------------|------------|------------|------------|
| TRINITY_DN1579_c0_g1_i1  | dmso | control | -0,4289521 | 5,97295583 | 0,00128556 | 0,00917488 |
| TRINITY_DN34091_c0_g1_i1 | dmso | control | -0,428967  | 3,99687437 | 0,01350233 | 0,05872965 |
| TRINITY_DN14963_c0_g1_i1 | dmso | control | -0,4293787 | 3,50589677 | 0,02517782 | 0,09397767 |
| TRINITY_DN19497_c0_g1_i1 | dmso | control | -0,4304639 | 4,22974569 | 0,01017207 | 0,04706458 |
| TRINITY_DN14012_c0_g1_i1 | dmso | control | -0,4305463 | 5,04569749 | 0,00288046 | 0,01750452 |
| TRINITY_DN7714_c0_g1_i1  | dmso | control | -0,4310484 | 4,7080969  | 0,00495522 | 0,02677823 |
| TRINITY_DN13409_c0_g1_i1 | dmso | control | -0,4318292 | 3,81097473 | 0,02022318 | 0,07992443 |
| TRINITY_DN33577_c0_g1_i1 | dmso | control | -0,4327081 | 4,16789658 | 0,0179025  | 0,07275289 |
| TRINITY_DN19059_c0_g1_i1 | dmso | control | -0,4328849 | 5,97080806 | 0,00081834 | 0,00627108 |
| TRINITY_DN19119_c0_g1_i1 | dmso | control | -0,4330534 | 3,93596425 | 0,0175764  | 0,07180179 |
| TRINITY_DN1142_c0_g1_i1  | dmso | control | -0,4336558 | 8,62095622 | 0,00011343 | 0,00116451 |
| TRINITY_DN21116_c0_g1_i1 | dmso | control | -0,4351251 | 7,00257513 | 0,00016294 | 0,00158174 |
| TRINITY_DN5149_c0_g1_i1  | dmso | control | -0,4355027 | 6,4502271  | 0,00023732 | 0,00218771 |
| TRINITY_DN8124_c0_g1_i1  | dmso | control | -0,4359931 | 3,7950285  | 0,01889585 | 0,07586173 |
| TRINITY_DN13984_c0_g1_i1 | dmso | control | -0,4360401 | 4,81696767 | 0,00421731 | 0,02361201 |
| TRINITY_DN11577_c0_g1_i1 | dmso | control | -0,4363093 | 4,98859005 | 0,00457928 | 0,02526649 |
| TRINITY_DN13959_c0_g1_i1 | dmso | control | -0,4363531 | 4,01984791 | 0,01554924 | 0,06512287 |
| TRINITY_DN6294_c0_g1_i1  | dmso | control | -0,4364739 | 4,27391055 | 0,01439297 | 0,06129318 |
| TRINITY_DN5203_c0_g1_i1  | dmso | control | -0,4367538 | 5,30817409 | 0,0103614  | 0,04778747 |
| TRINITY_DN1104_c0_g1_i1  | dmso | control | -0,436847  | 5,55445311 | 0,00148815 | 0,01030504 |
| TRINITY_DN1002_c0_g1_i1  | dmso | control | -0,4371638 | 8,44939385 | 5,79E-05   | 0,00065474 |
| TRINITY_DN6271_c0_g1_i1  | dmso | control | -0,4376587 | 3,90583589 | 0,01726697 | 0,07077631 |
| TRINITY_DN1140_c0_g1_i1  | dmso | control | -0,4379674 | 4,70069046 | 0,00674048 | 0,03400849 |
| TRINITY_DN34050_c0_g1_i1 | dmso | control | -0,4381688 | 6,21571983 | 0,00055376 | 0,00452437 |
| TRINITY_DN678_c0_g1_i1   | dmso | control | -0,4386097 | 7,16878534 | 0,00040822 | 0,00347891 |
| TRINITY_DN6085_c0_g1_i1  | dmso | control | -0,4387289 | 4,84634265 | 0,00501024 | 0,02697462 |
| TRINITY_DN32288_c0_g1_i1 | dmso | control | -0,4394875 | 8,28327101 | 0,00810693 | 0,03944246 |
| TRINITY_DN6310_c0_g1_i1  | dmso | control | -0,4399821 | 4,1146286  | 0,01274455 | 0,05634985 |
| TRINITY_DN5322_c0_g1_i1  | dmso | control | -0,4403021 | 9,07314025 | 0,0026983  | 0,01658075 |
| TRINITY_DN6712_c0_g1_i1  | dmso | control | -0,4403712 | 6,8633296  | 0,00035787 | 0,00311222 |
| TRINITY_DN4880_c0_g1_i1  | dmso | control | -0,4406068 | 4,96304994 | 0,00799685 | 0,03903834 |



|                          |      |         |            |            |            |            |
|--------------------------|------|---------|------------|------------|------------|------------|
| TRINITY_DN6943_c0_g1_i1  | dmso | control | -0,4410124 | 6,1425972  | 0,00224748 | 0,01433863 |
| TRINITY_DN8083_c0_g1_i1  | dmso | control | -0,441621  | 4,69979139 | 0,0037885  | 0,0217421  |
| TRINITY_DN14710_c0_g1_i1 | dmso | control | -0,4420156 | 3,34847455 | 0,02480966 | 0,09296381 |
| TRINITY_DN11271_c0_g1_i1 | dmso | control | -0,442253  | 5,21846395 | 0,00428652 | 0,02389765 |
| TRINITY_DN10902_c0_g1_i1 | dmso | control | -0,4436179 | 7,61160411 | 0,00028789 | 0,0025878  |
| TRINITY_DN2937_c0_g1_i1  | dmso | control | -0,4447326 | 6,77934232 | 0,00021041 | 0,00196723 |
| TRINITY_DN3321_c0_g1_i1  | dmso | control | -0,4454241 | 4,8058933  | 0,00719673 | 0,03585951 |
| TRINITY_DN3756_c0_g1_i1  | dmso | control | -0,445773  | 4,51439706 | 0,0069066  | 0,03466497 |
| TRINITY_DN6132_c0_g1_i1  | dmso | control | -0,446883  | 5,99367802 | 0,00125146 | 0,00896252 |
| TRINITY_DN10919_c0_g1_i1 | dmso | control | -0,4477436 | 4,99538595 | 0,00241896 | 0,01521861 |
| TRINITY_DN24141_c0_g1_i1 | dmso | control | -0,4478511 | 3,76279293 | 0,02141836 | 0,08338089 |
| TRINITY_DN855_c0_g1_i1   | dmso | control | -0,4481739 | 3,72267315 | 0,01458462 | 0,06190857 |
| TRINITY_DN19751_c0_g1_i1 | dmso | control | -0,4483568 | 3,57228832 | 0,02505191 | 0,09365292 |
| TRINITY_DN675_c0_g1_i1   | dmso | control | -0,4484281 | 7,47342217 | 0,00020485 | 0,00192157 |
| TRINITY_DN32907_c0_g1_i1 | dmso | control | -0,4485625 | 6,0702269  | 0,0014741  | 0,01023225 |
| TRINITY_DN3232_c0_g1_i1  | dmso | control | -0,4488961 | 4,21693548 | 0,00743604 | 0,03679806 |
| TRINITY_DN5378_c0_g1_i1  | dmso | control | -0,4489721 | 3,83223816 | 0,01864934 | 0,07508074 |
| TRINITY_DN750_c0_g1_i1   | dmso | control | -0,4497929 | 7,27161316 | 4,42E-05   | 0,00051366 |
| TRINITY_DN9584_c0_g1_i1  | dmso | control | -0,4500037 | 3,91767632 | 0,01418699 | 0,06068435 |
| TRINITY_DN13777_c0_g1_i1 | dmso | control | -0,4500577 | 3,55782133 | 0,02267055 | 0,08693285 |
| TRINITY_DN11171_c0_g1_i1 | dmso | control | -0,450177  | 6,00756015 | 0,00053278 | 0,00438022 |
| TRINITY_DN18721_c0_g1_i1 | dmso | control | -0,4508766 | 7,47192586 | 3,82E-05   | 0,00045268 |
| TRINITY_DN2349_c0_g1_i1  | dmso | control | -0,4514609 | 4,06882475 | 0,00972309 | 0,04546782 |
| TRINITY_DN8891_c0_g1_i1  | dmso | control | -0,4524159 | 3,56218047 | 0,01987106 | 0,07885644 |
| TRINITY_DN3408_c0_g1_i1  | dmso | control | -0,4527472 | 3,48473832 | 0,02179225 | 0,08448445 |
| TRINITY_DN12612_c0_g1_i1 | dmso | control | -0,4530589 | 5,92373534 | 0,00089899 | 0,00676349 |
| TRINITY_DN1093_c0_g1_i1  | dmso | control | -0,4536517 | 6,77538202 | 0,00010747 | 0,00111208 |
| TRINITY_DN5327_c0_g1_i1  | dmso | control | -0,4542091 | 6,24484546 | 0,00011299 | 0,00116087 |
| TRINITY_DN12160_c0_g1_i1 | dmso | control | -0,4543774 | 8,20355187 | 3,60E-05   | 0,00042971 |
| TRINITY_DN14681_c0_g1_i1 | dmso | control | -0,4549418 | 3,8305282  | 0,02583431 | 0,09585835 |
| TRINITY_DN19868_c0_g1_i1 | dmso | control | -0,4549584 | 4,25230646 | 0,00630311 | 0,03230956 |

|                          |      |         |            |            |            |            |
|--------------------------|------|---------|------------|------------|------------|------------|
| TRINITY_DN5761_c0_g1_i1  | dmso | control | -0,4560932 | 7,0695004  | 4,46E-05   | 0,0005174  |
| TRINITY_DN20662_c0_g1_i1 | dmso | control | -0,4573915 | 4,44392443 | 0,00464922 | 0,02551594 |
| TRINITY_DN19081_c0_g1_i1 | dmso | control | -0,4577493 | 6,07375237 | 0,01481489 | 0,06276849 |
| TRINITY_DN9556_c0_g1_i1  | dmso | control | -0,4586754 | 3,6344842  | 0,01807829 | 0,07333358 |
| TRINITY_DN22586_c0_g1_i1 | dmso | control | -0,459027  | 3,10374563 | 0,02669284 | 0,09828652 |
| TRINITY_DN34975_c0_g1_i1 | dmso | control | -0,4596244 | 4,07749189 | 0,01770407 | 0,07218042 |
| TRINITY_DN5282_c0_g1_i1  | dmso | control | -0,459734  | 6,60132439 | 0,00155198 | 0,01068382 |
| TRINITY_DN12122_c0_g1_i1 | dmso | control | -0,4597448 | 4,59409832 | 0,0047646  | 0,02600101 |
| TRINITY_DN4749_c0_g1_i1  | dmso | control | -0,4597506 | 5,99331196 | 0,00083429 | 0,00637633 |
| TRINITY_DN10689_c0_g1_i1 | dmso | control | -0,4598305 | 5,24387635 | 0,00179082 | 0,01198721 |
| TRINITY_DN19645_c0_g1_i1 | dmso | control | -0,4602566 | 3,69415747 | 0,01783059 | 0,07255292 |
| TRINITY_DN363_c0_g1_i1   | dmso | control | -0,4612857 | 7,13018402 | 0,00357197 | 0,02079959 |
| TRINITY_DN1843_c0_g1_i1  | dmso | control | -0,4617227 | 7,82356239 | 6,62E-05   | 0,00073422 |
| TRINITY_DN19441_c0_g1_i1 | dmso | control | -0,4618749 | 5,34137611 | 0,0015197  | 0,01048334 |
| TRINITY_DN7443_c0_g1_i1  | dmso | control | -0,4620323 | 4,18043026 | 0,00947734 | 0,04456387 |
| TRINITY_DN243_c0_g1_i1   | dmso | control | -0,4621133 | 5,0864513  | 0,00280302 | 0,01713484 |
| TRINITY_DN13419_c0_g1_i1 | dmso | control | -0,4622104 | 3,4531998  | 0,02054167 | 0,08080731 |
| TRINITY_DN12995_c0_g1_i1 | dmso | control | -0,4626704 | 3,85963948 | 0,00983814 | 0,04591662 |
| TRINITY_DN7455_c0_g1_i1  | dmso | control | -0,4631138 | 4,26941018 | 0,00546443 | 0,02895589 |
| TRINITY_DN12700_c0_g1_i1 | dmso | control | -0,4631589 | 3,33581266 | 0,02119691 | 0,08276571 |
| TRINITY_DN2289_c0_g1_i1  | dmso | control | -0,4642969 | 4,62537164 | 0,00390761 | 0,02227524 |
| TRINITY_DN3289_c0_g1_i1  | dmso | control | -0,4648912 | 5,89031714 | 0,00061785 | 0,00495276 |
| TRINITY_DN18984_c0_g1_i1 | dmso | control | -0,4655364 | 9,3027627  | 0,00083819 | 0,00640278 |
| TRINITY_DN4027_c0_g1_i1  | dmso | control | -0,4655849 | 6,57980361 | 0,00012058 | 0,00122746 |
| TRINITY_DN614_c0_g1_i1   | dmso | control | -0,466009  | 5,43705703 | 0,00111275 | 0,00810576 |
| TRINITY_DN7473_c0_g1_i1  | dmso | control | -0,4675    | 5,30136829 | 0,00096123 | 0,00713512 |
| TRINITY_DN11215_c0_g1_i1 | dmso | control | -0,4677475 | 5,35897989 | 0,00058955 | 0,00476023 |
| TRINITY_DN11612_c0_g1_i1 | dmso | control | -0,4685276 | 3,12400058 | 0,02152795 | 0,08368758 |
| TRINITY_DN6381_c0_g1_i1  | dmso | control | -0,4693001 | 5,44718614 | 0,00143755 | 0,01002194 |
| TRINITY_DN13086_c0_g1_i1 | dmso | control | -0,4698739 | 3,47666005 | 0,01580755 | 0,06605631 |
| TRINITY_DN12943_c0_g1_i1 | dmso | control | -0,4712001 | 4,9612551  | 0,00174155 | 0,01171712 |

|                          |      |         |            |            |            |            |
|--------------------------|------|---------|------------|------------|------------|------------|
| TRINITY_DN34594_c0_g1_i1 | dmso | control | -0,4713272 | 4,68253496 | 0,00489845 | 0,02657083 |
| TRINITY_DN2487_c0_g1_i1  | dmso | control | -0,4721951 | 4,33501163 | 0,00401747 | 0,0227578  |
| TRINITY_DN2562_c0_g1_i1  | dmso | control | -0,4722283 | 3,64570709 | 0,02199593 | 0,08490948 |
| TRINITY_DN11163_c0_g1_i1 | dmso | control | -0,4722435 | 7,49978631 | 0,000101   | 0,00105415 |
| TRINITY_DN25969_c0_g1_i1 | dmso | control | -0,4740444 | 4,46266397 | 0,00611545 | 0,03159178 |
| TRINITY_DN6324_c0_g1_i1  | dmso | control | -0,4743351 | 4,10051845 | 0,0090845  | 0,04299039 |
| TRINITY_DN24614_c0_g1_i1 | dmso | control | -0,4744942 | 3,9626836  | 0,01601403 | 0,06679836 |
| TRINITY_DN10783_c0_g1_i1 | dmso | control | -0,4746635 | 4,87617503 | 0,00537593 | 0,02857078 |
| TRINITY_DN11898_c0_g1_i1 | dmso | control | -0,4753016 | 4,11743118 | 0,00898387 | 0,04263518 |
| TRINITY_DN20713_c0_g1_i1 | dmso | control | -0,4753438 | 3,06880315 | 0,02164685 | 0,0840561  |
| TRINITY_DN7428_c0_g1_i1  | dmso | control | -0,4755494 | 6,25180109 | 0,00075574 | 0,0058818  |
| TRINITY_DN24448_c0_g1_i1 | dmso | control | -0,4756128 | 4,13329362 | 0,00620019 | 0,03196349 |
| TRINITY_DN19581_c0_g1_i1 | dmso | control | -0,4762295 | 4,69336168 | 0,0019015  | 0,01257799 |
| TRINITY_DN2858_c0_g1_i1  | dmso | control | -0,476271  | 3,73207105 | 0,0198227  | 0,07877272 |
| TRINITY_DN13077_c0_g1_i1 | dmso | control | -0,4771837 | 3,82193244 | 0,0085225  | 0,04100847 |
| TRINITY_DN689_c0_g1_i1   | dmso | control | -0,4773323 | 7,3203739  | 2,22E-05   | 0,00027925 |
| TRINITY_DN1997_c0_g1_i1  | dmso | control | -0,4774032 | 6,19002581 | 5,84E-05   | 0,00065891 |
| TRINITY_DN21462_c0_g1_i1 | dmso | control | -0,4782492 | 3,88692209 | 0,01147684 | 0,05175863 |
| TRINITY_DN12206_c0_g1_i1 | dmso | control | -0,478284  | 4,24331792 | 0,00532184 | 0,02832498 |
| TRINITY_DN12859_c0_g1_i1 | dmso | control | -0,478287  | 5,6938245  | 0,00096976 | 0,00719106 |
| TRINITY_DN4214_c0_g1_i1  | dmso | control | -0,4790396 | 6,73774521 | 2,63E-05   | 0,00032595 |
| TRINITY_DN18626_c0_g1_i1 | dmso | control | -0,4795655 | 5,5725373  | 0,00027694 | 0,00250185 |
| TRINITY_DN19001_c0_g1_i1 | dmso | control | -0,4796802 | 4,47127614 | 0,00236538 | 0,01494662 |
| TRINITY_DN11429_c0_g1_i1 | dmso | control | -0,4797319 | 8,98501436 | 0,00095432 | 0,00708747 |
| TRINITY_DN32305_c0_g1_i1 | dmso | control | -0,4798757 | 4,6060039  | 0,00760777 | 0,0374955  |
| TRINITY_DN4712_c0_g1_i1  | dmso | control | -0,4799082 | 7,7852248  | 1,22E-05   | 0,00016705 |
| TRINITY_DN19649_c0_g1_i1 | dmso | control | -0,4803251 | 3,54027262 | 0,0128177  | 0,05653315 |
| TRINITY_DN13275_c0_g1_i1 | dmso | control | -0,4804117 | 5,25856464 | 0,0010823  | 0,00792986 |
| TRINITY_DN4666_c0_g1_i1  | dmso | control | -0,4805778 | 5,40690618 | 0,00115075 | 0,00832791 |
| TRINITY_DN1727_c0_g1_i1  | dmso | control | -0,4814302 | 4,76712708 | 0,00314543 | 0,01883851 |
| TRINITY_DN9155_c0_g1_i1  | dmso | control | -0,4823042 | 3,12578043 | 0,02054815 | 0,08081078 |

|                          |      |         |            |            |            |            |
|--------------------------|------|---------|------------|------------|------------|------------|
| TRINITY_DN11081_c0_g1_i1 | dmso | control | -0,4823201 | 7,04737471 | 0,00016287 | 0,00158174 |
| TRINITY_DN20504_c0_g1_i1 | dmso | control | -0,4823932 | 3,21376576 | 0,0162656  | 0,06757452 |
| TRINITY_DN416_c0_g1_i1   | dmso | control | -0,4824811 | 7,85047426 | 6,83E-05   | 0,00075465 |
| TRINITY_DN11156_c0_g1_i1 | dmso | control | -0,4842097 | 3,76861145 | 0,01817108 | 0,07364795 |
| TRINITY_DN20340_c0_g1_i1 | dmso | control | -0,486738  | 4,22939928 | 0,00410495 | 0,02310833 |
| TRINITY_DN3088_c0_g1_i1  | dmso | control | -0,4875223 | 4,02029069 | 0,00591428 | 0,03077514 |
| TRINITY_DN604_c0_g1_i1   | dmso | control | -0,4877454 | 5,51696434 | 0,00028267 | 0,00254724 |
| TRINITY_DN688_c0_g1_i1   | dmso | control | -0,4883829 | 6,09818166 | 0,00014404 | 0,00142902 |
| TRINITY_DN14091_c0_g1_i1 | dmso | control | -0,4884071 | 2,78656879 | 0,02688654 | 0,09879829 |
| TRINITY_DN1224_c0_g1_i1  | dmso | control | -0,4889009 | 4,47805437 | 0,02171388 | 0,08420322 |
| TRINITY_DN32650_c0_g1_i1 | dmso | control | -0,489063  | 11,5921986 | 5,60E-05   | 0,00063497 |
| TRINITY_DN16889_c0_g1_i1 | dmso | control | -0,4892084 | 5,07480027 | 0,0012585  | 0,00900398 |
| TRINITY_DN18886_c0_g1_i1 | dmso | control | -0,4902123 | 4,82964986 | 0,00155409 | 0,01068485 |
| TRINITY_DN14162_c0_g1_i1 | dmso | control | -0,490417  | 3,89203933 | 0,00844718 | 0,04076828 |
| TRINITY_DN32576_c0_g1_i1 | dmso | control | -0,4908037 | 4,15945141 | 0,00996113 | 0,046326   |
| TRINITY_DN11596_c0_g1_i1 | dmso | control | -0,4914692 | 5,53888747 | 0,00254807 | 0,01585138 |
| TRINITY_DN7088_c0_g1_i1  | dmso | control | -0,4922392 | 4,0867137  | 0,00967578 | 0,04529264 |
| TRINITY_DN9658_c0_g1_i1  | dmso | control | -0,4923026 | 4,10617453 | 0,01199931 | 0,05361275 |
| TRINITY_DN4842_c0_g1_i1  | dmso | control | -0,4937768 | 6,58632054 | 0,000917   | 0,00687039 |
| TRINITY_DN2285_c0_g1_i1  | dmso | control | -0,4943471 | 7,18481547 | 7,85E-06   | 0,00011251 |
| TRINITY_DN1489_c0_g1_i1  | dmso | control | -0,4946358 | 3,69687388 | 0,00896829 | 0,0426001  |
| TRINITY_DN14314_c0_g1_i1 | dmso | control | -0,4948135 | 4,14597275 | 0,00387305 | 0,02210439 |
| TRINITY_DN303_c0_g1_i1   | dmso | control | -0,494816  | 4,79574933 | 0,00137695 | 0,00966944 |
| TRINITY_DN18905_c0_g1_i1 | dmso | control | -0,4951705 | 4,72770277 | 0,00201508 | 0,01314741 |
| TRINITY_DN32837_c0_g1_i1 | dmso | control | -0,4953778 | 6,45186478 | 8,52E-05   | 0,00090999 |
| TRINITY_DN7715_c0_g1_i1  | dmso | control | -0,4961864 | 3,392853   | 0,01357882 | 0,05892041 |
| TRINITY_DN27420_c0_g1_i1 | dmso | control | -0,4970653 | 4,5139475  | 0,00715469 | 0,03573632 |
| TRINITY_DN5795_c0_g1_i1  | dmso | control | -0,4973658 | 4,81747871 | 0,00112852 | 0,00821236 |
| TRINITY_DN1502_c0_g1_i1  | dmso | control | -0,4975061 | 6,1988091  | 4,02E-05   | 0,000473   |
| TRINITY_DN32503_c0_g1_i1 | dmso | control | -0,4978743 | 3,97931843 | 0,00559857 | 0,02947208 |
| TRINITY_DN4716_c0_g1_i1  | dmso | control | -0,4979895 | 5,84241991 | 0,00033714 | 0,0029695  |

|                          |      |         |            |            |            |            |
|--------------------------|------|---------|------------|------------|------------|------------|
| TRINITY_DN11641_c0_g1_i1 | dmso | control | -0,4994866 | 5,15197031 | 0,00193133 | 0,01270401 |
| TRINITY_DN838_c0_g1_i1   | dmso | control | -0,5004341 | 6,32503081 | 1,90E-05   | 0,00024568 |
| TRINITY_DN19223_c0_g1_i1 | dmso | control | -0,5004484 | 4,64538198 | 0,00137102 | 0,00964183 |
| TRINITY_DN15394_c0_g1_i1 | dmso | control | -0,5006465 | 3,09165032 | 0,02190684 | 0,08474674 |
| TRINITY_DN20500_c0_g1_i1 | dmso | control | -0,5034698 | 2,81200998 | 0,02130945 | 0,08301377 |
| TRINITY_DN10974_c0_g1_i1 | dmso | control | -0,5036924 | 5,23956279 | 0,00081533 | 0,00625487 |
| TRINITY_DN13965_c0_g1_i1 | dmso | control | -0,5038594 | 3,22785726 | 0,02065567 | 0,08114527 |
| TRINITY_DN40316_c0_g1_i1 | dmso | control | -0,5042237 | 2,80502067 | 0,02142101 | 0,08338089 |
| TRINITY_DN42536_c0_g1_i1 | dmso | control | -0,5045629 | 2,77368035 | 0,0267651  | 0,09847728 |
| TRINITY_DN18957_c0_g1_i1 | dmso | control | -0,5052373 | 3,62508216 | 0,01209939 | 0,05394311 |
| TRINITY_DN13601_c0_g1_i1 | dmso | control | -0,5054696 | 2,63535864 | 0,0266669  | 0,0982411  |
| TRINITY_DN37772_c0_g1_i1 | dmso | control | -0,5060521 | 4,84968134 | 0,00123221 | 0,0088378  |
| TRINITY_DN8391_c0_g1_i1  | dmso | control | -0,5062636 | 2,74214942 | 0,02301515 | 0,08797403 |
| TRINITY_DN294_c0_g1_i1   | dmso | control | -0,5063284 | 8,11447741 | 8,66E-06   | 0,00012238 |
| TRINITY_DN4932_c0_g1_i1  | dmso | control | -0,5065113 | 6,32097327 | 4,22E-05   | 0,00049273 |
| TRINITY_DN46197_c0_g1_i1 | dmso | control | -0,5065968 | 3,15099221 | 0,01822431 | 0,07379992 |
| TRINITY_DN18377_c0_g1_i1 | dmso | control | -0,5068795 | 5,1020856  | 0,00068544 | 0,0054075  |
| TRINITY_DN2541_c0_g1_i1  | dmso | control | -0,5069956 | 6,5069304  | 1,29E-05   | 0,00017583 |
| TRINITY_DN18729_c0_g1_i1 | dmso | control | -0,5077111 | 6,38606352 | 5,57E-05   | 0,00063256 |
| TRINITY_DN13152_c0_g1_i1 | dmso | control | -0,5095565 | 3,01173182 | 0,01627263 | 0,0675843  |
| TRINITY_DN8568_c0_g1_i1  | dmso | control | -0,5105493 | 3,24005029 | 0,01215219 | 0,05414507 |
| TRINITY_DN11698_c0_g1_i1 | dmso | control | -0,5109014 | 3,53250443 | 0,01090149 | 0,04978565 |
| TRINITY_DN12953_c0_g1_i1 | dmso | control | -0,5109571 | 4,43982916 | 0,00155751 | 0,01070325 |
| TRINITY_DN11970_c0_g1_i1 | dmso | control | -0,5111018 | 5,69220261 | 8,53E-05   | 0,00091079 |
| TRINITY_DN163_c0_g1_i1   | dmso | control | -0,5115737 | 9,00294322 | 1,68E-05   | 0,00021944 |
| TRINITY_DN35954_c0_g1_i1 | dmso | control | -0,5119734 | 4,77197431 | 0,00231708 | 0,01466703 |
| TRINITY_DN1284_c0_g1_i1  | dmso | control | -0,5129144 | 3,60533277 | 0,00677826 | 0,0341633  |
| TRINITY_DN19505_c0_g1_i1 | dmso | control | -0,5130632 | 7,24343598 | 2,83E-05   | 0,00034752 |
| TRINITY_DN22717_c0_g1_i1 | dmso | control | -0,5132124 | 3,96699449 | 0,00738974 | 0,03666945 |
| TRINITY_DN4961_c0_g1_i1  | dmso | control | -0,5137549 | 8,42837952 | 0,00015203 | 0,00149394 |
| TRINITY_DN2429_c0_g1_i1  | dmso | control | -0,513836  | 5,19718623 | 0,00034778 | 0,00303727 |

|                          |      |         |            |            |            |            |
|--------------------------|------|---------|------------|------------|------------|------------|
| TRINITY_DN1399_c0_g1_i1  | dmso | control | -0,5143451 | 5,29803736 | 0,00088361 | 0,00668053 |
| TRINITY_DN19857_c0_g1_i1 | dmso | control | -0,5145427 | 3,85087163 | 0,00961603 | 0,04505467 |
| TRINITY_DN24861_c0_g1_i1 | dmso | control | -0,514882  | 3,02990332 | 0,02023928 | 0,07996618 |
| TRINITY_DN6663_c0_g1_i1  | dmso | control | -0,5148982 | 5,6450114  | 9,85E-05   | 0,00103096 |
| TRINITY_DN1666_c0_g1_i1  | dmso | control | -0,5150987 | 4,07297153 | 0,00294801 | 0,01785919 |
| TRINITY_DN47_c0_g1_i1    | dmso | control | -0,5153316 | 10,217445  | 1,21E-06   | 2,09E-05   |
| TRINITY_DN2049_c0_g1_i1  | dmso | control | -0,516586  | 4,85777554 | 0,00090036 | 0,00676678 |
| TRINITY_DN6454_c0_g1_i1  | dmso | control | -0,5171027 | 2,59020369 | 0,02679614 | 0,09856641 |
| TRINITY_DN21158_c0_g1_i1 | dmso | control | -0,5184899 | 5,3644314  | 0,00016289 | 0,00158174 |
| TRINITY_DN1755_c0_g1_i1  | dmso | control | -0,5190306 | 3,70085572 | 0,00861998 | 0,04133147 |
| TRINITY_DN8793_c0_g1_i1  | dmso | control | -0,5195961 | 3,11359543 | 0,01276403 | 0,05636698 |
| TRINITY_DN13020_c0_g1_i1 | dmso | control | -0,5196607 | 3,32119086 | 0,00902842 | 0,04278724 |
| TRINITY_DN11479_c0_g1_i1 | dmso | control | -0,5206162 | 5,18203828 | 0,00021669 | 0,00201808 |
| TRINITY_DN7271_c0_g1_i1  | dmso | control | -0,5207921 | 5,70526207 | 0,00012433 | 0,00125939 |
| TRINITY_DN10796_c0_g1_i1 | dmso | control | -0,5216463 | 4,16183412 | 0,0033629  | 0,01981901 |
| TRINITY_DN6480_c0_g1_i1  | dmso | control | -0,5239413 | 5,27754522 | 0,00041375 | 0,00352184 |
| TRINITY_DN22379_c0_g1_i1 | dmso | control | -0,5242215 | 3,953422   | 0,00992539 | 0,0461895  |
| TRINITY_DN11336_c0_g1_i1 | dmso | control | -0,5244038 | 3,80518047 | 0,00796775 | 0,03893579 |
| TRINITY_DN18828_c0_g1_i1 | dmso | control | -0,5250365 | 7,7708464  | 0,00091929 | 0,00688036 |
| TRINITY_DN6605_c0_g1_i1  | dmso | control | -0,525147  | 3,59502979 | 0,00600536 | 0,03114809 |
| TRINITY_DN23145_c0_g1_i1 | dmso | control | -0,5253568 | 3,39149603 | 0,0085355  | 0,04101638 |
| TRINITY_DN38319_c0_g1_i1 | dmso | control | -0,5255289 | 3,13574272 | 0,0150428  | 0,06351747 |
| TRINITY_DN18931_c0_g1_i1 | dmso | control | -0,5261984 | 6,3368712  | 1,91E-05   | 0,00024651 |
| TRINITY_DN5528_c0_g1_i1  | dmso | control | -0,5274103 | 5,53839309 | 9,02E-05   | 0,00095496 |
| TRINITY_DN2705_c0_g1_i1  | dmso | control | -0,5278139 | 3,86074132 | 0,00472826 | 0,0258613  |
| TRINITY_DN726_c0_g1_i1   | dmso | control | -0,5280497 | 6,25451109 | 1,60E-05   | 0,0002112  |
| TRINITY_DN14551_c0_g1_i1 | dmso | control | -0,5281768 | 4,05310922 | 0,00333775 | 0,01970678 |
| TRINITY_DN148_c0_g1_i1   | dmso | control | -0,5284926 | 4,96673779 | 0,00048133 | 0,00400507 |
| TRINITY_DN7193_c0_g1_i1  | dmso | control | -0,5285177 | 3,99765611 | 0,00374219 | 0,02153625 |
| TRINITY_DN33275_c0_g1_i1 | dmso | control | -0,5286809 | 3,77856138 | 0,00380711 | 0,02179693 |
| TRINITY_DN2091_c0_g1_i1  | dmso | control | -0,5292613 | 4,97850487 | 0,00026175 | 0,00238099 |

|                          |      |         |            |            |            |            |
|--------------------------|------|---------|------------|------------|------------|------------|
| TRINITY_DN10629_c0_g1_i1 | dmso | control | -0,5304608 | 3,43582678 | 0,00663926 | 0,03364741 |
| TRINITY_DN2080_c0_g1_i1  | dmso | control | -0,5306328 | 4,27980367 | 0,00319311 | 0,01908335 |
| TRINITY_DN17851_c0_g1_i1 | dmso | control | -0,5309343 | 5,54042684 | 0,00326741 | 0,01943096 |
| TRINITY_DN5880_c0_g1_i1  | dmso | control | -0,5313792 | 3,89376536 | 0,0032806  | 0,01947733 |
| TRINITY_DN11506_c0_g1_i1 | dmso | control | -0,5318498 | 3,08761459 | 0,01082219 | 0,0494861  |
| TRINITY_DN18869_c0_g1_i1 | dmso | control | -0,5327191 | 6,13969774 | 2,32E-05   | 0,00029128 |
| TRINITY_DN23416_c0_g1_i1 | dmso | control | -0,5336547 | 7,06886613 | 2,70E-05   | 0,00033325 |
| TRINITY_DN43873_c0_g1_i1 | dmso | control | -0,5341018 | 3,21899926 | 0,01343158 | 0,05851002 |
| TRINITY_DN12163_c0_g1_i1 | dmso | control | -0,534181  | 4,99046537 | 0,00024384 | 0,00223635 |
| TRINITY_DN32381_c0_g1_i1 | dmso | control | -0,5349651 | 3,57010111 | 0,00921178 | 0,04349923 |
| TRINITY_DN7776_c0_g1_i1  | dmso | control | -0,5351149 | 3,34663126 | 0,00629902 | 0,03230719 |
| TRINITY_DN28696_c0_g1_i1 | dmso | control | -0,5357935 | 3,87450386 | 0,00314508 | 0,01883851 |
| TRINITY_DN12349_c0_g1_i1 | dmso | control | -0,5360301 | 4,73423962 | 0,00056941 | 0,00462863 |
| TRINITY_DN19325_c0_g1_i1 | dmso | control | -0,5366644 | 4,03208887 | 0,00442806 | 0,02459183 |
| TRINITY_DN12436_c0_g1_i1 | dmso | control | -0,5367938 | 4,38057981 | 0,0096972  | 0,0453614  |
| TRINITY_DN12799_c0_g1_i1 | dmso | control | -0,5368838 | 4,08967374 | 0,00268804 | 0,01653454 |
| TRINITY_DN20507_c0_g1_i1 | dmso | control | -0,5375229 | 4,15415509 | 0,00967623 | 0,04529264 |
| TRINITY_DN33926_c0_g1_i1 | dmso | control | -0,5376187 | 3,70057648 | 0,00401047 | 0,02273599 |
| TRINITY_DN25550_c0_g1_i1 | dmso | control | -0,538447  | 2,71727572 | 0,01896909 | 0,07603869 |
| TRINITY_DN24099_c0_g1_i1 | dmso | control | -0,5387393 | 2,81286985 | 0,01558594 | 0,06520098 |
| TRINITY_DN6549_c0_g1_i1  | dmso | control | -0,5387607 | 5,84634381 | 0,00122544 | 0,00880232 |
| TRINITY_DN1412_c0_g1_i1  | dmso | control | -0,5401007 | 3,65659645 | 0,00587435 | 0,03060042 |
| TRINITY_DN13429_c0_g1_i1 | dmso | control | -0,5407263 | 3,79123918 | 0,01144508 | 0,05169613 |
| TRINITY_DN23217_c0_g1_i1 | dmso | control | -0,541457  | 4,27623671 | 0,00178758 | 0,01197107 |
| TRINITY_DN16094_c0_g1_i1 | dmso | control | -0,5423552 | 4,30250723 | 0,0012585  | 0,00900398 |
| TRINITY_DN1328_c0_g1_i1  | dmso | control | -0,5424589 | 6,41110605 | 6,98E-06   | 0,00010107 |
| TRINITY_DN4559_c0_g1_i1  | dmso | control | -0,5432981 | 6,42525742 | 6,73E-05   | 0,00074422 |
| TRINITY_DN20107_c0_g1_i1 | dmso | control | -0,5433417 | 3,69439964 | 0,00363985 | 0,02110703 |
| TRINITY_DN10842_c0_g1_i1 | dmso | control | -0,5439012 | 4,60613169 | 0,00058763 | 0,0047474  |
| TRINITY_DN5683_c0_g1_i1  | dmso | control | -0,5449289 | 5,25060054 | 9,85E-05   | 0,00103096 |
| TRINITY_DN1778_c0_g1_i1  | dmso | control | -0,5462447 | 4,41627527 | 0,00068258 | 0,00539226 |

|                          |      |         |            |            |            |            |
|--------------------------|------|---------|------------|------------|------------|------------|
| TRINITY_DN13603_c0_g1_i1 | dmso | control | -0,5480946 | 3,41040896 | 0,00847076 | 0,04082754 |
| TRINITY_DN5057_c0_g1_i1  | dmso | control | -0,5487519 | 4,13566715 | 0,00171588 | 0,01158757 |
| TRINITY_DN6840_c0_g1_i1  | dmso | control | -0,5490058 | 5,12388316 | 0,00014648 | 0,00144826 |
| TRINITY_DN23018_c0_g1_i1 | dmso | control | -0,5494105 | 4,31637668 | 0,0012932  | 0,00922024 |
| TRINITY_DN8044_c0_g1_i1  | dmso | control | -0,5498468 | 4,1116804  | 0,00155246 | 0,01068382 |
| TRINITY_DN10784_c0_g1_i1 | dmso | control | -0,5501512 | 3,20377383 | 0,01900503 | 0,07615192 |
| TRINITY_DN932_c0_g1_i1   | dmso | control | -0,5502569 | 5,01070365 | 0,00016612 | 0,00160938 |
| TRINITY_DN20904_c0_g1_i1 | dmso | control | -0,551357  | 3,96250236 | 0,00217793 | 0,01400099 |
| TRINITY_DN7941_c0_g1_i1  | dmso | control | -0,5519512 | 4,10309723 | 0,00175876 | 0,01181639 |
| TRINITY_DN8381_c0_g1_i1  | dmso | control | -0,5523291 | 2,89216698 | 0,01171229 | 0,05254161 |
| TRINITY_DN19628_c0_g1_i1 | dmso | control | -0,5523355 | 4,42540525 | 0,00110642 | 0,00806775 |
| TRINITY_DN26022_c0_g1_i1 | dmso | control | -0,5523692 | 2,62479977 | 0,01862725 | 0,07501273 |
| TRINITY_DN5945_c0_g1_i1  | dmso | control | -0,5543673 | 4,85186129 | 0,00069097 | 0,00543924 |
| TRINITY_DN15096_c0_g1_i1 | dmso | control | -0,5544432 | 3,10352723 | 0,00845541 | 0,04078079 |
| TRINITY_DN11153_c0_g1_i1 | dmso | control | -0,5551814 | 3,74929115 | 0,00298863 | 0,01803289 |
| TRINITY_DN7131_c0_g1_i1  | dmso | control | -0,555376  | 3,37147355 | 0,00423021 | 0,0236751  |
| TRINITY_DN4626_c0_g1_i1  | dmso | control | -0,5554102 | 6,46621612 | 0,00032127 | 0,00284887 |
| TRINITY_DN21136_c0_g1_i1 | dmso | control | -0,5555947 | 2,57645061 | 0,02048821 | 0,08062309 |
| TRINITY_DN34241_c0_g1_i1 | dmso | control | -0,556088  | 8,53593565 | 6,74E-05   | 0,00074439 |
| TRINITY_DN25973_c0_g1_i1 | dmso | control | -0,5564783 | 2,87062006 | 0,02036897 | 0,08028099 |
| TRINITY_DN5422_c0_g1_i1  | dmso | control | -0,5576281 | 7,18138658 | 3,36E-06   | 5,17E-05   |
| TRINITY_DN15550_c0_g1_i1 | dmso | control | -0,5577208 | 3,53697281 | 0,00376803 | 0,02165044 |
| TRINITY_DN5523_c0_g1_i1  | dmso | control | -0,5582207 | 3,91847691 | 0,00709423 | 0,03547114 |
| TRINITY_DN12134_c0_g1_i1 | dmso | control | -0,558661  | 3,78213176 | 0,00229066 | 0,01455085 |
| TRINITY_DN16367_c0_g1_i1 | dmso | control | -0,5588195 | 5,15955455 | 0,00016185 | 0,00157688 |
| TRINITY_DN9968_c0_g1_i1  | dmso | control | -0,5589417 | 5,25268162 | 0,0030681  | 0,01845495 |
| TRINITY_DN18736_c0_g1_i1 | dmso | control | -0,5591727 | 4,01338087 | 0,00354696 | 0,02069302 |
| TRINITY_DN13646_c0_g1_i1 | dmso | control | -0,5592823 | 4,17188934 | 0,00833735 | 0,04031906 |
| TRINITY_DN6326_c0_g1_i1  | dmso | control | -0,5594908 | 2,89043041 | 0,01097482 | 0,05000985 |
| TRINITY_DN2320_c0_g1_i1  | dmso | control | -0,5601181 | 4,19872372 | 0,0010994  | 0,00803281 |
| TRINITY_DN12091_c0_g1_i1 | dmso | control | -0,5604328 | 3,46125383 | 0,00715986 | 0,03573747 |



|                          |      |         |            |            |            |            |
|--------------------------|------|---------|------------|------------|------------|------------|
| TRINITY_DN20579_c0_g1_i1 | dmso | control | -0,561301  | 2,92750501 | 0,01834589 | 0,07412765 |
| TRINITY_DN1080_c0_g1_i1  | dmso | control | -0,5619528 | 6,61822169 | 2,69E-06   | 4,27E-05   |
| TRINITY_DN11987_c0_g1_i1 | dmso | control | -0,5622628 | 2,75930102 | 0,02103557 | 0,08232427 |
| TRINITY_DN9842_c0_g1_i1  | dmso | control | -0,5623594 | 2,47650114 | 0,01855488 | 0,07478382 |
| TRINITY_DN6711_c0_g1_i1  | dmso | control | -0,5625121 | 3,04042162 | 0,0120208  | 0,05367558 |
| TRINITY_DN33304_c0_g1_i1 | dmso | control | -0,5632694 | 3,71395448 | 0,00359002 | 0,02086836 |
| TRINITY_DN1752_c0_g1_i1  | dmso | control | -0,5635024 | 5,33932303 | 4,64E-05   | 0,00053615 |
| TRINITY_DN11590_c0_g1_i1 | dmso | control | -0,5635684 | 8,19213129 | 2,38E-05   | 0,00029843 |
| TRINITY_DN2155_c0_g1_i1  | dmso | control | -0,5646278 | 6,07341209 | 1,57E-05   | 0,00020691 |
| TRINITY_DN20131_c0_g1_i1 | dmso | control | -0,5652849 | 3,51206237 | 0,00543769 | 0,02883533 |
| TRINITY_DN8881_c0_g1_i1  | dmso | control | -0,5656713 | 2,40125516 | 0,02169763 | 0,08416279 |
| TRINITY_DN27371_c0_g1_i1 | dmso | control | -0,5657559 | 5,03974305 | 0,00013114 | 0,00131676 |
| TRINITY_DN22060_c0_g1_i1 | dmso | control | -0,569318  | 5,19907461 | 0,00033194 | 0,00292904 |
| TRINITY_DN25507_c0_g1_i1 | dmso | control | -0,5695714 | 4,41500397 | 0,00791862 | 0,0387219  |
| TRINITY_DN6990_c0_g1_i1  | dmso | control | -0,569653  | 3,74499569 | 0,0023929  | 0,01509407 |
| TRINITY_DN19680_c0_g1_i1 | dmso | control | -0,5700063 | 5,14075595 | 7,66E-05   | 0,00083084 |
| TRINITY_DN48566_c0_g1_i1 | dmso | control | -0,5700303 | 3,00967286 | 0,01470933 | 0,06238292 |
| TRINITY_DN18852_c0_g1_i1 | dmso | control | -0,5702871 | 5,0191155  | 0,00022597 | 0,00209775 |
| TRINITY_DN4708_c0_g1_i1  | dmso | control | -0,5705324 | 5,63100482 | 0,0001914  | 0,00181531 |
| TRINITY_DN14236_c0_g1_i1 | dmso | control | -0,5722987 | 3,16733282 | 0,01757301 | 0,07180179 |
| TRINITY_DN122_c0_g1_i1   | dmso | control | -0,5725432 | 7,14179912 | 9,53E-07   | 1,67E-05   |
| TRINITY_DN14642_c0_g1_i1 | dmso | control | -0,5725872 | 5,30128853 | 5,79E-05   | 0,00065474 |
| TRINITY_DN4713_c0_g1_i1  | dmso | control | -0,5726217 | 5,07322213 | 0,00088548 | 0,00668973 |
| TRINITY_DN18654_c0_g1_i1 | dmso | control | -0,5731011 | 5,09985505 | 0,00333584 | 0,01970678 |
| TRINITY_DN10614_c0_g1_i1 | dmso | control | -0,5739898 | 2,54746292 | 0,01789155 | 0,07273948 |
| TRINITY_DN637_c0_g1_i1   | dmso | control | -0,5742993 | 6,96219713 | 7,82E-07   | 1,41E-05   |
| TRINITY_DN11482_c0_g1_i1 | dmso | control | -0,5743195 | 2,92347217 | 0,0106575  | 0,04885674 |
| TRINITY_DN7130_c0_g1_i1  | dmso | control | -0,5744266 | 2,62104037 | 0,01252668 | 0,05559547 |
| TRINITY_DN2270_c0_g1_i1  | dmso | control | -0,5748254 | 3,34289123 | 0,00329736 | 0,01953664 |
| TRINITY_DN14675_c0_g1_i1 | dmso | control | -0,5749008 | 2,1278509  | 0,02659319 | 0,09804458 |
| TRINITY_DN12092_c0_g1_i1 | dmso | control | -0,5749826 | 4,02940625 | 0,00463959 | 0,02549226 |

|                          |      |         |            |            |            |            |
|--------------------------|------|---------|------------|------------|------------|------------|
| TRINITY_DN83_c0_g1_i1    | dmso | control | -0,5759902 | 11,2944398 | 1,47E-07   | 3,15E-06   |
| TRINITY_DN35351_c0_g1_i1 | dmso | control | -0,5771837 | 6,00433191 | 2,03E-05   | 0,0002594  |
| TRINITY_DN1543_c0_g1_i1  | dmso | control | -0,5774391 | 3,75958786 | 0,00183731 | 0,01223036 |
| TRINITY_DN24277_c0_g1_i1 | dmso | control | -0,5778177 | 5,21732935 | 0,00014073 | 0,00140098 |
| TRINITY_DN14451_c0_g1_i1 | dmso | control | -0,577868  | 3,55029989 | 0,00480323 | 0,02615253 |
| TRINITY_DN5647_c0_g1_i1  | dmso | control | -0,5779905 | 4,89933315 | 0,00011224 | 0,00115557 |
| TRINITY_DN11436_c0_g1_i1 | dmso | control | -0,5782132 | 4,31746774 | 0,00054208 | 0,00443643 |
| TRINITY_DN7072_c0_g1_i1  | dmso | control | -0,5798553 | 2,6402818  | 0,01100132 | 0,05009902 |
| TRINITY_DN20761_c0_g1_i1 | dmso | control | -0,5801027 | 6,17331883 | 5,68E-06   | 8,36E-05   |
| TRINITY_DN6945_c0_g1_i1  | dmso | control | -0,5803961 | 3,87569204 | 0,00118378 | 0,00853278 |
| TRINITY_DN18584_c0_g1_i1 | dmso | control | -0,5817174 | 4,66767846 | 0,00029024 | 0,00260565 |
| TRINITY_DN12978_c0_g1_i1 | dmso | control | -0,5821775 | 4,03690259 | 0,00095306 | 0,007086   |
| TRINITY_DN11666_c0_g1_i1 | dmso | control | -0,5828093 | 5,82807759 | 5,37E-06   | 7,95E-05   |
| TRINITY_DN5808_c0_g1_i1  | dmso | control | -0,5830209 | 6,47973574 | 8,58E-06   | 0,00012147 |
| TRINITY_DN16681_c0_g1_i1 | dmso | control | -0,5834253 | 3,70121987 | 0,00157583 | 0,01081248 |
| TRINITY_DN31431_c0_g1_i1 | dmso | control | -0,5843118 | 3,84299995 | 0,00184749 | 0,01229246 |
| TRINITY_DN1370_c0_g1_i1  | dmso | control | -0,5853358 | 3,20480592 | 0,0077645  | 0,03807138 |
| TRINITY_DN33201_c0_g1_i1 | dmso | control | -0,585483  | 4,28059066 | 0,00079412 | 0,00612481 |
| TRINITY_DN13725_c0_g1_i1 | dmso | control | -0,5861391 | 2,65892329 | 0,01420766 | 0,06075479 |
| TRINITY_DN26308_c0_g1_i1 | dmso | control | -0,5870755 | 2,49693733 | 0,01602781 | 0,06681723 |
| TRINITY_DN12049_c0_g1_i1 | dmso | control | -0,5874889 | 2,95030379 | 0,00743347 | 0,03679798 |
| TRINITY_DN19373_c0_g1_i1 | dmso | control | -0,5889595 | 5,10479051 | 0,00012001 | 0,00122252 |
| TRINITY_DN15940_c0_g1_i1 | dmso | control | -0,5890498 | 3,40328419 | 0,01387102 | 0,05970073 |
| TRINITY_DN18778_c0_g1_i1 | dmso | control | -0,5902082 | 5,68604933 | 7,15E-06   | 0,00010336 |
| TRINITY_DN25402_c0_g1_i1 | dmso | control | -0,5903521 | 3,10684787 | 0,00764959 | 0,03764851 |
| TRINITY_DN20668_c0_g1_i1 | dmso | control | -0,590608  | 5,91871045 | 2,17E-05   | 0,00027486 |
| TRINITY_DN7925_c0_g1_i1  | dmso | control | -0,5906285 | 2,78572559 | 0,00866675 | 0,04150901 |
| TRINITY_DN20495_c0_g1_i1 | dmso | control | -0,5907471 | 3,64495503 | 0,00241063 | 0,0151728  |
| TRINITY_DN23158_c0_g1_i1 | dmso | control | -0,591023  | 2,63882785 | 0,02020312 | 0,07986701 |
| TRINITY_DN78125_c0_g1_i1 | dmso | control | -0,5920212 | 2,5438361  | 0,0163459  | 0,06775221 |
| TRINITY_DN19156_c0_g1_i1 | dmso | control | -0,5921963 | 4,11670642 | 0,00086489 | 0,00657118 |

|                          |      |         |            |            |            |            |
|--------------------------|------|---------|------------|------------|------------|------------|
| TRINITY_DN20706_c0_g1_i1 | dmso | control | -0,5923132 | 3,72382866 | 0,00142633 | 0,00995328 |
| TRINITY_DN606_c0_g1_i1   | dmso | control | -0,5925436 | 7,25532891 | 9,80E-07   | 1,71E-05   |
| TRINITY_DN45971_c0_g1_i1 | dmso | control | -0,5931398 | 3,56494717 | 0,00433291 | 0,02413764 |
| TRINITY_DN18171_c0_g1_i1 | dmso | control | -0,5939227 | 2,75774735 | 0,0091682  | 0,04332175 |
| TRINITY_DN8088_c0_g1_i1  | dmso | control | -0,5945852 | 3,37083392 | 0,00208632 | 0,01353025 |
| TRINITY_DN11911_c0_g1_i1 | dmso | control | -0,5950893 | 5,41572654 | 1,32E-05   | 0,00017926 |
| TRINITY_DN12961_c0_g1_i1 | dmso | control | -0,5954617 | 2,96832962 | 0,00744991 | 0,03684148 |
| TRINITY_DN12507_c0_g1_i1 | dmso | control | -0,5956544 | 8,42190424 | 0,0004641  | 0,00389311 |
| TRINITY_DN22562_c0_g1_i1 | dmso | control | -0,5957577 | 2,47722779 | 0,02194282 | 0,0847951  |
| TRINITY_DN19281_c0_g1_i1 | dmso | control | -0,5957835 | 3,81677382 | 0,00192994 | 0,01270065 |
| TRINITY_DN18667_c0_g1_i1 | dmso | control | -0,5964346 | 8,55915069 | 0,00017481 | 0,00168005 |
| TRINITY_DN2121_c0_g1_i1  | dmso | control | -0,5975008 | 4,42439306 | 0,00093169 | 0,00695161 |
| TRINITY_DN14821_c0_g1_i1 | dmso | control | -0,5976903 | 3,11010938 | 0,00392704 | 0,02236832 |
| TRINITY_DN37519_c0_g1_i1 | dmso | control | -0,5983802 | 5,77081667 | 2,06E-05   | 0,00026343 |
| TRINITY_DN568_c0_g1_i1   | dmso | control | -0,598551  | 7,82577569 | 1,65E-07   | 3,46E-06   |
| TRINITY_DN20884_c0_g1_i1 | dmso | control | -0,5996685 | 2,85924374 | 0,01120159 | 0,0508028  |
| TRINITY_DN12746_c0_g1_i1 | dmso | control | -0,6001014 | 5,25554402 | 0,00017915 | 0,00171831 |
| TRINITY_DN11598_c0_g1_i1 | dmso | control | -0,6002863 | 6,16570427 | 1,18E-05   | 0,00016214 |
| TRINITY_DN19056_c0_g1_i1 | dmso | control | -0,600846  | 5,05303605 | 5,00E-05   | 0,00057382 |
| TRINITY_DN25082_c0_g1_i1 | dmso | control | -0,6017603 | 4,3334742  | 0,00025408 | 0,00231849 |
| TRINITY_DN4788_c0_g1_i1  | dmso | control | -0,6017683 | 3,97119204 | 0,00070326 | 0,00552098 |
| TRINITY_DN20217_c0_g1_i1 | dmso | control | -0,6024083 | 5,24568291 | 2,34E-05   | 0,00029389 |
| TRINITY_DN1213_c0_g1_i1  | dmso | control | -0,6025074 | 3,14249067 | 0,00289652 | 0,01757991 |
| TRINITY_DN8624_c0_g1_i1  | dmso | control | -0,602659  | 3,85319333 | 0,00115196 | 0,00833255 |
| TRINITY_DN1482_c0_g1_i1  | dmso | control | -0,6037233 | 5,16108001 | 2,12E-05   | 0,00026899 |
| TRINITY_DN49997_c0_g1_i1 | dmso | control | -0,6039864 | 3,45670285 | 0,00660572 | 0,03350411 |
| TRINITY_DN21555_c0_g1_i1 | dmso | control | -0,6048039 | 2,83992051 | 0,01275356 | 0,05635519 |
| TRINITY_DN4991_c0_g1_i1  | dmso | control | -0,605489  | 8,13797576 | 1,03E-07   | 2,29E-06   |
| TRINITY_DN33110_c0_g1_i1 | dmso | control | -0,6073962 | 2,11240599 | 0,01891892 | 0,07593327 |
| TRINITY_DN17673_c0_g1_i1 | dmso | control | -0,6078905 | 6,54804507 | 1,38E-07   | 2,96E-06   |
| TRINITY_DN12546_c0_g1_i1 | dmso | control | -0,6080498 | 3,68080371 | 0,0022378  | 0,01429675 |

|                          |      |         |            |            |            |            |
|--------------------------|------|---------|------------|------------|------------|------------|
| TRINITY_DN24544_c0_g1_i1 | dmso | control | -0,6081191 | 2,49180194 | 0,01107763 | 0,05034699 |
| TRINITY_DN10707_c0_g1_i1 | dmso | control | -0,60893   | 8,61656773 | 3,10E-08   | 7,43E-07   |
| TRINITY_DN20481_c0_g1_i1 | dmso | control | -0,6098241 | 5,86489461 | 3,18E-05   | 0,00038435 |
| TRINITY_DN11943_c0_g1_i1 | dmso | control | -0,60994   | 3,84118923 | 0,00080983 | 0,00622568 |
| TRINITY_DN648_c0_g1_i1   | dmso | control | -0,6100362 | 6,95517007 | 3,43E-07   | 6,67E-06   |
| TRINITY_DN12508_c0_g1_i1 | dmso | control | -0,6114699 | 3,02177361 | 0,00332255 | 0,01965368 |
| TRINITY_DN20142_c0_g1_i1 | dmso | control | -0,6123867 | 1,98800753 | 0,02004234 | 0,07936174 |
| TRINITY_DN4965_c0_g1_i1  | dmso | control | -0,6124683 | 7,02556756 | 8,57E-08   | 1,91E-06   |
| TRINITY_DN877_c0_g1_i1   | dmso | control | -0,612919  | 5,38762729 | 1,34E-05   | 0,0001807  |
| TRINITY_DN7456_c0_g1_i1  | dmso | control | -0,6129592 | 4,11366146 | 0,00037227 | 0,00321642 |
| TRINITY_DN19262_c0_g1_i1 | dmso | control | -0,6142513 | 3,62229577 | 0,00140172 | 0,00981    |
| TRINITY_DN40053_c0_g1_i1 | dmso | control | -0,6144594 | 2,2667202  | 0,01903693 | 0,07625453 |
| TRINITY_DN14885_c0_g1_i1 | dmso | control | -0,6150317 | 5,13838132 | 2,05E-05   | 0,00026232 |
| TRINITY_DN33468_c0_g1_i1 | dmso | control | -0,6155032 | 3,97303741 | 0,00045658 | 0,00383668 |
| TRINITY_DN33157_c0_g1_i1 | dmso | control | -0,6155648 | 4,67720942 | 0,0006975  | 0,00548171 |
| TRINITY_DN19805_c0_g1_i1 | dmso | control | -0,6178023 | 2,77675689 | 0,00792147 | 0,03872271 |
| TRINITY_DN11395_c0_g1_i1 | dmso | control | -0,6181601 | 5,53360774 | 4,81E-06   | 7,20E-05   |
| TRINITY_DN11179_c0_g1_i1 | dmso | control | -0,6189181 | 4,74266594 | 4,61E-05   | 0,00053346 |
| TRINITY_DN23318_c0_g1_i1 | dmso | control | -0,6192864 | 4,46087833 | 0,0001358  | 0,00136034 |
| TRINITY_DN198_c0_g1_i1   | dmso | control | -0,6205591 | 6,08128304 | 1,84E-06   | 3,03E-05   |
| TRINITY_DN35497_c0_g1_i1 | dmso | control | -0,6213118 | 3,00535445 | 0,0098557  | 0,04598102 |
| TRINITY_DN33912_c0_g1_i1 | dmso | control | -0,6213182 | 2,72438456 | 0,02270928 | 0,08703928 |
| TRINITY_DN47130_c0_g1_i1 | dmso | control | -0,6213741 | 4,59638858 | 0,00049855 | 0,0041246  |
| TRINITY_DN6278_c0_g1_i1  | dmso | control | -0,6213889 | 3,87029235 | 0,00068954 | 0,00543098 |
| TRINITY_DN11287_c0_g1_i1 | dmso | control | -0,6220264 | 4,17403973 | 0,00059929 | 0,00482808 |
| TRINITY_DN11889_c0_g1_i1 | dmso | control | -0,6226537 | 5,46743893 | 2,76E-06   | 4,36E-05   |
| TRINITY_DN18835_c0_g1_i1 | dmso | control | -0,6228495 | 6,08717729 | 1,58E-06   | 2,67E-05   |
| TRINITY_DN14989_c0_g1_i1 | dmso | control | -0,6243166 | 3,84761597 | 0,0005386  | 0,00441751 |
| TRINITY_DN78412_c0_g1_i1 | dmso | control | -0,624327  | 4,28493806 | 0,00072651 | 0,00567979 |
| TRINITY_DN744_c0_g1_i1   | dmso | control | -0,6243624 | 5,04957639 | 6,46E-05   | 0,00072028 |
| TRINITY_DN25215_c0_g1_i1 | dmso | control | -0,6254556 | 2,22142135 | 0,02043806 | 0,08048741 |

|                          |      |         |            |            |            |            |
|--------------------------|------|---------|------------|------------|------------|------------|
| TRINITY_DN32415_c0_g1_i1 | dmso | control | -0,6256091 | 4,06337156 | 0,00975575 | 0,04559103 |
| TRINITY_DN2188_c0_g1_i1  | dmso | control | -0,6260153 | 4,52412056 | 0,00045914 | 0,00385378 |
| TRINITY_DN30524_c0_g1_i1 | dmso | control | -0,6260162 | 1,77268447 | 0,02197348 | 0,08486814 |
| TRINITY_DN12231_c0_g1_i1 | dmso | control | -0,6267559 | 6,40078787 | 3,52E-07   | 6,82E-06   |
| TRINITY_DN8017_c0_g1_i1  | dmso | control | -0,6293664 | 5,94308534 | 4,79E-07   | 9,01E-06   |
| TRINITY_DN12981_c0_g1_i1 | dmso | control | -0,6293743 | 3,19200681 | 0,0018746  | 0,01241566 |
| TRINITY_DN7197_c0_g1_i1  | dmso | control | -0,6308443 | 3,56951474 | 0,00357243 | 0,02079959 |
| TRINITY_DN19902_c0_g1_i1 | dmso | control | -0,6318327 | 6,0907801  | 5,26E-06   | 7,82E-05   |
| TRINITY_DN33498_c0_g1_i1 | dmso | control | -0,6332885 | 3,01306766 | 0,0025248  | 0,01575407 |
| TRINITY_DN13222_c0_g1_i1 | dmso | control | -0,6332899 | 3,25072393 | 0,00146158 | 0,01016488 |
| TRINITY_DN23805_c0_g1_i1 | dmso | control | -0,6334642 | 3,63051223 | 0,00097055 | 0,00719323 |
| TRINITY_DN1205_c0_g1_i1  | dmso | control | -0,6348812 | 5,70505166 | 3,87E-06   | 5,86E-05   |
| TRINITY_DN19972_c0_g1_i1 | dmso | control | -0,6348822 | 4,58670549 | 6,50E-05   | 0,00072342 |
| TRINITY_DN6582_c0_g1_i1  | dmso | control | -0,6363641 | 6,13960459 | 1,33E-07   | 2,89E-06   |
| TRINITY_DN3161_c0_g1_i1  | dmso | control | -0,6364856 | 2,80872981 | 0,00349912 | 0,02048834 |
| TRINITY_DN6706_c0_g1_i1  | dmso | control | -0,6365738 | 5,40245886 | 3,92E-05   | 0,00046341 |
| TRINITY_DN12107_c0_g1_i1 | dmso | control | -0,6370581 | 3,0972187  | 0,00206904 | 0,01344459 |
| TRINITY_DN4691_c0_g1_i1  | dmso | control | -0,6377345 | 6,68806522 | 1,07E-06   | 1,86E-05   |
| TRINITY_DN20860_c0_g1_i1 | dmso | control | -0,6379537 | 2,44513658 | 0,00816646 | 0,03969197 |
| TRINITY_DN8170_c0_g1_i1  | dmso | control | -0,6382137 | 2,68327172 | 0,00458403 | 0,02528305 |
| TRINITY_DN2112_c0_g1_i1  | dmso | control | -0,6383815 | 2,24724867 | 0,01004886 | 0,04659897 |
| TRINITY_DN9221_c0_g1_i1  | dmso | control | -0,6384868 | 3,80526191 | 0,001599   | 0,01094152 |
| TRINITY_DN19613_c0_g1_i1 | dmso | control | -0,6393729 | 2,21134688 | 0,01039078 | 0,04789806 |
| TRINITY_DN9773_c0_g1_i1  | dmso | control | -0,6399469 | 1,816099   | 0,02148397 | 0,08358092 |
| TRINITY_DN1710_c0_g1_i1  | dmso | control | -0,6409732 | 2,99622449 | 0,00434762 | 0,02419161 |
| TRINITY_DN39418_c0_g1_i1 | dmso | control | -0,64303   | 2,7779013  | 0,00443599 | 0,0246264  |
| TRINITY_DN22193_c0_g1_i1 | dmso | control | -0,6440618 | 3,17981485 | 0,0015779  | 0,01081248 |
| TRINITY_DN19511_c0_g1_i1 | dmso | control | -0,6442512 | 5,27763251 | 3,31E-06   | 5,11E-05   |
| TRINITY_DN36161_c0_g1_i1 | dmso | control | -0,6444118 | 2,72055047 | 0,0207208  | 0,08129058 |
| TRINITY_DN5857_c0_g1_i1  | dmso | control | -0,6463132 | 5,13247842 | 8,86E-06   | 0,000125   |
| TRINITY_DN8150_c0_g1_i1  | dmso | control | -0,6479032 | 2,48862806 | 0,00715959 | 0,03573747 |

|                          |      |         |            |            |            |            |
|--------------------------|------|---------|------------|------------|------------|------------|
| TRINITY_DN14943_c0_g1_i1 | dmso | control | -0,6483286 | 3,33754693 | 0,01075159 | 0,04922559 |
| TRINITY_DN8651_c0_g1_i1  | dmso | control | -0,6484111 | 5,84465507 | 2,21E-07   | 4,50E-06   |
| TRINITY_DN4366_c0_g1_i1  | dmso | control | -0,6486403 | 2,04113045 | 0,01530462 | 0,06435959 |
| TRINITY_DN25372_c0_g1_i1 | dmso | control | -0,6490298 | 1,79646386 | 0,01736442 | 0,07107654 |
| TRINITY_DN2126_c0_g1_i1  | dmso | control | -0,6533132 | 2,01971158 | 0,01795936 | 0,07291257 |
| TRINITY_DN34586_c0_g1_i1 | dmso | control | -0,6534062 | 1,99797923 | 0,01403499 | 0,06024211 |
| TRINITY_DN7799_c0_g1_i1  | dmso | control | -0,6535402 | 4,12774486 | 0,00018828 | 0,00179046 |
| TRINITY_DN32562_c0_g1_i1 | dmso | control | -0,6541004 | 2,31400264 | 0,00828131 | 0,04008832 |
| TRINITY_DN11916_c0_g1_i1 | dmso | control | -0,6543466 | 4,81118136 | 7,09E-05   | 0,00077955 |
| TRINITY_DN542_c0_g1_i1   | dmso | control | -0,6545727 | 8,16888447 | 0,0002766  | 0,00250031 |
| TRINITY_DN28164_c0_g1_i1 | dmso | control | -0,6555594 | 3,54308278 | 0,00360473 | 0,02093702 |
| TRINITY_DN32607_c0_g1_i1 | dmso | control | -0,6556874 | 4,50963105 | 3,50E-05   | 0,00041941 |
| TRINITY_DN32096_c0_g1_i1 | dmso | control | -0,6561867 | 3,67292495 | 0,00042329 | 0,00358831 |
| TRINITY_DN7689_c0_g1_i1  | dmso | control | -0,6576835 | 8,42662146 | 9,83E-05   | 0,00103082 |
| TRINITY_DN12505_c0_g1_i1 | dmso | control | -0,657868  | 2,58699483 | 0,004137   | 0,02326159 |
| TRINITY_DN10452_c0_g1_i1 | dmso | control | -0,6579987 | 3,81830114 | 0,00027081 | 0,00245438 |
| TRINITY_DN2464_c0_g1_i1  | dmso | control | -0,6581635 | 3,17522159 | 0,00158645 | 0,01086081 |
| TRINITY_DN24885_c0_g1_i1 | dmso | control | -0,6582083 | 2,61098054 | 0,00483281 | 0,02626408 |
| TRINITY_DN67588_c0_g1_i1 | dmso | control | -0,6583873 | 4,27882002 | 0,00216375 | 0,01394086 |
| TRINITY_DN59986_c0_g1_i1 | dmso | control | -0,6585211 | 3,10348435 | 0,00344267 | 0,02019877 |
| TRINITY_DN1070_c0_g1_i1  | dmso | control | -0,6588704 | 5,74310491 | 1,51E-06   | 2,56E-05   |
| TRINITY_DN23847_c0_g1_i1 | dmso | control | -0,659905  | 2,2841931  | 0,00956176 | 0,04484403 |
| TRINITY_DN14855_c0_g1_i1 | dmso | control | -0,6608787 | 4,38911239 | 0,00066609 | 0,00528953 |
| TRINITY_DN34397_c0_g1_i1 | dmso | control | -0,6628456 | 4,90163547 | 0,00010572 | 0,00109632 |
| TRINITY_DN27938_c0_g1_i1 | dmso | control | -0,6631901 | 2,00686639 | 0,01946235 | 0,07757549 |
| TRINITY_DN14144_c0_g1_i1 | dmso | control | -0,6634448 | 2,42950045 | 0,00930978 | 0,04389026 |
| TRINITY_DN19976_c0_g1_i1 | dmso | control | -0,6638643 | 2,26401637 | 0,00741876 | 0,03676296 |
| TRINITY_DN12105_c0_g1_i1 | dmso | control | -0,6642382 | 3,963277   | 0,0003391  | 0,00298494 |
| TRINITY_DN14006_c0_g1_i1 | dmso | control | -0,6644715 | 3,53667309 | 0,00079632 | 0,00613815 |
| TRINITY_DN4669_c0_g1_i1  | dmso | control | -0,6651976 | 6,04444593 | 7,53E-08   | 1,70E-06   |
| TRINITY_DN32504_c0_g1_i1 | dmso | control | -0,6676388 | 3,62872443 | 0,00069745 | 0,00548171 |

|                          |      |         |            |            |            |            |
|--------------------------|------|---------|------------|------------|------------|------------|
| TRINITY_DN90_c0_g1_i1    | dmso | control | -0,66806   | 11,4766834 | 1,04E-07   | 2,30E-06   |
| TRINITY_DN13389_c0_g1_i1 | dmso | control | -0,6684734 | 1,60200502 | 0,02451294 | 0,09204298 |
| TRINITY_DN8375_c0_g1_i1  | dmso | control | -0,6686252 | 5,12718647 | 0,00011276 | 0,00116005 |
| TRINITY_DN9528_c0_g1_i1  | dmso | control | -0,6686306 | 3,61320398 | 0,00240787 | 0,015162   |
| TRINITY_DN35080_c0_g1_i1 | dmso | control | -0,668638  | 1,62514495 | 0,01843887 | 0,07442008 |
| TRINITY_DN21869_c0_g1_i1 | dmso | control | -0,6689337 | 2,88092997 | 0,00204093 | 0,01329178 |
| TRINITY_DN42486_c0_g1_i1 | dmso | control | -0,6692923 | 2,15300184 | 0,01010161 | 0,04679851 |
| TRINITY_DN21740_c0_g1_i1 | dmso | control | -0,6700985 | 4,74806729 | 8,56E-05   | 0,00091368 |
| TRINITY_DN23563_c0_g1_i1 | dmso | control | -0,6702571 | 2,17818912 | 0,00867894 | 0,04154911 |
| TRINITY_DN8890_c0_g1_i1  | dmso | control | -0,6706949 | 2,05633635 | 0,01432084 | 0,061099   |
| TRINITY_DN3803_c0_g1_i1  | dmso | control | -0,6708933 | 3,85741316 | 0,00068755 | 0,00541823 |
| TRINITY_DN20091_c0_g1_i1 | dmso | control | -0,6728758 | 3,25497717 | 0,00108844 | 0,00795675 |
| TRINITY_DN2828_c0_g1_i1  | dmso | control | -0,6735671 | 3,68988208 | 0,00088637 | 0,00669296 |
| TRINITY_DN32502_c0_g1_i1 | dmso | control | -0,6740558 | 6,80371311 | 0,0001329  | 0,00133226 |
| TRINITY_DN5174_c0_g1_i1  | dmso | control | -0,674871  | 8,78898508 | 9,03E-08   | 2,01E-06   |
| TRINITY_DN19017_c0_g1_i1 | dmso | control | -0,6752395 | 6,06463427 | 3,69E-08   | 8,73E-07   |
| TRINITY_DN11896_c0_g1_i1 | dmso | control | -0,6761123 | 5,68650111 | 1,93E-07   | 4,00E-06   |
| TRINITY_DN401_c0_g1_i1   | dmso | control | -0,6762132 | 6,00669214 | 2,71E-06   | 4,30E-05   |
| TRINITY_DN12802_c0_g1_i1 | dmso | control | -0,6765019 | 5,47849607 | 1,12E-06   | 1,94E-05   |
| TRINITY_DN32489_c0_g1_i1 | dmso | control | -0,6765154 | 3,77189077 | 0,00025814 | 0,00234965 |
| TRINITY_DN4083_c0_g1_i1  | dmso | control | -0,6771323 | 4,97676412 | 4,07E-06   | 6,15E-05   |
| TRINITY_DN20293_c0_g1_i1 | dmso | control | -0,6771403 | 2,82672079 | 0,00173117 | 0,01166359 |
| TRINITY_DN3750_c0_g1_i1  | dmso | control | -0,6773308 | 1,98033993 | 0,01003498 | 0,04659445 |
| TRINITY_DN3270_c0_g1_i1  | dmso | control | -0,678828  | 1,80944679 | 0,0136132  | 0,05899869 |
| TRINITY_DN40527_c0_g1_i1 | dmso | control | -0,6801713 | 2,3793589  | 0,01602009 | 0,06680433 |
| TRINITY_DN4477_c0_g1_i1  | dmso | control | -0,6809941 | 7,71232411 | 1,05E-07   | 2,31E-06   |
| TRINITY_DN18798_c0_g1_i1 | dmso | control | -0,6826876 | 5,28115551 | 8,80E-07   | 1,56E-05   |
| TRINITY_DN8865_c0_g1_i1  | dmso | control | -0,6827489 | 3,58883904 | 0,00081381 | 0,00624959 |
| TRINITY_DN14462_c0_g1_i1 | dmso | control | -0,6829517 | 2,5557528  | 0,00395549 | 0,02249826 |
| TRINITY_DN20160_c0_g1_i1 | dmso | control | -0,6830114 | 1,96400676 | 0,01500163 | 0,06341776 |
| TRINITY_DN5245_c0_g1_i1  | dmso | control | -0,6831365 | 3,54945844 | 0,00043886 | 0,00369853 |

|                          |      |         |            |            |            |            |
|--------------------------|------|---------|------------|------------|------------|------------|
| TRINITY_DN18975_c0_g1_i1 | dmso | control | -0,6842578 | 5,00888378 | 2,19E-06   | 3,53E-05   |
| TRINITY_DN1022_c0_g1_i1  | dmso | control | -0,6844456 | 6,46500351 | 1,66E-08   | 4,19E-07   |
| TRINITY_DN15143_c0_g1_i1 | dmso | control | -0,684751  | 1,29004759 | 0,02541517 | 0,0946923  |
| TRINITY_DN11452_c0_g1_i1 | dmso | control | -0,6856226 | 5,0508629  | 3,64E-06   | 5,55E-05   |
| TRINITY_DN15151_c0_g1_i1 | dmso | control | -0,6860278 | 3,36456123 | 0,00087187 | 0,00660761 |
| TRINITY_DN660_c0_g1_i1   | dmso | control | -0,6861034 | 5,02287958 | 5,61E-06   | 8,27E-05   |
| TRINITY_DN4721_c0_g1_i1  | dmso | control | -0,6867809 | 11,746993  | 3,11E-09   | 8,86E-08   |
| TRINITY_DN13013_c0_g1_i1 | dmso | control | -0,6873695 | 4,29887427 | 0,00023227 | 0,00214799 |
| TRINITY_DN33355_c0_g1_i1 | dmso | control | -0,6879302 | 4,25024411 | 4,88E-05   | 0,00056199 |
| TRINITY_DN24216_c0_g1_i1 | dmso | control | -0,6880346 | 5,07071984 | 5,36E-06   | 7,93E-05   |
| TRINITY_DN17054_c0_g1_i1 | dmso | control | -0,6886713 | 2,68117312 | 0,00217177 | 0,01397385 |
| TRINITY_DN14489_c0_g1_i1 | dmso | control | -0,689926  | 3,06271378 | 0,01448376 | 0,06156534 |
| TRINITY_DN649_c0_g1_i1   | dmso | control | -0,6915116 | 6,7028216  | 1,46E-09   | 4,43E-08   |
| TRINITY_DN7349_c0_g1_i1  | dmso | control | -0,6928061 | 4,86529135 | 8,06E-05   | 0,00086866 |
| TRINITY_DN14625_c0_g1_i1 | dmso | control | -0,6929058 | 4,16096771 | 0,00017868 | 0,00171499 |
| TRINITY_DN19188_c0_g1_i1 | dmso | control | -0,6934204 | 2,9680505  | 0,00116003 | 0,00838669 |
| TRINITY_DN12770_c0_g1_i1 | dmso | control | -0,6938482 | 4,52986359 | 2,20E-05   | 0,00027712 |
| TRINITY_DN12999_c0_g1_i1 | dmso | control | -0,694307  | 5,3293104  | 1,07E-06   | 1,86E-05   |
| TRINITY_DN66147_c0_g1_i1 | dmso | control | -0,6948409 | 2,19154565 | 0,00853049 | 0,04101638 |
| TRINITY_DN5008_c0_g1_i1  | dmso | control | -0,6962066 | 5,32665113 | 8,93E-07   | 1,58E-05   |
| TRINITY_DN11098_c0_g1_i1 | dmso | control | -0,696339  | 5,79449179 | 1,63E-06   | 2,72E-05   |
| TRINITY_DN14194_c0_g1_i1 | dmso | control | -0,6963552 | 4,93286195 | 2,75E-06   | 4,36E-05   |
| TRINITY_DN20319_c0_g1_i1 | dmso | control | -0,696471  | 4,58007107 | 9,18E-06   | 0,00012899 |
| TRINITY_DN2925_c0_g1_i1  | dmso | control | -0,6974637 | 3,33838876 | 0,00090711 | 0,00680689 |
| TRINITY_DN34098_c0_g1_i1 | dmso | control | -0,697649  | 3,76480807 | 0,00020503 | 0,00192195 |
| TRINITY_DN34294_c0_g1_i1 | dmso | control | -0,6987557 | 3,84635883 | 0,0003105  | 0,00276519 |
| TRINITY_DN11047_c0_g1_i1 | dmso | control | -0,6995437 | 6,44979761 | 1,38E-08   | 3,56E-07   |
| TRINITY_DN21966_c0_g1_i1 | dmso | control | -0,700214  | 2,38771862 | 0,00577045 | 0,03020055 |
| TRINITY_DN32698_c0_g1_i1 | dmso | control | -0,7014956 | 3,63803446 | 0,00033393 | 0,00294482 |
| TRINITY_DN11292_c0_g1_i1 | dmso | control | -0,7026018 | 7,45702665 | 1,47E-05   | 0,00019693 |
| TRINITY_DN12449_c0_g1_i1 | dmso | control | -0,7030345 | 3,79192172 | 0,00086524 | 0,00657118 |



|                          |      |         |            |            |            |            |
|--------------------------|------|---------|------------|------------|------------|------------|
| TRINITY_DN66338_c0_g1_i1 | dmso | control | -0,7033389 | 4,25301041 | 0,00023209 | 0,00214771 |
| TRINITY_DN26519_c0_g1_i1 | dmso | control | -0,7033606 | 1,67019325 | 0,01831646 | 0,07405018 |
| TRINITY_DN31378_c0_g1_i1 | dmso | control | -0,7043555 | 4,39530122 | 0,00030803 | 0,0027449  |
| TRINITY_DN7251_c0_g1_i1  | dmso | control | -0,7047085 | 5,05589004 | 3,91E-06   | 5,92E-05   |
| TRINITY_DN5534_c0_g1_i1  | dmso | control | -0,705059  | 4,94623675 | 2,85E-06   | 4,48E-05   |
| TRINITY_DN5895_c0_g1_i1  | dmso | control | -0,7052323 | 6,11172566 | 3,06E-06   | 4,76E-05   |
| TRINITY_DN19254_c0_g1_i1 | dmso | control | -0,7085053 | 3,72322795 | 0,00011049 | 0,00114004 |
| TRINITY_DN3638_c0_g1_i1  | dmso | control | -0,7090751 | 3,97585753 | 6,87E-05   | 0,00075807 |
| TRINITY_DN9235_c0_g1_i1  | dmso | control | -0,7092936 | 4,32129666 | 5,03E-05   | 0,00057667 |
| TRINITY_DN28973_c0_g1_i1 | dmso | control | -0,7097318 | 1,12365613 | 0,02474969 | 0,09278726 |
| TRINITY_DN12745_c0_g1_i1 | dmso | control | -0,7100056 | 4,09622138 | 5,15E-05   | 0,00058839 |
| TRINITY_DN32725_c0_g1_i1 | dmso | control | -0,7133386 | 2,87887144 | 0,00136996 | 0,00963908 |
| TRINITY_DN2368_c0_g1_i1  | dmso | control | -0,7142592 | 2,26889411 | 0,00371661 | 0,02143172 |
| TRINITY_DN12942_c0_g1_i1 | dmso | control | -0,7148072 | 3,67608834 | 0,00087531 | 0,00662924 |
| TRINITY_DN16405_c0_g1_i1 | dmso | control | -0,7157358 | 1,11715954 | 0,02462638 | 0,09239691 |
| TRINITY_DN874_c0_g1_i1   | dmso | control | -0,7159795 | 4,14270068 | 8,65E-05   | 0,00092193 |
| TRINITY_DN2715_c0_g1_i1  | dmso | control | -0,7175626 | 8,18056029 | 1,78E-10   | 6,28E-09   |
| TRINITY_DN3355_c0_g1_i1  | dmso | control | -0,718046  | 3,92890871 | 0,00654731 | 0,0333131  |
| TRINITY_DN19654_c0_g1_i1 | dmso | control | -0,7180926 | 3,81714017 | 0,00014233 | 0,00141597 |
| TRINITY_DN9628_c0_g1_i1  | dmso | control | -0,7186875 | 1,21080086 | 0,02120674 | 0,08276989 |
| TRINITY_DN20611_c0_g1_i1 | dmso | control | -0,7196942 | 4,12152711 | 0,00010069 | 0,00105164 |
| TRINITY_DN33136_c0_g1_i1 | dmso | control | -0,7215455 | 3,11856276 | 0,00051482 | 0,00424705 |
| TRINITY_DN19275_c0_g1_i1 | dmso | control | -0,7261527 | 5,30212286 | 1,00E-05   | 0,00013998 |
| TRINITY_DN11519_c0_g1_i1 | dmso | control | -0,7274952 | 4,14301276 | 2,57E-05   | 0,00031975 |
| TRINITY_DN33705_c0_g1_i1 | dmso | control | -0,7275605 | 1,35439148 | 0,02668986 | 0,09828652 |
| TRINITY_DN23396_c0_g1_i1 | dmso | control | -0,7281792 | 5,49227681 | 2,67E-07   | 5,34E-06   |
| TRINITY_DN12658_c0_g1_i1 | dmso | control | -0,7293194 | 4,13698475 | 0,00353627 | 0,02064728 |
| TRINITY_DN25395_c0_g1_i1 | dmso | control | -0,7297102 | 2,02286955 | 0,01064804 | 0,04882885 |
| TRINITY_DN50781_c0_g1_i1 | dmso | control | -0,7299631 | 1,7012896  | 0,02256198 | 0,08670067 |
| TRINITY_DN19129_c0_g1_i1 | dmso | control | -0,7312643 | 6,05099629 | 1,53E-08   | 3,90E-07   |
| TRINITY_DN26912_c0_g1_i1 | dmso | control | -0,7318978 | 2,54436489 | 0,00267792 | 0,01650885 |

|                          |      |         |            |            |            |            |
|--------------------------|------|---------|------------|------------|------------|------------|
| TRINITY_DN14793_c0_g1_i1 | dmso | control | -0,7325797 | 3,49239438 | 0,00020376 | 0,00191376 |
| TRINITY_DN6811_c0_g1_i1  | dmso | control | -0,7342893 | 2,26568238 | 0,00638659 | 0,03266795 |
| TRINITY_DN8423_c0_g1_i1  | dmso | control | -0,7346867 | 2,88205696 | 0,00172051 | 0,01160804 |
| TRINITY_DN14172_c0_g1_i1 | dmso | control | -0,7357673 | 0,97255417 | 0,02249848 | 0,08650269 |
| TRINITY_DN15719_c0_g1_i1 | dmso | control | -0,7359681 | 2,47189311 | 0,00349388 | 0,02046599 |
| TRINITY_DN35480_c0_g1_i1 | dmso | control | -0,7361598 | 1,05724758 | 0,02514568 | 0,09390624 |
| TRINITY_DN33841_c0_g1_i1 | dmso | control | -0,7375263 | 3,6021696  | 0,00021117 | 0,00197308 |
| TRINITY_DN15865_c0_g1_i1 | dmso | control | -0,737712  | 4,51202281 | 3,53E-05   | 0,00042207 |
| TRINITY_DN15871_c0_g1_i1 | dmso | control | -0,738776  | 4,38518594 | 1,54E-05   | 0,00020475 |
| TRINITY_DN20029_c0_g1_i1 | dmso | control | -0,7389791 | 2,64418312 | 0,00299492 | 0,01806331 |
| TRINITY_DN36448_c0_g1_i1 | dmso | control | -0,7393051 | 2,34952396 | 0,0035086  | 0,02053554 |
| TRINITY_DN187_c0_g1_i1   | dmso | control | -0,7397367 | 6,48445306 | 1,03E-09   | 3,21E-08   |
| TRINITY_DN23110_c0_g1_i1 | dmso | control | -0,7413318 | 2,41923544 | 0,00207621 | 0,01348511 |
| TRINITY_DN15727_c0_g1_i1 | dmso | control | -0,7415187 | 1,80448819 | 0,01087267 | 0,04966976 |
| TRINITY_DN19385_c0_g1_i1 | dmso | control | -0,7418383 | 5,11108855 | 1,43E-05   | 0,00019221 |
| TRINITY_DN13173_c0_g1_i1 | dmso | control | -0,7433377 | 2,24725672 | 0,00370281 | 0,02137006 |
| TRINITY_DN6473_c0_g1_i1  | dmso | control | -0,7439745 | 2,76285259 | 0,00105733 | 0,00778048 |
| TRINITY_DN22102_c0_g1_i1 | dmso | control | -0,7452694 | 1,85778799 | 0,00646369 | 0,03295728 |
| TRINITY_DN6878_c0_g1_i1  | dmso | control | -0,7453374 | 3,13012221 | 0,00036129 | 0,00313425 |
| TRINITY_DN19876_c0_g1_i1 | dmso | control | -0,7459414 | 2,93211074 | 0,00086051 | 0,00655493 |
| TRINITY_DN18969_c0_g1_i1 | dmso | control | -0,7459872 | 5,26240019 | 2,47E-05   | 0,00030772 |
| TRINITY_DN2982_c0_g1_i1  | dmso | control | -0,7463121 | 3,99761849 | 6,62E-05   | 0,00073422 |
| TRINITY_DN18911_c0_g1_i1 | dmso | control | -0,7477633 | 7,485307   | 3,11E-09   | 8,86E-08   |
| TRINITY_DN6447_c0_g1_i1  | dmso | control | -0,748271  | 4,23258957 | 1,92E-05   | 0,0002482  |
| TRINITY_DN48034_c0_g1_i1 | dmso | control | -0,7487823 | 1,25410409 | 0,02124653 | 0,0828804  |
| TRINITY_DN5910_c0_g1_i1  | dmso | control | -0,7494635 | 4,64289291 | 1,42E-06   | 2,42E-05   |
| TRINITY_DN18773_c0_g1_i1 | dmso | control | -0,749581  | 5,88461403 | 1,77E-07   | 3,71E-06   |
| TRINITY_DN14376_c0_g1_i1 | dmso | control | -0,7496631 | 4,52244733 | 3,95E-05   | 0,0004658  |
| TRINITY_DN25333_c0_g1_i1 | dmso | control | -0,749836  | 0,89535329 | 0,02544086 | 0,09471473 |
| TRINITY_DN40298_c0_g1_i1 | dmso | control | -0,7499014 | 1,14147959 | 0,02260944 | 0,08681377 |
| TRINITY_DN4109_c0_g1_i1  | dmso | control | -0,7499134 | 1,14041879 | 0,02499038 | 0,09344707 |

|                          |      |         |            |            |            |            |
|--------------------------|------|---------|------------|------------|------------|------------|
| TRINITY_DN27310_c0_g1_i1 | dmso | control | -0,7499354 | 3,198103   | 0,00030009 | 0,00268409 |
| TRINITY_DN14452_c0_g1_i1 | dmso | control | -0,7499598 | 2,34527595 | 0,00536734 | 0,02853558 |
| TRINITY_DN35638_c0_g1_i1 | dmso | control | -0,7501977 | 2,74230174 | 0,00089648 | 0,00675514 |
| TRINITY_DN19826_c0_g1_i1 | dmso | control | -0,7502037 | 2,60442455 | 0,00290727 | 0,01762295 |
| TRINITY_DN44882_c0_g1_i1 | dmso | control | -0,7505496 | 1,7502595  | 0,00764677 | 0,03764851 |
| TRINITY_DN39912_c0_g1_i1 | dmso | control | -0,7514977 | 1,2697307  | 0,0163708  | 0,06783599 |
| TRINITY_DN14623_c0_g1_i1 | dmso | control | -0,7515885 | 2,88710225 | 0,00316794 | 0,01894858 |
| TRINITY_DN12577_c0_g1_i1 | dmso | control | -0,7517909 | 7,6444366  | 2,46E-08   | 6,03E-07   |
| TRINITY_DN3024_c0_g1_i1  | dmso | control | -0,7531904 | 2,23562698 | 0,00695542 | 0,03487365 |
| TRINITY_DN7989_c0_g1_i1  | dmso | control | -0,755567  | 2,84245736 | 0,00067467 | 0,00534301 |
| TRINITY_DN11884_c0_g1_i1 | dmso | control | -0,7557928 | 4,99953158 | 5,81E-07   | 1,07E-05   |
| TRINITY_DN13556_c0_g1_i1 | dmso | control | -0,7567249 | 4,43476539 | 2,84E-06   | 4,47E-05   |
| TRINITY_DN1407_c0_g1_i1  | dmso | control | -0,7572026 | 3,7950502  | 6,68E-05   | 0,00073958 |
| TRINITY_DN29930_c0_g1_i1 | dmso | control | -0,7575177 | 0,9490722  | 0,02104659 | 0,08232873 |
| TRINITY_DN8572_c0_g1_i1  | dmso | control | -0,759298  | 3,15039764 | 0,0035978  | 0,02090513 |
| TRINITY_DN34049_c0_g1_i1 | dmso | control | -0,7597492 | 0,70005299 | 0,02547748 | 0,09482663 |
| TRINITY_DN10130_c0_g1_i1 | dmso | control | -0,7606425 | 2,21244152 | 0,00289042 | 0,01755653 |
| TRINITY_DN36495_c0_g1_i1 | dmso | control | -0,7608015 | 1,09711429 | 0,01542589 | 0,06477527 |
| TRINITY_DN57454_c0_g1_i1 | dmso | control | -0,7610448 | 3,4129186  | 0,00039903 | 0,00340864 |
| TRINITY_DN19021_c0_g1_i1 | dmso | control | -0,7611323 | 5,28566129 | 5,93E-07   | 1,09E-05   |
| TRINITY_DN545_c0_g1_i1   | dmso | control | -0,7627068 | 4,3605934  | 8,54E-06   | 0,00012109 |
| TRINITY_DN12910_c0_g1_i1 | dmso | control | -0,7630929 | 1,96211024 | 0,00406799 | 0,02294499 |
| TRINITY_DN3419_c0_g1_i1  | dmso | control | -0,7635748 | 5,14331698 | 1,34E-07   | 2,90E-06   |
| TRINITY_DN13465_c0_g1_i1 | dmso | control | -0,7644016 | 0,90231437 | 0,02343454 | 0,08912901 |
| TRINITY_DN21794_c0_g1_i1 | dmso | control | -0,7665836 | 2,38475421 | 0,00194947 | 0,0127826  |
| TRINITY_DN22561_c0_g1_i1 | dmso | control | -0,768211  | 2,58789155 | 0,00376598 | 0,02164725 |
| TRINITY_DN48093_c0_g1_i1 | dmso | control | -0,768482  | 3,91955973 | 0,00012314 | 0,00124917 |
| TRINITY_DN19118_c0_g1_i1 | dmso | control | -0,7689597 | 8,20311435 | 1,71E-12   | 8,37E-11   |
| TRINITY_DN12632_c0_g1_i1 | dmso | control | -0,7691645 | 1,34376057 | 0,01297887 | 0,05703633 |
| TRINITY_DN35012_c0_g1_i1 | dmso | control | -0,7695473 | 1,87154201 | 0,00503456 | 0,02707528 |
| TRINITY_DN8188_c0_g1_i1  | dmso | control | -0,7702129 | 7,13868277 | 3,77E-10   | 1,27E-08   |

|                          |      |         |            |            |            |            |
|--------------------------|------|---------|------------|------------|------------|------------|
| TRINITY_DN13619_c0_g1_i1 | dmso | control | -0,7708604 | 3,69739303 | 3,93E-05   | 0,00046397 |
| TRINITY_DN24437_c0_g1_i1 | dmso | control | -0,77178   | 0,82242836 | 0,02105381 | 0,08232873 |
| TRINITY_DN7951_c0_g1_i1  | dmso | control | -0,7718838 | 1,48773768 | 0,01298186 | 0,05703633 |
| TRINITY_DN13025_c0_g1_i1 | dmso | control | -0,7721986 | 2,59660432 | 0,00108337 | 0,00792986 |
| TRINITY_DN25966_c0_g1_i1 | dmso | control | -0,7746784 | 1,46449534 | 0,00822582 | 0,03987314 |
| TRINITY_DN21752_c0_g1_i1 | dmso | control | -0,7754096 | 2,45401504 | 0,00220046 | 0,01410811 |
| TRINITY_DN10049_c0_g1_i1 | dmso | control | -0,7756215 | 2,56993899 | 0,00787505 | 0,038548   |
| TRINITY_DN14308_c0_g1_i1 | dmso | control | -0,7766622 | 3,49048862 | 8,94E-05   | 0,00094733 |
| TRINITY_DN13321_c0_g1_i1 | dmso | control | -0,777456  | 2,32745921 | 0,00201512 | 0,01314741 |
| TRINITY_DN78086_c0_g1_i1 | dmso | control | -0,7775582 | 1,98802302 | 0,00310397 | 0,01862885 |
| TRINITY_DN39228_c0_g1_i1 | dmso | control | -0,7777318 | 1,61835275 | 0,01910235 | 0,07645703 |
| TRINITY_DN7127_c0_g1_i1  | dmso | control | -0,7788939 | 4,11441365 | 0,00110462 | 0,0080587  |
| TRINITY_DN3634_c0_g1_i1  | dmso | control | -0,7792182 | 3,21749453 | 0,00034403 | 0,00301369 |
| TRINITY_DN9494_c0_g1_i1  | dmso | control | -0,7793698 | 7,0342302  | 2,49E-09   | 7,35E-08   |
| TRINITY_DN11847_c0_g1_i1 | dmso | control | -0,7824667 | 5,2240505  | 0,00023189 | 0,00214717 |
| TRINITY_DN12457_c0_g1_i1 | dmso | control | -0,7832015 | 3,14430832 | 0,00489375 | 0,02655532 |
| TRINITY_DN2_c0_g1_i1     | dmso | control | -0,783218  | 8,48975166 | 1,01E-11   | 4,42E-10   |
| TRINITY_DN19744_c0_g1_i1 | dmso | control | -0,7840652 | 2,02970388 | 0,00539813 | 0,02867817 |
| TRINITY_DN41295_c0_g1_i1 | dmso | control | -0,7841268 | 2,47437581 | 0,00168909 | 0,0114227  |
| TRINITY_DN17073_c0_g1_i1 | dmso | control | -0,7841846 | 3,6714079  | 8,66E-05   | 0,00092216 |
| TRINITY_DN8388_c0_g1_i1  | dmso | control | -0,7870902 | 3,93741282 | 4,43E-05   | 0,00051528 |
| TRINITY_DN20344_c0_g1_i1 | dmso | control | -0,7906991 | 1,85834492 | 0,01199607 | 0,05361275 |
| TRINITY_DN65788_c0_g1_i1 | dmso | control | -0,792192  | 3,61726949 | 6,62E-05   | 0,00073422 |
| TRINITY_DN34345_c0_g1_i1 | dmso | control | -0,7923873 | 1,83170181 | 0,00375994 | 0,02162976 |
| TRINITY_DN10921_c0_g1_i1 | dmso | control | -0,7934868 | 5,01616331 | 3,36E-07   | 6,56E-06   |
| TRINITY_DN36497_c0_g1_i1 | dmso | control | -0,7935226 | 3,94979913 | 7,90E-06   | 0,00011301 |
| TRINITY_DN21596_c0_g1_i1 | dmso | control | -0,7951231 | 1,90678929 | 0,00397507 | 0,02258311 |
| TRINITY_DN17755_c0_g1_i1 | dmso | control | -0,7951269 | 3,07329963 | 0,00018657 | 0,00177772 |
| TRINITY_DN2315_c0_g1_i1  | dmso | control | -0,795932  | 2,4731878  | 0,0007646  | 0,00592524 |
| TRINITY_DN14219_c0_g1_i1 | dmso | control | -0,7965565 | 4,24340749 | 2,44E-06   | 3,90E-05   |
| TRINITY_DN39229_c0_g1_i1 | dmso | control | -0,7971437 | 0,97223208 | 0,0194526  | 0,07755805 |

|                          |      |         |            |            |            |            |
|--------------------------|------|---------|------------|------------|------------|------------|
| TRINITY_DN2577_c0_g1_i1  | dmso | control | -0,7979653 | 2,15056191 | 0,00252746 | 0,01576389 |
| TRINITY_DN3509_c0_g1_i1  | dmso | control | -0,7996612 | 4,893824   | 3,44E-06   | 5,28E-05   |
| TRINITY_DN20671_c0_g1_i1 | dmso | control | -0,8008032 | 1,61504813 | 0,00606758 | 0,03142566 |
| TRINITY_DN6457_c0_g1_i1  | dmso | control | -0,8010668 | 2,48690014 | 0,00069495 | 0,00546764 |
| TRINITY_DN8979_c0_g1_i1  | dmso | control | -0,8029487 | 3,0641809  | 0,0001325  | 0,00132913 |
| TRINITY_DN11923_c0_g1_i1 | dmso | control | -0,8043405 | 4,18141337 | 5,97E-06   | 8,76E-05   |
| TRINITY_DN23124_c0_g1_i1 | dmso | control | -0,8043581 | 1,36206156 | 0,00855841 | 0,04109913 |
| TRINITY_DN35302_c0_g1_i1 | dmso | control | -0,8045378 | 1,13379146 | 0,0109908  | 0,05006688 |
| TRINITY_DN23614_c0_g1_i1 | dmso | control | -0,8067519 | 1,8664589  | 0,01217706 | 0,05423917 |
| TRINITY_DN13636_c0_g1_i1 | dmso | control | -0,8078746 | 1,82402426 | 0,00323145 | 0,01925674 |
| TRINITY_DN1025_c0_g1_i1  | dmso | control | -0,8078965 | 5,66165582 | 3,80E-09   | 1,06E-07   |
| TRINITY_DN9298_c0_g1_i1  | dmso | control | -0,8079271 | 3,48330598 | 3,02E-05   | 0,00036772 |
| TRINITY_DN4444_c0_g1_i1  | dmso | control | -0,8079534 | 4,93630126 | 8,41E-08   | 1,89E-06   |
| TRINITY_DN9314_c0_g1_i1  | dmso | control | -0,8092937 | 1,92918727 | 0,00342928 | 0,02012838 |
| TRINITY_DN18390_c0_g1_i1 | dmso | control | -0,8113951 | 2,30999611 | 0,00142492 | 0,00995307 |
| TRINITY_DN6646_c0_g1_i1  | dmso | control | -0,8122005 | 4,23779342 | 2,23E-06   | 3,59E-05   |
| TRINITY_DN38495_c0_g1_i1 | dmso | control | -0,8127814 | 3,07321296 | 0,0003315  | 0,00292696 |
| TRINITY_DN15774_c0_g1_i1 | dmso | control | -0,8136449 | 0,94358196 | 0,01849881 | 0,07462031 |
| TRINITY_DN21913_c0_g1_i1 | dmso | control | -0,814773  | 9,76480323 | 5,26E-11   | 2,02E-09   |
| TRINITY_DN37082_c0_g1_i1 | dmso | control | -0,8155254 | 2,18116406 | 0,00629839 | 0,03230719 |
| TRINITY_DN19306_c0_g1_i1 | dmso | control | -0,8155377 | 4,36538244 | 8,90E-06   | 0,0001254  |
| TRINITY_DN38880_c0_g1_i1 | dmso | control | -0,8160257 | 2,33056966 | 0,001398   | 0,00978873 |
| TRINITY_DN13876_c0_g1_i1 | dmso | control | -0,8188394 | 3,44694293 | 0,0004184  | 0,00355317 |
| TRINITY_DN19571_c0_g1_i1 | dmso | control | -0,8206124 | 3,21096298 | 0,00015518 | 0,00151975 |
| TRINITY_DN36465_c0_g1_i1 | dmso | control | -0,8208185 | 2,74289228 | 0,00034259 | 0,00300836 |
| TRINITY_DN35722_c0_g1_i1 | dmso | control | -0,820824  | 4,40422553 | 3,83E-07   | 7,38E-06   |
| TRINITY_DN34966_c0_g1_i1 | dmso | control | -0,8212886 | 0,54448994 | 0,02371676 | 0,09001275 |
| TRINITY_DN1644_c0_g1_i1  | dmso | control | -0,8221411 | 4,35689168 | 1,06E-06   | 1,84E-05   |
| TRINITY_DN13884_c0_g1_i1 | dmso | control | -0,8227007 | 2,70981492 | 0,00024501 | 0,00224562 |
| TRINITY_DN8602_c0_g1_i1  | dmso | control | -0,8227697 | 4,99508671 | 2,94E-08   | 7,09E-07   |
| TRINITY_DN49515_c0_g1_i1 | dmso | control | -0,8230539 | 2,02728975 | 0,00166839 | 0,01130922 |

|                          |      |         |            |            |            |            |
|--------------------------|------|---------|------------|------------|------------|------------|
| TRINITY_DN2648_c0_g1_i1  | dmso | control | -0,8233786 | 1,83222775 | 0,00263231 | 0,01627896 |
| TRINITY_DN3366_c0_g1_i1  | dmso | control | -0,8238637 | 1,45586497 | 0,02406816 | 0,09094024 |
| TRINITY_DN22055_c0_g1_i1 | dmso | control | -0,8242133 | 1,38326162 | 0,00905759 | 0,0429114  |
| TRINITY_DN22191_c0_g1_i1 | dmso | control | -0,8246308 | 2,38522748 | 0,00064906 | 0,00517705 |
| TRINITY_DN13410_c0_g1_i1 | dmso | control | -0,825191  | 1,71076402 | 0,00357147 | 0,02079959 |
| TRINITY_DN1375_c0_g1_i1  | dmso | control | -0,8257642 | 3,85252295 | 8,21E-06   | 0,00011712 |
| TRINITY_DN33623_c0_g1_i1 | dmso | control | -0,8276732 | 0,77927116 | 0,01804657 | 0,07322547 |
| TRINITY_DN40383_c0_g1_i1 | dmso | control | -0,8280748 | 3,71881064 | 7,42E-06   | 0,00010686 |
| TRINITY_DN7930_c0_g1_i1  | dmso | control | -0,828588  | 4,99260316 | 1,80E-08   | 4,51E-07   |
| TRINITY_DN28644_c0_g1_i1 | dmso | control | -0,8286131 | 2,25723006 | 0,01255282 | 0,05565716 |
| TRINITY_DN13434_c0_g1_i1 | dmso | control | -0,8287351 | 6,78646588 | 3,06E-12   | 1,44E-10   |
| TRINITY_DN35778_c0_g1_i1 | dmso | control | -0,8292236 | 1,66895735 | 0,00572753 | 0,03004146 |
| TRINITY_DN31957_c0_g1_i1 | dmso | control | -0,8300786 | 5,03063065 | 3,58E-07   | 6,93E-06   |
| TRINITY_DN12562_c0_g1_i1 | dmso | control | -0,8302781 | 3,72334236 | 9,61E-06   | 0,00013468 |
| TRINITY_DN22596_c0_g1_i1 | dmso | control | -0,8315649 | 3,33159907 | 7,29E-05   | 0,00079881 |
| TRINITY_DN37565_c0_g1_i1 | dmso | control | -0,8324223 | 1,55772216 | 0,00797273 | 0,03894693 |
| TRINITY_DN27586_c0_g1_i1 | dmso | control | -0,832841  | 2,65715796 | 0,00078926 | 0,00609949 |
| TRINITY_DN20314_c0_g1_i1 | dmso | control | -0,8332947 | 2,10406015 | 0,00142565 | 0,00995328 |
| TRINITY_DN22668_c0_g1_i1 | dmso | control | -0,8341047 | 2,67697077 | 0,00038701 | 0,00331966 |
| TRINITY_DN2671_c0_g1_i1  | dmso | control | -0,8355206 | 1,80818168 | 0,00202146 | 0,01318285 |
| TRINITY_DN15390_c0_g1_i1 | dmso | control | -0,8364327 | 3,86108699 | 8,93E-06   | 0,00012559 |
| TRINITY_DN38068_c0_g1_i1 | dmso | control | -0,8371352 | 1,18854061 | 0,00757153 | 0,03735339 |
| TRINITY_DN20854_c0_g1_i1 | dmso | control | -0,8371542 | 0,59357437 | 0,02163969 | 0,0840509  |
| TRINITY_DN57087_c0_g1_i1 | dmso | control | -0,8373157 | 1,65737717 | 0,01152528 | 0,05192847 |
| TRINITY_DN6322_c0_g1_i1  | dmso | control | -0,8381843 | 1,44726494 | 0,00624381 | 0,03210816 |
| TRINITY_DN15124_c0_g1_i1 | dmso | control | -0,8384783 | 4,89721082 | 1,46E-06   | 2,47E-05   |
| TRINITY_DN43491_c0_g1_i1 | dmso | control | -0,8386493 | 2,47338671 | 0,00591904 | 0,03077774 |
| TRINITY_DN33723_c0_g1_i1 | dmso | control | -0,8390284 | 0,63010683 | 0,02202402 | 0,08499518 |
| TRINITY_DN16235_c0_g1_i1 | dmso | control | -0,8404733 | 4,24098318 | 1,83E-06   | 3,03E-05   |
| TRINITY_DN38603_c0_g1_i1 | dmso | control | -0,8415302 | 1,60597875 | 0,00287876 | 0,01750154 |
| TRINITY_DN2672_c0_g1_i1  | dmso | control | -0,8426755 | 2,4806538  | 0,00124936 | 0,00895189 |

|                          |      |         |            |            |            |            |
|--------------------------|------|---------|------------|------------|------------|------------|
| TRINITY_DN3079_c0_g1_i1  | dmso | control | -0,8429764 | 1,79970601 | 0,00197476 | 0,0129308  |
| TRINITY_DN1694_c0_g1_i1  | dmso | control | -0,84456   | 2,66572768 | 0,00066595 | 0,00528953 |
| TRINITY_DN14317_c0_g1_i1 | dmso | control | -0,84567   | 2,23067913 | 0,00582533 | 0,03043287 |
| TRINITY_DN18919_c0_g1_i1 | dmso | control | -0,8473165 | 5,4057269  | 2,35E-07   | 4,76E-06   |
| TRINITY_DN19443_c0_g1_i1 | dmso | control | -0,8473644 | 2,3518265  | 0,00068693 | 0,00541633 |
| TRINITY_DN12730_c0_g1_i1 | dmso | control | -0,8492181 | 2,57494984 | 0,00727601 | 0,0362171  |
| TRINITY_DN12566_c0_g1_i1 | dmso | control | -0,8495493 | 4,15873018 | 1,84E-06   | 3,03E-05   |
| TRINITY_DN11260_c0_g1_i1 | dmso | control | -0,8500856 | 3,89721887 | 4,05E-06   | 6,12E-05   |
| TRINITY_DN12617_c0_g1_i1 | dmso | control | -0,8508292 | 5,39921867 | 1,52E-06   | 2,57E-05   |
| TRINITY_DN15945_c0_g1_i1 | dmso | control | -0,8514814 | 3,80848037 | 1,32E-05   | 0,00017884 |
| TRINITY_DN5476_c0_g1_i1  | dmso | control | -0,8518104 | 5,14831929 | 4,92E-07   | 9,21E-06   |
| TRINITY_DN27614_c0_g1_i1 | dmso | control | -0,8538083 | 1,88948441 | 0,0020557  | 0,01336992 |
| TRINITY_DN32739_c0_g1_i1 | dmso | control | -0,8548083 | 1,70207705 | 0,00455272 | 0,02515954 |
| TRINITY_DN15891_c0_g1_i1 | dmso | control | -0,8553168 | 2,5273527  | 0,00335188 | 0,0197624  |
| TRINITY_DN8047_c0_g1_i1  | dmso | control | -0,8566149 | 7,24298252 | 1,93E-11   | 8,05E-10   |
| TRINITY_DN4178_c0_g1_i1  | dmso | control | -0,8571072 | 0,32284563 | 0,0224046  | 0,08621055 |
| TRINITY_DN21642_c0_g1_i1 | dmso | control | -0,8585589 | 1,6906238  | 0,00273254 | 0,01676074 |
| TRINITY_DN7944_c0_g1_i1  | dmso | control | -0,8586157 | 3,84272963 | 1,26E-05   | 0,00017228 |
| TRINITY_DN26352_c0_g1_i1 | dmso | control | -0,858801  | 0,5541122  | 0,02048926 | 0,08062309 |
| TRINITY_DN25661_c0_g1_i1 | dmso | control | -0,8590135 | 1,75792739 | 0,00257802 | 0,01601696 |
| TRINITY_DN2960_c0_g1_i1  | dmso | control | -0,8613309 | 3,25164887 | 0,00012504 | 0,00126571 |
| TRINITY_DN17460_c0_g1_i1 | dmso | control | -0,8629452 | 4,47554365 | 6,91E-07   | 1,25E-05   |
| TRINITY_DN21131_c0_g1_i1 | dmso | control | -0,8634154 | 1,83228395 | 0,00498566 | 0,02690248 |
| TRINITY_DN6000_c0_g1_i1  | dmso | control | -0,8640384 | 3,76580436 | 5,63E-06   | 8,30E-05   |
| TRINITY_DN4493_c0_g1_i1  | dmso | control | -0,8641834 | 3,20756906 | 4,62E-05   | 0,00053452 |
| TRINITY_DN20046_c0_g1_i1 | dmso | control | -0,8658535 | 0,51736652 | 0,02622259 | 0,09691197 |
| TRINITY_DN7939_c0_g1_i1  | dmso | control | -0,8664524 | 1,13177993 | 0,00610039 | 0,03153906 |
| TRINITY_DN664_c0_g1_i1   | dmso | control | -0,8672143 | 7,83510847 | 8,26E-14   | 4,89E-12   |
| TRINITY_DN44043_c0_g1_i1 | dmso | control | -0,8682216 | 0,67731877 | 0,02307937 | 0,08814953 |
| TRINITY_DN8766_c0_g1_i1  | dmso | control | -0,8687062 | 2,52009064 | 0,00076293 | 0,00591867 |
| TRINITY_DN4879_c0_g1_i1  | dmso | control | -0,8694128 | 4,41465616 | 1,30E-07   | 2,82E-06   |

|                          |      |         |            |            |            |            |
|--------------------------|------|---------|------------|------------|------------|------------|
| TRINITY_DN23015_c0_g1_i1 | dmso | control | -0,8711402 | 1,45477135 | 0,00519597 | 0,02775914 |
| TRINITY_DN32733_c0_g1_i1 | dmso | control | -0,8740132 | 3,19768314 | 8,33E-05   | 0,0008909  |
| TRINITY_DN10520_c0_g1_i1 | dmso | control | -0,8754205 | 2,58013024 | 0,00186305 | 0,01235051 |
| TRINITY_DN32782_c0_g1_i1 | dmso | control | -0,8762484 | 1,13154002 | 0,01508574 | 0,06360583 |
| TRINITY_DN3412_c0_g1_i1  | dmso | control | -0,8762488 | 2,68704406 | 0,00474486 | 0,02591283 |
| TRINITY_DN15106_c0_g1_i1 | dmso | control | -0,8763741 | 1,14763125 | 0,00733926 | 0,03645656 |
| TRINITY_DN14017_c0_g1_i1 | dmso | control | -0,8791247 | 4,78157849 | 3,01E-08   | 7,22E-07   |
| TRINITY_DN25298_c0_g1_i1 | dmso | control | -0,8806695 | 0,77118678 | 0,01822906 | 0,07379992 |
| TRINITY_DN29726_c0_g1_i1 | dmso | control | -0,8808099 | 0,62520138 | 0,01689189 | 0,06953642 |
| TRINITY_DN20900_c0_g1_i1 | dmso | control | -0,8808269 | 0,75515536 | 0,0111474  | 0,05058883 |
| TRINITY_DN23138_c0_g1_i1 | dmso | control | -0,8809263 | 3,43826879 | 7,57E-06   | 0,00010897 |
| TRINITY_DN18521_c0_g1_i1 | dmso | control | -0,8810284 | 1,04118718 | 0,00691581 | 0,03469918 |
| TRINITY_DN10312_c0_g1_i1 | dmso | control | -0,8813496 | 1,76341548 | 0,00651758 | 0,03318523 |
| TRINITY_DN27672_c0_g1_i1 | dmso | control | -0,8823457 | 1,69000119 | 0,0035313  | 0,02063499 |
| TRINITY_DN24234_c0_g1_i1 | dmso | control | -0,8832318 | 3,24690557 | 1,03E-05   | 0,00014356 |
| TRINITY_DN3821_c0_g1_i1  | dmso | control | -0,8837932 | 0,16938149 | 0,02303058 | 0,08800972 |
| TRINITY_DN35436_c0_g1_i1 | dmso | control | -0,8866771 | 0,91379824 | 0,01883379 | 0,07563362 |
| TRINITY_DN15987_c0_g1_i1 | dmso | control | -0,8878792 | 0,25232204 | 0,02498162 | 0,09344707 |
| TRINITY_DN18635_c0_g1_i1 | dmso | control | -0,8895768 | 10,2929787 | 1,05E-14   | 7,08E-13   |
| TRINITY_DN2222_c0_g1_i1  | dmso | control | -0,890123  | 5,26234581 | 6,01E-10   | 1,96E-08   |
| TRINITY_DN18222_c0_g1_i1 | dmso | control | -0,8925985 | 0,34597468 | 0,02386145 | 0,09046616 |
| TRINITY_DN15409_c0_g1_i1 | dmso | control | -0,8930417 | 2,10339938 | 0,00066724 | 0,00529576 |
| TRINITY_DN12641_c0_g1_i1 | dmso | control | -0,8941588 | 4,94980847 | 1,54E-08   | 3,93E-07   |
| TRINITY_DN16881_c0_g1_i1 | dmso | control | -0,8942725 | 2,36459069 | 0,0002973  | 0,00266412 |
| TRINITY_DN7672_c0_g1_i1  | dmso | control | -0,8949301 | 3,78239585 | 1,94E-05   | 0,00024972 |
| TRINITY_DN40204_c0_g1_i1 | dmso | control | -0,896656  | 0,47985026 | 0,02031333 | 0,08012725 |
| TRINITY_DN42588_c0_g1_i1 | dmso | control | -0,8975891 | 1,76884549 | 0,00107409 | 0,00788908 |
| TRINITY_DN14997_c0_g1_i1 | dmso | control | -0,8976223 | 2,437588   | 0,00058077 | 0,00470512 |
| TRINITY_DN37016_c0_g1_i1 | dmso | control | -0,899193  | 4,23763728 | 8,48E-07   | 1,51E-05   |
| TRINITY_DN8071_c0_g1_i1  | dmso | control | -0,8999596 | 2,02743786 | 0,00258894 | 0,01607099 |
| TRINITY_DN23609_c0_g1_i1 | dmso | control | -0,9004166 | 8,67436616 | 4,56E-09   | 1,26E-07   |



|                          |      |         |            |            |            |            |
|--------------------------|------|---------|------------|------------|------------|------------|
| TRINITY_DN32792_c0_g1_i1 | dmso | control | -0,9014617 | 2,48075102 | 0,00047858 | 0,00398448 |
| TRINITY_DN15593_c0_g1_i1 | dmso | control | -0,9030048 | 2,72017063 | 7,53E-05   | 0,00082012 |
| TRINITY_DN62957_c0_g1_i1 | dmso | control | -0,9030155 | 2,03897386 | 0,00089839 | 0,00676251 |
| TRINITY_DN33737_c0_g1_i1 | dmso | control | -0,9036522 | 1,71438536 | 0,00485548 | 0,02636742 |
| TRINITY_DN9571_c0_g1_i1  | dmso | control | -0,904126  | 1,52311898 | 0,0050101  | 0,02697462 |
| TRINITY_DN14486_c0_g1_i1 | dmso | control | -0,9055227 | 4,83125011 | 2,56E-09   | 7,54E-08   |
| TRINITY_DN44971_c0_g1_i1 | dmso | control | -0,9055988 | 2,80678919 | 6,31E-05   | 0,00070447 |
| TRINITY_DN22848_c0_g1_i1 | dmso | control | -0,906368  | 3,76987727 | 1,77E-05   | 0,00023071 |
| TRINITY_DN36475_c0_g1_i1 | dmso | control | -0,9076823 | 5,82166522 | 4,33E-11   | 1,69E-09   |
| TRINITY_DN8847_c0_g1_i1  | dmso | control | -0,9085    | 0,77943008 | 0,01354918 | 0,0588864  |
| TRINITY_DN5390_c0_g1_i1  | dmso | control | -0,9087042 | 5,46510745 | 5,16E-06   | 7,68E-05   |
| TRINITY_DN20793_c0_g1_i1 | dmso | control | -0,9092468 | 6,58137582 | 6,42E-13   | 3,45E-11   |
| TRINITY_DN10502_c0_g1_i1 | dmso | control | -0,9106523 | 6,19546968 | 8,22E-13   | 4,38E-11   |
| TRINITY_DN12317_c0_g1_i1 | dmso | control | -0,9124504 | 5,04588229 | 6,95E-08   | 1,59E-06   |
| TRINITY_DN3215_c0_g1_i1  | dmso | control | -0,9125652 | 4,33626378 | 0,01387851 | 0,05970073 |
| TRINITY_DN34948_c0_g1_i1 | dmso | control | -0,9138423 | 0,78704441 | 0,00859608 | 0,04125262 |
| TRINITY_DN21166_c0_g1_i1 | dmso | control | -0,9141285 | 5,79610806 | 9,41E-10   | 2,97E-08   |
| TRINITY_DN34008_c0_g1_i1 | dmso | control | -0,9148596 | 2,02196954 | 0,00074616 | 0,00581352 |
| TRINITY_DN37732_c0_g1_i1 | dmso | control | -0,9155855 | 2,00939539 | 0,00044351 | 0,00372907 |
| TRINITY_DN33431_c0_g1_i1 | dmso | control | -0,9156137 | 1,62509705 | 0,00181781 | 0,01212293 |
| TRINITY_DN28790_c0_g1_i1 | dmso | control | -0,9161123 | 1,64310346 | 0,00654039 | 0,03328961 |
| TRINITY_DN1521_c0_g1_i1  | dmso | control | -0,9169423 | 4,23723012 | 8,93E-06   | 0,00012559 |
| TRINITY_DN9332_c0_g1_i1  | dmso | control | -0,9169817 | 3,76451682 | 7,10E-07   | 1,28E-05   |
| TRINITY_DN17568_c0_g1_i1 | dmso | control | -0,9188364 | 2,48661525 | 0,00088728 | 0,00669635 |
| TRINITY_DN29477_c0_g1_i1 | dmso | control | -0,9208263 | 0,62516913 | 0,01045768 | 0,04808967 |
| TRINITY_DN39257_c0_g1_i1 | dmso | control | -0,92202   | 0,49812174 | 0,01892803 | 0,07594874 |
| TRINITY_DN29822_c0_g1_i1 | dmso | control | -0,9220208 | 0,5357507  | 0,01049806 | 0,04823297 |
| TRINITY_DN33765_c0_g1_i1 | dmso | control | -0,9229075 | 3,14809038 | 6,43E-06   | 9,37E-05   |
| TRINITY_DN11165_c0_g1_i1 | dmso | control | -0,9231638 | 4,46403294 | 6,61E-08   | 1,51E-06   |
| TRINITY_DN9705_c0_g1_i1  | dmso | control | -0,9234909 | 3,22033191 | 5,05E-05   | 0,00057851 |
| TRINITY_DN35667_c0_g1_i1 | dmso | control | -0,9264844 | -0,0007957 | 0,02511274 | 0,09383176 |

|                          |      |         |            |            |            |            |
|--------------------------|------|---------|------------|------------|------------|------------|
| TRINITY_DN11600_c0_g1_i1 | dmso | control | -0,9289096 | 5,92697759 | 0,00023091 | 0,0021395  |
| TRINITY_DN12133_c0_g1_i1 | dmso | control | -0,9292337 | 3,79185813 | 2,49E-06   | 3,98E-05   |
| TRINITY_DN30037_c0_g1_i1 | dmso | control | -0,9301781 | 0,31714599 | 0,01861125 | 0,07499008 |
| TRINITY_DN20837_c0_g1_i1 | dmso | control | -0,9306435 | 3,59049596 | 1,03E-06   | 1,80E-05   |
| TRINITY_DN14117_c0_g1_i1 | dmso | control | -0,9310725 | 1,26244609 | 0,00279219 | 0,01707586 |
| TRINITY_DN33789_c0_g1_i1 | dmso | control | -0,9338081 | 7,7605221  | 1,42E-14   | 9,39E-13   |
| TRINITY_DN22260_c0_g1_i1 | dmso | control | -0,9346906 | 3,51318221 | 2,25E-06   | 3,63E-05   |
| TRINITY_DN9702_c0_g1_i1  | dmso | control | -0,9356374 | 3,03327688 | 9,07E-05   | 0,00095964 |
| TRINITY_DN44188_c0_g1_i1 | dmso | control | -0,9365155 | 1,89708674 | 0,00053888 | 0,00441751 |
| TRINITY_DN22919_c0_g1_i1 | dmso | control | -0,9368954 | 1,57871853 | 0,00290602 | 0,01762278 |
| TRINITY_DN4365_c0_g1_i1  | dmso | control | -0,9371019 | 3,03146121 | 0,00011792 | 0,00120547 |
| TRINITY_DN20168_c0_g1_i1 | dmso | control | -0,9372788 | 2,23554584 | 0,00032365 | 0,00286818 |
| TRINITY_DN30211_c0_g1_i1 | dmso | control | -0,9386588 | 0,31791114 | 0,0131323  | 0,05751718 |
| TRINITY_DN13240_c0_g1_i1 | dmso | control | -0,9407045 | 1,38415384 | 0,00229785 | 0,01456067 |
| TRINITY_DN17195_c0_g1_i1 | dmso | control | -0,9410624 | 2,24505306 | 0,00034282 | 0,00300853 |
| TRINITY_DN15770_c0_g1_i1 | dmso | control | -0,9437714 | 1,09513367 | 0,00307628 | 0,01849227 |
| TRINITY_DN15684_c0_g1_i1 | dmso | control | -0,9462165 | 2,62325336 | 4,94E-05   | 0,00056854 |
| TRINITY_DN6345_c0_g1_i1  | dmso | control | -0,9471662 | 0,6165385  | 0,01024739 | 0,04736884 |
| TRINITY_DN2280_c0_g1_i1  | dmso | control | -0,9511106 | 4,20484966 | 0,00557347 | 0,02937203 |
| TRINITY_DN6120_c0_g1_i1  | dmso | control | -0,9516035 | 5,10227768 | 2,88E-09   | 8,32E-08   |
| TRINITY_DN24178_c0_g1_i1 | dmso | control | -0,9532662 | 2,6896564  | 2,78E-05   | 0,00034203 |
| TRINITY_DN22493_c0_g1_i1 | dmso | control | -0,9539245 | 1,70914076 | 0,0019504  | 0,01278288 |
| TRINITY_DN17454_c0_g1_i1 | dmso | control | -0,9550941 | 2,48684864 | 0,0001711  | 0,0016499  |
| TRINITY_DN22842_c0_g1_i1 | dmso | control | -0,9562923 | 2,14010258 | 0,00021574 | 0,00201184 |
| TRINITY_DN15158_c0_g1_i1 | dmso | control | -0,9563765 | 3,45794623 | 2,90E-05   | 0,0003536  |
| TRINITY_DN24335_c0_g1_i1 | dmso | control | -0,9573634 | 2,59578727 | 0,00015372 | 0,00150646 |
| TRINITY_DN17990_c0_g1_i1 | dmso | control | -0,9583914 | 2,23141385 | 0,00024224 | 0,00222451 |
| TRINITY_DN22613_c0_g1_i1 | dmso | control | -0,9590933 | 0,77342065 | 0,01133657 | 0,05130226 |
| TRINITY_DN37935_c0_g1_i1 | dmso | control | -0,9595218 | -0,0155229 | 0,02434415 | 0,09157584 |
| TRINITY_DN37166_c0_g1_i1 | dmso | control | -0,9597981 | 0,78165819 | 0,00590962 | 0,03076198 |
| TRINITY_DN12364_c0_g1_i1 | dmso | control | -0,9603703 | 3,83459315 | 1,29E-07   | 2,81E-06   |

|                          |      |         |            |            |            |            |
|--------------------------|------|---------|------------|------------|------------|------------|
| TRINITY_DN34422_c0_g1_i1 | dmso | control | -0,9623095 | 1,56064203 | 0,02489438 | 0,09321155 |
| TRINITY_DN24198_c0_g1_i1 | dmso | control | -0,9625411 | 0,39319917 | 0,01717954 | 0,07047953 |
| TRINITY_DN2934_c0_g1_i1  | dmso | control | -0,963299  | 3,80756686 | 1,62E-07   | 3,41E-06   |
| TRINITY_DN33441_c0_g1_i1 | dmso | control | -0,9641239 | 4,64314138 | 1,47E-08   | 3,76E-07   |
| TRINITY_DN14193_c0_g1_i1 | dmso | control | -0,9642792 | 4,32697568 | 2,15E-06   | 3,47E-05   |
| TRINITY_DN45310_c0_g1_i1 | dmso | control | -0,9646831 | 3,47019007 | 6,91E-07   | 1,25E-05   |
| TRINITY_DN23578_c0_g1_i1 | dmso | control | -0,9650565 | 1,25172181 | 0,00192072 | 0,01266574 |
| TRINITY_DN11363_c0_g1_i1 | dmso | control | -0,9653275 | 6,29757344 | 1,34E-09   | 4,09E-08   |
| TRINITY_DN32260_c0_g1_i1 | dmso | control | -0,9680789 | 5,18382016 | 3,51E-11   | 1,39E-09   |
| TRINITY_DN6086_c0_g1_i1  | dmso | control | -0,9689962 | 4,25514794 | 1,61E-06   | 2,70E-05   |
| TRINITY_DN29116_c0_g1_i1 | dmso | control | -0,9690494 | 4,27318146 | 7,81E-09   | 2,09E-07   |
| TRINITY_DN37127_c0_g1_i1 | dmso | control | -0,9691815 | 1,79550853 | 0,00251214 | 0,01570224 |
| TRINITY_DN55145_c0_g1_i1 | dmso | control | -0,970625  | -0,010516  | 0,01548977 | 0,0649386  |
| TRINITY_DN27845_c0_g1_i1 | dmso | control | -0,9710512 | 4,89279691 | 5,92E-10   | 1,94E-08   |
| TRINITY_DN24316_c0_g1_i1 | dmso | control | -0,9712647 | 2,06335192 | 0,00064626 | 0,00515756 |
| TRINITY_DN49195_c0_g1_i1 | dmso | control | -0,971945  | 0,4683545  | 0,00769601 | 0,03782539 |
| TRINITY_DN23284_c0_g1_i1 | dmso | control | -0,9740551 | 1,09787244 | 0,00262538 | 0,01624835 |
| TRINITY_DN21945_c0_g1_i1 | dmso | control | -0,9750416 | 0,75683037 | 0,00733104 | 0,03642821 |
| TRINITY_DN3367_c0_g1_i1  | dmso | control | -0,9771757 | 3,65873998 | 1,84E-06   | 3,03E-05   |
| TRINITY_DN14023_c0_g1_i1 | dmso | control | -0,9782978 | 2,64745179 | 3,97E-05   | 0,00046751 |
| TRINITY_DN5541_c0_g1_i1  | dmso | control | -0,9798715 | 3,95579241 | 2,86E-07   | 5,67E-06   |
| TRINITY_DN36356_c0_g1_i1 | dmso | control | -0,9801478 | 1,66390577 | 0,00133333 | 0,00942728 |
| TRINITY_DN50735_c0_g1_i1 | dmso | control | -0,980625  | 1,02692246 | 0,0065985  | 0,03350277 |
| TRINITY_DN36888_c0_g1_i1 | dmso | control | -0,9806929 | 0,25896452 | 0,01031643 | 0,04759528 |
| TRINITY_DN11973_c0_g1_i1 | dmso | control | -0,981486  | 3,3611247  | 2,74E-05   | 0,00033801 |
| TRINITY_DN34074_c0_g1_i1 | dmso | control | -0,9818187 | 3,35927666 | 1,67E-05   | 0,00021924 |
| TRINITY_DN5408_c0_g1_i1  | dmso | control | -0,9818897 | 5,47266204 | 8,67E-12   | 3,79E-10   |
| TRINITY_DN612_c0_g1_i1   | dmso | control | -0,9819838 | 3,95748096 | 0,00955959 | 0,04484403 |
| TRINITY_DN3446_c0_g1_i1  | dmso | control | -0,9821326 | 4,38980906 | 3,54E-09   | 9,95E-08   |
| TRINITY_DN4399_c0_g1_i1  | dmso | control | -0,9845935 | 0,62512546 | 0,00754285 | 0,03723732 |
| TRINITY_DN24454_c0_g1_i1 | dmso | control | -0,9875298 | 1,47569749 | 0,00090891 | 0,00681685 |

|                          |      |         |            |            |            |            |
|--------------------------|------|---------|------------|------------|------------|------------|
| TRINITY_DN23374_c0_g1_i1 | dmso | control | -0,9885678 | 0,50535801 | 0,0061471  | 0,03171244 |
| TRINITY_DN36484_c0_g1_i1 | dmso | control | -0,990085  | 1,3917176  | 0,00411863 | 0,0231763  |
| TRINITY_DN24378_c0_g1_i1 | dmso | control | -0,9959238 | 2,31360759 | 0,0001719  | 0,00165543 |
| TRINITY_DN15652_c0_g1_i1 | dmso | control | -0,9962568 | 3,84217032 | 1,92E-07   | 4,00E-06   |
| TRINITY_DN26378_c0_g1_i1 | dmso | control | -1,0047836 | 0,81207338 | 0,00804281 | 0,03918327 |
| TRINITY_DN11151_c0_g1_i1 | dmso | control | -1,0051837 | 6,49787012 | 5,03E-17   | 4,30E-15   |
| TRINITY_DN21303_c0_g1_i1 | dmso | control | -1,0070044 | 3,32855826 | 8,53E-07   | 1,52E-05   |
| TRINITY_DN34518_c0_g1_i1 | dmso | control | -1,0085608 | 5,96425041 | 4,12E-14   | 2,53E-12   |
| TRINITY_DN8099_c0_g1_i1  | dmso | control | -1,0100188 | 3,526958   | 1,46E-06   | 2,47E-05   |
| TRINITY_DN12410_c0_g1_i1 | dmso | control | -1,0102959 | 3,96306642 | 7,89E-07   | 1,42E-05   |
| TRINITY_DN5013_c0_g1_i1  | dmso | control | -1,0132093 | 4,13020507 | 1,69E-08   | 4,25E-07   |
| TRINITY_DN40700_c0_g1_i1 | dmso | control | -1,0146236 | -0,1322421 | 0,01437428 | 0,06126776 |
| TRINITY_DN2246_c0_g1_i1  | dmso | control | -1,0157067 | 4,49193345 | 1,63E-10   | 5,83E-09   |
| TRINITY_DN16142_c0_g1_i1 | dmso | control | -1,0159426 | 1,66615089 | 0,00049983 | 0,00413282 |
| TRINITY_DN21472_c0_g1_i1 | dmso | control | -1,0187332 | 2,40668928 | 0,00084856 | 0,00647172 |
| TRINITY_DN63104_c0_g1_i1 | dmso | control | -1,0195115 | 2,66872387 | 1,78E-05   | 0,00023094 |
| TRINITY_DN19366_c0_g1_i1 | dmso | control | -1,0205581 | 3,93993618 | 2,48E-08   | 6,06E-07   |
| TRINITY_DN2379_c0_g1_i1  | dmso | control | -1,0213029 | 5,74844612 | 3,14E-14   | 1,97E-12   |
| TRINITY_DN24525_c0_g1_i1 | dmso | control | -1,0213523 | 1,63995425 | 0,00028572 | 0,00256986 |
| TRINITY_DN55878_c0_g1_i1 | dmso | control | -1,0233155 | 2,39580589 | 6,52E-05   | 0,00072486 |
| TRINITY_DN33984_c0_g1_i1 | dmso | control | -1,0243454 | 0,26125283 | 0,01063543 | 0,04878652 |
| TRINITY_DN39253_c0_g1_i1 | dmso | control | -1,0252889 | 0,36982739 | 0,00887849 | 0,04225694 |
| TRINITY_DN1113_c0_g1_i1  | dmso | control | -1,0259972 | 3,77228409 | 2,64E-08   | 6,41E-07   |
| TRINITY_DN31982_c0_g1_i1 | dmso | control | -1,0272198 | 0,07865731 | 0,02712698 | 0,0995981  |
| TRINITY_DN13375_c0_g1_i1 | dmso | control | -1,0279032 | 4,09112559 | 2,42E-07   | 4,87E-06   |
| TRINITY_DN67133_c0_g1_i1 | dmso | control | -1,0298852 | 0,15208566 | 0,01416866 | 0,06064185 |
| TRINITY_DN34668_c0_g1_i1 | dmso | control | -1,030549  | 0,43440108 | 0,00767554 | 0,0377505  |
| TRINITY_DN24941_c0_g1_i1 | dmso | control | -1,0326411 | 1,10222259 | 0,00180087 | 0,01203775 |
| TRINITY_DN25567_c0_g1_i1 | dmso | control | -1,0362832 | 1,16959255 | 0,00309772 | 0,01861335 |
| TRINITY_DN27452_c0_g1_i1 | dmso | control | -1,0373533 | 1,10586858 | 0,00121072 | 0,00870525 |
| TRINITY_DN26239_c0_g1_i1 | dmso | control | -1,0374142 | 1,16728736 | 0,00246253 | 0,01543224 |

|                          |      |         |            |            |            |            |
|--------------------------|------|---------|------------|------------|------------|------------|
| TRINITY_DN24795_c0_g1_i1 | dmso | control | -1,0411832 | 2,7510019  | 1,48E-05   | 0,00019769 |
| TRINITY_DN22464_c0_g1_i1 | dmso | control | -1,0414487 | 1,15640313 | 0,00099327 | 0,0073465  |
| TRINITY_DN24418_c0_g1_i1 | dmso | control | -1,0416544 | -0,0035556 | 0,02197344 | 0,08486814 |
| TRINITY_DN13194_c0_g1_i1 | dmso | control | -1,0426486 | 1,26238774 | 0,00185624 | 0,0123278  |
| TRINITY_DN13091_c0_g1_i1 | dmso | control | -1,0438962 | 2,45515098 | 1,49E-05   | 0,00019853 |
| TRINITY_DN15595_c0_g1_i1 | dmso | control | -1,0439666 | 2,18554327 | 6,11E-05   | 0,00068545 |
| TRINITY_DN59569_c0_g1_i1 | dmso | control | -1,0445656 | 0,89947176 | 0,00184929 | 0,0122988  |
| TRINITY_DN14387_c0_g1_i1 | dmso | control | -1,0446678 | 1,93922108 | 7,76E-05   | 0,00084058 |
| TRINITY_DN6561_c0_g1_i1  | dmso | control | -1,0451755 | 3,43792182 | 8,18E-05   | 0,0008792  |
| TRINITY_DN2674_c0_g1_i1  | dmso | control | -1,0452201 | 4,50140925 | 3,45E-08   | 8,19E-07   |
| TRINITY_DN13880_c0_g1_i1 | dmso | control | -1,0487405 | 2,63962307 | 1,28E-05   | 0,00017455 |
| TRINITY_DN25069_c0_g1_i1 | dmso | control | -1,0487645 | 0,63563748 | 0,00378204 | 0,02171368 |
| TRINITY_DN2419_c0_g1_i1  | dmso | control | -1,0498659 | 4,57273903 | 2,25E-11   | 9,27E-10   |
| TRINITY_DN37611_c0_g1_i1 | dmso | control | -1,0502622 | 0,87866603 | 0,00254304 | 0,01584652 |
| TRINITY_DN30443_c0_g1_i1 | dmso | control | -1,0506439 | 1,47929935 | 0,00177549 | 0,01190116 |
| TRINITY_DN12522_c0_g1_i1 | dmso | control | -1,0508502 | 2,78660429 | 5,13E-06   | 7,65E-05   |
| TRINITY_DN12227_c0_g1_i1 | dmso | control | -1,051528  | 3,99006594 | 2,17E-05   | 0,00027455 |
| TRINITY_DN20547_c0_g1_i1 | dmso | control | -1,0529086 | 0,13095554 | 0,01318592 | 0,05766594 |
| TRINITY_DN14346_c0_g1_i1 | dmso | control | -1,0532543 | 1,1496968  | 0,00142905 | 0,00996745 |
| TRINITY_DN19350_c0_g1_i1 | dmso | control | -1,0548401 | 4,30104082 | 1,78E-08   | 4,48E-07   |
| TRINITY_DN11200_c0_g1_i1 | dmso | control | -1,0550491 | 1,45970968 | 0,00337484 | 0,01985728 |
| TRINITY_DN13423_c0_g1_i1 | dmso | control | -1,0554801 | 4,67824643 | 4,32E-11   | 1,69E-09   |
| TRINITY_DN22929_c0_g1_i1 | dmso | control | -1,0555282 | 1,63041371 | 0,00087078 | 0,00660282 |
| TRINITY_DN32751_c0_g1_i1 | dmso | control | -1,0574992 | 1,36688868 | 0,00052585 | 0,0043306  |
| TRINITY_DN2367_c0_g1_i1  | dmso | control | -1,0628127 | 3,36749368 | 6,17E-08   | 1,42E-06   |
| TRINITY_DN23877_c0_g1_i1 | dmso | control | -1,0629396 | 1,69373666 | 0,00040325 | 0,0034406  |
| TRINITY_DN71500_c0_g1_i1 | dmso | control | -1,0650919 | 0,10999101 | 0,01918322 | 0,0766321  |
| TRINITY_DN18431_c0_g1_i1 | dmso | control | -1,0657153 | -0,0632107 | 0,00853445 | 0,04101638 |
| TRINITY_DN20244_c0_g1_i1 | dmso | control | -1,0658645 | 2,76211048 | 2,30E-05   | 0,00028885 |
| TRINITY_DN5969_c0_g1_i1  | dmso | control | -1,0677968 | 4,51386359 | 1,75E-11   | 7,39E-10   |
| TRINITY_DN20021_c0_g1_i1 | dmso | control | -1,0692337 | 2,53519387 | 1,52E-05   | 0,00020268 |

|                          |      |         |            |            |            |            |
|--------------------------|------|---------|------------|------------|------------|------------|
| TRINITY_DN36861_c0_g1_i1 | dmso | control | -1,0699961 | 1,67947392 | 0,00056184 | 0,00457224 |
| TRINITY_DN32437_c0_g1_i1 | dmso | control | -1,0712821 | 4,89672014 | 1,47E-12   | 7,36E-11   |
| TRINITY_DN23070_c0_g1_i1 | dmso | control | -1,0745322 | 1,22151873 | 0,00190572 | 0,01258714 |
| TRINITY_DN34003_c0_g1_i1 | dmso | control | -1,0746543 | 1,27462714 | 0,00414708 | 0,02329107 |
| TRINITY_DN49114_c0_g1_i1 | dmso | control | -1,077199  | 0,487715   | 0,00353007 | 0,02063499 |
| TRINITY_DN17518_c0_g1_i1 | dmso | control | -1,0778508 | 3,48169836 | 5,10E-08   | 1,19E-06   |
| TRINITY_DN7902_c0_g1_i1  | dmso | control | -1,0804819 | 6,88737838 | 1,55E-18   | 1,53E-16   |
| TRINITY_DN8323_c0_g1_i1  | dmso | control | -1,0808741 | 5,1297958  | 1,11E-10   | 4,11E-09   |
| TRINITY_DN25385_c0_g1_i1 | dmso | control | -1,0812005 | 3,44097409 | 1,12E-07   | 2,45E-06   |
| TRINITY_DN39092_c0_g1_i1 | dmso | control | -1,0816292 | 5,44022493 | 8,17E-15   | 5,57E-13   |
| TRINITY_DN20444_c0_g1_i1 | dmso | control | -1,0825302 | 0,4573587  | 0,00424102 | 0,02370804 |
| TRINITY_DN7641_c0_g1_i1  | dmso | control | -1,0856437 | 1,88480674 | 0,00028393 | 0,00255537 |
| TRINITY_DN27363_c0_g1_i1 | dmso | control | -1,0906194 | 1,37952699 | 0,00055876 | 0,00454978 |
| TRINITY_DN6362_c0_g1_i1  | dmso | control | -1,0930603 | 5,13194953 | 2,58E-08   | 6,28E-07   |
| TRINITY_DN10665_c0_g1_i1 | dmso | control | -1,0938987 | 0,98141445 | 0,00191847 | 0,01265983 |
| TRINITY_DN66918_c0_g1_i1 | dmso | control | -1,0976869 | 2,61203471 | 2,40E-05   | 0,00029947 |
| TRINITY_DN11732_c0_g1_i1 | dmso | control | -1,0989716 | 2,32216278 | 7,35E-06   | 0,00010589 |
| TRINITY_DN25261_c0_g1_i1 | dmso | control | -1,1035662 | 0,27407117 | 0,00929939 | 0,04386993 |
| TRINITY_DN36602_c0_g1_i1 | dmso | control | -1,1062609 | 1,22446613 | 0,00162445 | 0,01106329 |
| TRINITY_DN23708_c0_g1_i1 | dmso | control | -1,1086365 | 2,47493711 | 5,94E-06   | 8,73E-05   |
| TRINITY_DN42298_c0_g1_i1 | dmso | control | -1,1092567 | 0,58510661 | 0,0019248  | 0,01267739 |
| TRINITY_DN6472_c0_g1_i1  | dmso | control | -1,1130483 | 3,85663994 | 1,12E-06   | 1,94E-05   |
| TRINITY_DN18380_c0_g1_i1 | dmso | control | -1,1133396 | 2,33503633 | 2,42E-05   | 0,0003025  |
| TRINITY_DN8800_c0_g1_i1  | dmso | control | -1,118451  | 5,57969098 | 1,58E-16   | 1,28E-14   |
| TRINITY_DN34358_c0_g1_i1 | dmso | control | -1,119048  | 2,10010678 | 0,00216969 | 0,01396695 |
| TRINITY_DN7794_c0_g1_i1  | dmso | control | -1,121024  | 2,45658072 | 3,95E-05   | 0,00046566 |
| TRINITY_DN23868_c0_g1_i1 | dmso | control | -1,1214443 | 3,1153617  | 2,97E-06   | 4,64E-05   |
| TRINITY_DN14622_c0_g1_i1 | dmso | control | -1,1254819 | 1,32272945 | 0,00214826 | 0,01387195 |
| TRINITY_DN44762_c0_g1_i1 | dmso | control | -1,1255328 | 1,423768   | 0,00020168 | 0,00189793 |
| TRINITY_DN34662_c0_g1_i1 | dmso | control | -1,1293876 | 1,16477864 | 0,00035768 | 0,00311222 |
| TRINITY_DN63105_c0_g1_i1 | dmso | control | -1,129647  | -0,1444072 | 0,00799499 | 0,03903834 |

|                          |      |         |            |            |            |            |
|--------------------------|------|---------|------------|------------|------------|------------|
| TRINITY_DN17904_c0_g1_i1 | dmso | control | -1,1322186 | 5,98323778 | 1,88E-17   | 1,68E-15   |
| TRINITY_DN34228_c0_g1_i1 | dmso | control | -1,1355309 | 1,52158165 | 0,00207836 | 0,01348693 |
| TRINITY_DN47169_c0_g1_i1 | dmso | control | -1,1377741 | 0,94697977 | 0,00190259 | 0,01257799 |
| TRINITY_DN14668_c0_g1_i1 | dmso | control | -1,1384535 | 2,29601881 | 6,59E-06   | 9,55E-05   |
| TRINITY_DN40157_c0_g1_i1 | dmso | control | -1,1406318 | 2,91300088 | 3,73E-07   | 7,18E-06   |
| TRINITY_DN5844_c0_g1_i1  | dmso | control | -1,1410038 | 5,24596564 | 7,90E-14   | 4,70E-12   |
| TRINITY_DN17184_c0_g1_i1 | dmso | control | -1,1410806 | 1,72913544 | 0,00596426 | 0,030946   |
| TRINITY_DN34181_c0_g1_i1 | dmso | control | -1,1436812 | 1,55868697 | 9,39E-05   | 0,00099181 |
| TRINITY_DN21855_c0_g1_i1 | dmso | control | -1,1437164 | 2,07111134 | 1,54E-05   | 0,00020484 |
| TRINITY_DN38891_c0_g1_i1 | dmso | control | -1,1456419 | 1,91117305 | 0,00013715 | 0,00137296 |
| TRINITY_DN38075_c0_g1_i1 | dmso | control | -1,1509918 | 3,74128385 | 1,86E-08   | 4,66E-07   |
| TRINITY_DN8499_c0_g1_i1  | dmso | control | -1,1539206 | 0,90886625 | 0,00268612 | 0,01653454 |
| TRINITY_DN14449_c0_g1_i1 | dmso | control | -1,1564322 | 4,48383561 | 4,11E-13   | 2,25E-11   |
| TRINITY_DN3725_c0_g1_i1  | dmso | control | -1,1589099 | 2,15759193 | 0,00026266 | 0,00238623 |
| TRINITY_DN5213_c0_g1_i1  | dmso | control | -1,1598993 | 4,30900141 | 2,11E-09   | 6,30E-08   |
| TRINITY_DN9362_c0_g1_i1  | dmso | control | -1,1614901 | 2,43903018 | 2,02E-05   | 0,00025854 |
| TRINITY_DN27861_c0_g1_i1 | dmso | control | -1,16163   | 1,14147327 | 0,00219581 | 0,01409086 |
| TRINITY_DN24365_c0_g1_i1 | dmso | control | -1,1640821 | 2,49862434 | 6,58E-06   | 9,55E-05   |
| TRINITY_DN40253_c0_g1_i1 | dmso | control | -1,1657389 | 2,72907731 | 3,54E-05   | 0,00042276 |
| TRINITY_DN35931_c0_g1_i1 | dmso | control | -1,1658353 | 2,25654634 | 8,91E-05   | 0,00094564 |
| TRINITY_DN21097_c0_g1_i1 | dmso | control | -1,1696523 | 1,0430773  | 0,00131665 | 0,00934598 |
| TRINITY_DN15217_c0_g1_i1 | dmso | control | -1,1700195 | 2,96549027 | 1,54E-07   | 3,28E-06   |
| TRINITY_DN10129_c0_g1_i1 | dmso | control | -1,1703434 | 1,07254775 | 0,00038201 | 0,0032867  |
| TRINITY_DN30879_c0_g1_i1 | dmso | control | -1,1723583 | 1,64743769 | 4,05E-05   | 0,00047506 |
| TRINITY_DN20068_c0_g1_i1 | dmso | control | -1,1723816 | 3,49578767 | 2,71E-09   | 7,91E-08   |
| TRINITY_DN19378_c0_g1_i1 | dmso | control | -1,1726292 | 6,25534446 | 8,56E-14   | 5,05E-12   |
| TRINITY_DN1703_c0_g1_i1  | dmso | control | -1,172696  | 8,5741493  | 2,20E-26   | 4,41E-24   |
| TRINITY_DN22419_c0_g1_i1 | dmso | control | -1,1741311 | 2,56190039 | 4,41E-05   | 0,00051366 |
| TRINITY_DN632_c0_g1_i1   | dmso | control | -1,1776586 | 5,23301667 | 3,39E-12   | 1,58E-10   |
| TRINITY_DN9220_c0_g1_i1  | dmso | control | -1,1796808 | 0,64064748 | 0,00268186 | 0,01652    |
| TRINITY_DN78653_c0_g1_i1 | dmso | control | -1,1800931 | 0,04973895 | 0,00425758 | 0,02378218 |

|                          |      |         |            |            |            |            |
|--------------------------|------|---------|------------|------------|------------|------------|
| TRINITY_DN20204_c0_g1_i1 | dmso | control | -1,1811813 | 3,08628327 | 2,23E-08   | 5,50E-07   |
| TRINITY_DN44194_c0_g1_i1 | dmso | control | -1,185106  | 2,19873028 | 1,51E-05   | 0,00020069 |
| TRINITY_DN12933_c0_g1_i1 | dmso | control | -1,1865603 | 4,49080229 | 4,87E-07   | 9,15E-06   |
| TRINITY_DN52438_c0_g1_i1 | dmso | control | -1,1869726 | 0,38448472 | 0,00160381 | 0,01096404 |
| TRINITY_DN38327_c0_g1_i1 | dmso | control | -1,1872274 | 0,50556641 | 0,00136663 | 0,00962037 |
| TRINITY_DN14875_c0_g1_i1 | dmso | control | -1,1889041 | 2,61834444 | 5,31E-07   | 9,89E-06   |
| TRINITY_DN36681_c0_g1_i1 | dmso | control | -1,189895  | 3,94686205 | 2,81E-09   | 8,12E-08   |
| TRINITY_DN44208_c0_g1_i1 | dmso | control | -1,1899813 | 1,05768845 | 0,00164799 | 0,0111878  |
| TRINITY_DN26502_c0_g1_i1 | dmso | control | -1,1908015 | 0,60867126 | 0,00108366 | 0,00792986 |
| TRINITY_DN32394_c0_g1_i1 | dmso | control | -1,1941607 | 2,85190991 | 0,00043384 | 0,00366478 |
| TRINITY_DN20116_c0_g1_i1 | dmso | control | -1,2009943 | 2,08482499 | 2,78E-05   | 0,00034181 |
| TRINITY_DN21669_c0_g1_i1 | dmso | control | -1,2065253 | 2,65993728 | 1,57E-07   | 3,31E-06   |
| TRINITY_DN10053_c0_g1_i1 | dmso | control | -1,2075176 | 0,18144855 | 0,00249672 | 0,01562611 |
| TRINITY_DN40827_c0_g1_i1 | dmso | control | -1,2088982 | 1,66413788 | 0,00557616 | 0,02937548 |
| TRINITY_DN21117_c0_g1_i1 | dmso | control | -1,2096748 | 2,53124364 | 1,64E-06   | 2,75E-05   |
| TRINITY_DN15609_c0_g1_i1 | dmso | control | -1,2118196 | 2,91592062 | 2,09E-05   | 0,00026631 |
| TRINITY_DN23232_c0_g1_i1 | dmso | control | -1,2152779 | 1,53375424 | 0,00015074 | 0,00148432 |
| TRINITY_DN11929_c0_g1_i1 | dmso | control | -1,2172484 | 4,4941863  | 1,54E-12   | 7,66E-11   |
| TRINITY_DN6305_c0_g1_i1  | dmso | control | -1,2237134 | 2,37816248 | 9,77E-05   | 0,00102683 |
| TRINITY_DN34555_c0_g1_i1 | dmso | control | -1,2256007 | 2,98531899 | 1,28E-08   | 3,32E-07   |
| TRINITY_DN20332_c0_g1_i1 | dmso | control | -1,2268685 | 3,32162898 | 9,18E-07   | 1,62E-05   |
| TRINITY_DN13764_c0_g1_i1 | dmso | control | -1,2315851 | 3,53134792 | 8,82E-10   | 2,79E-08   |
| TRINITY_DN14186_c0_g1_i1 | dmso | control | -1,2334088 | 1,05258753 | 0,00053495 | 0,00439552 |
| TRINITY_DN51228_c0_g1_i1 | dmso | control | -1,2337011 | 0,47978911 | 0,00092377 | 0,0069089  |
| TRINITY_DN1633_c0_g1_i1  | dmso | control | -1,2368213 | 3,68862248 | 2,40E-08   | 5,91E-07   |
| TRINITY_DN18895_c0_g1_i1 | dmso | control | -1,2381545 | 2,67697933 | 5,63E-07   | 1,04E-05   |
| TRINITY_DN29450_c0_g1_i1 | dmso | control | -1,2400856 | -0,3411239 | 0,0057164  | 0,02999395 |
| TRINITY_DN2009_c0_g1_i1  | dmso | control | -1,2433458 | 3,4559613  | 1,15E-08   | 3,02E-07   |
| TRINITY_DN11530_c0_g1_i1 | dmso | control | -1,2434727 | 4,64578042 | 5,82E-08   | 1,35E-06   |
| TRINITY_DN24467_c0_g1_i1 | dmso | control | -1,2447073 | 0,90183338 | 0,00016208 | 0,00157764 |
| TRINITY_DN64354_c0_g1_i1 | dmso | control | -1,2450065 | 2,60621686 | 1,43E-07   | 3,06E-06   |



|                          |      |         |            |            |            |            |
|--------------------------|------|---------|------------|------------|------------|------------|
| TRINITY_DN26375_c0_g1_i1 | dmso | control | -1,2450301 | 0,89728029 | 0,00068276 | 0,00539226 |
| TRINITY_DN26018_c0_g1_i1 | dmso | control | -1,2459618 | 1,94612146 | 0,00068124 | 0,00538618 |
| TRINITY_DN13407_c0_g1_i1 | dmso | control | -1,2523096 | 3,06908571 | 1,23E-06   | 2,11E-05   |
| TRINITY_DN24637_c0_g1_i1 | dmso | control | -1,2565733 | 0,41493663 | 0,0029511  | 0,01785919 |
| TRINITY_DN42338_c0_g1_i1 | dmso | control | -1,2567841 | 0,889608   | 0,00018504 | 0,00176661 |
| TRINITY_DN920_c0_g1_i1   | dmso | control | -1,2609613 | 4,86138767 | 1,70E-15   | 1,21E-13   |
| TRINITY_DN49379_c0_g1_i1 | dmso | control | -1,263401  | -0,1009832 | 0,00265195 | 0,01637771 |
| TRINITY_DN20693_c0_g1_i1 | dmso | control | -1,2634479 | 4,74239377 | 2,47E-11   | 1,01E-09   |
| TRINITY_DN3962_c0_g1_i1  | dmso | control | -1,2639695 | 0,867899   | 0,00030038 | 0,00268501 |
| TRINITY_DN11553_c0_g1_i1 | dmso | control | -1,2647849 | 2,54789888 | 3,17E-07   | 6,21E-06   |
| TRINITY_DN24356_c0_g1_i1 | dmso | control | -1,2650525 | 1,85626355 | 7,66E-06   | 0,00011016 |
| TRINITY_DN15384_c0_g1_i1 | dmso | control | -1,2693985 | 0,50610273 | 0,00076347 | 0,00591969 |
| TRINITY_DN18306_c0_g1_i1 | dmso | control | -1,2700985 | 1,041679   | 0,00015062 | 0,00148407 |
| TRINITY_DN42389_c0_g1_i1 | dmso | control | -1,2718955 | 0,18048605 | 0,00161871 | 0,01104624 |
| TRINITY_DN44929_c0_g1_i1 | dmso | control | -1,2721275 | 0,29170771 | 0,00106438 | 0,0078284  |
| TRINITY_DN1909_c0_g1_i1  | dmso | control | -1,2727149 | 3,62476764 | 1,41E-10   | 5,10E-09   |
| TRINITY_DN13284_c0_g1_i1 | dmso | control | -1,2727632 | 1,20785033 | 5,11E-05   | 0,00058379 |
| TRINITY_DN5194_c0_g1_i1  | dmso | control | -1,274906  | 4,51984302 | 1,75E-14   | 1,13E-12   |
| TRINITY_DN4226_c0_g1_i1  | dmso | control | -1,2795159 | -0,0436912 | 0,00334134 | 0,01971636 |
| TRINITY_DN38723_c0_g1_i1 | dmso | control | -1,2835596 | 0,82287537 | 0,01197612 | 0,05354228 |
| TRINITY_DN28712_c0_g1_i1 | dmso | control | -1,2843845 | 0,01246673 | 0,00395608 | 0,02249826 |
| TRINITY_DN9757_c0_g1_i1  | dmso | control | -1,285365  | 0,93471349 | 0,02154299 | 0,08371039 |
| TRINITY_DN28023_c0_g1_i1 | dmso | control | -1,2873858 | 4,06432605 | 8,11E-10   | 2,59E-08   |
| TRINITY_DN16732_c0_g1_i1 | dmso | control | -1,2901793 | 3,90407938 | 2,02E-06   | 3,29E-05   |
| TRINITY_DN31015_c0_g1_i1 | dmso | control | -1,2904175 | 0,12581046 | 0,00157654 | 0,01081248 |
| TRINITY_DN29221_c0_g1_i1 | dmso | control | -1,2931045 | 1,89611023 | 3,74E-06   | 5,70E-05   |
| TRINITY_DN3251_c0_g1_i1  | dmso | control | -1,2931305 | 4,16591617 | 3,86E-12   | 1,78E-10   |
| TRINITY_DN2732_c0_g1_i1  | dmso | control | -1,2941534 | 3,61514114 | 1,21E-11   | 5,18E-10   |
| TRINITY_DN21343_c0_g1_i1 | dmso | control | -1,2949192 | 0,19557271 | 0,0008838  | 0,00668053 |
| TRINITY_DN33614_c0_g1_i1 | dmso | control | -1,2970665 | 1,84000279 | 2,75E-06   | 4,36E-05   |
| TRINITY_DN17391_c0_g1_i1 | dmso | control | -1,2978582 | -0,2604978 | 0,00322325 | 0,01922371 |

|                          |      |         |            |            |            |            |
|--------------------------|------|---------|------------|------------|------------|------------|
| TRINITY_DN34088_c0_g1_i1 | dmso | control | -1,3002558 | 0,77821142 | 0,00138458 | 0,00971357 |
| TRINITY_DN18205_c0_g1_i1 | dmso | control | -1,3046564 | 0,25373023 | 0,00394171 | 0,02244302 |
| TRINITY_DN42498_c0_g1_i1 | dmso | control | -1,3047769 | 0,30739098 | 0,0018217  | 0,01214325 |
| TRINITY_DN2467_c0_g1_i1  | dmso | control | -1,3049103 | 2,25724639 | 4,09E-07   | 7,86E-06   |
| TRINITY_DN19892_c0_g1_i1 | dmso | control | -1,307004  | 2,14144301 | 6,12E-07   | 1,12E-05   |
| TRINITY_DN40496_c0_g1_i1 | dmso | control | -1,309849  | 1,89347327 | 2,00E-06   | 3,25E-05   |
| TRINITY_DN40775_c0_g1_i1 | dmso | control | -1,3105916 | 0,28575983 | 0,00194723 | 0,01277374 |
| TRINITY_DN25425_c0_g1_i1 | dmso | control | -1,3165539 | 3,09203649 | 2,69E-10   | 9,31E-09   |
| TRINITY_DN44303_c0_g1_i1 | dmso | control | -1,3326325 | 2,45129955 | 2,98E-07   | 5,88E-06   |
| TRINITY_DN42653_c0_g1_i1 | dmso | control | -1,3331527 | 2,49283174 | 8,11E-08   | 1,82E-06   |
| TRINITY_DN54273_c0_g1_i1 | dmso | control | -1,3338435 | -0,2463506 | 0,00348062 | 0,02040486 |
| TRINITY_DN22918_c0_g1_i1 | dmso | control | -1,338901  | 1,29178987 | 1,66E-05   | 0,00021823 |
| TRINITY_DN16161_c0_g1_i1 | dmso | control | -1,3404676 | 3,19297021 | 1,70E-10   | 6,06E-09   |
| TRINITY_DN53219_c0_g1_i1 | dmso | control | -1,3439087 | 1,62135431 | 3,48E-06   | 5,33E-05   |
| TRINITY_DN26190_c0_g1_i1 | dmso | control | -1,346317  | 0,35997104 | 0,00048973 | 0,00406092 |
| TRINITY_DN18044_c0_g1_i1 | dmso | control | -1,3539846 | 0,17535562 | 0,00283153 | 0,01726526 |
| TRINITY_DN33111_c0_g1_i1 | dmso | control | -1,3607207 | 2,01785313 | 2,89E-06   | 4,54E-05   |
| TRINITY_DN47270_c0_g1_i1 | dmso | control | -1,3625273 | 1,32160452 | 2,86E-05   | 0,00034997 |
| TRINITY_DN26654_c0_g1_i1 | dmso | control | -1,3625771 | -0,1708037 | 0,00137482 | 0,00966385 |
| TRINITY_DN9320_c0_g1_i1  | dmso | control | -1,3653259 | 3,97811699 | 1,42E-12   | 7,18E-11   |
| TRINITY_DN12614_c0_g1_i1 | dmso | control | -1,3656687 | 2,91041916 | 8,54E-08   | 1,91E-06   |
| TRINITY_DN10168_c0_g1_i1 | dmso | control | -1,3695618 | 0,47570787 | 0,00023723 | 0,00218771 |
| TRINITY_DN27973_c0_g1_i1 | dmso | control | -1,3697852 | 1,63060811 | 3,82E-06   | 5,80E-05   |
| TRINITY_DN21296_c0_g1_i1 | dmso | control | -1,3699636 | 4,01288447 | 2,57E-13   | 1,44E-11   |
| TRINITY_DN31436_c0_g1_i1 | dmso | control | -1,3700628 | 0,88469425 | 0,00018728 | 0,00178332 |
| TRINITY_DN24957_c0_g1_i1 | dmso | control | -1,3750406 | 0,56367876 | 0,00018114 | 0,00173169 |
| TRINITY_DN2657_c0_g1_i1  | dmso | control | -1,3758724 | 4,57932416 | 1,03E-12   | 5,38E-11   |
| TRINITY_DN3235_c0_g1_i1  | dmso | control | -1,3772084 | 1,97093098 | 2,17E-07   | 4,44E-06   |
| TRINITY_DN33067_c0_g1_i1 | dmso | control | -1,3866591 | 5,54365599 | 8,55E-25   | 1,54E-22   |
| TRINITY_DN41855_c0_g1_i1 | dmso | control | -1,3875131 | 0,90482994 | 0,00042711 | 0,00361642 |
| TRINITY_DN7513_c0_g1_i1  | dmso | control | -1,3912662 | 2,45891325 | 4,37E-08   | 1,03E-06   |

|                          |      |         |            |            |            |            |
|--------------------------|------|---------|------------|------------|------------|------------|
| TRINITY_DN26892_c0_g1_i1 | dmso | control | -1,3933533 | 0,96311321 | 6,62E-05   | 0,00073422 |
| TRINITY_DN31039_c0_g1_i1 | dmso | control | -1,3955954 | -0,3401752 | 0,00511533 | 0,02742797 |
| TRINITY_DN23492_c0_g1_i1 | dmso | control | -1,4038463 | 2,46117096 | 2,29E-08   | 5,63E-07   |
| TRINITY_DN32042_c0_g1_i1 | dmso | control | -1,4062302 | 1,75791667 | 2,97E-06   | 4,65E-05   |
| TRINITY_DN7177_c0_g1_i1  | dmso | control | -1,4185538 | 2,62403579 | 1,07E-09   | 3,32E-08   |
| TRINITY_DN23325_c0_g1_i1 | dmso | control | -1,4188112 | 2,3851957  | 9,74E-09   | 2,58E-07   |
| TRINITY_DN24275_c0_g1_i1 | dmso | control | -1,4230994 | 0,5780886  | 0,00146604 | 0,01019101 |
| TRINITY_DN5247_c0_g1_i1  | dmso | control | -1,4250667 | 6,52089629 | 5,95E-32   | 1,95E-29   |
| TRINITY_DN34197_c0_g1_i1 | dmso | control | -1,427558  | 0,09246115 | 0,00717266 | 0,03576435 |
| TRINITY_DN20578_c0_g1_i1 | dmso | control | -1,4300559 | 2,5807925  | 1,74E-09   | 5,22E-08   |
| TRINITY_DN29953_c0_g1_i1 | dmso | control | -1,4349292 | 2,19517334 | 2,99E-08   | 7,20E-07   |
| TRINITY_DN3082_c0_g1_i1  | dmso | control | -1,4482842 | 4,07989838 | 3,93E-16   | 3,10E-14   |
| TRINITY_DN36460_c0_g1_i1 | dmso | control | -1,4521235 | 1,29871376 | 0,00012731 | 0,00128315 |
| TRINITY_DN21580_c0_g1_i1 | dmso | control | -1,4551705 | 1,76109527 | 3,50E-06   | 5,36E-05   |
| TRINITY_DN19412_c0_g1_i1 | dmso | control | -1,4602072 | 3,80454384 | 1,16E-13   | 6,73E-12   |
| TRINITY_DN5157_c0_g1_i1  | dmso | control | -1,4607631 | 4,54443597 | 1,10E-14   | 7,35E-13   |
| TRINITY_DN32750_c0_g1_i1 | dmso | control | -1,4621853 | 3,59664134 | 4,40E-14   | 2,69E-12   |
| TRINITY_DN17374_c0_g1_i1 | dmso | control | -1,4625003 | 0,5109203  | 7,24E-05   | 0,00079391 |
| TRINITY_DN8787_c0_g1_i1  | dmso | control | -1,4627936 | 4,45294029 | 3,83E-10   | 1,29E-08   |
| TRINITY_DN38031_c0_g1_i1 | dmso | control | -1,4632321 | 1,65775208 | 5,12E-07   | 9,56E-06   |
| TRINITY_DN17049_c0_g1_i1 | dmso | control | -1,4632818 | 1,31245132 | 0,00055589 | 0,00453148 |
| TRINITY_DN14507_c0_g1_i1 | dmso | control | -1,4677434 | 1,35611357 | 1,32E-05   | 0,00017926 |
| TRINITY_DN25884_c0_g1_i1 | dmso | control | -1,4695278 | 2,31078468 | 1,29E-08   | 3,34E-07   |
| TRINITY_DN4576_c0_g1_i1  | dmso | control | -1,4733505 | 2,92167341 | 2,31E-11   | 9,48E-10   |
| TRINITY_DN33631_c0_g1_i1 | dmso | control | -1,4783021 | 1,03119973 | 4,20E-05   | 0,00049164 |
| TRINITY_DN24163_c0_g1_i1 | dmso | control | -1,4839827 | 3,166919   | 3,13E-09   | 8,89E-08   |
| TRINITY_DN24644_c0_g1_i1 | dmso | control | -1,4927291 | 0,10120051 | 0,00034347 | 0,00301057 |
| TRINITY_DN52045_c0_g1_i1 | dmso | control | -1,4928878 | 4,53262464 | 1,43E-12   | 7,19E-11   |
| TRINITY_DN38330_c0_g1_i1 | dmso | control | -1,5007974 | 0,44294274 | 6,30E-05   | 0,00070443 |
| TRINITY_DN51212_c0_g1_i1 | dmso | control | -1,5186437 | 4,22822755 | 1,16E-09   | 3,58E-08   |
| TRINITY_DN66751_c0_g1_i1 | dmso | control | -1,5193439 | 0,02199912 | 0,00027864 | 0,00251559 |

|                          |      |         |            |            |            |            |
|--------------------------|------|---------|------------|------------|------------|------------|
| TRINITY_DN21941_c0_g1_i1 | dmso | control | -1,5207826 | 4,66111213 | 1,46E-14   | 9,51E-13   |
| TRINITY_DN56695_c0_g1_i1 | dmso | control | -1,5273175 | 2,50716906 | 1,46E-07   | 3,13E-06   |
| TRINITY_DN8667_c0_g1_i1  | dmso | control | -1,5303457 | 0,64458616 | 2,63E-05   | 0,0003257  |
| TRINITY_DN21817_c0_g1_i1 | dmso | control | -1,5305839 | 1,42276746 | 2,31E-06   | 3,71E-05   |
| TRINITY_DN69507_c0_g1_i1 | dmso | control | -1,5417776 | -0,3095677 | 0,00049483 | 0,00409614 |
| TRINITY_DN24007_c0_g1_i1 | dmso | control | -1,5431307 | 1,44221009 | 5,05E-06   | 7,55E-05   |
| TRINITY_DN26898_c0_g1_i1 | dmso | control | -1,5617081 | -0,2467122 | 0,00053732 | 0,00441003 |
| TRINITY_DN6790_c0_g1_i1  | dmso | control | -1,563797  | 5,51726997 | 2,22E-29   | 5,93E-27   |
| TRINITY_DN28277_c0_g1_i1 | dmso | control | -1,5888189 | -0,0579581 | 0,00039732 | 0,00339804 |
| TRINITY_DN7720_c0_g1_i1  | dmso | control | -1,5897035 | 3,36555946 | 9,46E-15   | 6,42E-13   |
| TRINITY_DN47972_c0_g1_i1 | dmso | control | -1,5935952 | 2,87165436 | 7,25E-11   | 2,73E-09   |
| TRINITY_DN777_c0_g1_i1   | dmso | control | -1,5943813 | 7,0430169  | 2,66E-08   | 6,45E-07   |
| TRINITY_DN25283_c0_g1_i1 | dmso | control | -1,6039566 | 0,64585088 | 1,39E-05   | 0,0001876  |
| TRINITY_DN9185_c0_g1_i1  | dmso | control | -1,6059661 | 1,4616139  | 2,07E-05   | 0,00026406 |
| TRINITY_DN36106_c0_g1_i1 | dmso | control | -1,6171761 | -0,0987704 | 0,00013727 | 0,00137315 |
| TRINITY_DN49374_c0_g1_i1 | dmso | control | -1,6190368 | 3,35140889 | 1,11E-11   | 4,78E-10   |
| TRINITY_DN43949_c0_g1_i1 | dmso | control | -1,622843  | 0,05356366 | 0,0001022  | 0,00106364 |
| TRINITY_DN10325_c0_g1_i1 | dmso | control | -1,6347514 | -0,0919707 | 0,00037491 | 0,00323705 |
| TRINITY_DN14828_c0_g1_i1 | dmso | control | -1,6431584 | 2,39675378 | 4,30E-11   | 1,69E-09   |
| TRINITY_DN34207_c0_g1_i1 | dmso | control | -1,6469036 | 1,46721684 | 8,12E-07   | 1,45E-05   |
| TRINITY_DN13639_c0_g1_i1 | dmso | control | -1,6486355 | 4,29830083 | 6,13E-19   | 6,47E-17   |
| TRINITY_DN38211_c0_g1_i1 | dmso | control | -1,6556323 | 1,25317292 | 2,04E-07   | 4,21E-06   |
| TRINITY_DN21370_c0_g1_i1 | dmso | control | -1,6583692 | 1,30893496 | 3,07E-07   | 6,03E-06   |
| TRINITY_DN26720_c0_g1_i1 | dmso | control | -1,6645518 | -0,3400056 | 0,00048178 | 0,00400652 |
| TRINITY_DN13126_c0_g1_i1 | dmso | control | -1,6677675 | 3,1874759  | 1,14E-15   | 8,37E-14   |
| TRINITY_DN34341_c0_g1_i1 | dmso | control | -1,6792378 | 1,36508697 | 0,00015648 | 0,00153034 |
| TRINITY_DN23139_c0_g1_i1 | dmso | control | -1,6836103 | 3,53583517 | 2,63E-14   | 1,67E-12   |
| TRINITY_DN22105_c0_g1_i1 | dmso | control | -1,7094557 | 0,88952118 | 5,89E-07   | 1,09E-05   |
| TRINITY_DN47302_c0_g1_i1 | dmso | control | -1,722513  | -0,3758747 | 0,00028882 | 0,00259453 |
| TRINITY_DN6104_c0_g1_i1  | dmso | control | -1,7275231 | 5,045287   | 3,09E-31   | 9,70E-29   |
| TRINITY_DN17585_c0_g1_i1 | dmso | control | -1,7356953 | 3,76808628 | 8,03E-09   | 2,14E-07   |

|                          |      |         |            |            |            |            |
|--------------------------|------|---------|------------|------------|------------|------------|
| TRINITY_DN27987_c0_g1_i1 | dmso | control | -1,7599448 | 0,95595183 | 3,98E-07   | 7,65E-06   |
| TRINITY_DN10002_c0_g1_i1 | dmso | control | -1,7615785 | 3,13145063 | 3,33E-14   | 2,08E-12   |
| TRINITY_DN14758_c0_g1_i1 | dmso | control | -1,7652247 | 1,53702245 | 2,19E-07   | 4,46E-06   |
| TRINITY_DN23601_c0_g1_i1 | dmso | control | -1,7770613 | 5,86211198 | 1,78E-36   | 7,78E-34   |
| TRINITY_DN3171_c0_g1_i1  | dmso | control | -1,778011  | 2,20806683 | 1,08E-11   | 4,69E-10   |
| TRINITY_DN67948_c0_g1_i1 | dmso | control | -1,7877453 | 0,25723549 | 7,96E-06   | 0,00011376 |
| TRINITY_DN14158_c0_g1_i1 | dmso | control | -1,8003706 | 0,83736957 | 7,38E-07   | 1,33E-05   |
| TRINITY_DN21721_c0_g1_i1 | dmso | control | -1,8160521 | 2,0771376  | 2,57E-11   | 1,04E-09   |
| TRINITY_DN1421_c0_g1_i1  | dmso | control | -1,82457   | 6,66278009 | 1,55E-52   | 1,50E-49   |
| TRINITY_DN17393_c0_g1_i1 | dmso | control | -1,8252759 | -0,3727598 | 8,69E-05   | 0,00092314 |
| TRINITY_DN10090_c0_g1_i1 | dmso | control | -1,8292768 | 2,99032469 | 2,96E-13   | 1,65E-11   |
| TRINITY_DN38048_c0_g1_i1 | dmso | control | -1,8306881 | -0,2887908 | 0,00021172 | 0,00197694 |
| TRINITY_DN9375_c0_g1_i1  | dmso | control | -1,8382497 | 1,36634084 | 2,08E-08   | 5,15E-07   |
| TRINITY_DN24117_c0_g1_i1 | dmso | control | -1,8454749 | 2,69158098 | 1,64E-12   | 8,04E-11   |
| TRINITY_DN23039_c0_g1_i1 | dmso | control | -1,8535922 | 1,52078583 | 7,65E-09   | 2,05E-07   |
| TRINITY_DN44637_c0_g1_i1 | dmso | control | -1,8549128 | -0,2766318 | 3,34E-05   | 0,00040049 |
| TRINITY_DN28350_c0_g1_i1 | dmso | control | -1,8580744 | -0,0311456 | 1,36E-05   | 0,00018423 |
| TRINITY_DN8795_c0_g1_i1  | dmso | control | -1,8691283 | 4,68504762 | 1,42E-15   | 1,02E-13   |
| TRINITY_DN14858_c0_g1_i1 | dmso | control | -1,8735625 | 4,62708281 | 2,10E-23   | 3,28E-21   |
| TRINITY_DN64516_c0_g1_i1 | dmso | control | -1,8785093 | 0,83985123 | 1,30E-07   | 2,83E-06   |
| TRINITY_DN74971_c0_g1_i1 | dmso | control | -1,886623  | 0,79797118 | 2,02E-06   | 3,29E-05   |
| TRINITY_DN5696_c0_g1_i1  | dmso | control | -1,9031183 | 5,9054057  | 1,70E-43   | 1,02E-40   |
| TRINITY_DN12456_c0_g1_i1 | dmso | control | -1,9046605 | 4,60007946 | 3,25E-13   | 1,80E-11   |
| TRINITY_DN9421_c0_g1_i1  | dmso | control | -1,9075127 | -0,3062754 | 4,73E-05   | 0,00054658 |
| TRINITY_DN50846_c0_g1_i1 | dmso | control | -1,910513  | 3,6768515  | 1,03E-21   | 1,40E-19   |
| TRINITY_DN21153_c0_g1_i1 | dmso | control | -1,9114101 | 2,59613469 | 1,06E-14   | 7,14E-13   |
| TRINITY_DN59235_c0_g1_i1 | dmso | control | -1,9136525 | 0,59764242 | 3,34E-07   | 6,52E-06   |
| TRINITY_DN2635_c0_g1_i1  | dmso | control | -1,9256854 | 4,56902315 | 3,77E-26   | 7,35E-24   |
| TRINITY_DN21437_c0_g1_i1 | dmso | control | -1,9283837 | 5,53637092 | 4,64E-44   | 3,05E-41   |
| TRINITY_DN12754_c0_g1_i1 | dmso | control | -1,9342018 | 2,14354786 | 6,59E-13   | 3,53E-11   |
| TRINITY_DN19800_c0_g1_i1 | dmso | control | -1,9375036 | 2,70332073 | 7,84E-16   | 5,96E-14   |

|                          |      |         |            |            |          |            |
|--------------------------|------|---------|------------|------------|----------|------------|
| TRINITY_DN25756_c0_g1_i1 | dmso | control | -1,9418953 | 0,37241726 | 7,99E-07 | 1,43E-05   |
| TRINITY_DN3237_c0_g1_i1  | dmso | control | -1,9498514 | 0,33295662 | 1,01E-06 | 1,76E-05   |
| TRINITY_DN7407_c0_g1_i1  | dmso | control | -1,9811126 | 1,00609724 | 1,28E-08 | 3,32E-07   |
| TRINITY_DN31400_c0_g1_i1 | dmso | control | -1,9811489 | 0,00784221 | 1,46E-05 | 0,00019615 |
| TRINITY_DN78228_c0_g1_i1 | dmso | control | -1,9972774 | 2,90527806 | 2,80E-09 | 8,12E-08   |
| TRINITY_DN24021_c0_g1_i1 | dmso | control | -2,0018185 | 1,41879119 | 2,19E-09 | 6,51E-08   |
| TRINITY_DN10365_c0_g1_i1 | dmso | control | -2,0190255 | 3,3804062  | 1,53E-17 | 1,39E-15   |
| TRINITY_DN18557_c0_g1_i1 | dmso | control | -2,0556947 | 1,26340794 | 5,84E-08 | 1,35E-06   |
| TRINITY_DN25169_c0_g1_i1 | dmso | control | -2,060068  | 1,52387416 | 1,48E-08 | 3,79E-07   |
| TRINITY_DN35520_c0_g1_i1 | dmso | control | -2,0767919 | 2,38155429 | 9,37E-16 | 7,01E-14   |
| TRINITY_DN39799_c0_g1_i1 | dmso | control | -2,0849527 | 2,9115725  | 4,95E-19 | 5,30E-17   |
| TRINITY_DN37691_c0_g1_i1 | dmso | control | -2,1368113 | 3,99412952 | 2,95E-29 | 7,75E-27   |
| TRINITY_DN15325_c0_g1_i1 | dmso | control | -2,142626  | 3,100655   | 2,44E-21 | 3,15E-19   |
| TRINITY_DN25125_c0_g1_i1 | dmso | control | -2,1528755 | 1,87102527 | 2,12E-11 | 8,80E-10   |
| TRINITY_DN33085_c0_g1_i1 | dmso | control | -2,1593497 | 1,12070016 | 1,30E-10 | 4,72E-09   |
| TRINITY_DN39169_c0_g1_i1 | dmso | control | -2,1601665 | 1,5489538  | 2,80E-12 | 1,33E-10   |
| TRINITY_DN8748_c0_g1_i1  | dmso | control | -2,2105711 | 7,90730979 | 2,25E-80 | 1,63E-76   |
| TRINITY_DN19749_c0_g1_i1 | dmso | control | -2,2210251 | 2,93646122 | 7,76E-21 | 9,75E-19   |
| TRINITY_DN59079_c0_g1_i1 | dmso | control | -2,221818  | 0,18867934 | 2,53E-07 | 5,09E-06   |
| TRINITY_DN23661_c0_g1_i1 | dmso | control | -2,2391755 | 2,02125672 | 1,24E-09 | 3,79E-08   |
| TRINITY_DN24388_c0_g1_i1 | dmso | control | -2,2411245 | 2,34614062 | 2,58E-12 | 1,23E-10   |
| TRINITY_DN44378_c0_g1_i1 | dmso | control | -2,2524207 | 2,24098605 | 1,93E-12 | 9,40E-11   |
| TRINITY_DN56549_c0_g1_i1 | dmso | control | -2,264294  | -0,2627484 | 3,37E-06 | 5,18E-05   |
| TRINITY_DN32283_c0_g1_i1 | dmso | control | -2,2784105 | 1,41388213 | 5,53E-12 | 2,47E-10   |
| TRINITY_DN17761_c0_g1_i1 | dmso | control | -2,3141121 | -0,3073422 | 3,41E-06 | 5,24E-05   |
| TRINITY_DN13053_c0_g1_i1 | dmso | control | -2,3218171 | 4,17578213 | 5,35E-36 | 2,21E-33   |
| TRINITY_DN26294_c0_g1_i1 | dmso | control | -2,3408386 | -0,2215213 | 1,11E-06 | 1,91E-05   |
| TRINITY_DN31312_c0_g1_i1 | dmso | control | -2,3616133 | 1,29542455 | 3,94E-10 | 1,31E-08   |
| TRINITY_DN40328_c0_g1_i1 | dmso | control | -2,4044053 | 3,4342078  | 1,91E-29 | 5,32E-27   |
| TRINITY_DN14469_c0_g1_i1 | dmso | control | -2,4064193 | 1,26500885 | 1,50E-11 | 6,35E-10   |
| TRINITY_DN29229_c0_g1_i1 | dmso | control | -2,4200009 | -0,1646376 | 1,85E-07 | 3,87E-06   |

|                          |      |         |            |            |           |           |
|--------------------------|------|---------|------------|------------|-----------|-----------|
| TRINITY_DN68066_c0_g1_i1 | dmso | control | -2,422584  | 2,46063226 | 1,26E-17  | 1,15E-15  |
| TRINITY_DN27144_c0_g1_i1 | dmso | control | -2,4244344 | 1,97281394 | 4,70E-11  | 1,82E-09  |
| TRINITY_DN21706_c0_g1_i1 | dmso | control | -2,4639484 | 1,51851374 | 2,84E-10  | 9,82E-09  |
| TRINITY_DN38691_c0_g1_i1 | dmso | control | -2,4899862 | 0,13298165 | 5,61E-09  | 1,52E-07  |
| TRINITY_DN52089_c0_g1_i1 | dmso | control | -2,4924515 | -0,0038601 | 2,07E-07  | 4,25E-06  |
| TRINITY_DN27375_c0_g1_i1 | dmso | control | -2,5171415 | 1,97329167 | 4,17E-18  | 3,94E-16  |
| TRINITY_DN40376_c0_g1_i1 | dmso | control | -2,5824961 | 2,13976886 | 3,61E-16  | 2,88E-14  |
| TRINITY_DN17506_c0_g1_i1 | dmso | control | -2,6107616 | 3,18390383 | 2,10E-25  | 3,84E-23  |
| TRINITY_DN23443_c0_g1_i1 | dmso | control | -2,6147309 | -0,091664  | 2,57E-08  | 6,26E-07  |
| TRINITY_DN28742_c0_g1_i1 | dmso | control | -2,6179808 | 2,45230232 | 9,51E-16  | 7,08E-14  |
| TRINITY_DN24108_c0_g1_i1 | dmso | control | -2,6531884 | 3,82719332 | 1,29E-18  | 1,30E-16  |
| TRINITY_DN3680_c0_g1_i1  | dmso | control | -2,6706315 | 0,97329238 | 4,11E-10  | 1,37E-08  |
| TRINITY_DN7826_c0_g1_i1  | dmso | control | -2,7418949 | 1,94799193 | 2,05E-18  | 1,99E-16  |
| TRINITY_DN13164_c0_g1_i1 | dmso | control | -2,7631684 | 0,67144443 | 2,04E-12  | 9,87E-11  |
| TRINITY_DN24154_c0_g1_i1 | dmso | control | -2,8172172 | 0,17428097 | 1,52E-09  | 4,60E-08  |
| TRINITY_DN28283_c0_g1_i1 | dmso | control | -2,8553857 | -0,1935742 | 5,06E-09  | 1,38E-07  |
| TRINITY_DN49166_c0_g1_i1 | dmso | control | -2,8723541 | -0,5479592 | 6,13E-08  | 1,41E-06  |
| TRINITY_DN9863_c0_g1_i1  | dmso | control | -2,8879807 | 1,40032645 | 3,73E-13  | 2,06E-11  |
| TRINITY_DN45567_c0_g1_i1 | dmso | control | -2,9724324 | -0,0931608 | 6,63E-10  | 2,14E-08  |
| TRINITY_DN25391_c0_g1_i1 | dmso | control | -3,033361  | 0,72028446 | 2,73E-14  | 1,73E-12  |
| TRINITY_DN13907_c0_g1_i1 | dmso | control | -3,1108884 | 3,91883705 | 1,17E-16  | 9,64E-15  |
| TRINITY_DN42487_c0_g1_i1 | dmso | control | -3,1471458 | -0,1923808 | 3,44E-10  | 1,17E-08  |
| TRINITY_DN57390_c0_g1_i1 | dmso | control | -3,2151252 | -0,1308907 | 1,18E-09  | 3,63E-08  |
| TRINITY_DN45766_c0_g1_i1 | dmso | control | -3,4214995 | 2,15508335 | 3,73E-18  | 3,54E-16  |
| TRINITY_DN4159_c0_g1_i1  | dmso | control | -3,5921986 | 1,44576841 | 1,30E-19  | 1,48E-17  |
| TRINITY_DN43485_c0_g1_i1 | dmso | control | -3,6287686 | -0,452026  | 1,09E-10  | 4,05E-09  |
| TRINITY_DN22995_c0_g1_i1 | dmso | control | -3,6495434 | 3,88202601 | 1,10E-60  | 1,95E-57  |
| TRINITY_DN48321_c0_g1_i1 | dmso | control | -3,8729054 | 1,20475886 | 1,61E-10  | 5,76E-09  |
| TRINITY_DN11536_c0_g1_i1 | dmso | control | -3,9853454 | 5,42369558 | 5,93E-125 | 8,57E-121 |
| TRINITY_DN40182_c0_g1_i1 | dmso | control | -4,0558585 | 1,69690558 | 1,24E-29  | 3,51E-27  |
| TRINITY_DN47797_c0_g1_i1 | dmso | control | -4,0749421 | -0,5782928 | 2,57E-11  | 1,04E-09  |

|                          |      |         |            |            |          |          |
|--------------------------|------|---------|------------|------------|----------|----------|
| TRINITY_DN24257_c0_g1_i1 | dmso | control | -4,1163393 | 1,40514278 | 5,89E-24 | 9,78E-22 |
| TRINITY_DN44170_c0_g1_i1 | dmso | control | -4,3733345 | 0,37012289 | 1,10E-12 | 5,70E-11 |
