# Supplementary figures and images for: Sublethal Exposure Effects of the Neonicotinoid Clothianidin Strongly Modify the Brain Transcriptome and Proteome in the Male Moth Agrotis ipsilon
Source: MDPI journal article supplement (doi:10.3390/insects12020152), 2021-02-11

A

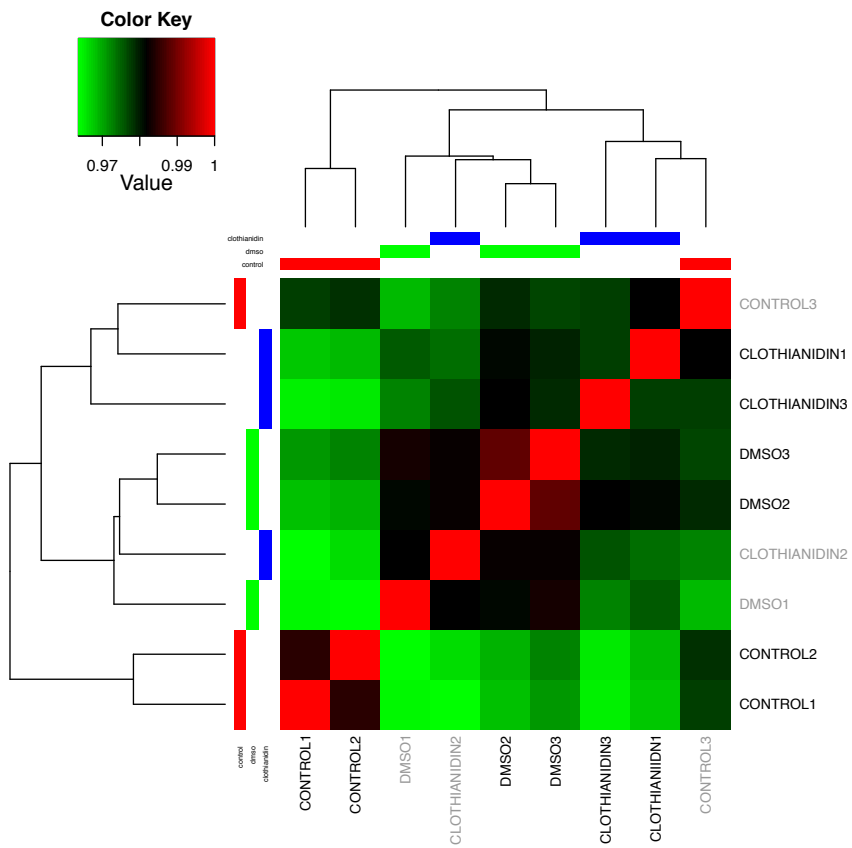

B

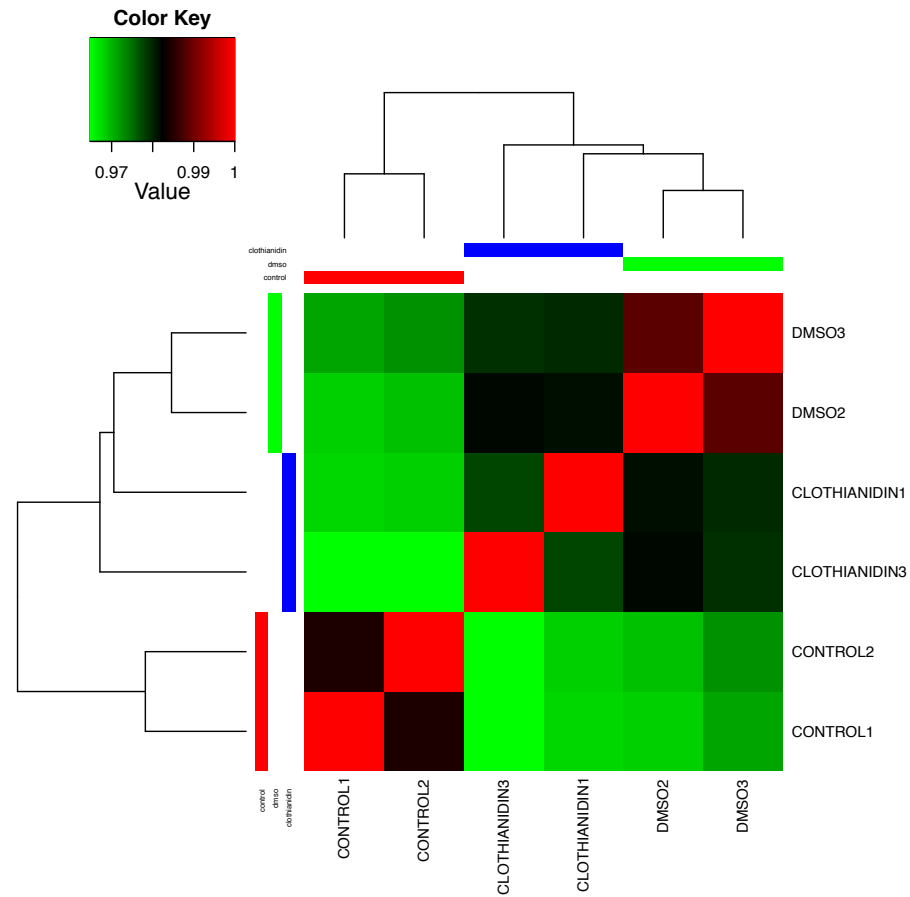

Supplement: s1 [file s1]
